# Supplementary material for: Antarctic Thraustochytrids as Sources of Carotenoids and High-Value Fatty Acids
Source: MDPI journal article supplement (doi:10.3390/md19070386), 2021-07-06
Supplement: s1 [file s1]

## SUPPLEMENTAL MATERIAL

### **Antarctic thraustochytrids as sources of carotenoids and high-value fatty acids**

Allison Leyton, Liset Flores, Carolina Shene, Yusuf Chisti, Giovanni Larama, Juan A. Asenjo, Roberto E. Armenta

**Table S1.** Some morphological characteristics of the isolated thraustochytrid strains. Colony texture: soft (S) or firm (F); colony size: punctiform (P) or small (S); color of the colony: white (W), light yellow (LY), or orange (O); growth in liquid medium (LM) as: individual (I) or grouped (G) cells; presence of motile zoospores (MZ).

**Table S2.** Effects of initial glucose concentration ( $G_0$ ) on biomass concentration ( $X$ ) and the content of total lipids ( $TL$ ) and carotenoids ( $TC$ ) in biomass of *Thraustochytrium* sp. RT2316-16 after 5 days of culture.

**Table S3.** *Thraustochytrium* sp. RT2316-16 genes annotated for biosynthesis, elongation and desaturation of fatty acids.

**Table S4.** *Thraustochytrium* sp. RT2316-16 genes annotated for biosynthesis of terpenoid backbone and carotenoids.

**Figure S1.** Light microscope image (40×) of some of the isolated thraustochytrid strains. (a) RT2316-29, (b) RT2316-15, (c) RT2316-45 and (d) RT2316-16.

**Figure S2.** Phylogenetic analysis of Antarctic thraustochytrids isolated from samples collected at different locations in Antarctica during Antarctic Scientific Expedition 54, February 2018 (Tables 1 and 2). Phylogenetic tree was generated by phylogeny.fr [41] (<http://www.phylogeny.fr>), using MUSCLE, ProtDist/FastDist+BioNJ (distance-based method) and TreeDyn, for multiple sequence alignment, tree construction and tree

visualization, respectively. Names shown in blue are isolates that accumulated carotenoids.

**Figure S3.** Thin layer chromatogram of carotenoids recovered from *Thraustochytrium* sp. RT2316-16 biomass (lanes 1–3) and authentic standards (astaxanthin, lane a; canthaxanthin, lane b;  $\beta$ -carotene, lane c).

**Figure S4.** Distribution of enzymes among the metabolic pathways of *Thraustochytrium* sp. RT2316-16, based on the enzyme genes identified in the genome. Results were obtained using KEGG Mapper Reconstruction tool.

**Figure S5.** Distribution of enzymes within the following metabolisms: carbohydrates (a); amino acids (b); and lipids (c). Based on genes identified in genome of *Thraustochytrium* sp. RT2316-16. Results were obtained using KEGG Mapper Reconstruction tool.

**Figure S6.** Terpenoid backbone biosynthesis in *Thraustochytrium* sp. RT2316-16. Results were obtained with the KEGG Mapper Reconstruction tool. Red boxes denote enzyme coded by the genes annotated in the genome.

**Figure S7.** Pairwise sequence alignment between Thraus\_T3283 and *crtIBY* *Aurantiochytrium* sp. KH105 (accession BBB35234.1) genes. Conserved domains are highlighted. Conserved Domains Database (CDD) tool at NCBI [60] was used to identify conserved domains.

**Table S1.** Some morphological characteristics of the isolated thraustochytrid strains. Colony texture: soft (S) or firm (F); colony size: punctiform (P) or small (S); color of the colony: white (W), light yellow (LY), or orange (O); growth in liquid medium (LM) as: individual (I) or grouped (G) cells; presence of motile zoospores (MZ).

| Strain    | Closest relative in<br>GenBank | Colony<br>texture | Colony<br>size | Color | Growth<br>in LM | MZ  |
|-----------|--------------------------------|-------------------|----------------|-------|-----------------|-----|
| RT2316-14 | <i>Oblongichytrium</i> sp.     | S                 | P              | W     | I               | Yes |
| RT2316-15 | <i>Oblongichytrium</i> sp.     | F                 | S              | W     | I               | No  |
| RT2316-18 | <i>Thraustochytrium</i> sp.    | S                 | P              | W     | I               | Yes |
| RT2316-21 | <i>Oblongichytrium</i> sp.     | F                 | S              | W     | I               | No  |
| RT2316-22 | <i>Oblongichytrium</i> sp.     | F                 | S              | W     | I               | No  |
| RT2316-23 | <i>Oblongichytrium</i> sp.     | F                 | S              | W     | I               | Yes |
| RT2316-24 | <i>Oblongichytrium</i> sp.     | F                 | S              | W     | I               | No  |
| RT2316-25 | <i>Oblongichytrium</i> sp.     | F                 | S              | W     | I               | No  |
| RT2316-26 | <i>Oblongichytrium</i> sp.     | F                 | S              | W     | I               | Yes |
| RT2316-28 | <i>Aurantiochytrium</i> sp.    | S                 | P              | W     | I               | No  |
| RT2316-29 | <i>Oblongichytrium</i> sp.     | S                 | S              | W     | I               | No  |
| RT2316-31 | <i>Oblongichytrium</i> sp.     | S                 | S              | W     | I               | No  |
| RT2316-37 | <i>Thraustochytrium</i> sp.    | F                 | S              | O     | G               | No  |
| RT2316-38 | <i>Thraustochytrium</i> sp.    | S                 | S              | LY    | I               | No  |
| RT2316-16 | <i>Thraustochytrium</i> sp.    | S                 | S              | O     | G               | No  |
| RT2316-45 | <i>Thraustochytrium</i> sp.    | F                 | S              | LY    | G               | No  |
| RT2316-44 | <i>Thraustochytrium</i> sp.    | F                 | S              | LY    | G               | No  |
| RT2316-17 | <i>Thraustochytrium</i> sp.    | F                 | S              | O     | I               | No  |
| RT2316-42 | <i>Thraustochytrium</i> sp.    | F                 | S              | O     | G               | No  |
| RT2316-40 | <i>Thraustochytrium</i> sp.    | S                 | P              | LY    | I               | No  |
| RT2316-49 | <i>Thraustochytriidae</i> sp.  | F                 | S              | LY    | G               | No  |
| RT2316-50 | <i>Aurantiochytrium</i> sp.    | S                 | S              | LY    | I               | No  |

**Table S2.** Effects of initial glucose concentration ( $G_0$ ) on biomass concentration ( $X$ ) and the content of total lipids ( $TL$ ) and carotenoids ( $TC$ ) in biomass of *Thraustochytrium* sp. RT2316-16 after 5 days of culture.

| $G_0$ (g/L) | $X$ (g/L) | $TL$ (%) <sup>£</sup> | $TC$ (µg/g) <sup>£</sup> | $GC$ (%) <sup>¥</sup> |
|-------------|-----------|-----------------------|--------------------------|-----------------------|
| 20          | 9.7±1.8   | 36.7±2.3 <sup>b</sup> | 60.8±0.3 <sup>a</sup>    | 94.6                  |
| 30          | 9.1±0.5   | 46.8±2.1 <sup>a</sup> | 51.7±3.4 <sup>b</sup>    | 79.3                  |
| 40          | 10.1±0.6  | 36.9±2.0 <sup>b</sup> | 51.8±4.9 <sup>b</sup>    | 63.5                  |
| 50          | 9.9±1.9   | 34.1±2.1 <sup>b</sup> | 51.6±1.3 <sup>b</sup>    | 51.0                  |

<sup>£</sup> A different superscript letter within a column denotes significant differences ( $p < 0.05$ ).

<sup>¥</sup> Glucose consumption ( $GC$ ) is the percentage of the initial glucose ( $G_0$ ) consumed by the biomass.

**Table S3.** *Thraustochytrium* sp. RT2316-16 genes annotated for biosynthesis, elongation and desaturation of fatty acids.

| Enzyme (reaction)                                                        | EC number         | Swiss Prot ID                         |
|--------------------------------------------------------------------------|-------------------|---------------------------------------|
| <b>Fatty acid biosynthesis</b>                                           |                   |                                       |
| Fatty acid synthase subunit $\beta$                                      | 2.3.1.86          | FAS1_YARLI; ORYB_ASPOR                |
| Fatty acid synthase subunit $\alpha$                                     | 2.3.1.86          | FAS2_YEAST                            |
| Malonyl CoA-acyl carrier protein transacylase                            | 2.3.1.39          | FABD_BACSU; FABD_HUMAN                |
| Acetyl-CoA carboxylase                                                   | 6.4.1.2           | ACAC_DICDI; ACACA_BOVIN;<br>ACACA_RAT |
| 3-Oxoacyl-[acyl-carrier-protein] synthase                                | 2.3.1.179         | KASM_ARATH                            |
| 3-Oxoacyl-[acyl-carrier-protein] reductase FabG                          | 1.1.1.100         | FABG_THEMA                            |
| Enoyl-[acyl-carrier-protein] reductase [NADH] FabI                       | 1.3.1.9; 1.3.1.10 | FABI_SYNY3                            |
| Long-chain-fatty-acid--CoA ligase                                        | 6.2.1.3           | LCFB_BACSU; ACSL3_PONAB               |
| Long-chain acyl-CoA synthetase                                           | 6.2.1.3           | LACS7_ARATH                           |
| <b>Biosynthesis of unsaturated fatty acids</b>                           |                   |                                       |
| Elongation of very long chain fatty acids protein 2 (ELOV2) <sup>‡</sup> | 2.3.1.199         | ELOH2_SCHPO                           |
| Elongation of very long chain fatty acids protein 4 (ELOV4) <sup>‡</sup> | 2.3.1.199         | ELOV4_MOUSE                           |

|                                                                          |            |                                     |
|--------------------------------------------------------------------------|------------|-------------------------------------|
| Elongation of very long chain fatty acids protein 5 (ELOV5) <sup>‡</sup> | 2.3.1.199  | ELOV5_XENTR                         |
| Elongation of very long chain fatty acids protein 6 (ELOV6) <sup>‡</sup> | 2.3.1.199  | ELOV6_MOUSE; ELOV6_CHICK            |
| Very-long-chain 3-oxoacyl-CoA reductase                                  | 1.1.1.330  | DHB12_BOVIN; KCR1_ARATH; KCR2_ARATH |
| Very-long-chain (3R)-3-hydroxyacyl-CoA dehydratase                       | 4.2.1.134  | HACD_CAEEL                          |
| Very-long-chain enoyl-CoA reductase                                      | 1.3.1.93   | None                                |
| Acyl-CoA desaturase ( $\Delta^9$ desaturase)                             | 1.14.19.1  | FAT7_CAEEL                          |
| Delta(12) fatty acid desaturase FAD2                                     | 1.14.19.6  | FAD2B_CALOF                         |
| Delta(8)-fatty-acid desaturase                                           | 1.14.19.3  | SLD2_ARATH                          |
| Acyl-lipid (8-3)-desaturase                                              | 1.14.19.44 | D5FAD_THRSP                         |
| Acyl-lipid (7-3)-desaturase ( $\Delta^4$ desaturase)                     | 1.14.19.31 | D4FAD_THRSP                         |

<sup>‡</sup> ELOVL2 acts specifically on polyunsaturated acyl-CoA with a higher activity toward C20:4n-6 and EPA-CoAs, among others [34]. Other substrates include DTA-CoA, EPA-CoA, DPA-CoA.

<sup>‡</sup> ELOLV4 substrates: DTA-CoA, C26:4n6-CoA, C28:4n6-CoA, C30:4n6-CoA, C32:4n6-CoA, C34:4n6-CoA, C34:6n6-CoA, C24:0-CoA, C26:0-CoA, C28:0-CoA, C30:0-CoA, DHA-CoA, C24:5n3-CoA, C24:6n3-CoA, C26:5n3-CoA, C26:6n3-CoA, C28:5n3-CoA, C28:6n3-CoA, C30:5n3-CoA, C30:6n3-CoA, C32:5n3-CoA, C32:6n3-CoA, C34:5n3-CoA, C34:6n3-CoA, C36:5n3-CoA.

<sup>‡</sup> ELOLV6 substrates: C12:0-CoA, C14:0-CoA, C16:0-CoA, C16:1-CoA, C18:1-CoA, C18:2n-6-CoA, C18:3n-3-CoA.

\*Gene Thraus\_T4048 was translated to protein, and queried by homology against non-redundant protein database in NCBI using BLASTP algorithm (<https://blast.ncbi.nlm.nih.gov>). The results showed a high identity match (63.9%) with a  $\Delta 5$ -desaturase of *Thraustochytrium aureum* (accession BAK08911.1).

**Table S4.** *Thraustochytrium* sp. RT2316-16 genes annotated for biosynthesis of terpenoid backbone and carotenoids.

| Enzyme (reaction)                                         | EC number                   | Swiss Prot ID                          |
|-----------------------------------------------------------|-----------------------------|----------------------------------------|
| Acetyl-CoA acetyltransferase                              | 2.3.1.9                     | THIL_ALLVD; THIC1_ARATH;<br>THIL_XENTR |
| Hydroxymethylglutaryl-CoA synthase A                      | 2.3.3.10                    | HMCSA_DICDI                            |
| 3-Hydroxy-3-methylglutaryl-coenzyme A reductase 2         | 1.1.1.34                    | HMDH2_DICDI                            |
| Mevalonate kinase                                         | 2.7.1.36                    | MVK_THEKO                              |
| Diphosphomevalonate decarboxylase                         | 4.1.1.33                    | MVD1_MOUSE                             |
| Isopentenyl-diphosphate $\Delta$ -isomerase 1             | 5.3.3.2                     | IDI1_BOVIN                             |
| Farnesyl pyrophosphate synthase                           | 2.5.1.1; 2.5.1.10           | FPPS_YEAST                             |
| Geranylgeranyl pyrophosphate synthase                     | 2.5.1.1; 2.5.1.10; 2.5.1.29 | GGPPS_MOUSE                            |
| Probable hexaprenyl pyrophosphate synthase, mitochondrial | 2.5.1.82; 2.5.1.83          | COQ1_NEUCR                             |
| Carotenoid 3,4-desaturase*                                | 1.3.99.37                   | CRTD_HALJT                             |
| Cytochrome P450 3A12                                      | 1.14.14.1                   | CP3AC_CANLF                            |



\* A blast search in NCBI showed a 59% identity match to  $\beta$ -carotene synthase of *Aurantiochytrium* sp. KH105 (accession BBB35234.1).

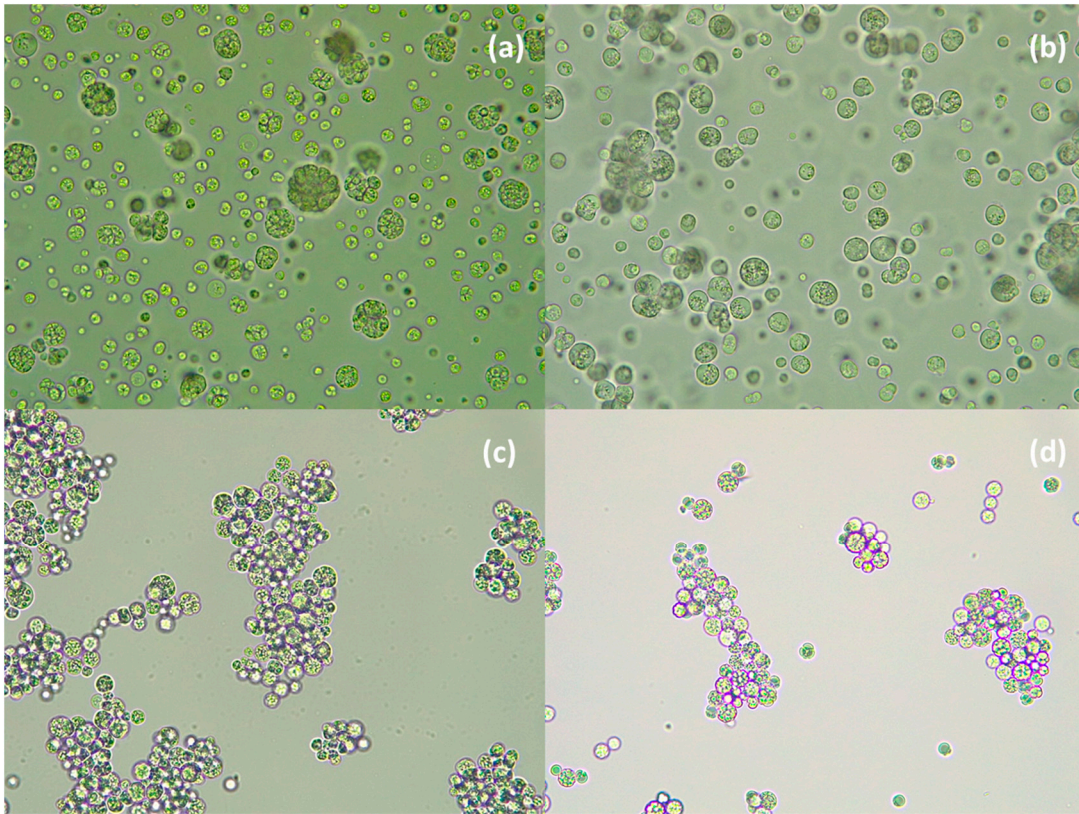

**Figure S1.** Light microscope image (40 $\times$ ) of some of the isolated thraustochytrid strains.

(a) RT2316-29, (b) RT2316-15, (c) RT2316-45 and (d) RT2316-16.

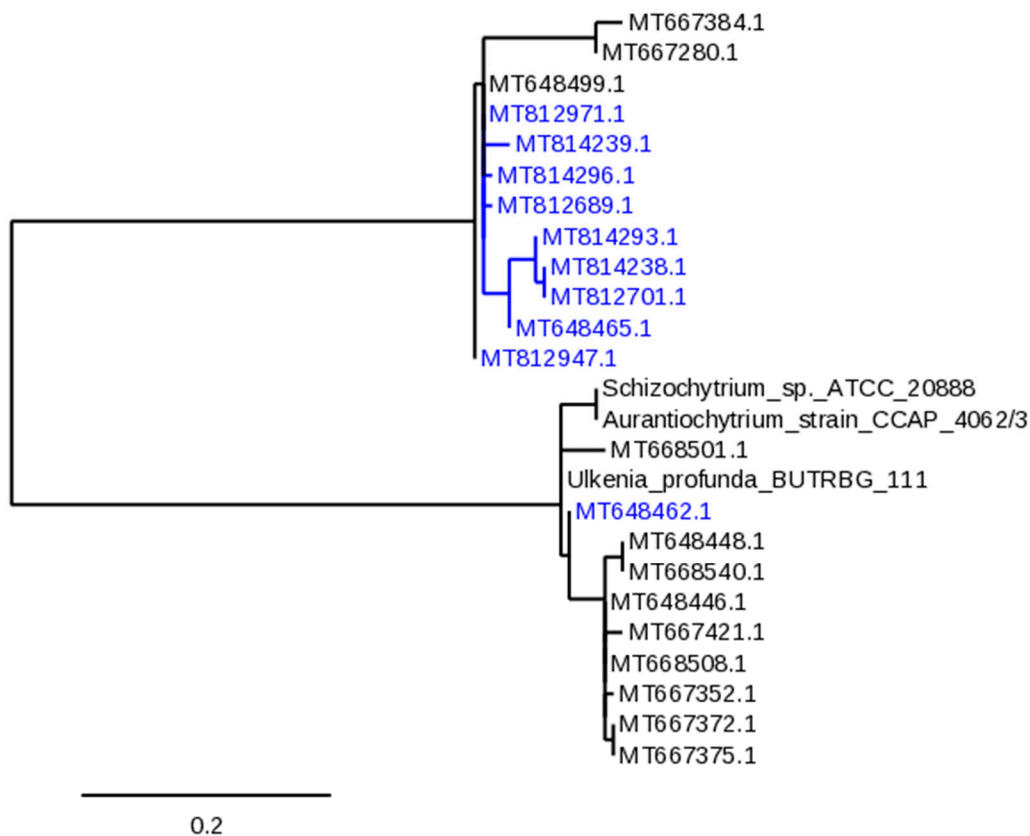

**Figure S2.** Phylogenetic analysis of Antarctic thraustochytrids isolated from samples collected at different locations in Antarctica during Antarctic Scientific Expedition 54, February 2018 (Tables 1 and 2). Phylogenetic tree was generated by phylogeny.fr [41] (<http://www.phylogeny.fr>), using MUSCLE, ProtDist/FastDist+BioNJ (distance-based method) and TreeDyn, for multiple sequence alignment, tree construction and tree visualization, respectively. Names shown in blue are isolates that accumulated carotenoids.

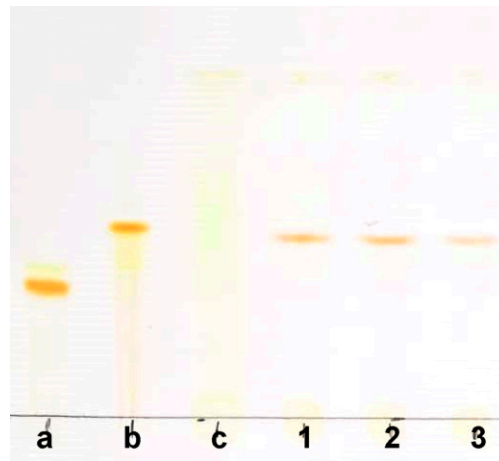

**Figure S3.** Thin layer chromatogram of carotenoids recovered from *Thraustochytrium* sp. RT2316-16 biomass (lanes 1–3) and authentic standards (astaxanthin, lane a; canthaxanthin, lane b;  $\beta$ -carotene, lane c).

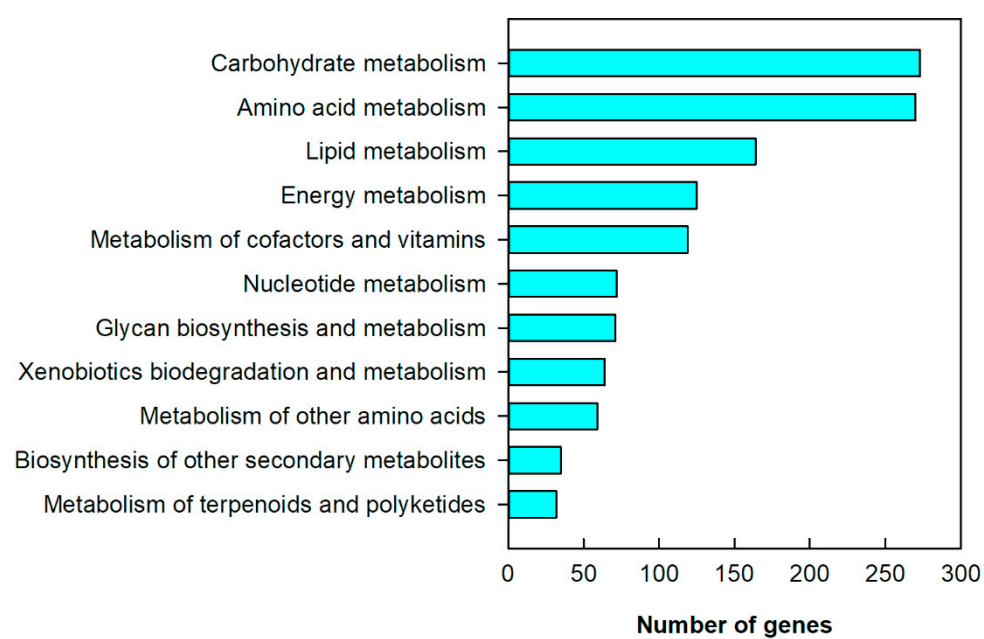

**Figure S4.** Distribution of enzymes among the metabolic pathways of *Thraustochytrium* sp. RT2316-16, based on the enzyme genes identified in the genome. Results were obtained using KEGG Mapper Reconstruction tool.

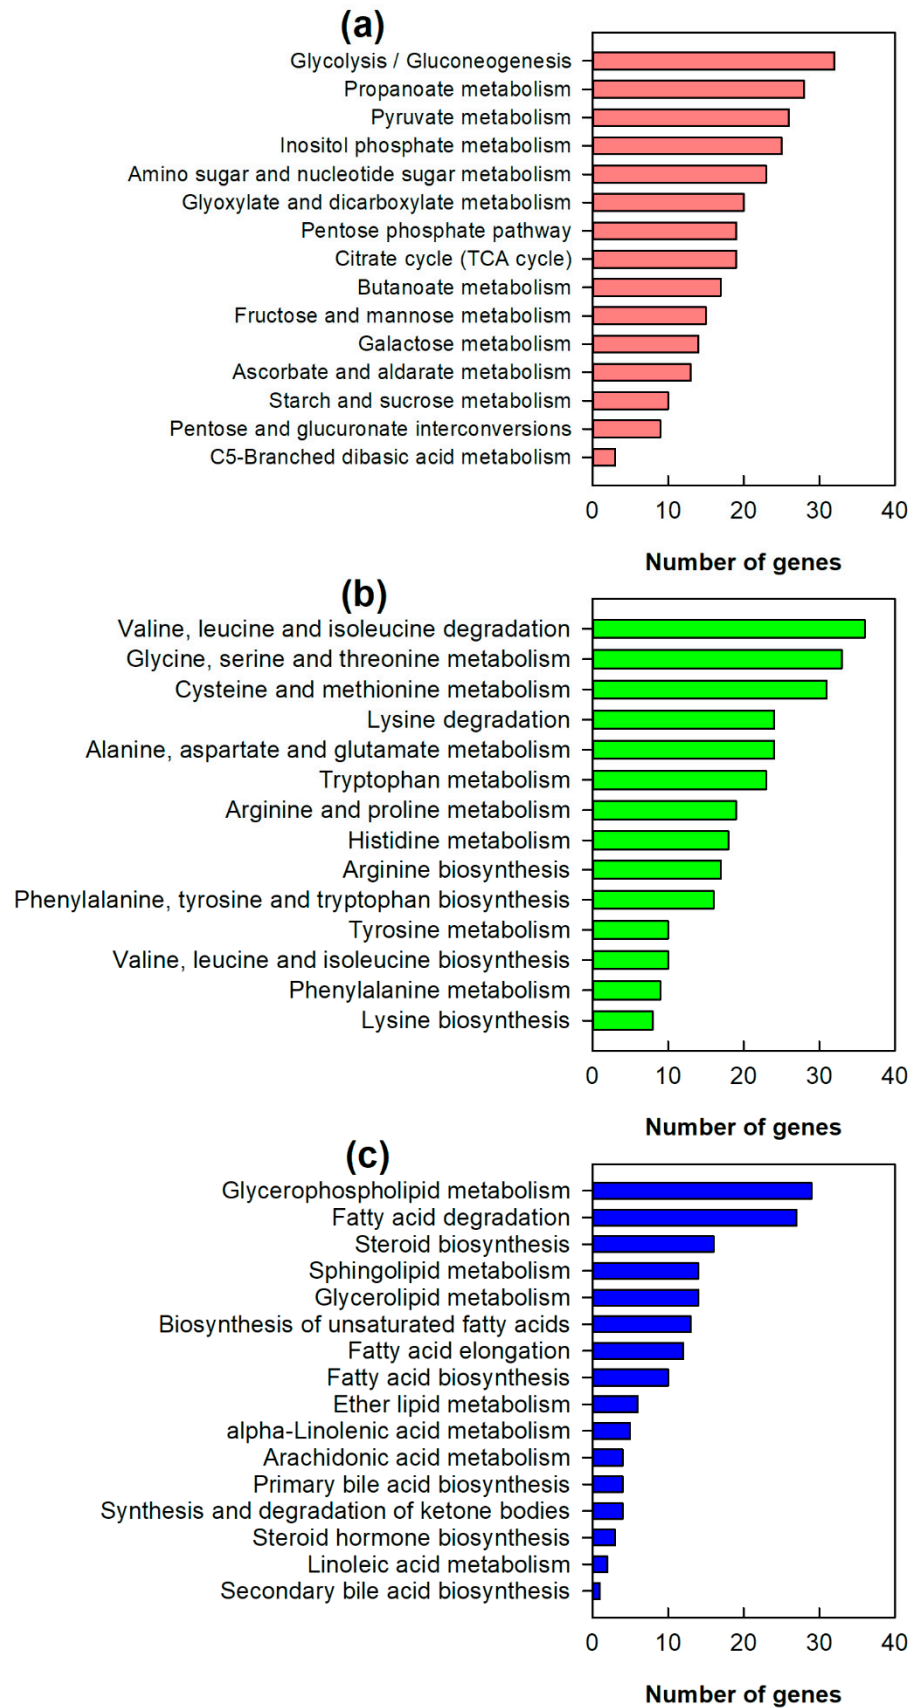

**Figure S5.** Distribution of enzymes within the following metabolisms: carbohydrates (a); amino acids (b); and lipids (c). Based on genes identified in genome of *Thraustochytrium* sp. RT2316-16. Results were obtained using KEGG Mapper Reconstruction tool.

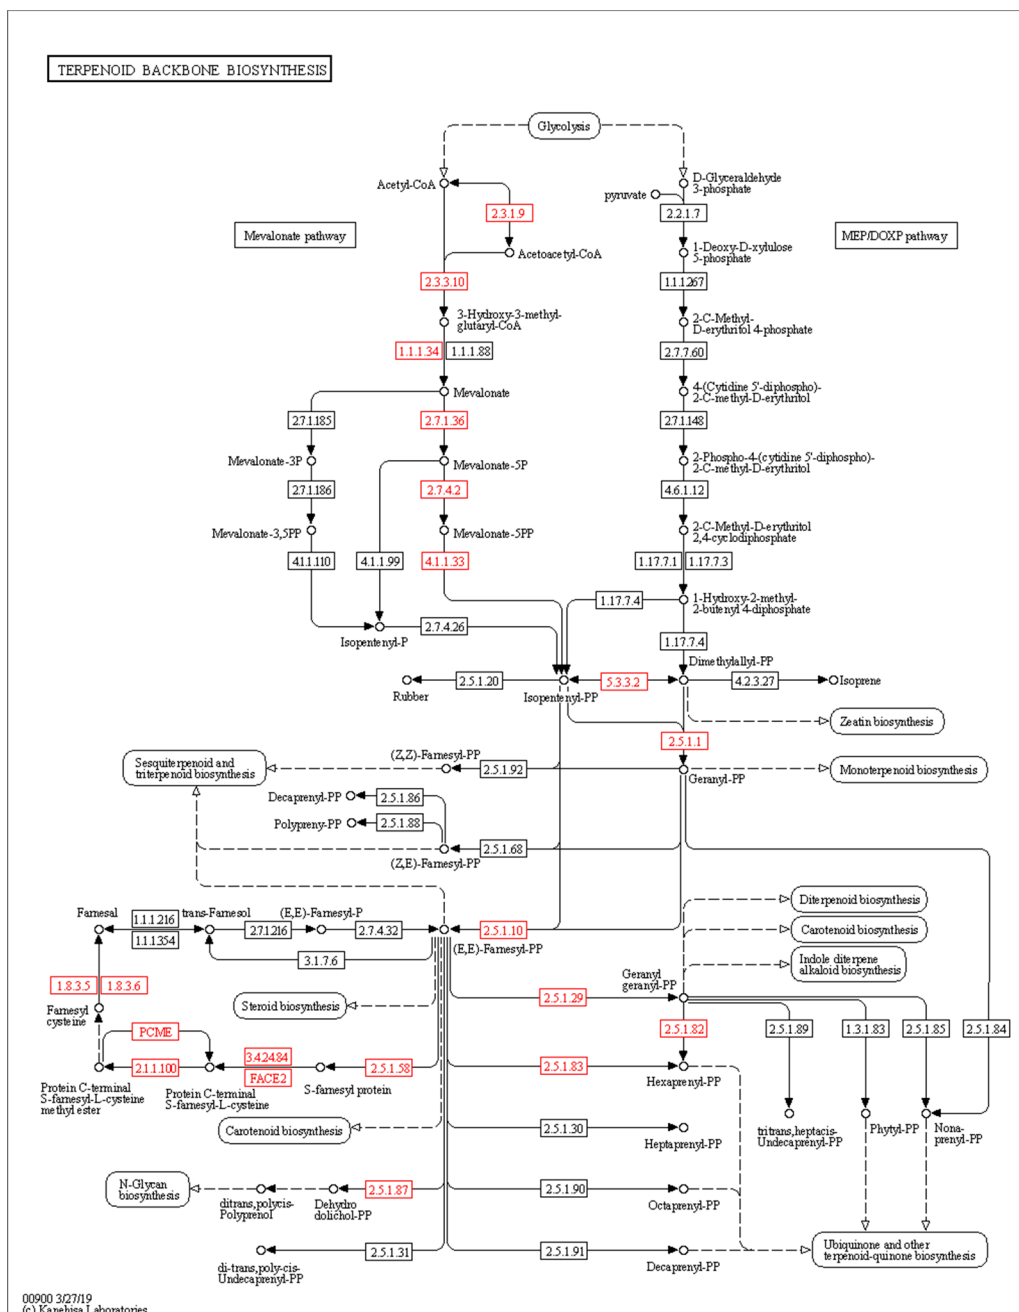

**Figure S6.** Terpenoid backbone biosynthesis in *Thraustochytrium* sp. RT2316-16.

Results were obtained with the KEGG Mapper Reconstruction tool. Red boxes denote enzymes coded by the genes annotated in the genome.



| ctrl superfamily   Bacterial-type phytoene desaturase |     |                                                                  |     |
|-------------------------------------------------------|-----|------------------------------------------------------------------|-----|
| <i>Thraustochytrium</i> sp. RT2316-16                 | 49  | QHIAVLGAGYAGLAAACELRLRGYAVTVYERNAFVGGRAHQFEAAG-----FTFDAGPSW     | 103 |
| <i>Aurantiochytrium</i> sp. KH105                     | 51  | + IAVLGAGYAGL+AACEL RLQ+ V V E+N +VGGRAHQFE F FDAGPSW            | 110 |
| <i>Thraustochytrium</i> sp. RT2316-16                 | 104 | YWMPEVDRFFARFGRRTRFYSITRLDPAYRVIGSRHGAAIDVPGTRA-GYMAWARR         | 162 |
| <i>Aurantiochytrium</i> sp. KH105                     | 111 | YWMPEVDRFFAR+GR +EFY + RLDPAYR+I +G +DVPQ + +M+WAR+              | 170 |
| <i>Thraustochytrium</i> sp. RT2316-16                 | 223 | RRFVSDPTLLMTLKWPVIFLGASPKAPALYSIMTYAGHALGTWYPSGGMTSPAKAMAAM      | 282 |
| <i>Aurantiochytrium</i> sp. KH105                     | 230 | ++++S TLLM LKWPVIFLGASP APALYS+MTY GHALGT+YP+GG+ P A+A +         | 289 |
| <i>Thraustochytrium</i> sp. RT2316-16                 | 283 | ARDMGVQIRLSAEVTSIKFDKTGEGSRASHVLGAADFQDPVDGIVGAGDYHTEQKLLPPR     | 342 |
| <i>Aurantiochytrium</i> sp. KH105                     | 290 | A+D+GV I+L AEVTS +FD+TG G +A + VDG+V A DY+H EQ LLPP              | 348 |
| <i>Thraustochytrium</i> sp. RT2316-16                 | 343 | AKDLGVDIQLDAEVTSFRFDETRGRGVQAVCTRNDRCCE-AVDGVVAAADYHHEVQTLPPPE   | 402 |
| <i>Aurantiochytrium</i> sp. KH105                     | 349 | LRRYDARYWERQVLSPLCLLFYLGVNRRVEGLLHHTFFDEDLDAHLAAAFERHEHSDRP      | 408 |
| <i>Thraustochytrium</i> sp. RT2316-16                 | 402 | LRRY+ +W+ QV+SPSC+LFYLG + R++GL HHTFFED DLDLH AAF+ H ++ P        | 462 |
| <i>Aurantiochytrium</i> sp. KH105                     | 406 | LRRYEQGFWDQVMSPCVLFLYLGFDHRIQGLTHHTFFEDRDLDAHLHAAFDTHTWAEPP      | 466 |
| <i>Thraustochytrium</i> sp. RT2316-16                 | 463 | TFYVSATSKTDPSTRPDGQGEALFVLVPISYRLNGTDTEALRRAVLHKVLERMERALGE      | 522 |
| <i>Aurantiochytrium</i> sp. KH105                     | 467 | FYVSATSKTDPS QGEALFVLVPISY+LNGTD A R +LH VL RME L +              | 526 |
| <i>Thraustochytrium</i> sp. RT2316-16                 | 523 | VFYVSATSKTDPVVTG--QGEALFVLVPISYQLNGTDNAARREQILHTVLTMRMEENLKQ     | 582 |
| <i>Aurantiochytrium</i> sp. KH105                     | 527 | PIRSALTYTRMYGPSDFAEFFHSFRGNAFGHANILSQSLILKPSMDSLADNIVFAGHLTN     | 582 |
| Squalene / Phytoene synthase                          |     |                                                                  |     |
| <i>Thraustochytrium</i> sp. RT2316-16                 | 583 | PLREWLVYQKSYGTTDFERDFHSFRGNAFGHANTLSQSLVLKPSMDSLNNLVFAGHLTN      | 642 |
| <i>Aurantiochytrium</i> sp. KH105                     | 560 | PGPGVPPSIVSGTVAAAGLLDVKLLDCERIEDPASHYLLTAAQHQHRRARLCAARPASQGR    | 617 |
| <i>Thraustochytrium</i> sp. RT2316-16                 | 643 | PGPGVPPSIVSGTV+A LL +++++ A+H+LL                                 | 702 |
| <i>Aurantiochytrium</i> sp. KH105                     | 618 | PGPGVPPSIVSGTVSANLLH-----DKLQVTANHHLLG-----                      | 677 |
| <i>Thraustochytrium</i> sp. RT2316-16                 | 703 | ELFKWGLAALAGLHVLAFAWVMVSARRRSYLLAVKLLFEHGRTYFAAATLMNLGAFDLTA     | 761 |
| <i>Aurantiochytrium</i> sp. KH105                     | 678 | F A L L + + S R SY+ ++LL+ HGRTYFAAATLM AFLDTA                    | 737 |
| <i>Thraustochytrium</i> sp. RT2316-16                 | 762 | --FTLLGALLGALFLGILTLVSFSTRFVSYSYVECIIRLLYVHGRTYFAAATLMKPMFAFLDTA | 780 |
| <i>Aurantiochytrium</i> sp. KH105                     | 738 | AMYALFRVADDFVDNEDAAAQRHANLETFIADFWRWCWESGTDYSLHPTLPALVESARRH     | 756 |
|                                                       |     | AMY LFRVADD+VDN A +R NL+ F+ADFWRWCWESG GDY+ HPTLPAL+ESA R        |     |
|                                                       |     | AMYG LFRVADDYVDNVGDAGERQRNLDAFMADFWRWCWESGRGDYARHPTLPALIESAHR    |     |
|                                                       |     | RYPRDLFERFFRSMRMDVG-DLVCETLDDTMDYMEGSAAVIGEFMLPVLMPAAAKSQVDR     |     |
|                                                       |     | YPR+LFRFFRSMRMD +VC T+DDTM+YMEGSAAVIGEFMLP+LMP +                 |     |
|                                                       |     | AYPRELFRFFRSMRMDAKRKVVCLTMDDTMEYMEGSAAVIGEFMLPILMPDRDSLAFKQ      |     |
|                                                       |     | AMPHARDLGLAFQLTNMIR 780                                          |     |
|                                                       |     | A+PHARDLGLAFQ+TNM+R                                              |     |
|                                                       |     | AIPHARDLGLAFQITNMIR 756                                          |     |

**Figure S7.** Pairwise sequence alignment between *Thraus\_T3283* and *crt1BY*

*Aurantiochytrium* sp. KH105 (accession BBB35234.1) genes. Conserved domains are highlighted. Conserved Domains Database (CDD) tool at NCBI [60] was used to identify conserved domains.
