# Supplementary material for: Antarctic Thraustochytrids as Sources of Carotenoids and High-Value Fatty Acids
Source: Mar Drugs. 2021 Jul 6;19(7):386. doi: 10.3390/md19070386 (PMC8303828; doi:10.3390/md19070386)
Supplement: Supplementary file 1 [file marinedrugs-19-00386-s001.zip › Supplemental file 1.xlsx]

## Sheet: genome2_annotation_nov2020
gene_id	protein_name	swissprot_id	%ID	e_value	KO_entry	EC_number	KO_data
Thraus_T3441	Putative white-brown complex homolog protein 30	WBC30_ARATH	43.353%	2.16e-30	NO_KO_DATA	NO_EC_NUMBER	NO_KO_DATA
Thraus_T706	Protein kinase 2	PK2_DICDI	54.783%	9.82e-131	K13303	2.7.11.1	Environmental Information Processing|Signal transduction|FoxO signaling pathway [PATH:ko04068]|serum/glucocorticoid-regulated kinase 2 [EC:2.7.11.1]	Environmental Information Processing|Signal transduction|PI3K-Akt signaling pathway [PATH:ko04151]|serum/glucocorticoid-regulated kinase 2 [EC:2.7.11.1]	Brite Hierarchies|Protein families: metabolism|Protein kinases [BR:ko01001]|serum/glucocorticoid-regulated kinase 2 [EC:2.7.11.1]
Thraus_T705	DNA topoisomerase 3	TOP3_DICDI	42.5%	3.62e-94	K03165	5.6.2.1	Genetic Information Processing|Replication and repair|Homologous recombination [PATH:ko03440]|DNA topoisomerase III [EC:5.6.2.1]	Genetic Information Processing|Replication and repair|Fanconi anemia pathway [PATH:ko03460]|DNA topoisomerase III [EC:5.6.2.1]	Brite Hierarchies|Protein families: genetic information processing|DNA replication proteins [BR:ko03032]|DNA topoisomerase III [EC:5.6.2.1]	Brite Hierarchies|Protein families: genetic information processing|DNA repair and recombination proteins [BR:ko03400]|DNA topoisomerase III [EC:5.6.2.1]
Thraus_T5606	Intraflagellar transport protein 140 homolog {ECO:0000305}	IF140_MOUSE	41.869%	1.08e-126	K19672	NO_EC_NUMBER	Brite Hierarchies|Protein families: genetic information processing|Chromosome and associated proteins [BR:ko03036]|intraflagellar transport protein 140
Thraus_T703	Serine/threonine-protein phosphatase PGAM5, mitochondrial	PGAM5_DANRE	42.553%	1.98e-46	K15637	3.1.3.16	Environmental Information Processing|Signal transduction|TNF signaling pathway [PATH:ko04668]|serine/threonine-protein phosphatase PGAM5 [EC:3.1.3.16]	Cellular Processes|Transport and catabolism|Mitophagy - animal [PATH:ko04137]|serine/threonine-protein phosphatase PGAM5 [EC:3.1.3.16]	Cellular Processes|Cell growth and death|Necroptosis [PATH:ko04217]|serine/threonine-protein phosphatase PGAM5 [EC:3.1.3.16]
Thraus_T5403	MYG1 exonuclease	MYG1_RAT	42.157%	4.03e-70	NO_KO_DATA	NO_EC_NUMBER	NO_KO_DATA
Thraus_T5098	60S ribosomal protein L7a	RL7A_TETTH	56.221%	1.57e-83	NO_KO_DATA	NO_EC_NUMBER	NO_KO_DATA
Thraus_T4633	Thymus-specific serine protease	TSSP_MOUSE	30.472%	1.45e-48	K09649	3.4.-.-	Brite Hierarchies|Protein families: metabolism|Peptidases and inhibitors [BR:ko01002]|thymus-specific serine protease [EC:3.4.-.-]
Thraus_T709	Secreted RxLR effector protein 48 {ECO:0000303|PubMed:29706971}	RLR48_PLAVT	38.255%	5.11e-15	NO_KO_DATA	NO_EC_NUMBER	NO_KO_DATA
Thraus_T708	Probable Xaa-Pro aminopeptidase P	AMPP1_TUBMM	40.111%	2.24e-74	K01262	3.4.11.9	Brite Hierarchies|Protein families: metabolism|Peptidases and inhibitors [BR:ko01002]|Xaa-Pro aminopeptidase [EC:3.4.11.9]
Thraus_T4695	Inorganic pyrophosphatase	IPYR_HUMAN	54.386%	1.2e-55	K01507	3.6.1.1	Metabolism|Energy metabolism|Oxidative phosphorylation [PATH:ko00190]|inorganic pyrophosphatase [EC:3.6.1.1]
Thraus_T4096	Probable WRKY transcription factor 19	WRK19_ARATH	57.609%	1.98e-31	NO_KO_DATA	NO_EC_NUMBER	NO_KO_DATA
Thraus_T5401	Transmembrane protein 184 homolog DDB_G0279555	T1843_DICDI	33.735%	8.3e-32	NO_KO_DATA	NO_EC_NUMBER	NO_KO_DATA
Thraus_T5406	Ubiquitin-like modifier-activating enzyme 5 {ECO:0000305}	UBA5_BOVIN	52.795%	1.3e-111	K12164	NO_EC_NUMBER	Brite Hierarchies|Protein families: genetic information processing|Ubiquitin system [BR:ko04121]|ubiquitin-like modifier-activating enzyme 5
Thraus_T5509	Phosphatidyl-N-methylethanolamine N-methyltransferase {ECO:0000255|HAMAP-Rule:MF_03216}	PLMT_ARATH	43.939%	1.28e-12	K00550	2.1.1.71	Metabolism|Lipid metabolism|Glycerophospholipid metabolism [PATH:ko00564]|phosphatidyl-N-methylethanolamine N-methyltransferase [EC:2.1.1.71]
Thraus_T5407	Serine hydroxymethyltransferase 4 {ECO:0000303|PubMed:10806255}	GLYC4_ARATH	61.087%	0	K00600	2.1.2.1	Metabolism|Carbohydrate metabolism|Glyoxylate and dicarboxylate metabolism [PATH:ko00630]|glycine hydroxymethyltransferase [EC:2.1.2.1]	Metabolism|Energy metabolism|Methane metabolism [PATH:ko00680]|glycine hydroxymethyltransferase [EC:2.1.2.1]	Metabolism|Amino acid metabolism|Glycine, serine and threonine metabolism [PATH:ko00260]|glycine hydroxymethyltransferase [EC:2.1.2.1]	Metabolism|Metabolism of other amino acids|Cyanoamino acid metabolism [PATH:ko00460]|glycine hydroxymethyltransferase [EC:2.1.2.1]	Metabolism|Metabolism of cofactors and vitamins|One carbon pool by folate [PATH:ko00670]|glycine hydroxymethyltransferase [EC:2.1.2.1]	Human Diseases|Drug resistance: antineoplastic|Antifolate resistance [PATH:ko01523]|glycine hydroxymethyltransferase [EC:2.1.2.1]
Thraus_T3880	Sodium/nucleoside cotransporter 1	S28A1_RAT	50.971%	3.6e-98	K11536	NO_EC_NUMBER	Brite Hierarchies|Protein families: signaling and cellular processes|Transporters [BR:ko02000]|pyrimidine nucleoside transport protein
Thraus_T3047	JmjC domain-containing protein F	JMJCF_DICDI	25.397%	2.03e-07	NO_KO_DATA	NO_EC_NUMBER	NO_KO_DATA
Thraus_T3882	Methylmalonyl-CoA mutase, mitochondrial	MUTA_MOUSE	58.611%	0	K01847	5.4.99.2	Metabolism|Carbohydrate metabolism|Glyoxylate and dicarboxylate metabolism [PATH:ko00630]|methylmalonyl-CoA mutase [EC:5.4.99.2]	Metabolism|Carbohydrate metabolism|Propanoate metabolism [PATH:ko00640]|methylmalonyl-CoA mutase [EC:5.4.99.2]	Metabolism|Energy metabolism|Carbon fixation pathways in prokaryotes [PATH:ko00720]|methylmalonyl-CoA mutase [EC:5.4.99.2]	Metabolism|Amino acid metabolism|Valine, leucine and isoleucine degradation [PATH:ko00280]|methylmalonyl-CoA mutase [EC:5.4.99.2]
Thraus_T3638	Leucine-zipper-like transcriptional regulator 1 homolog {ECO:0000303|PubMed:30442766}	LZTR1_DROME	25.948%	1.56e-30	K23330	NO_EC_NUMBER	Brite Hierarchies|Protein families: genetic information processing|Ubiquitin system [BR:ko04121]|leucine-zipper-like transcriptional regulator 1
Thraus_T3884	U3 small nucleolar RNA-interacting protein 2	U3IP2_HUMAN	45.706%	6.83e-96	K14793	NO_EC_NUMBER	Brite Hierarchies|Protein families: genetic information processing|Ribosome biogenesis [BR:ko03009]|ribosomal RNA-processing protein 9
Thraus_T3885	Synapse-associated protein 1 {ECO:0000305}	SYAP1_MOUSE	44.068%	2.24e-23	NO_KO_DATA	NO_EC_NUMBER	NO_KO_DATA
Thraus_T3886	Short-chain-enoyl-CoA hydratase {ECO:0000305}	CRT_CLOAB	31.102%	6e-25	K01715	4.2.1.17	Metabolism|Carbohydrate metabolism|Butanoate metabolism [PATH:ko00650]|enoyl-CoA hydratase [EC:4.2.1.17]
Thraus_T3887	GDP-fucose transporter 1 {ECO:0000303|PubMed:27381418}	GFT1_ARATH	38.488%	1.85e-56	NO_KO_DATA	NO_EC_NUMBER	NO_KO_DATA
Thraus_T3888	Trafficking protein particle complex subunit 1	TPPC1_HUMAN	31.544%	1.34e-17	K20300	NO_EC_NUMBER	Brite Hierarchies|Protein families: genetic information processing|Membrane trafficking [BR:ko04131]|trafficking protein particle complex subunit 1
Thraus_T497	Ribosomal protein S6 kinase 2 alpha	KS6AA_XENLA	36.522%	4.13e-16	K04373	2.7.11.1	Environmental Information Processing|Signal transduction|MAPK signaling pathway [PATH:ko04010]|ribosomal protein S6 kinase alpha-1/2/3/6 [EC:2.7.11.1]	Environmental Information Processing|Signal transduction|mTOR signaling pathway [PATH:ko04150]|ribosomal protein S6 kinase alpha-1/2/3/6 [EC:2.7.11.1]	Cellular Processes|Cell growth and death|Oocyte meiosis [PATH:ko04114]|ribosomal protein S6 kinase alpha-1/2/3/6 [EC:2.7.11.1]	Organismal Systems|Endocrine system|Progesterone-mediated oocyte maturation [PATH:ko04914]|ribosomal protein S6 kinase alpha-1/2/3/6 [EC:2.7.11.1]	Organismal Systems|Nervous system|Long-term potentiation [PATH:ko04720]|ribosomal protein S6 kinase alpha-1/2/3/6 [EC:2.7.11.1]	Organismal Systems|Nervous system|Neurotrophin signaling pathway [PATH:ko04722]|ribosomal protein S6 kinase alpha-1/2/3/6 [EC:2.7.11.1]	Organismal Systems|Environmental adaptation|Thermogenesis [PATH:ko04714]|ribosomal protein S6 kinase alpha-1/2/3/6 [EC:2.7.11.1]	Human Diseases|Endocrine and metabolic disease|Insulin resistance [PATH:ko04931]|ribosomal protein S6 kinase alpha-1/2/3/6 [EC:2.7.11.1]	Human Diseases|Infectious disease: bacterial|Yersinia infection [PATH:ko05135]|ribosomal protein S6 kinase alpha-1/2/3/6 [EC:2.7.11.1]	Brite Hierarchies|Protein families: metabolism|Protein kinases [BR:ko01001]|ribosomal protein S6 kinase alpha-1/2/3/6 [EC:2.7.11.1]	Brite Hierarchies|Protein families: genetic information processing|Messenger RNA biogenesis [BR:ko03019]|ribosomal protein S6 kinase alpha-1/2/3/6 [EC:2.7.11.1]
Thraus_T496	Uncharacterized protein C3B9.05	YGU5_SCHPO	43.038%	8.72e-15	NO_KO_DATA	NO_EC_NUMBER	NO_KO_DATA
Thraus_T495	60S ribosomal protein L43	RL43_ASHGO	64.045%	1.41e-37	K02921	NO_EC_NUMBER	Genetic Information Processing|Translation|Ribosome [PATH:ko03010]|large subunit ribosomal protein L37Ae	Brite Hierarchies|Protein families: genetic information processing|Ribosome [BR:ko03011]|large subunit ribosomal protein L37Ae
Thraus_T494	Radial spoke head protein 9 homolog	RSPH9_HUMAN	37.5%	1.61e-29	K19757	NO_EC_NUMBER	Brite Hierarchies|Protein families: signaling and cellular processes|Cytoskeleton proteins [BR:ko04812]|radial spoke head protein 9
Thraus_T492	Canalicular multispecific organic anion transporter 1 {ECO:0000305}	MRP2_HUMAN	44.66%	8.69e-38	K05666	NO_EC_NUMBER	Environmental Information Processing|Membrane transport|ABC transporters [PATH:ko02010]|ATP-binding cassette, subfamily C (CFTR/MRP), member 2	Organismal Systems|Digestive system|Bile secretion [PATH:ko04976]|ATP-binding cassette, subfamily C (CFTR/MRP), member 2	Human Diseases|Drug resistance: antineoplastic|Platinum drug resistance [PATH:ko01524]|ATP-binding cassette, subfamily C (CFTR/MRP), member 2	Human Diseases|Drug resistance: antineoplastic|Antifolate resistance [PATH:ko01523]|ATP-binding cassette, subfamily C (CFTR/MRP), member 2	Brite Hierarchies|Protein families: signaling and cellular processes|Transporters [BR:ko02000]|ATP-binding cassette, subfamily C (CFTR/MRP), member 2
Thraus_T491	2-dehydro-3-deoxyphosphooctonate aldolase 1	KDSA1_ARATH	45.283%	1.35e-64	K01627	2.5.1.55	Metabolism|Glycan biosynthesis and metabolism|Lipopolysaccharide biosynthesis [PATH:ko00540]|2-dehydro-3-deoxyphosphooctonate aldolase (KDO 8-P synthase) [EC:2.5.1.55]	Brite Hierarchies|Protein families: metabolism|Lipopolysaccharide biosynthesis proteins [BR:ko01005]|2-dehydro-3-deoxyphosphooctonate aldolase (KDO 8-P synthase) [EC:2.5.1.55]
Thraus_T490	Inositol-pentakisphosphate 2-kinase IPK1 {ECO:0000305}	IPK1_ORYSJ	32.646%	3.34e-39	K10572	2.7.1.158	Metabolism|Carbohydrate metabolism|Inositol phosphate metabolism [PATH:ko00562]|inositol-pentakisphosphate 2-kinase [EC:2.7.1.158]	Environmental Information Processing|Signal transduction|Phosphatidylinositol signaling system [PATH:ko04070]|inositol-pentakisphosphate 2-kinase [EC:2.7.1.158]
Thraus_T2043	Histidine triad nucleotide-binding protein 1	HINT1_RABIT	43.137%	2.2e-16	K02503	NO_EC_NUMBER	Brite Hierarchies|Protein families: signaling and cellular processes|Exosome [BR:ko04147]|histidine triad (HIT) family protein
Thraus_T2041	RxLR effector protein Htp1 {ECO:0000303|PubMed:20659163}	HTP1_SAPPC	56.818%	2.33e-06	NO_KO_DATA	NO_EC_NUMBER	NO_KO_DATA
Thraus_T2040	Sulfate adenylyltransferase {ECO:0000255|HAMAP-Rule:MF_03106}	MET3_SCHPO	37.958%	1.56e-81	K00958	2.7.7.4	Metabolism|Energy metabolism|Sulfur metabolism [PATH:ko00920]|sulfate adenylyltransferase [EC:2.7.7.4]	Metabolism|Nucleotide metabolism|Purine metabolism [PATH:ko00230]|sulfate adenylyltransferase [EC:2.7.7.4]	Metabolism|Metabolism of other amino acids|Selenocompound metabolism [PATH:ko00450]|sulfate adenylyltransferase [EC:2.7.7.4]	Metabolism|Biosynthesis of other secondary metabolites|Monobactam biosynthesis [PATH:ko00261]|sulfate adenylyltransferase [EC:2.7.7.4]
Thraus_T2047	Tenascin-X {ECO:0000305}	TENX_HUMAN	36.129%	9.62e-14	K06252	NO_EC_NUMBER	Environmental Information Processing|Signal transduction|PI3K-Akt signaling pathway [PATH:ko04151]|tenascin	Environmental Information Processing|Signaling molecules and interaction|ECM-receptor interaction [PATH:ko04512]|tenascin	Cellular Processes|Cellular community - eukaryotes|Focal adhesion [PATH:ko04510]|tenascin	Human Diseases|Cancer: overview|MicroRNAs in cancer [PATH:ko05206]|tenascin	Human Diseases|Infectious disease: viral|Human papillomavirus infection [PATH:ko05165]|tenascin	Brite Hierarchies|Protein families: signaling and cellular processes|Glycosaminoglycan binding proteins [BR:ko00536]|tenascin
Thraus_T2046	Kinesin-like protein unc-104	KIF1A_AEDAE	38.31%	1.08e-51	NO_KO_DATA	NO_EC_NUMBER	NO_KO_DATA
Thraus_T499	Kinesin-like protein KIF17	KIF17_MOUSE	45.627%	4.36e-51	K20198	NO_EC_NUMBER	Brite Hierarchies|Protein families: signaling and cellular processes|Cytoskeleton proteins [BR:ko04812]|kinesin family member 17
Thraus_T498	AP-3 complex subunit mu	AP3M_DICDI	37.653%	5.18e-91	K12398	NO_EC_NUMBER	Cellular Processes|Transport and catabolism|Lysosome [PATH:ko04142]|AP-3 complex subunit mu	Brite Hierarchies|Protein families: genetic information processing|Membrane trafficking [BR:ko04131]|AP-3 complex subunit mu
Thraus_T4728	Uncharacterized 37.6 kDa protein in cld 5'region	YCL2_ECO11	42.73%	1.23e-70	NO_KO_DATA	NO_EC_NUMBER	NO_KO_DATA
Thraus_T4729	Dynein light chain Tctex-type 1	DYLT1_HUMAN	52.679%	1.2e-38	K10420	NO_EC_NUMBER	Brite Hierarchies|Protein families: signaling and cellular processes|Cytoskeleton proteins [BR:ko04812]|dynein light chain Tctex-type 1
Thraus_T5409	Histone acetyltransferase GCN5	GCN5_ORYSJ	43.544%	2.27e-93	K06062	2.3.1.48	Environmental Information Processing|Signal transduction|Notch signaling pathway [PATH:ko04330]|histone acetyltransferase [EC:2.3.1.48]	Organismal Systems|Endocrine system|Thyroid hormone signaling pathway [PATH:ko04919]|histone acetyltransferase [EC:2.3.1.48]	Human Diseases|Cancer: overview|Viral carcinogenesis [PATH:ko05203]|histone acetyltransferase [EC:2.3.1.48]	Human Diseases|Infectious disease: viral|Human T-cell leukemia virus 1 infection [PATH:ko05166]|histone acetyltransferase [EC:2.3.1.48]	Brite Hierarchies|Protein families: genetic information processing|Transcription machinery [BR:ko03021]|histone acetyltransferase [EC:2.3.1.48]	Brite Hierarchies|Protein families: genetic information processing|Chromosome and associated proteins [BR:ko03036]|histone acetyltransferase [EC:2.3.1.48]
Thraus_T4720	Retrovirus-related Pol polyprotein from transposon RE2	POLR2_ARATH	39.85%	2.44e-21	NO_KO_DATA	NO_EC_NUMBER	NO_KO_DATA
Thraus_T4631	Thiamine phosphate phosphatase-like protein {ECO:0000303|PubMed:26537753}	PPSP3_ARATH	35.938%	1.18e-30	K13248	3.1.3.74	Metabolism|Metabolism of cofactors and vitamins|Vitamin B6 metabolism [PATH:ko00750]|pyridoxal phosphate phosphatase PHOSPHO2 [EC:3.1.3.74]	Brite Hierarchies|Protein families: metabolism|Protein phosphatases and associated proteins [BR:ko01009]|pyridoxal phosphate phosphatase PHOSPHO2 [EC:3.1.3.74]
Thraus_T4722	Dynein light chain 1, axonemal	DNAL1_CHLRE	48.765%	4.98e-46	K10411	NO_EC_NUMBER	Human Diseases|Neurodegenerative disease|Huntington disease [PATH:ko05016]|dynein light chain 1, axonemal	Brite Hierarchies|Protein families: signaling and cellular processes|Cytoskeleton proteins [BR:ko04812]|dynein light chain 1, axonemal
Thraus_T4723	Retrovirus-related Pol polyprotein from transposon TNT 1-94	POLX_TOBAC	31.646%	1.29e-19	NO_KO_DATA	NO_EC_NUMBER	NO_KO_DATA
Thraus_T4724	Retrovirus-related Pol polyprotein from transposon RE1	POLR1_ARATH	41.121%	2.26e-16	NO_KO_DATA	NO_EC_NUMBER	NO_KO_DATA
Thraus_T4725	Copia protein	COPIA_DROME	39.344%	2.46e-06	NO_KO_DATA	NO_EC_NUMBER	NO_KO_DATA
Thraus_T4094	Uncharacterized protein MJ1628	Y1628_METJA	32.237%	6.83e-14	K06924	NO_EC_NUMBER	Not Included in Pathway or Brite|Poorly characterized|Function unknown|uncharacterized protein
Thraus_T4727	Ubiquitin carboxyl-terminal hydrolase 4	UBP4_HUMAN	37.975%	5.98e-27	K11835	3.4.19.12	Brite Hierarchies|Protein families: metabolism|Peptidases and inhibitors [BR:ko01002]|ubiquitin carboxyl-terminal hydrolase 4/11 [EC:3.4.19.12]	Brite Hierarchies|Protein families: genetic information processing|Ubiquitin system [BR:ko04121]|ubiquitin carboxyl-terminal hydrolase 4/11 [EC:3.4.19.12]
Thraus_T5383	Severin	SEVE_DICDI	39.071%	2.04e-72	K05768	NO_EC_NUMBER	Cellular Processes|Cell motility|Regulation of actin cytoskeleton [PATH:ko04810]|gelsolin	Organismal Systems|Immune system|Fc gamma R-mediated phagocytosis [PATH:ko04666]|gelsolin	Human Diseases|Cancer: overview|Viral carcinogenesis [PATH:ko05203]|gelsolin	Brite Hierarchies|Protein families: signaling and cellular processes|Cytoskeleton proteins [BR:ko04812]|gelsolin	Brite Hierarchies|Protein families: signaling and cellular processes|Exosome [BR:ko04147]|gelsolin
Thraus_T5007	Mitochondrial inner membrane magnesium transporter LPE10	LPE10_YARLI	28.114%	2.47e-16	K16075	NO_EC_NUMBER	Brite Hierarchies|Protein families: signaling and cellular processes|Transporters [BR:ko02000]|magnesium transporter
Thraus_T5609	Probable E3 ubiquitin-protein ligase HERC4	HERC4_MOUSE	38.676%	3.9e-54	K10615	2.3.2.26	Genetic Information Processing|Folding, sorting and degradation|Ubiquitin mediated proteolysis [PATH:ko04120]|E3 ubiquitin-protein ligase HERC4 [EC:2.3.2.26]	Brite Hierarchies|Protein families: genetic information processing|Ubiquitin system [BR:ko04121]|E3 ubiquitin-protein ligase HERC4 [EC:2.3.2.26]
Thraus_T3704	Fumarate hydratase class I, aerobic {ECO:0000303|PubMed:3282546}	FUMA_ECOLI	65.619%	0	K01676	4.2.1.2	Metabolism|Carbohydrate metabolism|Citrate cycle (TCA cycle) [PATH:ko00020]|fumarate hydratase, class I [EC:4.2.1.2]	Metabolism|Carbohydrate metabolism|Pyruvate metabolism [PATH:ko00620]|fumarate hydratase, class I [EC:4.2.1.2]	Metabolism|Energy metabolism|Carbon fixation pathways in prokaryotes [PATH:ko00720]|fumarate hydratase, class I [EC:4.2.1.2]
Thraus_T2801	Tubulin polyglutamylase TTLL4	TTLL4_MOUSE	36.299%	5.22e-33	K16601	6.-.-.-	Brite Hierarchies|Protein families: signaling and cellular processes|Cytoskeleton proteins [BR:ko04812]|tubulin polyglutamylase TTLL4 [EC:6.-.-.-]
Thraus_T2800	Flagellar radial spoke protein 3 {ECO:0000305}	RSP3_CHLRE	50.787%	2.11e-58	K23965	NO_EC_NUMBER
Thraus_T4095	4-hydroxybenzoate polyprenyltransferase, mitochondrial {ECO:0000255|HAMAP-Rule:MF_03189}	COQ2_ARATH	45.897%	2.68e-82	K06125	2.5.1.39	Metabolism|Metabolism of cofactors and vitamins|Ubiquinone and other terpenoid-quinone biosynthesis [PATH:ko00130]|4-hydroxybenzoate polyprenyltransferase [EC:2.5.1.39]	Brite Hierarchies|Protein families: metabolism|Prenyltransferases [BR:ko01006]|4-hydroxybenzoate polyprenyltransferase [EC:2.5.1.39]
Thraus_T3027	Retrovirus-related Pol polyprotein from transposon RE1	POLR1_ARATH	35.849%	1.42e-10	NO_KO_DATA	NO_EC_NUMBER	NO_KO_DATA
Thraus_T5121	Beta-adaptin-like protein A	APBLA_ARATH	40.206%	9.63e-93	NO_KO_DATA	NO_EC_NUMBER	NO_KO_DATA
Thraus_T4276	Sm-like protein LSM3B {ECO:0000305}	LSM3B_ARATH	55.556%	5.2e-21	K12622	NO_EC_NUMBER	Genetic Information Processing|Transcription|Spliceosome [PATH:ko03040]|U6 snRNA-associated Sm-like protein LSm3	Genetic Information Processing|Folding, sorting and degradation|RNA degradation [PATH:ko03018]|U6 snRNA-associated Sm-like protein LSm3	Brite Hierarchies|Protein families: genetic information processing|Messenger RNA biogenesis [BR:ko03019]|U6 snRNA-associated Sm-like protein LSm3	Brite Hierarchies|Protein families: genetic information processing|Spliceosome [BR:ko03041]|U6 snRNA-associated Sm-like protein LSm3
Thraus_T5123	Ileal sodium/bile acid cotransporter	NTCP2_HUMAN	36.538%	2.96e-23	K14342	NO_EC_NUMBER	Organismal Systems|Digestive system|Bile secretion [PATH:ko04976]|solute carrier family 10 (sodium/bile acid cotransporter), member 2	Brite Hierarchies|Protein families: signaling and cellular processes|Transporters [BR:ko02000]|solute carrier family 10 (sodium/bile acid cotransporter), member 2
Thraus_T5122	Tubulin--tyrosine ligase	TTL_RAT	29.132%	4.65e-40	K06047	6.3.2.25	Brite Hierarchies|Protein families: signaling and cellular processes|Cytoskeleton proteins [BR:ko04812]|tubulin---tyrosine ligase [EC:6.3.2.25]
Thraus_T5382	Arylsulfatase	ARS_STRPU	29.877%	6.23e-21	K01134	3.1.6.8	Metabolism|Lipid metabolism|Sphingolipid metabolism [PATH:ko00600]|arylsulfatase A [EC:3.1.6.8]	Cellular Processes|Transport and catabolism|Lysosome [PATH:ko04142]|arylsulfatase A [EC:3.1.6.8]
Thraus_T4277	Probable DNA replication complex GINS protein PSF3	PSF3_DICDI	31.977%	9.35e-23	K10734	NO_EC_NUMBER	Brite Hierarchies|Protein families: genetic information processing|DNA replication proteins [BR:ko03032]|GINS complex subunit 3
Thraus_T3229	Cell division control protein 48 homolog E	CD48E_ARATH	38.628%	5.44e-48	K13525	NO_EC_NUMBER	Genetic Information Processing|Folding, sorting and degradation|Protein processing in endoplasmic reticulum [PATH:ko04141]|transitional endoplasmic reticulum ATPase	Human Diseases|Infectious disease: bacterial|Legionellosis [PATH:ko05134]|transitional endoplasmic reticulum ATPase	Brite Hierarchies|Protein families: genetic information processing|Messenger RNA biogenesis [BR:ko03019]|transitional endoplasmic reticulum ATPase	Brite Hierarchies|Protein families: genetic information processing|Membrane trafficking [BR:ko04131]|transitional endoplasmic reticulum ATPase	Brite Hierarchies|Protein families: signaling and cellular processes|Exosome [BR:ko04147]|transitional endoplasmic reticulum ATPase
Thraus_T5128	Protein aardvark	AARA_DICDI	28.8%	1e-08	NO_KO_DATA	NO_EC_NUMBER	NO_KO_DATA
Thraus_T4274	Histone deacetylase-like amidohydrolase {ECO:0000303|PubMed:27756124}	HDAH_PSEAE	44.083%	3.67e-66	NO_KO_DATA	NO_EC_NUMBER	NO_KO_DATA
Thraus_T800	tRNA-dihydrouridine(20) synthase [NAD(P)+]-like	DUS2L_HUMAN	41.234%	1.3e-54	K05543	1.3.1.91	Brite Hierarchies|Protein families: genetic information processing|Transfer RNA biogenesis [BR:ko03016]|tRNA-dihydrouridine synthase 2 [EC:1.3.1.91]
Thraus_T801	DNA repair protein RAD51 homolog A	RA51A_XENLA	48.515%	2.61e-16	K04482	NO_EC_NUMBER	Genetic Information Processing|Replication and repair|Homologous recombination [PATH:ko03440]|DNA repair protein RAD51	Genetic Information Processing|Replication and repair|Fanconi anemia pathway [PATH:ko03460]|DNA repair protein RAD51	Human Diseases|Cancer: overview|Pathways in cancer [PATH:ko05200]|DNA repair protein RAD51	Human Diseases|Cancer: specific types|Pancreatic cancer [PATH:ko05212]|DNA repair protein RAD51	Brite Hierarchies|Protein families: genetic information processing|Membrane trafficking [BR:ko04131]|DNA repair protein RAD51	Brite Hierarchies|Protein families: genetic information processing|Ubiquitin system [BR:ko04121]|DNA repair protein RAD51	Brite Hierarchies|Protein families: genetic information processing|DNA repair and recombination proteins [BR:ko03400]|DNA repair protein RAD51
Thraus_T802	NADH dehydrogenase [ubiquinone] iron-sulfur protein 8-A, mitochondrial	NDS8A_ARATH	60.227%	3.45e-69	K03941	7.1.1.2|1.6.99.3	Metabolism|Energy metabolism|Oxidative phosphorylation [PATH:ko00190]|NADH dehydrogenase (ubiquinone) Fe-S protein 8 [EC:7.1.1.2 1.6.99.3]	Organismal Systems|Nervous system|Retrograde endocannabinoid signaling [PATH:ko04723]|NADH dehydrogenase (ubiquinone) Fe-S protein 8 [EC:7.1.1.2 1.6.99.3]	Organismal Systems|Environmental adaptation|Thermogenesis [PATH:ko04714]|NADH dehydrogenase (ubiquinone) Fe-S protein 8 [EC:7.1.1.2 1.6.99.3]	Human Diseases|Neurodegenerative disease|Alzheimer disease [PATH:ko05010]|NADH dehydrogenase (ubiquinone) Fe-S protein 8 [EC:7.1.1.2 1.6.99.3]	Human Diseases|Neurodegenerative disease|Parkinson disease [PATH:ko05012]|NADH dehydrogenase (ubiquinone) Fe-S protein 8 [EC:7.1.1.2 1.6.99.3]	Human Diseases|Neurodegenerative disease|Huntington disease [PATH:ko05016]|NADH dehydrogenase (ubiquinone) Fe-S protein 8 [EC:7.1.1.2 1.6.99.3]	Human Diseases|Endocrine and metabolic disease|Non-alcoholic fatty liver disease (NAFLD) [PATH:ko04932]|NADH dehydrogenase (ubiquinone) Fe-S protein 8 [EC:7.1.1.2 1.6.99.3]
Thraus_T803	Arylsulfatase B	ARSB_MOUSE	31.467%	4.35e-69	K01135	3.1.6.12	Metabolism|Glycan biosynthesis and metabolism|Glycosaminoglycan degradation [PATH:ko00531]|arylsulfatase B [EC:3.1.6.12]	Cellular Processes|Transport and catabolism|Lysosome [PATH:ko04142]|arylsulfatase B [EC:3.1.6.12]
Thraus_T804	Mitochondrial inner membrane protein OXA1L	OXA1L_MOUSE	34.348%	1.93e-35	K03217	NO_EC_NUMBER	Genetic Information Processing|Folding, sorting and degradation|Protein export [PATH:ko03060]|YidC/Oxa1 family membrane protein insertase	Environmental Information Processing|Membrane transport|Bacterial secretion system [PATH:ko03070]|YidC/Oxa1 family membrane protein insertase	Cellular Processes|Cellular community - prokaryotes|Quorum sensing [PATH:ko02024]|YidC/Oxa1 family membrane protein insertase	Brite Hierarchies|Protein families: genetic information processing|Mitochondrial biogenesis [BR:ko03029]|YidC/Oxa1 family membrane protein insertase	Brite Hierarchies|Protein families: signaling and cellular processes|Secretion system [BR:ko02044]|YidC/Oxa1 family membrane protein insertase
Thraus_T805	Aurachin C monooxygenase/isomerase {ECO:0000305}	AUAG_STIAU	29.208%	3.08e-13	K21272	1.14.13.222	Metabolism|Biosynthesis of other secondary metabolites|Biosynthesis of various secondary metabolites - part 2 [PATH:ko00998]|aurachin C monooxygenase/isomerase [EC:1.14.13.222]
Thraus_T806	Chaperone protein dnaJ 2	DNAJ2_ARATH	46.825%	1.72e-77	K09503	NO_EC_NUMBER	Genetic Information Processing|Folding, sorting and degradation|Protein processing in endoplasmic reticulum [PATH:ko04141]|DnaJ homolog subfamily A member 2	Brite Hierarchies|Protein families: genetic information processing|Chaperones and folding catalysts [BR:ko03110]|DnaJ homolog subfamily A member 2	Brite Hierarchies|Protein families: genetic information processing|Mitochondrial biogenesis [BR:ko03029]|DnaJ homolog subfamily A member 2
Thraus_T807	E3 ubiquitin-protein ligase rpm-1 {ECO:0000303|PubMed:10839353}	RPM1_CAEEL	31.805%	2.36e-39	K10693	2.3.2.27	Organismal Systems|Development and regeneration|Axon regeneration [PATH:ko04361]|E3 ubiquitin-protein ligase MYCBP2 [EC:2.3.2.27]	Brite Hierarchies|Protein families: genetic information processing|Ubiquitin system [BR:ko04121]|E3 ubiquitin-protein ligase MYCBP2 [EC:2.3.2.27]
Thraus_T808	Eye-specific diacylglycerol kinase	DGK2_DROME	31.724%	1.72e-23	K00901	2.7.1.107	Metabolism|Lipid metabolism|Glycerolipid metabolism [PATH:ko00561]|diacylglycerol kinase (ATP) [EC:2.7.1.107]	Metabolism|Lipid metabolism|Glycerophospholipid metabolism [PATH:ko00564]|diacylglycerol kinase (ATP) [EC:2.7.1.107]	Environmental Information Processing|Signal transduction|Phosphatidylinositol signaling system [PATH:ko04070]|diacylglycerol kinase (ATP) [EC:2.7.1.107]	Environmental Information Processing|Signal transduction|Phospholipase D signaling pathway [PATH:ko04072]|diacylglycerol kinase (ATP) [EC:2.7.1.107]	Organismal Systems|Development and regeneration|Axon regeneration [PATH:ko04361]|diacylglycerol kinase (ATP) [EC:2.7.1.107]	Human Diseases|Cancer: overview|Choline metabolism in cancer [PATH:ko05231]|diacylglycerol kinase (ATP) [EC:2.7.1.107]
Thraus_T809	2-dehydro-3-deoxy-6-phosphogalactonate aldolase	DGOA_ECOLI	31.707%	1.83e-17	K01631	4.1.2.21	Metabolism|Carbohydrate metabolism|Galactose metabolism [PATH:ko00052]|2-dehydro-3-deoxyphosphogalactonate aldolase [EC:4.1.2.21]
Thraus_T3354	cAMP-specific 3',5'-cAMP phosphodiesterase 4	PDE4_DICDI	36.17%	6.7e-12	K13293	3.1.4.53	Metabolism|Nucleotide metabolism|Purine metabolism [PATH:ko00230]|cAMP-specific phosphodiesterase 4 [EC:3.1.4.53]	Environmental Information Processing|Signal transduction|cAMP signaling pathway [PATH:ko04024]|cAMP-specific phosphodiesterase 4 [EC:3.1.4.53]	Organismal Systems|Endocrine system|Parathyroid hormone synthesis, secretion and action [PATH:ko04928]|cAMP-specific phosphodiesterase 4 [EC:3.1.4.53]	Human Diseases|Substance dependence|Morphine addiction [PATH:ko05032]|cAMP-specific phosphodiesterase 4 [EC:3.1.4.53]
Thraus_T2702	Small nuclear ribonucleoprotein Sm D2	SMD2_SCHPO	55.556%	7.56e-27	K11096	NO_EC_NUMBER	Genetic Information Processing|Transcription|Spliceosome [PATH:ko03040]|small nuclear ribonucleoprotein D2	Brite Hierarchies|Protein families: genetic information processing|Spliceosome [BR:ko03041]|small nuclear ribonucleoprotein D2	Brite Hierarchies|Protein families: genetic information processing|DNA replication proteins [BR:ko03032]|small nuclear ribonucleoprotein D2
Thraus_T4273	Copia protein	COPIA_DROME	31.25%	4.77e-14	NO_KO_DATA	NO_EC_NUMBER	NO_KO_DATA
Thraus_T2829	Acyl-CoA-binding domain-containing protein 6	ACBD6_BOVIN	36.893%	1.78e-12	NO_KO_DATA	NO_EC_NUMBER	NO_KO_DATA
Thraus_T2828	E3 ubiquitin-protein ligase Zswim2	ZSWM2_MOUSE	30.201%	6.05e-29	K15716	2.3.2.27	Brite Hierarchies|Protein families: genetic information processing|Ubiquitin system [BR:ko04121]|E3 ubiquitin-protein ligase ZSWIM2 [EC:2.3.2.27]
Thraus_T2703	Rieske domain-containing protein	RFESD_MOUSE	40.708%	9.08e-22	NO_KO_DATA	NO_EC_NUMBER	NO_KO_DATA
Thraus_T4270	Cell division cycle 5-like protein	CDC5L_ARATH	75.362%	1.77e-31	K12860	NO_EC_NUMBER	Genetic Information Processing|Transcription|Spliceosome [PATH:ko03040]|pre-mRNA-splicing factor CDC5/CEF1	Brite Hierarchies|Protein families: genetic information processing|Spliceosome [BR:ko03041]|pre-mRNA-splicing factor CDC5/CEF1	Brite Hierarchies|Protein families: genetic information processing|DNA repair and recombination proteins [BR:ko03400]|pre-mRNA-splicing factor CDC5/CEF1
Thraus_T5456	cAMP-dependent protein kinase catalytic subunit PRKX	PRKX_MOUSE	50.289%	3.31e-56	K19584	2.7.11.11	Brite Hierarchies|Protein families: metabolism|Protein kinases [BR:ko01001]|protein kinase X [EC:2.7.11.11]
Thraus_T2821	Alpha-ketoglutarate-dependent dioxygenase alkB homolog 6	ALKB6_DANRE	37.241%	3.1e-19	K10768	1.14.11.-	Not Included in Pathway or Brite|Unclassified: metabolism|Enzymes with EC numbers|alkylated DNA repair protein alkB homolog 6 [EC:1.14.11.-]
Thraus_T2820	Exodeoxyribonuclease	EXOA_BACSU	42.435%	1.8e-58	K01142	3.1.11.2	Genetic Information Processing|Replication and repair|Base excision repair [PATH:ko03410]|exodeoxyribonuclease III [EC:3.1.11.2]	Brite Hierarchies|Protein families: genetic information processing|DNA repair and recombination proteins [BR:ko03400]|exodeoxyribonuclease III [EC:3.1.11.2]
Thraus_T2808	NEDD8-activating enzyme E1 regulatory subunit	ULA1_MOUSE	36.765%	7.93e-112	K04532	NO_EC_NUMBER	Human Diseases|Neurodegenerative disease|Alzheimer disease [PATH:ko05010]|amyloid beta precursor protein binding protein 1	Brite Hierarchies|Protein families: genetic information processing|Ubiquitin system [BR:ko04121]|amyloid beta precursor protein binding protein 1
Thraus_T2824	Phytanoyl-CoA dioxygenase, peroxisomal	PAHX_RAT	45.517%	4.37e-71	K00477	1.14.11.18	Cellular Processes|Transport and catabolism|Peroxisome [PATH:ko04146]|phytanoyl-CoA hydroxylase [EC:1.14.11.18]
Thraus_T2827	Kinesin-II 95 kDa subunit	KRP95_STRPU	54.348%	4.42e-118	NO_KO_DATA	NO_EC_NUMBER	NO_KO_DATA
Thraus_T2826	Phytanoyl-CoA dioxygenase, peroxisomal	PAHX_RAT	44.33%	1.83e-46	K00477	1.14.11.18	Cellular Processes|Transport and catabolism|Peroxisome [PATH:ko04146]|phytanoyl-CoA hydroxylase [EC:1.14.11.18]
Thraus_T5583	Dynein assembly factor 5, axonemal {ECO:0000250|UniProtKB:Q86Y56}	DAAF5_MOUSE	28.571%	1.38e-29	K19759	NO_EC_NUMBER	Brite Hierarchies|Protein families: signaling and cellular processes|Cytoskeleton proteins [BR:ko04812]|dynein assembly factor 5, axonemal
Thraus_T5077	Cilia- and flagella-associated protein 65 {ECO:0000305}	CFA65_CHLRE	29.273%	1.93e-139	NO_KO_DATA	NO_EC_NUMBER	NO_KO_DATA
Thraus_T5581	Guanine nucleotide exchange factor VAV2	VAV2_HUMAN	84.211%	4.26e-06	K05730	NO_EC_NUMBER	Environmental Information Processing|Signal transduction|Rap1 signaling pathway [PATH:ko04015]|guanine nucleotide exchange factor VAV	Environmental Information Processing|Signal transduction|cAMP signaling pathway [PATH:ko04024]|guanine nucleotide exchange factor VAV	Cellular Processes|Cellular community - eukaryotes|Focal adhesion [PATH:ko04510]|guanine nucleotide exchange factor VAV	Cellular Processes|Cell motility|Regulation of actin cytoskeleton [PATH:ko04810]|guanine nucleotide exchange factor VAV	Organismal Systems|Immune system|Natural killer cell mediated cytotoxicity [PATH:ko04650]|guanine nucleotide exchange factor VAV	Organismal Systems|Immune system|T cell receptor signaling pathway [PATH:ko04660]|guanine nucleotide exchange factor VAV	Organismal Systems|Immune system|B cell receptor signaling pathway [PATH:ko04662]|guanine nucleotide exchange factor VAV	Organismal Systems|Immune system|Fc epsilon RI signaling pathway [PATH:ko04664]|guanine nucleotide exchange factor VAV	Organismal Systems|Immune system|Fc gamma R-mediated phagocytosis [PATH:ko04666]|guanine nucleotide exchange factor VAV	Organismal Systems|Immune system|Leukocyte transendothelial migration [PATH:ko04670]|guanine nucleotide exchange factor VAV	Organismal Systems|Immune system|Chemokine signaling pathway [PATH:ko04062]|guanine nucleotide exchange factor VAV	Human Diseases|Cancer: overview|Proteoglycans in cancer [PATH:ko05205]|guanine nucleotide exchange factor VAV	Human Diseases|Infectious disease: bacterial|Yersinia infection [PATH:ko05135]|guanine nucleotide exchange factor VAV
Thraus_T5587	UPF0489 protein C5orf22 homolog	CE022_XENLA	41.121%	3.92e-21	NO_KO_DATA	NO_EC_NUMBER	NO_KO_DATA
Thraus_T5238	Probable sugar phosphate/phosphate translocator At5g11230	PT511_ARATH	31.707%	4e-33	NO_KO_DATA	NO_EC_NUMBER	NO_KO_DATA
Thraus_T5585	Glucuronokinase 1	GLAK1_ARATH	48.148%	1.61e-88	K16190	2.7.1.43	Metabolism|Carbohydrate metabolism|Pentose and glucuronate interconversions [PATH:ko00040]|glucuronokinase [EC:2.7.1.43]	Metabolism|Carbohydrate metabolism|Ascorbate and aldarate metabolism [PATH:ko00053]|glucuronokinase [EC:2.7.1.43]	Metabolism|Carbohydrate metabolism|Amino sugar and nucleotide sugar metabolism [PATH:ko00520]|glucuronokinase [EC:2.7.1.43]
Thraus_T4696	Scavenger receptor class B member 1	SCRB1_HUMAN	24.228%	4.51e-22	K13885	NO_EC_NUMBER	Cellular Processes|Transport and catabolism|Phagosome [PATH:ko04145]|scavenger receptor class B, member 1	Organismal Systems|Endocrine system|Ovarian steroidogenesis [PATH:ko04913]|scavenger receptor class B, member 1	Organismal Systems|Endocrine system|Aldosterone synthesis and secretion [PATH:ko04925]|scavenger receptor class B, member 1	Organismal Systems|Endocrine system|Cortisol synthesis and secretion [PATH:ko04927]|scavenger receptor class B, member 1	Organismal Systems|Digestive system|Bile secretion [PATH:ko04976]|scavenger receptor class B, member 1	Organismal Systems|Digestive system|Fat digestion and absorption [PATH:ko04975]|scavenger receptor class B, member 1	Organismal Systems|Digestive system|Cholesterol metabolism [PATH:ko04979]|scavenger receptor class B, member 1	Organismal Systems|Digestive system|Vitamin digestion and absorption [PATH:ko04977]|scavenger receptor class B, member 1	Human Diseases|Endocrine and metabolic disease|Cushing syndrome [PATH:ko04934]|scavenger receptor class B, member 1	Human Diseases|Infectious disease: viral|Hepatitis C [PATH:ko05160]|scavenger receptor class B, member 1	Brite Hierarchies|Protein families: genetic information processing|Membrane trafficking [BR:ko04131]|scavenger receptor class B, member 1	Brite Hierarchies|Protein families: signaling and cellular processes|Exosome [BR:ko04147]|scavenger receptor class B, member 1
Thraus_T2915	Exportin-1	XPO1_SCHPO	49.5%	2.13e-53	NO_KO_DATA	NO_EC_NUMBER	NO_KO_DATA
Thraus_T2914	Putative 4-hydroxy-4-methyl-2-oxoglutarate aldolase	RRAAH_LARHH	53.165%	2.71e-43	K02553	NO_EC_NUMBER	Brite Hierarchies|Protein families: genetic information processing|Messenger RNA biogenesis [BR:ko03019]|regulator of ribonuclease activity A
Thraus_T5237	Electron transfer flavoprotein subunit beta {ECO:0000305}	ETFB_MOUSE	63.514%	1.58e-80	K03521	NO_EC_NUMBER	Not Included in Pathway or Brite|Unclassified: metabolism|Energy metabolism|electron transfer flavoprotein beta subunit
Thraus_T2916	Small glutamine-rich tetratricopeptide repeat-containing protein 2	SGT2_SCHPO	47.917%	1.48e-17	NO_KO_DATA	NO_EC_NUMBER	NO_KO_DATA
Thraus_T2911	Putative glucose-6-phosphate 1-epimerase {ECO:0000250|UniProtKB:Q03161}	AAPC_CENCI	33.217%	2.61e-40	NO_KO_DATA	NO_EC_NUMBER	NO_KO_DATA
Thraus_T2910	Probable protease SohB	SOHB_SHIFL	53.723%	1.88e-60	K04774	3.4.21.-	Brite Hierarchies|Protein families: metabolism|Peptidases and inhibitors [BR:ko01002]|serine protease SohB [EC:3.4.21.-]
Thraus_T2913	50S ribosomal protein L3-2, mitochondrial {ECO:0000305}	RK3B_ARATH	43.162%	5.04e-51	K02906	NO_EC_NUMBER	Genetic Information Processing|Translation|Ribosome [PATH:ko03010]|large subunit ribosomal protein L3	Brite Hierarchies|Protein families: genetic information processing|Ribosome [BR:ko03011]|large subunit ribosomal protein L3
Thraus_T2912	Elongation factor Ts {ECO:0000255|HAMAP-Rule:MF_00050}	EFTS_RHOPT	36.334%	2.35e-40	K02357	NO_EC_NUMBER	Brite Hierarchies|Protein families: genetic information processing|Translation factors [BR:ko03012]|elongation factor Ts	Brite Hierarchies|Protein families: genetic information processing|Mitochondrial biogenesis [BR:ko03029]|elongation factor Ts
Thraus_T1245	Ulvan-active sulfatase {ECO:0000305}	PLH11_FORAG	28.968%	1.62e-21	NO_KO_DATA	NO_EC_NUMBER	NO_KO_DATA
Thraus_T1246	Ribonucleoside-diphosphate reductase subunit M2	RIR2_DANRE	55.764%	9.81e-137	K10808	1.17.4.1	Metabolism|Nucleotide metabolism|Purine metabolism [PATH:ko00230]|ribonucleoside-diphosphate reductase subunit M2 [EC:1.17.4.1]	Metabolism|Nucleotide metabolism|Pyrimidine metabolism [PATH:ko00240]|ribonucleoside-diphosphate reductase subunit M2 [EC:1.17.4.1]	Metabolism|Metabolism of other amino acids|Glutathione metabolism [PATH:ko00480]|ribonucleoside-diphosphate reductase subunit M2 [EC:1.17.4.1]	Metabolism|Xenobiotics biodegradation and metabolism|Drug metabolism - other enzymes [PATH:ko00983]|ribonucleoside-diphosphate reductase subunit M2 [EC:1.17.4.1]	Cellular Processes|Cell growth and death|p53 signaling pathway [PATH:ko04115]|ribonucleoside-diphosphate reductase subunit M2 [EC:1.17.4.1]	Brite Hierarchies|Protein families: genetic information processing|DNA repair and recombination proteins [BR:ko03400]|ribonucleoside-diphosphate reductase subunit M2 [EC:1.17.4.1]
Thraus_T1247	Cullin-associated NEDD8-dissociated protein 1	CAND1_DICDI	39.474%	1.28e-34	K17263	NO_EC_NUMBER	Brite Hierarchies|Protein families: genetic information processing|Ubiquitin system [BR:ko04121]|cullin-associated NEDD8-dissociated protein 1	Brite Hierarchies|Protein families: signaling and cellular processes|Exosome [BR:ko04147]|cullin-associated NEDD8-dissociated protein 1
Thraus_T1240	Ubiquinone biosynthesis protein COQ4 homolog, mitochondrial {ECO:0000255|HAMAP-Rule:MF_03111}	COQ4_HUMAN	35.145%	1.23e-47	K18586	NO_EC_NUMBER	Not Included in Pathway or Brite|Unclassified: metabolism|Cofactor metabolism|ubiquinone biosynthesis protein COQ4
Thraus_T1241	Tryptophan--tRNA ligase, cytoplasmic {ECO:0000305}	SYWC_HUMAN	63.95%	1.81e-148	K01867	6.1.1.2	Genetic Information Processing|Translation|Aminoacyl-tRNA biosynthesis [PATH:ko00970]|tryptophanyl-tRNA synthetase [EC:6.1.1.2]	Brite Hierarchies|Protein families: metabolism|Amino acid related enzymes [BR:ko01007]|tryptophanyl-tRNA synthetase [EC:6.1.1.2]	Brite Hierarchies|Protein families: genetic information processing|Transfer RNA biogenesis [BR:ko03016]|tryptophanyl-tRNA synthetase [EC:6.1.1.2]
Thraus_T1242	DNA primase small subunit	PRI1_MOUSE	36.288%	2.33e-69	K02684	2.7.7.102	Genetic Information Processing|Replication and repair|DNA replication [PATH:ko03030]|DNA primase small subunit [EC:2.7.7.102]	Brite Hierarchies|Protein families: genetic information processing|DNA replication proteins [BR:ko03032]|DNA primase small subunit [EC:2.7.7.102]
Thraus_T1243	Small nuclear ribonucleoprotein SmD3b {ECO:0000305}	SMD3B_ARATH	37.879%	4.27e-14	K11088	NO_EC_NUMBER	Genetic Information Processing|Transcription|Spliceosome [PATH:ko03040]|small nuclear ribonucleoprotein D3	Cellular Processes|Transport and catabolism|Mitophagy - yeast [PATH:ko04139]|small nuclear ribonucleoprotein D3	Human Diseases|Immune disease|Systemic lupus erythematosus [PATH:ko05322]|small nuclear ribonucleoprotein D3	Brite Hierarchies|Protein families: genetic information processing|Spliceosome [BR:ko03041]|small nuclear ribonucleoprotein D3	Brite Hierarchies|Protein families: genetic information processing|DNA replication proteins [BR:ko03032]|small nuclear ribonucleoprotein D3
Thraus_T4175	Coatomer subunit zeta-1	COPZ1_BOVIN	45.294%	1.94e-34	K20472	NO_EC_NUMBER	Brite Hierarchies|Protein families: genetic information processing|Membrane trafficking [BR:ko04131]|coatomer subunit zeta
Thraus_T1249	Long-chain fatty acid transport protein 4 {ECO:0000305}	S27A4_HUMAN	43.541%	1.35e-102	K08745	6.2.1.-	Organismal Systems|Endocrine system|PPAR signaling pathway [PATH:ko03320]|solute carrier family 27 (fatty acid transporter), member 1/4 [EC:6.2.1.-]	Human Diseases|Endocrine and metabolic disease|Insulin resistance [PATH:ko04931]|solute carrier family 27 (fatty acid transporter), member 1/4 [EC:6.2.1.-]	Brite Hierarchies|Protein families: metabolism|Lipid biosynthesis proteins [BR:ko01004]|solute carrier family 27 (fatty acid transporter), member 1/4 [EC:6.2.1.-]	Brite Hierarchies|Protein families: signaling and cellular processes|Transporters [BR:ko02000]|solute carrier family 27 (fatty acid transporter), member 1/4 [EC:6.2.1.-]
Thraus_T4174	Glycogen synthase kinase-3 homolog MsK-2	MSK2_MEDSA	49.211%	1.42e-94	NO_KO_DATA	NO_EC_NUMBER	NO_KO_DATA
Thraus_T4090	BTB/POZ domain-containing protein KCTD6	KCTD6_DANRE	37.121%	2.78e-12	K21916	NO_EC_NUMBER	Brite Hierarchies|Protein families: genetic information processing|Ubiquitin system [BR:ko04121]|BTB/POZ domain-containing protein KCTD6
Thraus_T3881	Chaperone protein DnaJ {ECO:0000255|HAMAP-Rule:MF_01152}	DNAJ_LISW6	48.649%	1.71e-15	K03686	NO_EC_NUMBER	Brite Hierarchies|Protein families: genetic information processing|Chaperones and folding catalysts [BR:ko03110]|molecular chaperone DnaJ	Brite Hierarchies|Protein families: genetic information processing|Mitochondrial biogenesis [BR:ko03029]|molecular chaperone DnaJ
Thraus_T4176	TRAF3-interacting protein 1	MIPT3_DANRE	44.444%	1.79e-18	K19680	NO_EC_NUMBER	Brite Hierarchies|Protein families: genetic information processing|Chromosome and associated proteins [BR:ko03036]|TRAF3-interacting protein 1
Thraus_T5042	Probable alpha,alpha-trehalose-phosphate synthase [UDP-forming] 9	TPS9_ARATH	28.839%	6.04e-53	K16055	2.4.1.15|3.1.3.12	Metabolism|Carbohydrate metabolism|Starch and sucrose metabolism [PATH:ko00500]|trehalose 6-phosphate synthase/phosphatase [EC:2.4.1.15 3.1.3.12]	Brite Hierarchies|Protein families: metabolism|Glycosyltransferases [BR:ko01003]|trehalose 6-phosphate synthase/phosphatase [EC:2.4.1.15 3.1.3.12]
Thraus_T4070	Eukaryotic translation initiation factor isoform 4E-2	IF4E2_WHEAT	32%	4.6e-17	NO_KO_DATA	NO_EC_NUMBER	NO_KO_DATA
Thraus_T3883	DUF21 domain-containing protein At1g47330	Y1733_ARATH	37.5%	1.34e-69	K16302	NO_EC_NUMBER	Brite Hierarchies|Protein families: signaling and cellular processes|Transporters [BR:ko02000]|metal transporter CNNM
Thraus_T4188	Kinesin-related protein 1	KIF1_DICDI	50%	7.06e-45	K10392	NO_EC_NUMBER	Brite Hierarchies|Protein families: signaling and cellular processes|Cytoskeleton proteins [BR:ko04812]|kinesin family member 1
Thraus_T4178	30S ribosomal protein S5 {ECO:0000255|HAMAP-Rule:MF_01307}	RS5_ERYLH	36.667%	9.51e-18	K02988	NO_EC_NUMBER	Genetic Information Processing|Translation|Ribosome [PATH:ko03010]|small subunit ribosomal protein S5	Brite Hierarchies|Protein families: genetic information processing|Ribosome [BR:ko03011]|small subunit ribosomal protein S5
Thraus_T4184	Rhodanese-like domain-containing protein 6	STR6_ARATH	46.667%	2.49e-27	NO_KO_DATA	NO_EC_NUMBER	NO_KO_DATA
Thraus_T4186	Transposon Ty3-I Gag-Pol polyprotein	YI31B_YEAST	24.147%	1.28e-13	K07497	NO_EC_NUMBER	Not Included in Pathway or Brite|Unclassified: genetic information processing|Replication and repair|putative transposase
Thraus_T3930	Sodium-dependent phosphate transport protein 2B	NPT2B_BOVIN	54.483%	7.33e-24	K14683	NO_EC_NUMBER	Organismal Systems|Endocrine system|Parathyroid hormone synthesis, secretion and action [PATH:ko04928]|solute carrier family 34 (sodium-dependent phosphate cotransporter)	Organismal Systems|Digestive system|Mineral absorption [PATH:ko04978]|solute carrier family 34 (sodium-dependent phosphate cotransporter)	Brite Hierarchies|Protein families: signaling and cellular processes|Transporters [BR:ko02000]|solute carrier family 34 (sodium-dependent phosphate cotransporter)	Brite Hierarchies|Protein families: signaling and cellular processes|Exosome [BR:ko04147]|solute carrier family 34 (sodium-dependent phosphate cotransporter)
Thraus_T4072	Actin-like protein arp6	ARP6_SCHPO	52.564%	5.49e-22	K11662	NO_EC_NUMBER	Brite Hierarchies|Protein families: genetic information processing|Chromosome and associated proteins [BR:ko03036]|actin-related protein 6	Brite Hierarchies|Protein families: signaling and cellular processes|Cytoskeleton proteins [BR:ko04812]|actin-related protein 6
Thraus_T4182	DNA polymerase zeta catalytic subunit	REV3L_MOUSE	30.184%	2.07e-48	K02350	2.7.7.7	Genetic Information Processing|Replication and repair|Fanconi anemia pathway [PATH:ko03460]|DNA polymerase zeta [EC:2.7.7.7]	Human Diseases|Drug resistance: antineoplastic|Platinum drug resistance [PATH:ko01524]|DNA polymerase zeta [EC:2.7.7.7]	Brite Hierarchies|Protein families: genetic information processing|DNA repair and recombination proteins [BR:ko03400]|DNA polymerase zeta [EC:2.7.7.7]
Thraus_T4183	Serine--tRNA ligase, chloroplastic/mitochondrial {ECO:0000305}	SYSM_ARATH	45.89%	9.3e-83	K01875	6.1.1.11	Genetic Information Processing|Translation|Aminoacyl-tRNA biosynthesis [PATH:ko00970]|seryl-tRNA synthetase [EC:6.1.1.11]	Brite Hierarchies|Protein families: metabolism|Amino acid related enzymes [BR:ko01007]|seryl-tRNA synthetase [EC:6.1.1.11]	Brite Hierarchies|Protein families: genetic information processing|Transfer RNA biogenesis [BR:ko03016]|seryl-tRNA synthetase [EC:6.1.1.11]
Thraus_T4290	Calcium/calmodulin-dependent protein kinase type 1 {ECO:0000305}	CAMKI_MACNP	45.847%	2.61e-92	NO_KO_DATA	NO_EC_NUMBER	NO_KO_DATA
Thraus_T5058	Solute carrier family 25 member 40	S2540_DANRE	48.636%	1.3e-58	K15119	NO_EC_NUMBER	Brite Hierarchies|Protein families: signaling and cellular processes|Transporters [BR:ko02000]|solute carrier family 25, member 39/40
Thraus_T4292	Ras-related protein Rab-23	RAB23_MOUSE	37.725%	2.89e-36	NO_KO_DATA	NO_EC_NUMBER	NO_KO_DATA
Thraus_T4073	Pleckstrin homology domain-containing family D member 1	PLHD1_HUMAN	36.913%	6.93e-25	NO_KO_DATA	NO_EC_NUMBER	NO_KO_DATA
Thraus_T4091	Homogentisate 1,2-dioxygenase {ECO:0000255|HAMAP-Rule:MF_00334}	HGD_XANAC	46.491%	9.38e-104	K00451	1.13.11.5	Metabolism|Amino acid metabolism|Tyrosine metabolism [PATH:ko00350]|homogentisate 1,2-dioxygenase [EC:1.13.11.5]	Metabolism|Xenobiotics biodegradation and metabolism|Styrene degradation [PATH:ko00643]|homogentisate 1,2-dioxygenase [EC:1.13.11.5]
Thraus_T4295	Protein CREG1	CREG1_CHICK	37.222%	6.51e-31	NO_KO_DATA	NO_EC_NUMBER	NO_KO_DATA
Thraus_T4296	RutC family protein HI_1627	Y1627_HAEIN	42.241%	6.04e-17	NO_KO_DATA	NO_EC_NUMBER	NO_KO_DATA
Thraus_T4297	Dynein light chain Tctex-type	DYLT_DICDI	27.826%	7.94e-07	K10420	NO_EC_NUMBER	Brite Hierarchies|Protein families: signaling and cellular processes|Cytoskeleton proteins [BR:ko04812]|dynein light chain Tctex-type 1
Thraus_T4298	Retinal rod rhodopsin-sensitive cGMP 3',5'-cyclic phosphodiesterase subunit delta	PDE6D_CANLF	59.848%	1.29e-51	K13758	NO_EC_NUMBER	Metabolism|Nucleotide metabolism|Purine metabolism [PATH:ko00230]|retinal rod rhodopsin-sensitive cGMP 3',5'-cyclic phosphodiesterase subunit delta	Brite Hierarchies|Protein families: genetic information processing|Membrane trafficking [BR:ko04131]|retinal rod rhodopsin-sensitive cGMP 3',5'-cyclic phosphodiesterase subunit delta
Thraus_T4074	Pre-mRNA-splicing factor ATP-dependent RNA helicase DHX16	DHX16_PIG	49.254%	1.81e-16	K12813	3.6.4.13	Genetic Information Processing|Transcription|Spliceosome [PATH:ko03040]|pre-mRNA-splicing factor ATP-dependent RNA helicase DHX16 [EC:3.6.4.13]	Brite Hierarchies|Protein families: genetic information processing|Spliceosome [BR:ko03041]|pre-mRNA-splicing factor ATP-dependent RNA helicase DHX16 [EC:3.6.4.13]
Thraus_T5053	Serine/threonine-protein phosphatase 4 catalytic subunit	PP4C_XENTR	76.547%	4.6e-175	K15423	3.1.3.16	Organismal Systems|Endocrine system|Glucagon signaling pathway [PATH:ko04922]|serine/threonine-protein phosphatase 4 catalytic subunit [EC:3.1.3.16]	Brite Hierarchies|Protein families: metabolism|Protein phosphatases and associated proteins [BR:ko01009]|serine/threonine-protein phosphatase 4 catalytic subunit [EC:3.1.3.16]	Brite Hierarchies|Protein families: genetic information processing|DNA repair and recombination proteins [BR:ko03400]|serine/threonine-protein phosphatase 4 catalytic subunit [EC:3.1.3.16]
Thraus_T5052	Deoxyhypusine hydroxylase {ECO:0000255|HAMAP-Rule:MF_03101}	DOHH_DROPS	50%	3.73e-73	K06072	1.14.99.29	Not Included in Pathway or Brite|Unclassified: metabolism|Enzymes with EC numbers|deoxyhypusine monooxygenase [EC:1.14.99.29]
Thraus_T5055	Histone-lysine N-methyltransferase EHMT2	EHMT2_MOUSE	34.247%	1.25e-17	K11420	2.1.1.355	Metabolism|Amino acid metabolism|Lysine degradation [PATH:ko00310]|[histone H3]-lysine9 N-trimethyltransferase EHMT [EC:2.1.1.355]	Organismal Systems|Aging|Longevity regulating pathway [PATH:ko04211]|[histone H3]-lysine9 N-trimethyltransferase EHMT [EC:2.1.1.355]	Brite Hierarchies|Protein families: genetic information processing|Chromosome and associated proteins [BR:ko03036]|[histone H3]-lysine9 N-trimethyltransferase EHMT [EC:2.1.1.355]
Thraus_T5054	15-hydroxyprostaglandin dehydrogenase [NAD(+)]	PGDH_MOUSE	34.959%	1.65e-34	K00069	1.1.1.141	Human Diseases|Cancer: overview|Transcriptional misregulation in cancer [PATH:ko05202]|15-hydroxyprostaglandin dehydrogenase (NAD) [EC:1.1.1.141]	Brite Hierarchies|Protein families: signaling and cellular processes|Exosome [BR:ko04147]|15-hydroxyprostaglandin dehydrogenase (NAD) [EC:1.1.1.141]
Thraus_T5057	Histone acetyltransferase type B subunit 2	HAT2_SCHPO	28.689%	1.23e-06	K10752	NO_EC_NUMBER	Cellular Processes|Cell growth and death|Cellular senescence [PATH:ko04218]|histone-binding protein RBBP4	Brite Hierarchies|Protein families: genetic information processing|Chromosome and associated proteins [BR:ko03036]|histone-binding protein RBBP4
Thraus_T4075	DEAD-box ATP-dependent RNA helicase 21	RH21_ORYSJ	50.973%	6.39e-71	K12858	3.6.4.13	Genetic Information Processing|Transcription|Spliceosome [PATH:ko03040]|ATP-dependent RNA helicase DDX23/PRP28 [EC:3.6.4.13]	Brite Hierarchies|Protein families: genetic information processing|Spliceosome [BR:ko03041]|ATP-dependent RNA helicase DDX23/PRP28 [EC:3.6.4.13]
Thraus_T1020	Vacuolar protein sorting-associated protein 28 homolog 2	VP282_ARATH	47.619%	3.52e-51	K12184	NO_EC_NUMBER	Cellular Processes|Transport and catabolism|Endocytosis [PATH:ko04144]|ESCRT-I complex subunit VPS28	Brite Hierarchies|Protein families: genetic information processing|Membrane trafficking [BR:ko04131]|ESCRT-I complex subunit VPS28	Brite Hierarchies|Protein families: signaling and cellular processes|Exosome [BR:ko04147]|ESCRT-I complex subunit VPS28
Thraus_T1021	Probable E3 ubiquitin-protein ligase HERC4	HERC4_MOUSE	40.625%	1.74e-16	K10615	2.3.2.26	Genetic Information Processing|Folding, sorting and degradation|Ubiquitin mediated proteolysis [PATH:ko04120]|E3 ubiquitin-protein ligase HERC4 [EC:2.3.2.26]	Brite Hierarchies|Protein families: genetic information processing|Ubiquitin system [BR:ko04121]|E3 ubiquitin-protein ligase HERC4 [EC:2.3.2.26]
Thraus_T1022	Eukaryotic translation initiation factor 1A, X-chromosomal	IF1AX_PONAB	85.526%	1.18e-42	K03236	NO_EC_NUMBER	Genetic Information Processing|Translation|RNA transport [PATH:ko03013]|translation initiation factor 1A	Brite Hierarchies|Protein families: genetic information processing|Translation factors [BR:ko03012]|translation initiation factor 1A
Thraus_T1023	Interferon-induced, double-stranded RNA-activated protein kinase	E2AK2_RAT	29.143%	3.23e-12	K16195	2.7.11.1	Genetic Information Processing|Folding, sorting and degradation|Protein processing in endoplasmic reticulum [PATH:ko04141]|eukaryotic translation initiation factor 2-alpha kinase 2 [EC:2.7.11.1]	Cellular Processes|Cell growth and death|Necroptosis [PATH:ko04217]|eukaryotic translation initiation factor 2-alpha kinase 2 [EC:2.7.11.1]	Human Diseases|Cancer: overview|Viral carcinogenesis [PATH:ko05203]|eukaryotic translation initiation factor 2-alpha kinase 2 [EC:2.7.11.1]	Human Diseases|Infectious disease: viral|Measles [PATH:ko05162]|eukaryotic translation initiation factor 2-alpha kinase 2 [EC:2.7.11.1]	Human Diseases|Infectious disease: viral|Influenza A [PATH:ko05164]|eukaryotic translation initiation factor 2-alpha kinase 2 [EC:2.7.11.1]	Human Diseases|Infectious disease: viral|Hepatitis C [PATH:ko05160]|eukaryotic translation initiation factor 2-alpha kinase 2 [EC:2.7.11.1]	Human Diseases|Infectious disease: viral|Herpes simplex virus 1 infection [PATH:ko05168]|eukaryotic translation initiation factor 2-alpha kinase 2 [EC:2.7.11.1]	Human Diseases|Infectious disease: viral|Kaposi sarcoma-associated herpesvirus infection [PATH:ko05167]|eukaryotic translation initiation factor 2-alpha kinase 2 [EC:2.7.11.1]	Human Diseases|Infectious disease: viral|Epstein-Barr virus infection [PATH:ko05169]|eukaryotic translation initiation factor 2-alpha kinase 2 [EC:2.7.11.1]	Human Diseases|Infectious disease: viral|Human papillomavirus infection [PATH:ko05165]|eukaryotic translation initiation factor 2-alpha kinase 2 [EC:2.7.11.1]	Brite Hierarchies|Protein families: metabolism|Protein kinases [BR:ko01001]|eukaryotic translation initiation factor 2-alpha kinase 2 [EC:2.7.11.1]	Brite Hierarchies|Protein families: metabolism|Protein phosphatases and associated proteins [BR:ko01009]|eukaryotic translation initiation factor 2-alpha kinase 2 [EC:2.7.11.1]	Brite Hierarchies|Protein families: genetic information processing|Messenger RNA biogenesis [BR:ko03019]|eukaryotic translation initiation factor 2-alpha kinase 2 [EC:2.7.11.1]
Thraus_T1024	Aconitate hydratase B {ECO:0000250|UniProtKB:P36683}	ACNB_PSEAE	74.238%	0	K01682	4.2.1.3|4.2.1.99	Metabolism|Carbohydrate metabolism|Citrate cycle (TCA cycle) [PATH:ko00020]|aconitate hydratase 2 / 2-methylisocitrate dehydratase [EC:4.2.1.3 4.2.1.99]	Metabolism|Carbohydrate metabolism|Glyoxylate and dicarboxylate metabolism [PATH:ko00630]|aconitate hydratase 2 / 2-methylisocitrate dehydratase [EC:4.2.1.3 4.2.1.99]	Metabolism|Carbohydrate metabolism|Propanoate metabolism [PATH:ko00640]|aconitate hydratase 2 / 2-methylisocitrate dehydratase [EC:4.2.1.3 4.2.1.99]	Metabolism|Energy metabolism|Carbon fixation pathways in prokaryotes [PATH:ko00720]|aconitate hydratase 2 / 2-methylisocitrate dehydratase [EC:4.2.1.3 4.2.1.99]
Thraus_T1025	Tubulin polyglutamylase ttll-4	TTLL4_CAEBR	30.415%	1.08e-23	K16601	6.-.-.-	Brite Hierarchies|Protein families: signaling and cellular processes|Cytoskeleton proteins [BR:ko04812]|tubulin polyglutamylase TTLL4 [EC:6.-.-.-]
Thraus_T1026	ATP-dependent RNA helicase mak5	MAK5_ASPNC	29.188%	6.38e-29	K14805	3.6.4.13	Brite Hierarchies|Protein families: genetic information processing|Ribosome biogenesis [BR:ko03009]|ATP-dependent RNA helicase DDX24/MAK5 [EC:3.6.4.13]
Thraus_T1027	Serine/threonine-protein kinase mph1	MPH1L_SCHPO	45.817%	3e-57	K08866	2.7.12.1	Cellular Processes|Cell growth and death|Cell cycle [PATH:ko04110]|serine/threonine-protein kinase TTK/MPS1 [EC:2.7.12.1]	Cellular Processes|Cell growth and death|Cell cycle - yeast [PATH:ko04111]|serine/threonine-protein kinase TTK/MPS1 [EC:2.7.12.1]	Brite Hierarchies|Protein families: metabolism|Protein kinases [BR:ko01001]|serine/threonine-protein kinase TTK/MPS1 [EC:2.7.12.1]	Brite Hierarchies|Protein families: genetic information processing|Chromosome and associated proteins [BR:ko03036]|serine/threonine-protein kinase TTK/MPS1 [EC:2.7.12.1]
Thraus_T1028	Twitchin {ECO:0000303|PubMed:7190524}	UNC22_CAEEL	27.895%	2.32e-07	NO_KO_DATA	NO_EC_NUMBER	NO_KO_DATA
Thraus_T1029	Cullin-1	CUL1_ARATH	36.89%	1.53e-59	K03347	NO_EC_NUMBER	Genetic Information Processing|Folding, sorting and degradation|Protein processing in endoplasmic reticulum [PATH:ko04141]|cullin 1	Genetic Information Processing|Folding, sorting and degradation|Ubiquitin mediated proteolysis [PATH:ko04120]|cullin 1	Environmental Information Processing|Signal transduction|Wnt signaling pathway [PATH:ko04310]|cullin 1	Environmental Information Processing|Signal transduction|Hedgehog signaling pathway [PATH:ko04340]|cullin 1	Environmental Information Processing|Signal transduction|Hedgehog signaling pathway - fly [PATH:ko04341]|cullin 1	Environmental Information Processing|Signal transduction|TGF-beta signaling pathway [PATH:ko04350]|cullin 1	Cellular Processes|Cell growth and death|Cell cycle [PATH:ko04110]|cullin 1	Cellular Processes|Cell growth and death|Cell cycle - yeast [PATH:ko04111]|cullin 1	Cellular Processes|Cell growth and death|Oocyte meiosis [PATH:ko04114]|cullin 1	Organismal Systems|Environmental adaptation|Circadian rhythm [PATH:ko04710]|cullin 1	Human Diseases|Cancer: overview|Pathways in cancer [PATH:ko05200]|cullin 1	Human Diseases|Infectious disease: bacterial|Shigellosis [PATH:ko05131]|cullin 1	Human Diseases|Infectious disease: viral|Human immunodeficiency virus 1 infection [PATH:ko05170]|cullin 1	Brite Hierarchies|Protein families: genetic information processing|Ubiquitin system [BR:ko04121]|cullin 1
Thraus_T4058	Putative protease Do-like 14	DGP14_ARATH	46.371%	5.02e-71	NO_KO_DATA	NO_EC_NUMBER	NO_KO_DATA
Thraus_T5078	Putative sodium-coupled neutral amino acid transporter 11	S38AB_RAT	30.501%	3.77e-59	NO_KO_DATA	NO_EC_NUMBER	NO_KO_DATA
Thraus_T1977	Cycloartenol synthase	CAS1_DICDI	42.797%	0	K01852	5.4.99.7	Metabolism|Lipid metabolism|Steroid biosynthesis [PATH:ko00100]|lanosterol synthase [EC:5.4.99.7]
Thraus_T1974	DnaJ homolog subfamily C member 27	DJC27_RAT	54.321%	8.63e-57	K19372	NO_EC_NUMBER	Brite Hierarchies|Protein families: genetic information processing|Chaperones and folding catalysts [BR:ko03110]|DnaJ homolog subfamily C member 27
Thraus_T3248	ATP-dependent dethiobiotin synthetase BioD {ECO:0000255|HAMAP-Rule:MF_00336}	BIOD_CALS8	26.016%	2.13e-07	K01935	6.3.3.3	Metabolism|Metabolism of cofactors and vitamins|Biotin metabolism [PATH:ko00780]|dethiobiotin synthetase [EC:6.3.3.3]
Thraus_T3249	Lipase maturation factor 2	LMF2_XENLA	56.757%	7.09e-32	NO_KO_DATA	NO_EC_NUMBER	NO_KO_DATA
Thraus_T3246	Trace amine-associated receptor 7e	TAA7E_MOUSE	27.402%	3.78e-12	K05051	NO_EC_NUMBER	Environmental Information Processing|Signaling molecules and interaction|Neuroactive ligand-receptor interaction [PATH:ko04080]|trace amine associated receptor	Brite Hierarchies|Protein families: signaling and cellular processes|G protein-coupled receptors [BR:ko04030]|trace amine associated receptor
Thraus_T3247	Efflux pump azaK {ECO:0000303|PubMed:22921072}	AZAK_ASPNA	22.901%	3.67e-06	NO_KO_DATA	NO_EC_NUMBER	NO_KO_DATA
Thraus_T3244	Probable protein phosphatase 2C 72	P2C72_ARATH	23.313%	1.87e-08	NO_KO_DATA	NO_EC_NUMBER	NO_KO_DATA
Thraus_T1975	Kinesin heavy chain	KINH_NEUCR	57.143%	1.89e-52	K10396	NO_EC_NUMBER	Cellular Processes|Transport and catabolism|Endocytosis [PATH:ko04144]|kinesin family member 5	Organismal Systems|Nervous system|Dopaminergic synapse [PATH:ko04728]|kinesin family member 5	Brite Hierarchies|Protein families: genetic information processing|Membrane trafficking [BR:ko04131]|kinesin family member 5	Brite Hierarchies|Protein families: signaling and cellular processes|Cytoskeleton proteins [BR:ko04812]|kinesin family member 5	Brite Hierarchies|Protein families: signaling and cellular processes|Exosome [BR:ko04147]|kinesin family member 5
Thraus_T3242	Probable polyamine transporter At3g19553	PHSD_ARATH	33.784%	4.24e-65	NO_KO_DATA	NO_EC_NUMBER	NO_KO_DATA
Thraus_T3240	Transketolase 1	TKT1_YEAST	51.645%	0	K00615	2.2.1.1	Metabolism|Carbohydrate metabolism|Pentose phosphate pathway [PATH:ko00030]|transketolase [EC:2.2.1.1]	Metabolism|Energy metabolism|Carbon fixation in photosynthetic organisms [PATH:ko00710]|transketolase [EC:2.2.1.1]	Metabolism|Metabolism of terpenoids and polyketides|Biosynthesis of ansamycins [PATH:ko01051]|transketolase [EC:2.2.1.1]
Thraus_T3241	Aldehyde dehydrogenase 22A1	AL221_ARATH	44.268%	1.98e-155	NO_KO_DATA	NO_EC_NUMBER	NO_KO_DATA
Thraus_T354	26S proteasome non-ATPase regulatory subunit 7 homolog A	PSD7A_ARATH	50.909%	7.48e-74	K03038	NO_EC_NUMBER	Genetic Information Processing|Folding, sorting and degradation|Proteasome [PATH:ko03050]|26S proteasome regulatory subunit N8	Human Diseases|Infectious disease: viral|Epstein-Barr virus infection [PATH:ko05169]|26S proteasome regulatory subunit N8	Brite Hierarchies|Protein families: genetic information processing|Proteasome [BR:ko03051]|26S proteasome regulatory subunit N8
Thraus_T1758	Proteasome subunit beta type-4	PSB4_MOUSE	46.479%	9.17e-70	K02736	3.4.25.1	Genetic Information Processing|Folding, sorting and degradation|Proteasome [PATH:ko03050]|20S proteasome subunit beta 7 [EC:3.4.25.1]	Brite Hierarchies|Protein families: metabolism|Peptidases and inhibitors [BR:ko01002]|20S proteasome subunit beta 7 [EC:3.4.25.1]	Brite Hierarchies|Protein families: genetic information processing|Proteasome [BR:ko03051]|20S proteasome subunit beta 7 [EC:3.4.25.1]
Thraus_T1759	Peptide methionine sulfoxide reductase MsrB {ECO:0000255|HAMAP-Rule:MF_01400}	MSRB_RALSO	37.179%	1.24e-06	K07305	1.8.4.12	Not Included in Pathway or Brite|Unclassified: metabolism|Enzymes with EC numbers|peptide-methionine (R)-S-oxide reductase [EC:1.8.4.12]
Thraus_T355	Protein transport protein Sec61 subunit alpha	SC61A_DICDI	61.076%	1.85e-130	K10956	NO_EC_NUMBER	Genetic Information Processing|Folding, sorting and degradation|Protein export [PATH:ko03060]|protein transport protein SEC61 subunit alpha	Genetic Information Processing|Folding, sorting and degradation|Protein processing in endoplasmic reticulum [PATH:ko04141]|protein transport protein SEC61 subunit alpha	Cellular Processes|Transport and catabolism|Phagosome [PATH:ko04145]|protein transport protein SEC61 subunit alpha	Human Diseases|Infectious disease: bacterial|Vibrio cholerae infection [PATH:ko05110]|protein transport protein SEC61 subunit alpha	Brite Hierarchies|Protein families: signaling and cellular processes|Secretion system [BR:ko02044]|protein transport protein SEC61 subunit alpha
Thraus_T1752	26S proteasome non-ATPase regulatory subunit 11 homolog	PSD11_ARATH	48.624%	1.39e-91	K03036	NO_EC_NUMBER	Genetic Information Processing|Folding, sorting and degradation|Proteasome [PATH:ko03050]|26S proteasome regulatory subunit N6	Human Diseases|Infectious disease: viral|Epstein-Barr virus infection [PATH:ko05169]|26S proteasome regulatory subunit N6	Brite Hierarchies|Protein families: genetic information processing|Proteasome [BR:ko03051]|26S proteasome regulatory subunit N6
Thraus_T1753	FK506-binding protein 1	FKBP_CRYNJ	38.889%	8.03e-22	K09568	5.2.1.8	Brite Hierarchies|Protein families: genetic information processing|Chaperones and folding catalysts [BR:ko03110]|FK506-binding protein 1 [EC:5.2.1.8]
Thraus_T3082	Probable WRKY transcription factor 19	WRK19_ARATH	46.018%	5.77e-33	NO_KO_DATA	NO_EC_NUMBER	NO_KO_DATA
Thraus_T1751	NADH-ubiquinone oxidoreductase 75 kDa subunit	NDUS1_RECAM	38.723%	2.76e-102	NO_KO_DATA	NO_EC_NUMBER	NO_KO_DATA
Thraus_T1756	Exonuclease 1	EXO1_ORYSJ	41.765%	3.29e-70	K10746	3.1.-.-	Genetic Information Processing|Replication and repair|Mismatch repair [PATH:ko03430]|exonuclease 1 [EC:3.1.-.-]	Brite Hierarchies|Protein families: genetic information processing|DNA replication proteins [BR:ko03032]|exonuclease 1 [EC:3.1.-.-]	Brite Hierarchies|Protein families: genetic information processing|DNA repair and recombination proteins [BR:ko03400]|exonuclease 1 [EC:3.1.-.-]
Thraus_T356	Kinesin-like protein KIF11-B	KI11B_XENLA	56.966%	6.29e-117	K10398	NO_EC_NUMBER	Brite Hierarchies|Protein families: genetic information processing|Chromosome and associated proteins [BR:ko03036]|kinesin family member 11	Brite Hierarchies|Protein families: signaling and cellular processes|Cytoskeleton proteins [BR:ko04812]|kinesin family member 11
Thraus_T1754	Elongation of very long chain fatty acids protein 4 {ECO:0000255|HAMAP-Rule:MF_03204, ECO:0000305}	ELOV4_MOUSE	37.838%	1.99e-21	K10249	2.3.1.199	Metabolism|Lipid metabolism|Fatty acid elongation [PATH:ko00062]|elongation of very long chain fatty acids protein 4 [EC:2.3.1.199]	Metabolism|Lipid metabolism|Biosynthesis of unsaturated fatty acids [PATH:ko01040]|elongation of very long chain fatty acids protein 4 [EC:2.3.1.199]	Brite Hierarchies|Protein families: metabolism|Lipid biosynthesis proteins [BR:ko01004]|elongation of very long chain fatty acids protein 4 [EC:2.3.1.199]
Thraus_T1755	Regulator of telomere elongation helicase 1 {ECO:0000255|HAMAP-Rule:MF_03065}	RTEL1_MOUSE	35.685%	1.31e-132	K11136	3.6.4.12	Brite Hierarchies|Protein families: genetic information processing|DNA replication proteins [BR:ko03032]|regulator of telomere elongation helicase 1 [EC:3.6.4.12]
Thraus_T3831	DNA-directed RNA polymerase subunit 10-like protein {ECO:0000303|PubMed:19110459}	RPBAL_ARATH	67.143%	2.61e-30	K03007	NO_EC_NUMBER	Genetic Information Processing|Transcription|RNA polymerase [PATH:ko03020]|DNA-directed RNA polymerases I, II, and III subunit RPABC5	Organismal Systems|Immune system|Cytosolic DNA-sensing pathway [PATH:ko04623]|DNA-directed RNA polymerases I, II, and III subunit RPABC5	Human Diseases|Neurodegenerative disease|Huntington disease [PATH:ko05016]|DNA-directed RNA polymerases I, II, and III subunit RPABC5	Brite Hierarchies|Protein families: genetic information processing|Transcription machinery [BR:ko03021]|DNA-directed RNA polymerases I, II, and III subunit RPABC5	Brite Hierarchies|Protein families: genetic information processing|DNA repair and recombination proteins [BR:ko03400]|DNA-directed RNA polymerases I, II, and III subunit RPABC5
Thraus_T357	Pyridoxal kinase	PDXK_ARATH	48.264%	2.67e-81	K00868	2.7.1.35	Metabolism|Metabolism of cofactors and vitamins|Vitamin B6 metabolism [PATH:ko00750]|pyridoxine kinase [EC:2.7.1.35]
Thraus_T1118	Tubulin--tyrosine ligase-like protein 12	TTL12_MOUSE	23.265%	2.66e-10	K16609	NO_EC_NUMBER	Brite Hierarchies|Protein families: signaling and cellular processes|Cytoskeleton proteins [BR:ko04812]|tubulin--tyrosine ligase-like protein 12
Thraus_T1119	Probable aldo-keto reductase 1	ALKR1_ARATH	39.13%	4.82e-65	NO_KO_DATA	NO_EC_NUMBER	NO_KO_DATA
Thraus_T1114	Kinesin-like protein KIF19	KIF19_MOUSE	49.242%	2.22e-67	K10401	NO_EC_NUMBER	Brite Hierarchies|Protein families: signaling and cellular processes|Cytoskeleton proteins [BR:ko04812]|kinesin family member 18/19
Thraus_T350	Peptidyl-prolyl cis-trans isomerase-like 4	PPIL4_RHIO9	47.554%	2.19e-80	NO_KO_DATA	NO_EC_NUMBER	NO_KO_DATA
Thraus_T1116	tRNA-dihydrouridine(16/17) synthase [NAD(P)(+)]-like	DUS1L_RAT	37.9%	9.16e-33	K05542	1.3.1.88	Brite Hierarchies|Protein families: genetic information processing|Transfer RNA biogenesis [BR:ko03016]|tRNA-dihydrouridine synthase 1 [EC:1.3.1.88]
Thraus_T1117	Phosphopantetheine adenylyltransferase	COAD_YEAST	37.791%	2.28e-24	K02201	2.7.7.3	Metabolism|Metabolism of cofactors and vitamins|Pantothenate and CoA biosynthesis [PATH:ko00770]|pantetheine-phosphate adenylyltransferase [EC:2.7.7.3]
Thraus_T1110	Protein CutA	CUTA_HUMAN	42.667%	2.76e-13	K03926	NO_EC_NUMBER	Not Included in Pathway or Brite|Unclassified: signaling and cellular processes|Others|periplasmic divalent cation tolerance protein
Thraus_T1111	Hydroxyacylglutathione hydrolase cytoplasmic	GLO2C_ARATH	45.957%	2.05e-63	K01069	3.1.2.6	Metabolism|Carbohydrate metabolism|Pyruvate metabolism [PATH:ko00620]|hydroxyacylglutathione hydrolase [EC:3.1.2.6]
Thraus_T1112	DNA-binding protein HEXBP	HEXP_LEIMA	44.355%	7.75e-18	NO_KO_DATA	NO_EC_NUMBER	NO_KO_DATA
Thraus_T1113	Glutamate--cysteine ligase catalytic subunit	GSH1_HUMAN	50.781%	1.19e-128	K11204	6.3.2.2	Metabolism|Amino acid metabolism|Cysteine and methionine metabolism [PATH:ko00270]|glutamate--cysteine ligase catalytic subunit [EC:6.3.2.2]	Metabolism|Metabolism of other amino acids|Glutathione metabolism [PATH:ko00480]|glutamate--cysteine ligase catalytic subunit [EC:6.3.2.2]	Cellular Processes|Cell growth and death|Ferroptosis [PATH:ko04216]|glutamate--cysteine ligase catalytic subunit [EC:6.3.2.2]	Organismal Systems|Aging|Longevity regulating pathway - worm [PATH:ko04212]|glutamate--cysteine ligase catalytic subunit [EC:6.3.2.2]
Thraus_T14	Plasma membrane calcium-transporting ATPase 1 {ECO:0000250|UniProtKB:P20020}	AT2B1_CHICK	52.959%	1.8e-74	K05850	7.2.2.10	Environmental Information Processing|Signal transduction|Calcium signaling pathway [PATH:ko04020]|P-type Ca2+ transporter type 2B [EC:7.2.2.10]	Environmental Information Processing|Signal transduction|cAMP signaling pathway [PATH:ko04024]|P-type Ca2+ transporter type 2B [EC:7.2.2.10]	Environmental Information Processing|Signal transduction|cGMP-PKG signaling pathway [PATH:ko04022]|P-type Ca2+ transporter type 2B [EC:7.2.2.10]	Organismal Systems|Endocrine system|Aldosterone synthesis and secretion [PATH:ko04925]|P-type Ca2+ transporter type 2B [EC:7.2.2.10]	Organismal Systems|Circulatory system|Adrenergic signaling in cardiomyocytes [PATH:ko04261]|P-type Ca2+ transporter type 2B [EC:7.2.2.10]	Organismal Systems|Digestive system|Salivary secretion [PATH:ko04970]|P-type Ca2+ transporter type 2B [EC:7.2.2.10]	Organismal Systems|Digestive system|Pancreatic secretion [PATH:ko04972]|P-type Ca2+ transporter type 2B [EC:7.2.2.10]	Organismal Systems|Digestive system|Mineral absorption [PATH:ko04978]|P-type Ca2+ transporter type 2B [EC:7.2.2.10]	Organismal Systems|Excretory system|Endocrine and other factor-regulated calcium reabsorption [PATH:ko04961]|P-type Ca2+ transporter type 2B [EC:7.2.2.10]
Thraus_T15	Tubulin-specific chaperone C	TBCC_HUMAN	23.81%	5.48e-12	K21766	NO_EC_NUMBER	Brite Hierarchies|Protein families: signaling and cellular processes|Cytoskeleton proteins [BR:ko04812]|tubulin-specific chaperone C
Thraus_T16	47 kDa protein	P47K_PSECL	31.579%	5.41e-55	NO_KO_DATA	NO_EC_NUMBER	NO_KO_DATA
Thraus_T17	DnaJ homolog subfamily C member 8	DNJC8_RAT	45.977%	2.41e-14	K09528	NO_EC_NUMBER	Brite Hierarchies|Protein families: genetic information processing|Spliceosome [BR:ko03041]|DnaJ homolog subfamily C member 8	Brite Hierarchies|Protein families: genetic information processing|Chaperones and folding catalysts [BR:ko03110]|DnaJ homolog subfamily C member 8
Thraus_T10	Sorting and assembly machinery component 50 homolog	SAM50_XENTR	28.898%	5.62e-34	K07277	NO_EC_NUMBER	Brite Hierarchies|Protein families: genetic information processing|Mitochondrial biogenesis [BR:ko03029]|outer membrane protein insertion porin family	Brite Hierarchies|Protein families: signaling and cellular processes|Transporters [BR:ko02000]|outer membrane protein insertion porin family
Thraus_T600	Actin-related protein 2/3 complex subunit 3-A	ARC3A_XENLA	42.484%	1.78e-42	K05756	NO_EC_NUMBER	Cellular Processes|Transport and catabolism|Endocytosis [PATH:ko04144]|actin related protein 2/3 complex, subunit 3	Cellular Processes|Cell motility|Regulation of actin cytoskeleton [PATH:ko04810]|actin related protein 2/3 complex, subunit 3	Organismal Systems|Immune system|Fc gamma R-mediated phagocytosis [PATH:ko04666]|actin related protein 2/3 complex, subunit 3	Human Diseases|Infectious disease: bacterial|Pathogenic Escherichia coli infection [PATH:ko05130]|actin related protein 2/3 complex, subunit 3	Human Diseases|Infectious disease: bacterial|Salmonella infection [PATH:ko05132]|actin related protein 2/3 complex, subunit 3	Human Diseases|Infectious disease: bacterial|Shigellosis [PATH:ko05131]|actin related protein 2/3 complex, subunit 3	Human Diseases|Infectious disease: bacterial|Bacterial invasion of epithelial cells [PATH:ko05100]|actin related protein 2/3 complex, subunit 3	Brite Hierarchies|Protein families: genetic information processing|Membrane trafficking [BR:ko04131]|actin related protein 2/3 complex, subunit 3	Brite Hierarchies|Protein families: signaling and cellular processes|Cytoskeleton proteins [BR:ko04812]|actin related protein 2/3 complex, subunit 3
Thraus_T12	Putative glycosyl hydrolase ecdE {ECO:0000303|PubMed:22998630}	ECDE_ASPRU	40%	2.04e-11	NO_KO_DATA	NO_EC_NUMBER	NO_KO_DATA
Thraus_T13	Ubiquitin-like modifier-activating enzyme 1	UBA1_DICDI	48.059%	0	K03178	6.2.1.45	Genetic Information Processing|Folding, sorting and degradation|Ubiquitin mediated proteolysis [PATH:ko04120]|ubiquitin-activating enzyme E1 [EC:6.2.1.45]	Human Diseases|Neurodegenerative disease|Parkinson disease [PATH:ko05012]|ubiquitin-activating enzyme E1 [EC:6.2.1.45]	Brite Hierarchies|Protein families: genetic information processing|Ubiquitin system [BR:ko04121]|ubiquitin-activating enzyme E1 [EC:6.2.1.45]	Brite Hierarchies|Protein families: signaling and cellular processes|Exosome [BR:ko04147]|ubiquitin-activating enzyme E1 [EC:6.2.1.45]
Thraus_T18	Retinol dehydrogenase 7	RDH7_RAT	40.942%	9.26e-61	K11154	1.1.1.-	Metabolism|Metabolism of cofactors and vitamins|Retinol metabolism [PATH:ko00830]|retinol dehydrogenase 16 [EC:1.1.1.-]
Thraus_T19	Myotubularin-related protein 13 {ECO:0000305}	MTMRD_MOUSE	29.317%	6.97e-22	K18061	NO_EC_NUMBER	Brite Hierarchies|Protein families: metabolism|Protein phosphatases and associated proteins [BR:ko01009]|myotubularin-related protein 5/13
Thraus_T4743	Ubiquitin carboxyl-terminal hydrolase 33	UBP33_MOUSE	26.793%	2.76e-35	K11848	3.4.19.12	Brite Hierarchies|Protein families: metabolism|Peptidases and inhibitors [BR:ko01002]|ubiquitin carboxyl-terminal hydrolase 20/33 [EC:3.4.19.12]	Brite Hierarchies|Protein families: genetic information processing|Ubiquitin system [BR:ko04121]|ubiquitin carboxyl-terminal hydrolase 20/33 [EC:3.4.19.12]
Thraus_T5046	V-type proton ATPase catalytic subunit A	VATA_TRYCO	57.11%	6.95e-160	NO_KO_DATA	NO_EC_NUMBER	NO_KO_DATA
Thraus_T3220	Probable serine/threonine-protein kinase WNK3	WNK3_ARATH	45.548%	2.36e-74	K08867	2.7.11.1	Brite Hierarchies|Protein families: metabolism|Protein kinases [BR:ko01001]|WNK lysine deficient protein kinase [EC:2.7.11.1]	Brite Hierarchies|Protein families: metabolism|Protein phosphatases and associated proteins [BR:ko01009]|WNK lysine deficient protein kinase [EC:2.7.11.1]
Thraus_T4433	Cilia- and flagella-associated protein 20	CFA20_DROME	36.441%	6.89e-25	NO_KO_DATA	NO_EC_NUMBER	NO_KO_DATA
Thraus_T4872	3-methyl-2-oxobutanoate hydroxymethyltransferase 1, mitochondrial	PANB1_ARATH	50.162%	4.24e-104	K00606	2.1.2.11	Metabolism|Metabolism of cofactors and vitamins|Pantothenate and CoA biosynthesis [PATH:ko00770]|3-methyl-2-oxobutanoate hydroxymethyltransferase [EC:2.1.2.11]
Thraus_T4873	Kinesin light chain 3	KLC3_MOUSE	39.64%	1.01e-13	K10407	NO_EC_NUMBER	Human Diseases|Infectious disease: bacterial|Salmonella infection [PATH:ko05132]|kinesin light chain	Brite Hierarchies|Protein families: genetic information processing|Messenger RNA biogenesis [BR:ko03019]|kinesin light chain	Brite Hierarchies|Protein families: signaling and cellular processes|Cytoskeleton proteins [BR:ko04812]|kinesin light chain
Thraus_T4874	Hydroxyacylglutathione hydrolase cytoplasmic	GLO2C_ARATH	45.736%	1.62e-75	K01069	3.1.2.6	Metabolism|Carbohydrate metabolism|Pyruvate metabolism [PATH:ko00620]|hydroxyacylglutathione hydrolase [EC:3.1.2.6]
Thraus_T4875	VCP-like ATPase	VAT_THEAC	44.55%	7.6e-59	K13525	NO_EC_NUMBER	Genetic Information Processing|Folding, sorting and degradation|Protein processing in endoplasmic reticulum [PATH:ko04141]|transitional endoplasmic reticulum ATPase	Human Diseases|Infectious disease: bacterial|Legionellosis [PATH:ko05134]|transitional endoplasmic reticulum ATPase	Brite Hierarchies|Protein families: genetic information processing|Messenger RNA biogenesis [BR:ko03019]|transitional endoplasmic reticulum ATPase	Brite Hierarchies|Protein families: genetic information processing|Membrane trafficking [BR:ko04131]|transitional endoplasmic reticulum ATPase	Brite Hierarchies|Protein families: signaling and cellular processes|Exosome [BR:ko04147]|transitional endoplasmic reticulum ATPase
Thraus_T2449	Ethylmalonyl-CoA decarboxylase	ECHD1_XENTR	37.054%	1.11e-23	K18426	4.1.1.94|4.1.1.-	Metabolism|Carbohydrate metabolism|Propanoate metabolism [PATH:ko00640]|ethylmalonyl-CoA/methylmalonyl-CoA decarboxylase [EC:4.1.1.94 4.1.1.-]
Thraus_T2448	Lipid A export ATP-binding/permease protein MsbA {ECO:0000255|HAMAP-Rule:MF_01703}	MSBA_ALKEH	41.296%	1.71e-32	K11085	3.6.3.-	Environmental Information Processing|Membrane transport|ABC transporters [PATH:ko02010]|ATP-binding cassette, subfamily B, bacterial MsbA [EC:3.6.3.-]	Brite Hierarchies|Protein families: signaling and cellular processes|Transporters [BR:ko02000]|ATP-binding cassette, subfamily B, bacterial MsbA [EC:3.6.3.-]
Thraus_T2447	UDP-N-acetylglucosamine transporter	S35A3_HUMAN	50.482%	2.29e-82	K15272	NO_EC_NUMBER	Brite Hierarchies|Protein families: signaling and cellular processes|Transporters [BR:ko02000]|solute carrier family 35 (UDP-sugar transporter), member A1/2/3
Thraus_T2446	Protein STIP1 homolog	STIP1_DICDI	44.737%	2.45e-13	K09553	NO_EC_NUMBER	Human Diseases|Neurodegenerative disease|Prion diseases [PATH:ko05020]|stress-induced-phosphoprotein 1	Brite Hierarchies|Protein families: genetic information processing|Chaperones and folding catalysts [BR:ko03110]|stress-induced-phosphoprotein 1
Thraus_T2445	Kinesin-associated protein 3	KIFA3_STRPU	38.225%	5.21e-95	NO_KO_DATA	NO_EC_NUMBER	NO_KO_DATA
Thraus_T2444	Putative epoxide hydrolase	HYEP_STIAD	39.447%	3.73e-88	NO_KO_DATA	NO_EC_NUMBER	NO_KO_DATA
Thraus_T2443	U5 small nuclear ribonucleoprotein 200 kDa helicase	U520_HUMAN	49.773%	0	K12854	3.6.4.13	Genetic Information Processing|Transcription|Spliceosome [PATH:ko03040]|pre-mRNA-splicing helicase BRR2 [EC:3.6.4.13]	Brite Hierarchies|Protein families: genetic information processing|Spliceosome [BR:ko03041]|pre-mRNA-splicing helicase BRR2 [EC:3.6.4.13]
Thraus_T2442	Putative serine/threonine-protein kinase/receptor R818	YR818_MIMIV	45.283%	1.03e-40	NO_KO_DATA	NO_EC_NUMBER	NO_KO_DATA
Thraus_T2441	Guanine nucleotide-binding protein alpha-17 subunit	GPA17_CAEEL	39.835%	2.12e-83	K04640	NO_EC_NUMBER	Brite Hierarchies|Protein families: signaling and cellular processes|GTP-binding proteins [BR:ko04031]|guanine nucleotide-binding protein subunit alpha, other
Thraus_T2440	NEDD8-like protein RUB3	RUB3_ARATH	37.143%	3.18e-08	K12158	NO_EC_NUMBER	Brite Hierarchies|Protein families: genetic information processing|Ubiquitin system [BR:ko04121]|ubiquitin-like protein Nedd8
Thraus_T4984	Inositol oxygenase	MIOX_MOUSE	48%	2.99e-44	K00469	1.13.99.1	Metabolism|Carbohydrate metabolism|Ascorbate and aldarate metabolism [PATH:ko00053]|inositol oxygenase [EC:1.13.99.1]	Metabolism|Carbohydrate metabolism|Inositol phosphate metabolism [PATH:ko00562]|inositol oxygenase [EC:1.13.99.1]
Thraus_T3360	Transmembrane protein 104	TM104_HUMAN	31.034%	4.41e-30	NO_KO_DATA	NO_EC_NUMBER	NO_KO_DATA
Thraus_T4986	Fatty acyl-CoA reductase	ACR1_ACIAD	39.456%	1.23e-54	NO_KO_DATA	NO_EC_NUMBER	NO_KO_DATA
Thraus_T4987	DNA repair protein REV1	REV1_MOUSE	31.727%	1.59e-65	K03515	2.7.7.-	Genetic Information Processing|Replication and repair|Fanconi anemia pathway [PATH:ko03460]|DNA repair protein REV1 [EC:2.7.7.-]	Brite Hierarchies|Protein families: genetic information processing|DNA repair and recombination proteins [BR:ko03400]|DNA repair protein REV1 [EC:2.7.7.-]
Thraus_T4980	E3 ubiquitin-protein ligase HERC2	HERC2_HUMAN	41.935%	1.74e-34	K10595	2.3.2.26	Genetic Information Processing|Folding, sorting and degradation|Ubiquitin mediated proteolysis [PATH:ko04120]|E3 ubiquitin-protein ligase HERC2 [EC:2.3.2.26]	Brite Hierarchies|Protein families: genetic information processing|Ubiquitin system [BR:ko04121]|E3 ubiquitin-protein ligase HERC2 [EC:2.3.2.26]	Brite Hierarchies|Protein families: genetic information processing|Chromosome and associated proteins [BR:ko03036]|E3 ubiquitin-protein ligase HERC2 [EC:2.3.2.26]	Brite Hierarchies|Protein families: genetic information processing|DNA repair and recombination proteins [BR:ko03400]|E3 ubiquitin-protein ligase HERC2 [EC:2.3.2.26]
Thraus_T4981	Ubiquitin carboxyl-terminal hydrolase 24	UBP24_HUMAN	40.107%	3.65e-37	K11840	3.4.19.12	Brite Hierarchies|Protein families: metabolism|Peptidases and inhibitors [BR:ko01002]|ubiquitin carboxyl-terminal hydrolase 9/24 [EC:3.4.19.12]	Brite Hierarchies|Protein families: genetic information processing|Ubiquitin system [BR:ko04121]|ubiquitin carboxyl-terminal hydrolase 9/24 [EC:3.4.19.12]
Thraus_T4982	Mitoferrin	MFRN_DICDI	35.616%	1.16e-11	K15113	NO_EC_NUMBER	Brite Hierarchies|Protein families: genetic information processing|Mitochondrial biogenesis [BR:ko03029]|solute carrier family 25 (mitochondrial iron transporter), member 28/37	Brite Hierarchies|Protein families: signaling and cellular processes|Transporters [BR:ko02000]|solute carrier family 25 (mitochondrial iron transporter), member 28/37
Thraus_T3265	Probable serine/threonine-protein kinase nek3	NEK3_DICDI	34.914%	3.74e-39	K08857	2.7.11.1	Brite Hierarchies|Protein families: metabolism|Protein kinases [BR:ko01001]|NIMA (never in mitosis gene a)-related kinase 1/4/5 [EC:2.7.11.1]	Brite Hierarchies|Protein families: genetic information processing|Chromosome and associated proteins [BR:ko03036]|NIMA (never in mitosis gene a)-related kinase 1/4/5 [EC:2.7.11.1]	Brite Hierarchies|Protein families: genetic information processing|DNA repair and recombination proteins [BR:ko03400]|NIMA (never in mitosis gene a)-related kinase 1/4/5 [EC:2.7.11.1]
Thraus_T3221	Carbon catabolite repressor protein 4 homolog 1	CCR4A_ARATH	36.854%	1.38e-71	K12603	3.1.13.4	Genetic Information Processing|Folding, sorting and degradation|RNA degradation [PATH:ko03018]|CCR4-NOT transcription complex subunit 6 [EC:3.1.13.4]	Brite Hierarchies|Protein families: genetic information processing|Messenger RNA biogenesis [BR:ko03019]|CCR4-NOT transcription complex subunit 6 [EC:3.1.13.4]
Thraus_T4988	Katanin p60 ATPase-containing subunit A-like 2 {ECO:0000255|HAMAP-Rule:MF_03025}	KATL2_XENTR	46.296%	3.36e-142	K07767	5.6.1.1	Brite Hierarchies|Protein families: signaling and cellular processes|Cytoskeleton proteins [BR:ko04812]|katanin p60 ATPase-containing subunit A1 [EC:5.6.1.1]
Thraus_T3266	Dynein regulatory complex protein 9 {ECO:0000303|PubMed:23427265, ECO:0000303|PubMed:25411337}	DRC9_CHLRE	26.299%	2.45e-16	NO_KO_DATA	NO_EC_NUMBER	NO_KO_DATA
Thraus_T4755	Serine/threonine-protein phosphatase PP1 isozyme 7 {ECO:0000305}	PP17_ARATH	55.674%	8.74e-113	K06269	3.1.3.16	Genetic Information Processing|Translation|mRNA surveillance pathway [PATH:ko03015]|serine/threonine-protein phosphatase PP1 catalytic subunit [EC:3.1.3.16]	Environmental Information Processing|Signal transduction|Hippo signaling pathway [PATH:ko04390]|serine/threonine-protein phosphatase PP1 catalytic subunit [EC:3.1.3.16]	Environmental Information Processing|Signal transduction|cAMP signaling pathway [PATH:ko04024]|serine/threonine-protein phosphatase PP1 catalytic subunit [EC:3.1.3.16]	Environmental Information Processing|Signal transduction|cGMP-PKG signaling pathway [PATH:ko04022]|serine/threonine-protein phosphatase PP1 catalytic subunit [EC:3.1.3.16]	Cellular Processes|Cell growth and death|Meiosis - yeast [PATH:ko04113]|serine/threonine-protein phosphatase PP1 catalytic subunit [EC:3.1.3.16]	Cellular Processes|Cell growth and death|Oocyte meiosis [PATH:ko04114]|serine/threonine-protein phosphatase PP1 catalytic subunit [EC:3.1.3.16]	Cellular Processes|Cell growth and death|Cellular senescence [PATH:ko04218]|serine/threonine-protein phosphatase PP1 catalytic subunit [EC:3.1.3.16]	Cellular Processes|Cellular community - eukaryotes|Focal adhesion [PATH:ko04510]|serine/threonine-protein phosphatase PP1 catalytic subunit [EC:3.1.3.16]	Cellular Processes|Cell motility|Regulation of actin cytoskeleton [PATH:ko04810]|serine/threonine-protein phosphatase PP1 catalytic subunit [EC:3.1.3.16]	Organismal Systems|Immune system|Platelet activation [PATH:ko04611]|serine/threonine-protein phosphatase PP1 catalytic subunit [EC:3.1.3.16]	Organismal Systems|Endocrine system|Insulin signaling pathway [PATH:ko04910]|serine/threonine-protein phosphatase PP1 catalytic subunit [EC:3.1.3.16]	Organismal Systems|Endocrine system|Oxytocin signaling pathway [PATH:ko04921]|serine/threonine-protein phosphatase PP1 catalytic subunit [EC:3.1.3.16]	Organismal Systems|Circulatory system|Adrenergic signaling in cardiomyocytes [PATH:ko04261]|serine/threonine-protein phosphatase PP1 catalytic subunit [EC:3.1.3.16]	Organismal Systems|Circulatory system|Vascular smooth muscle contraction [PATH:ko04270]|serine/threonine-protein phosphatase PP1 catalytic subunit [EC:3.1.3.16]	Organismal Systems|Nervous system|Dopaminergic synapse [PATH:ko04728]|serine/threonine-protein phosphatase PP1 catalytic subunit [EC:3.1.3.16]	Organismal Systems|Nervous system|Long-term potentiation [PATH:ko04720]|serine/threonine-protein phosphatase PP1 catalytic subunit [EC:3.1.3.16]	Organismal Systems|Sensory system|Inflammatory mediator regulation of TRP channels [PATH:ko04750]|serine/threonine-protein phosphatase PP1 catalytic subunit [EC:3.1.3.16]	Human Diseases|Cancer: overview|Proteoglycans in cancer [PATH:ko05205]|serine/threonine-protein phosphatase PP1 catalytic subunit [EC:3.1.3.16]	Human Diseases|Substance dependence|Amphetamine addiction [PATH:ko05031]|serine/threonine-protein phosphatase PP1 catalytic subunit [EC:3.1.3.16]	Human Diseases|Substance dependence|Alcoholism [PATH:ko05034]|serine/threonine-protein phosphatase PP1 catalytic subunit [EC:3.1.3.16]	Human Diseases|Endocrine and metabolic disease|Insulin resistance [PATH:ko04931]|serine/threonine-protein phosphatase PP1 catalytic subunit [EC:3.1.3.16]	Human Diseases|Infectious disease: viral|Herpes simplex virus 1 infection [PATH:ko05168]|serine/threonine-protein phosphatase PP1 catalytic subunit [EC:3.1.3.16]	Brite Hierarchies|Protein families: metabolism|Protein phosphatases and associated proteins [BR:ko01009]|serine/threonine-protein phosphatase PP1 catalytic subunit [EC:3.1.3.16]	Brite Hierarchies|Protein families: genetic information processing|Transcription machinery [BR:ko03021]|serine/threonine-protein phosphatase PP1 catalytic subunit [EC:3.1.3.16]	Brite Hierarchies|Protein families: genetic information processing|Messenger RNA biogenesis [BR:ko03019]|serine/threonine-protein phosphatase PP1 catalytic subunit [EC:3.1.3.16]	Brite Hierarchies|Protein families: genetic information processing|Spliceosome [BR:ko03041]|serine/threonine-protein phosphatase PP1 catalytic subunit [EC:3.1.3.16]
Thraus_T5438	Probable aldo-keto reductase 4	ALKR4_ARATH	42.053%	1.18e-70	NO_KO_DATA	NO_EC_NUMBER	NO_KO_DATA
Thraus_T3267	Leucine-rich repeat-containing protein 9	LRRC9_XENTR	36.644%	2.06e-43	NO_KO_DATA	NO_EC_NUMBER	NO_KO_DATA
Thraus_T2045	Probable sodium/metabolite cotransporter BASS4, chloroplastic	BASS4_ORYSJ	33.735%	3.99e-37	K14347	NO_EC_NUMBER	Brite Hierarchies|Protein families: signaling and cellular processes|Transporters [BR:ko02000]|solute carrier family 10 (sodium/bile acid cotransporter), member 7	Brite Hierarchies|Protein families: signaling and cellular processes|Exosome [BR:ko04147]|solute carrier family 10 (sodium/bile acid cotransporter), member 7
Thraus_T5346	Probable UDP-N-acetylglucosamine--peptide N-acetylglucosaminyltransferase SPINDLY	SPY_ARATH	25.862%	3.22e-20	K09667	2.4.1.255	Metabolism|Glycan biosynthesis and metabolism|Other types of O-glycan biosynthesis [PATH:ko00514]|protein O-GlcNAc transferase [EC:2.4.1.255]	Human Diseases|Endocrine and metabolic disease|Insulin resistance [PATH:ko04931]|protein O-GlcNAc transferase [EC:2.4.1.255]	Brite Hierarchies|Protein families: metabolism|Glycosyltransferases [BR:ko01003]|protein O-GlcNAc transferase [EC:2.4.1.255]	Brite Hierarchies|Protein families: genetic information processing|Chromosome and associated proteins [BR:ko03036]|protein O-GlcNAc transferase [EC:2.4.1.255]
Thraus_T3260	40S ribosomal protein S23	RS23_DROME	75.182%	8.55e-69	K02973	NO_EC_NUMBER	Genetic Information Processing|Translation|Ribosome [PATH:ko03010]|small subunit ribosomal protein S23e	Brite Hierarchies|Protein families: genetic information processing|Ribosome [BR:ko03011]|small subunit ribosomal protein S23e
Thraus_T2044	Nucleolar protein 10	NOL10_XENLA	43.321%	1.85e-142	K14788	NO_EC_NUMBER	Brite Hierarchies|Protein families: genetic information processing|Ribosome biogenesis [BR:ko03009]|ribosome biogenesis protein ENP2
Thraus_T1573	Ribosomal RNA large subunit methyltransferase E {ECO:0000255|HAMAP-Rule:MF_01547}	RLME_METCA	41.063%	5.61e-45	K02427	2.1.1.166	Brite Hierarchies|Protein families: genetic information processing|Ribosome biogenesis [BR:ko03009]|23S rRNA (uridine2552-2'-O)-methyltransferase [EC:2.1.1.166]
Thraus_T3575	Rsm22-cox11 tandem protein 2, mitochondrial	CO112_SCHPO	33.197%	7.22e-24	NO_KO_DATA	NO_EC_NUMBER	NO_KO_DATA
Thraus_T3661	2,3-bisphosphoglycerate-dependent phosphoglycerate mutase {ECO:0000255|HAMAP-Rule:MF_01039}	GPMA_CHLPN	29.958%	8.02e-26	K01834	5.4.2.11	Metabolism|Carbohydrate metabolism|Glycolysis / Gluconeogenesis [PATH:ko00010]|2,3-bisphosphoglycerate-dependent phosphoglycerate mutase [EC:5.4.2.11]	Metabolism|Energy metabolism|Methane metabolism [PATH:ko00680]|2,3-bisphosphoglycerate-dependent phosphoglycerate mutase [EC:5.4.2.11]	Metabolism|Amino acid metabolism|Glycine, serine and threonine metabolism [PATH:ko00260]|2,3-bisphosphoglycerate-dependent phosphoglycerate mutase [EC:5.4.2.11]	Organismal Systems|Endocrine system|Glucagon signaling pathway [PATH:ko04922]|2,3-bisphosphoglycerate-dependent phosphoglycerate mutase [EC:5.4.2.11]	Human Diseases|Cancer: overview|Central carbon metabolism in cancer [PATH:ko05230]|2,3-bisphosphoglycerate-dependent phosphoglycerate mutase [EC:5.4.2.11]	Brite Hierarchies|Protein families: genetic information processing|Membrane trafficking [BR:ko04131]|2,3-bisphosphoglycerate-dependent phosphoglycerate mutase [EC:5.4.2.11]	Brite Hierarchies|Protein families: signaling and cellular processes|Exosome [BR:ko04147]|2,3-bisphosphoglycerate-dependent phosphoglycerate mutase [EC:5.4.2.11]
Thraus_T3662	5'-AMP-activated protein kinase catalytic subunit alpha-2	AAPK2_CAEEL	42.5%	7.14e-11	K07198	2.7.11.11	Environmental Information Processing|Signal transduction|Apelin signaling pathway [PATH:ko04371]|5'-AMP-activated protein kinase, catalytic alpha subunit [EC:2.7.11.11]	Environmental Information Processing|Signal transduction|FoxO signaling pathway [PATH:ko04068]|5'-AMP-activated protein kinase, catalytic alpha subunit [EC:2.7.11.11]	Environmental Information Processing|Signal transduction|PI3K-Akt signaling pathway [PATH:ko04151]|5'-AMP-activated protein kinase, catalytic alpha subunit [EC:2.7.11.11]	Environmental Information Processing|Signal transduction|AMPK signaling pathway [PATH:ko04152]|5'-AMP-activated protein kinase, catalytic alpha subunit [EC:2.7.11.11]	Environmental Information Processing|Signal transduction|mTOR signaling pathway [PATH:ko04150]|5'-AMP-activated protein kinase, catalytic alpha subunit [EC:2.7.11.11]	Cellular Processes|Transport and catabolism|Autophagy - animal [PATH:ko04140]|5'-AMP-activated protein kinase, catalytic alpha subunit [EC:2.7.11.11]	Cellular Processes|Cellular community - eukaryotes|Tight junction [PATH:ko04530]|5'-AMP-activated protein kinase, catalytic alpha subunit [EC:2.7.11.11]	Organismal Systems|Endocrine system|Insulin signaling pathway [PATH:ko04910]|5'-AMP-activated protein kinase, catalytic alpha subunit [EC:2.7.11.11]	Organismal Systems|Endocrine system|Glucagon signaling pathway [PATH:ko04922]|5'-AMP-activated protein kinase, catalytic alpha subunit [EC:2.7.11.11]	Organismal Systems|Endocrine system|Adipocytokine signaling pathway [PATH:ko04920]|5'-AMP-activated protein kinase, catalytic alpha subunit [EC:2.7.11.11]	Organismal Systems|Endocrine system|Oxytocin signaling pathway [PATH:ko04921]|5'-AMP-activated protein kinase, catalytic alpha subunit [EC:2.7.11.11]	Organismal Systems|Development and regeneration|Axon regeneration [PATH:ko04361]|5'-AMP-activated protein kinase, catalytic alpha subunit [EC:2.7.11.11]	Organismal Systems|Aging|Longevity regulating pathway [PATH:ko04211]|5'-AMP-activated protein kinase, catalytic alpha subunit [EC:2.7.11.11]	Organismal Systems|Aging|Longevity regulating pathway - multiple species [PATH:ko04213]|5'-AMP-activated protein kinase, catalytic alpha subunit [EC:2.7.11.11]	Organismal Systems|Environmental adaptation|Circadian rhythm [PATH:ko04710]|5'-AMP-activated protein kinase, catalytic alpha subunit [EC:2.7.11.11]	Organismal Systems|Environmental adaptation|Thermogenesis [PATH:ko04714]|5'-AMP-activated protein kinase, catalytic alpha subunit [EC:2.7.11.11]	Human Diseases|Cardiovascular disease|Fluid shear stress and atherosclerosis [PATH:ko05418]|5'-AMP-activated protein kinase, catalytic alpha subunit [EC:2.7.11.11]	Human Diseases|Cardiovascular disease|Hypertrophic cardiomyopathy (HCM) [PATH:ko05410]|5'-AMP-activated protein kinase, catalytic alpha subunit [EC:2.7.11.11]	Human Diseases|Endocrine and metabolic disease|Non-alcoholic fatty liver disease (NAFLD) [PATH:ko04932]|5'-AMP-activated protein kinase, catalytic alpha subunit [EC:2.7.11.11]	Human Diseases|Endocrine and metabolic disease|Insulin resistance [PATH:ko04931]|5'-AMP-activated protein kinase, catalytic alpha subunit [EC:2.7.11.11]	Brite Hierarchies|Protein families: metabolism|Protein kinases [BR:ko01001]|5'-AMP-activated protein kinase, catalytic alpha subunit [EC:2.7.11.11]	Brite Hierarchies|Protein families: genetic information processing|Membrane trafficking [BR:ko04131]|5'-AMP-activated protein kinase, catalytic alpha subunit [EC:2.7.11.11]	Brite Hierarchies|Protein families: genetic information processing|Mitochondrial biogenesis [BR:ko03029]|5'-AMP-activated protein kinase, catalytic alpha subunit [EC:2.7.11.11]
Thraus_T3663	Rabankyrin-5 {ECO:0000303|PubMed:15328530}	ANFY1_HUMAN	35.878%	1.58e-15	K20129	NO_EC_NUMBER	Brite Hierarchies|Protein families: genetic information processing|Membrane trafficking [BR:ko04131]|rabankyrin-5
Thraus_T3664	Cyclic AMP receptor-like protein A	CRLA_DICDI	26.284%	4.41e-24	K22987	NO_EC_NUMBER	Brite Hierarchies|Protein families: signaling and cellular processes|G protein-coupled receptors [BR:ko04030]|cAMP receptor-like G-protein coupled receptor
Thraus_T3665	Ubiquitin carboxyl-terminal hydrolase 2 {ECO:0000303|PubMed:17559514}	UCH2_ARATH	50.473%	5.83e-103	K05610	3.4.19.12	Brite Hierarchies|Protein families: metabolism|Peptidases and inhibitors [BR:ko01002]|ubiquitin carboxyl-terminal hydrolase L5 [EC:3.4.19.12]	Brite Hierarchies|Protein families: genetic information processing|Ubiquitin system [BR:ko04121]|ubiquitin carboxyl-terminal hydrolase L5 [EC:3.4.19.12]
Thraus_T3570	U-box domain-containing protein 70 {ECO:0000303|PubMed:19825583}	PUB70_ORYSJ	33.333%	5.88e-09	NO_KO_DATA	NO_EC_NUMBER	NO_KO_DATA
Thraus_T3667	Gastric triacylglycerol lipase	LIPG_CANLF	29.178%	2.01e-38	K14452	3.1.1.3	Metabolism|Lipid metabolism|Glycerolipid metabolism [PATH:ko00561]|gastric triacylglycerol lipase [EC:3.1.1.3]	Organismal Systems|Digestive system|Fat digestion and absorption [PATH:ko04975]|gastric triacylglycerol lipase [EC:3.1.1.3]
Thraus_T3668	DNA helicase MCM8	MCM8_HUMAN	54.455%	1.56e-29	K10737	3.6.4.12	Brite Hierarchies|Protein families: genetic information processing|DNA replication proteins [BR:ko03032]|DNA helicase MCM8 [EC:3.6.4.12]
Thraus_T3669	Sodium-dependent phosphate transport protein 2A	NPT2A_RABIT	57.364%	1.45e-27	K14683	NO_EC_NUMBER	Organismal Systems|Endocrine system|Parathyroid hormone synthesis, secretion and action [PATH:ko04928]|solute carrier family 34 (sodium-dependent phosphate cotransporter)	Organismal Systems|Digestive system|Mineral absorption [PATH:ko04978]|solute carrier family 34 (sodium-dependent phosphate cotransporter)	Brite Hierarchies|Protein families: signaling and cellular processes|Transporters [BR:ko02000]|solute carrier family 34 (sodium-dependent phosphate cotransporter)	Brite Hierarchies|Protein families: signaling and cellular processes|Exosome [BR:ko04147]|solute carrier family 34 (sodium-dependent phosphate cotransporter)
Thraus_T3263	Mediator of RNA polymerase II transcription subunit 22a	MD22A_ARATH	34.921%	1.31e-06	K15139	NO_EC_NUMBER	Brite Hierarchies|Protein families: genetic information processing|Transcription machinery [BR:ko03021]|mediator of RNA polymerase II transcription subunit 22
Thraus_T4435	60S ribosomal protein L10-A	RL10A_SCHPO	48.913%	6.57e-26	K02866	NO_EC_NUMBER	Genetic Information Processing|Translation|Ribosome [PATH:ko03010]|large subunit ribosomal protein L10e	Brite Hierarchies|Protein families: genetic information processing|Ribosome [BR:ko03011]|large subunit ribosomal protein L10e
Thraus_T1803	Phenylalanine--tRNA ligase alpha subunit	SYFA_HUMAN	50.305%	4.29e-155	K01889	6.1.1.20	Genetic Information Processing|Translation|Aminoacyl-tRNA biosynthesis [PATH:ko00970]|phenylalanyl-tRNA synthetase alpha chain [EC:6.1.1.20]	Brite Hierarchies|Protein families: metabolism|Amino acid related enzymes [BR:ko01007]|phenylalanyl-tRNA synthetase alpha chain [EC:6.1.1.20]	Brite Hierarchies|Protein families: genetic information processing|Transfer RNA biogenesis [BR:ko03016]|phenylalanyl-tRNA synthetase alpha chain [EC:6.1.1.20]
Thraus_T1801	Palmitoyltransferase ZDHHC20	ZDH20_MOUSE	32.584%	3.7e-13	K20028	2.3.1.225	Brite Hierarchies|Protein families: genetic information processing|Membrane trafficking [BR:ko04131]|palmitoyltransferase ZDHHC2/15/20 [EC:2.3.1.225]
Thraus_T1806	Transmembrane 9 superfamily member 4 {ECO:0000305}	TMN4_ARATH	52.608%	1.59e-142	NO_KO_DATA	NO_EC_NUMBER	NO_KO_DATA
Thraus_T1807	Peptidyl-prolyl cis-trans isomerase	PPIA_ECHGR	50.505%	6.12e-17	NO_KO_DATA	NO_EC_NUMBER	NO_KO_DATA
Thraus_T1804	25S rRNA (adenine(645)-N(1))-methyltransferase	RRP8_SCHPO	46.502%	3.23e-66	K14850	2.1.1.287	Brite Hierarchies|Protein families: genetic information processing|Ribosome biogenesis [BR:ko03009]|ribosomal RNA-processing protein 8 [EC:2.1.1.287]
Thraus_T1805	Calcium-dependent protein kinase 31	CDPKV_ARATH	30.705%	1.89e-28	K13412	2.7.11.1	Organismal Systems|Environmental adaptation|Plant-pathogen interaction [PATH:ko04626]|calcium-dependent protein kinase [EC:2.7.11.1]	Human Diseases|Infectious disease: parasitic|Toxoplasmosis [PATH:ko05145]|calcium-dependent protein kinase [EC:2.7.11.1]	Brite Hierarchies|Protein families: metabolism|Protein kinases [BR:ko01001]|calcium-dependent protein kinase [EC:2.7.11.1]
Thraus_T1808	Transcription initiation factor TFIID subunit 13 {ECO:0000250|UniProtKB:Q15543}	TAF13_PONAB	33.803%	9.31e-10	K03127	NO_EC_NUMBER	Genetic Information Processing|Transcription|Basal transcription factors [PATH:ko03022]|transcription initiation factor TFIID subunit 13	Brite Hierarchies|Protein families: genetic information processing|Transcription machinery [BR:ko03021]|transcription initiation factor TFIID subunit 13
Thraus_T1809	Elongin-C	ELOC_DICDI	47.368%	1.14e-19	K03872	NO_EC_NUMBER	Genetic Information Processing|Folding, sorting and degradation|Ubiquitin mediated proteolysis [PATH:ko04120]|elongin-C	Environmental Information Processing|Signal transduction|HIF-1 signaling pathway [PATH:ko04066]|elongin-C	Human Diseases|Cancer: overview|Pathways in cancer [PATH:ko05200]|elongin-C	Human Diseases|Cancer: specific types|Renal cell carcinoma [PATH:ko05211]|elongin-C	Human Diseases|Infectious disease: viral|Human immunodeficiency virus 1 infection [PATH:ko05170]|elongin-C	Brite Hierarchies|Protein families: genetic information processing|Ubiquitin system [BR:ko04121]|elongin-C	Brite Hierarchies|Protein families: genetic information processing|DNA repair and recombination proteins [BR:ko03400]|elongin-C
Thraus_T3345	Intraflagellar transport protein 122 homolog	IF122_XENTR	46.414%	0	K19656	NO_EC_NUMBER	Brite Hierarchies|Protein families: genetic information processing|Chromosome and associated proteins [BR:ko03036]|intraflagellar transport protein 122
Thraus_T3050	60S ribosomal protein L44	RL44_CANTR	77%	5.22e-50	NO_KO_DATA	NO_EC_NUMBER	NO_KO_DATA
Thraus_T5045	Probable endoplasmic reticulum-Golgi intermediate compartment protein 3	ERGI3_DICDI	31.111%	6.11e-46	K20367	NO_EC_NUMBER	Brite Hierarchies|Protein families: genetic information processing|Membrane trafficking [BR:ko04131]|endoplasmic reticulum-Golgi intermediate compartment protein 3
Thraus_T3223	Molybdate-anion transporter	MFSD5_HUMAN	28.325%	1.07e-23	NO_KO_DATA	NO_EC_NUMBER	NO_KO_DATA
Thraus_T5440	Nitrate reductase [NADH]	NIA1_MAIZE	38.961%	3.28e-12	NO_KO_DATA	NO_EC_NUMBER	NO_KO_DATA
Thraus_T3342	Retrovirus-related Pol polyprotein from transposon TNT 1-94	POLX_TOBAC	28.824%	1.11e-36	NO_KO_DATA	NO_EC_NUMBER	NO_KO_DATA
Thraus_T2599	ER lumen protein-retaining receptor B	ERD2B_ARATH	57.143%	6.99e-81	K10949	NO_EC_NUMBER	Human Diseases|Infectious disease: bacterial|Vibrio cholerae infection [PATH:ko05110]|ER lumen protein retaining receptor	Brite Hierarchies|Protein families: genetic information processing|Membrane trafficking [BR:ko04131]|ER lumen protein retaining receptor
Thraus_T2598	Endonuclease 8 1	END8A_MYCTU	37.288%	1.29e-27	K05522	3.2.2.-|4.2.99.18	Genetic Information Processing|Replication and repair|Base excision repair [PATH:ko03410]|endonuclease VIII [EC:3.2.2.- 4.2.99.18]	Brite Hierarchies|Protein families: genetic information processing|DNA repair and recombination proteins [BR:ko03400]|endonuclease VIII [EC:3.2.2.- 4.2.99.18]
Thraus_T3064	Structural maintenance of chromosomes protein 1	SMC1_SCHPO	71.287%	8.31e-47	K06636	NO_EC_NUMBER	Cellular Processes|Cell growth and death|Cell cycle [PATH:ko04110]|structural maintenance of chromosome 1	Cellular Processes|Cell growth and death|Cell cycle - yeast [PATH:ko04111]|structural maintenance of chromosome 1	Cellular Processes|Cell growth and death|Meiosis - yeast [PATH:ko04113]|structural maintenance of chromosome 1	Cellular Processes|Cell growth and death|Oocyte meiosis [PATH:ko04114]|structural maintenance of chromosome 1	Brite Hierarchies|Protein families: genetic information processing|Chromosome and associated proteins [BR:ko03036]|structural maintenance of chromosome 1
Thraus_T3065	[Skp1-protein]-hydroxyproline N-acetylglucosaminyltransferase	GNT1_DICDI	34.225%	9.59e-23	K12244	2.4.1.229	Brite Hierarchies|Protein families: metabolism|Glycosyltransferases [BR:ko01003]|[Skp1-protein]-hydroxyproline N-acetylglucosaminyltransferase [EC:2.4.1.229]
Thraus_T3063	Retrovirus-related Pol polyprotein from transposon RE1	POLR1_ARATH	30.208%	9.13e-25	NO_KO_DATA	NO_EC_NUMBER	NO_KO_DATA
Thraus_T4098	cAMP-dependent protein kinase catalytic subunit PRKX	PRKX_HUMAN	36.29%	9.63e-38	K19584	2.7.11.11	Brite Hierarchies|Protein families: metabolism|Protein kinases [BR:ko01001]|protein kinase X [EC:2.7.11.11]
Thraus_T4721	Ubiquitin-fold modifier-conjugating enzyme 1	UFC1_ANOGA	65.19%	5.11e-78	K12165	NO_EC_NUMBER	Brite Hierarchies|Protein families: genetic information processing|Ubiquitin system [BR:ko04121]|ufm1-conjugating enzyme 1
Thraus_T2591	Zinc finger CCCH domain-containing protein 45	C3H45_ORYSJ	50%	5.57e-14	K14404	NO_EC_NUMBER	Genetic Information Processing|Translation|mRNA surveillance pathway [PATH:ko03015]|cleavage and polyadenylation specificity factor subunit 4	Human Diseases|Infectious disease: viral|Influenza A [PATH:ko05164]|cleavage and polyadenylation specificity factor subunit 4	Brite Hierarchies|Protein families: genetic information processing|Transcription machinery [BR:ko03021]|cleavage and polyadenylation specificity factor subunit 4	Brite Hierarchies|Protein families: genetic information processing|Messenger RNA biogenesis [BR:ko03019]|cleavage and polyadenylation specificity factor subunit 4
Thraus_T2590	NLR family CARD domain-containing protein 3	NLRC3_HUMAN	51.471%	2.82e-06	K22614	NO_EC_NUMBER	Brite Hierarchies|Protein families: signaling and cellular processes|Pattern recognition receptors [BR:ko04054]|NLR family CARD domain-containing protein 3
Thraus_T2592	Alanine--glyoxylate aminotransferase 2-like {ECO:0000250|UniProtKB:Q8TBG4}	AGT2L_DROME	46.256%	3.1e-125	K14286	4.2.3.2	Metabolism|Lipid metabolism|Glycerophospholipid metabolism [PATH:ko00564]|ethanolamine-phosphate phospho-lyase [EC:4.2.3.2]
Thraus_T2594	tRNA (adenine(37)-N6)-methyltransferase	TRMO_MOUSE	44.275%	8.15e-26	K22900	2.1.1.-	Brite Hierarchies|Protein families: genetic information processing|Transfer RNA biogenesis [BR:ko03016]|tRNA (adenine37-N6)-methyltransferase [EC:2.1.1.-]
Thraus_T3068	Ubiquitin-conjugating enzyme E2 27	UBC27_ARATH	58.947%	1.94e-79	K04649	2.3.2.23	Genetic Information Processing|Folding, sorting and degradation|Ubiquitin mediated proteolysis [PATH:ko04120]|ubiquitin-conjugating enzyme (huntingtin interacting protein 2) [EC:2.3.2.23]	Brite Hierarchies|Protein families: genetic information processing|Ubiquitin system [BR:ko04121]|ubiquitin-conjugating enzyme (huntingtin interacting protein 2) [EC:2.3.2.23]
Thraus_T2596	Palmitoyltransferase ZDHHC17 {ECO:0000305}	ZDH17_RAT	26.408%	7.95e-45	K20032	2.3.1.225	Brite Hierarchies|Protein families: genetic information processing|Membrane trafficking [BR:ko04131]|palmitoyltransferase ZDHHC13/17 [EC:2.3.1.225]
Thraus_T398	Protein YIF1B-B	YF1BB_XENLA	35.047%	1.53e-30	K20362	NO_EC_NUMBER	Brite Hierarchies|Protein families: genetic information processing|Membrane trafficking [BR:ko04131]|protein transport protein YIF1
Thraus_T399	U3 small nucleolar RNA-associated protein 15 homolog	UTP15_XENTR	31.818%	9.61e-42	K14549	NO_EC_NUMBER	Genetic Information Processing|Translation|Ribosome biogenesis in eukaryotes [PATH:ko03008]|U3 small nucleolar RNA-associated protein 15	Brite Hierarchies|Protein families: genetic information processing|Ribosome biogenesis [BR:ko03009]|U3 small nucleolar RNA-associated protein 15
Thraus_T648	Tryptophan biosynthesis protein TRP1	TRPC_PHYPR	41.536%	5.42e-107	NO_KO_DATA	NO_EC_NUMBER	NO_KO_DATA
Thraus_T649	Phosphoadenosine phosphosulfate reductase {ECO:0000255|HAMAP-Rule:MF_00063}	CYSH_SYNP6	53.052%	4.64e-66	K00390	1.8.4.8|1.8.4.10	Metabolism|Energy metabolism|Sulfur metabolism [PATH:ko00920]|phosphoadenosine phosphosulfate reductase [EC:1.8.4.8 1.8.4.10]
Thraus_T2623	Prolyl 4-hydroxylase 1 {ECO:0000305}	P4H1_ARATH	28.947%	3.6e-18	K00472	1.14.11.2	Metabolism|Amino acid metabolism|Arginine and proline metabolism [PATH:ko00330]|prolyl 4-hydroxylase [EC:1.14.11.2]
Thraus_T1938	Palmitoyltransferase erf2	ERFB_ASPFU	42.857%	9.1e-09	K16675	2.3.1.225	Environmental Information Processing|Signal transduction|Hippo signaling pathway - fly [PATH:ko04391]|palmitoyltransferase ZDHHC9/14/18 [EC:2.3.1.225]
Thraus_T2620	Actin-related protein 2/3 complex subunit 1B	ARC1B_ARATH	38.684%	6.02e-80	K05757	NO_EC_NUMBER	Cellular Processes|Transport and catabolism|Endocytosis [PATH:ko04144]|actin related protein 2/3 complex, subunit 1A/1B	Cellular Processes|Cell motility|Regulation of actin cytoskeleton [PATH:ko04810]|actin related protein 2/3 complex, subunit 1A/1B	Organismal Systems|Immune system|Fc gamma R-mediated phagocytosis [PATH:ko04666]|actin related protein 2/3 complex, subunit 1A/1B	Human Diseases|Infectious disease: bacterial|Pathogenic Escherichia coli infection [PATH:ko05130]|actin related protein 2/3 complex, subunit 1A/1B	Human Diseases|Infectious disease: bacterial|Salmonella infection [PATH:ko05132]|actin related protein 2/3 complex, subunit 1A/1B	Human Diseases|Infectious disease: bacterial|Shigellosis [PATH:ko05131]|actin related protein 2/3 complex, subunit 1A/1B	Human Diseases|Infectious disease: bacterial|Bacterial invasion of epithelial cells [PATH:ko05100]|actin related protein 2/3 complex, subunit 1A/1B	Brite Hierarchies|Protein families: genetic information processing|Membrane trafficking [BR:ko04131]|actin related protein 2/3 complex, subunit 1A/1B	Brite Hierarchies|Protein families: signaling and cellular processes|Cytoskeleton proteins [BR:ko04812]|actin related protein 2/3 complex, subunit 1A/1B
Thraus_T390	Actin-histidine N-methyltransferase {ECO:0000305}	SETD3_RAT	24.178%	3.36e-13	K19199	2.1.1.85	Brite Hierarchies|Protein families: signaling and cellular processes|Cytoskeleton proteins [BR:ko04812]|protein-histidine N-methyltransferase [EC:2.1.1.85]
Thraus_T391	Sperm-associated antigen 1	SPAG1_RAT	41.176%	2.77e-12	K19870	NO_EC_NUMBER	Brite Hierarchies|Protein families: genetic information processing|Chromosome and associated proteins [BR:ko03036]|sperm-associated antigen 1
Thraus_T392	Cactin	CATIN_TOXGV	63.309%	1.67e-59	NO_KO_DATA	NO_EC_NUMBER	NO_KO_DATA
Thraus_T641	Protein ACTIVITY OF BC1 COMPLEX KINASE 3, chloroplastic {ECO:0000303|PubMed:23673981}	AB1K3_ARATH	39.1%	8.07e-74	K08869	NO_EC_NUMBER	Brite Hierarchies|Protein families: metabolism|Protein kinases [BR:ko01001]|aarF domain-containing kinase
Thraus_T394	DNA topoisomerase 2-alpha	TOP2A_HUMAN	46.604%	0	K03164	5.6.2.2	Human Diseases|Drug resistance: antineoplastic|Platinum drug resistance [PATH:ko01524]|DNA topoisomerase II [EC:5.6.2.2]	Brite Hierarchies|Protein families: genetic information processing|DNA replication proteins [BR:ko03032]|DNA topoisomerase II [EC:5.6.2.2]	Brite Hierarchies|Protein families: genetic information processing|Chromosome and associated proteins [BR:ko03036]|DNA topoisomerase II [EC:5.6.2.2]
Thraus_T395	ATP-binding cassette sub-family G member 1 {ECO:0000305}	ABCG1_MOUSE	33.21%	1.17e-82	K05679	NO_EC_NUMBER	Environmental Information Processing|Membrane transport|ABC transporters [PATH:ko02010]|ATP-binding cassette, subfamily G (WHITE), member 1	Brite Hierarchies|Protein families: signaling and cellular processes|Transporters [BR:ko02000]|ATP-binding cassette, subfamily G (WHITE), member 1
Thraus_T396	Manganese-transporting ATPase 13A1	AT131_MOUSE	37.179%	5.17e-106	K14950	7.2.2.-	Not Included in Pathway or Brite|Unclassified: metabolism|Enzymes with EC numbers|manganese-transporting P-type ATPase [EC:7.2.2.-]
Thraus_T397	GPI mannosyltransferase 1	PIGM_DICDI	40.816%	1.37e-96	K05284	2.4.1.-	Metabolism|Glycan biosynthesis and metabolism|Glycosylphosphatidylinositol (GPI)-anchor biosynthesis [PATH:ko00563]|GPI mannosyltransferase 1 subunit M [EC:2.4.1.-]	Brite Hierarchies|Protein families: metabolism|Glycosyltransferases [BR:ko01003]|GPI mannosyltransferase 1 subunit M [EC:2.4.1.-]
Thraus_T4419	DExH-box ATP-dependent RNA helicase DExH17 {ECO:0000305}	MER3_ARATH	27.166%	3.34e-22	K15271	3.6.4.12	Brite Hierarchies|Protein families: genetic information processing|DNA repair and recombination proteins [BR:ko03400]|ATP-dependent DNA helicase HFM1/MER3 [EC:3.6.4.12]
Thraus_T4093	Geranylgeranyl transferase type-1 subunit beta	PGTB1_ARATH	42.308%	1.34e-48	K11713	2.5.1.59	Brite Hierarchies|Protein families: metabolism|Prenyltransferases [BR:ko01006]|geranylgeranyl transferase type-1 subunit beta [EC:2.5.1.59]
Thraus_T4009	Arginine biosynthesis bifunctional protein ArgJ, mitochondrial {ECO:0000255|HAMAP-Rule:MF_03124}	ARGJ_PHYIT	46.07%	6.82e-120	K00620	2.3.1.35|2.3.1.1	Metabolism|Amino acid metabolism|Arginine biosynthesis [PATH:ko00220]|glutamate N-acetyltransferase / amino-acid N-acetyltransferase [EC:2.3.1.35 2.3.1.1]
Thraus_T5616	Mitochondrial pyruvate carrier 4 {ECO:0000305}	MPC4_ARATH	58.696%	9.35e-35	K22139	NO_EC_NUMBER	Brite Hierarchies|Protein families: genetic information processing|Mitochondrial biogenesis [BR:ko03029]|mitochondrial pyruvate carrier 2	Brite Hierarchies|Protein families: signaling and cellular processes|Transporters [BR:ko02000]|mitochondrial pyruvate carrier 2
Thraus_T4556	60S ribosomal protein L16	RL16_NEUCR	50.754%	7e-61	K02872	NO_EC_NUMBER	Genetic Information Processing|Translation|Ribosome [PATH:ko03010]|large subunit ribosomal protein L13Ae	Brite Hierarchies|Protein families: genetic information processing|Ribosome [BR:ko03011]|large subunit ribosomal protein L13Ae
Thraus_T3872	GPI-anchor transamidase	GPI8_YEAST	49.458%	1.98e-93	K05290	NO_EC_NUMBER	Metabolism|Glycan biosynthesis and metabolism|Glycosylphosphatidylinositol (GPI)-anchor biosynthesis [PATH:ko00563]|GPI-anchor transamidase subunit K
Thraus_T4555	NAD-dependent deacetylase sir2D	SIR2D_DICDI	46.565%	2.41e-76	K11411	2.3.1.286	Metabolism|Metabolism of cofactors and vitamins|Nicotinate and nicotinamide metabolism [PATH:ko00760]|NAD+-dependent protein deacetylase sirtuin 1 [EC:2.3.1.286]	Environmental Information Processing|Signal transduction|FoxO signaling pathway [PATH:ko04068]|NAD+-dependent protein deacetylase sirtuin 1 [EC:2.3.1.286]	Environmental Information Processing|Signal transduction|AMPK signaling pathway [PATH:ko04152]|NAD+-dependent protein deacetylase sirtuin 1 [EC:2.3.1.286]	Cellular Processes|Cell growth and death|Cellular senescence [PATH:ko04218]|NAD+-dependent protein deacetylase sirtuin 1 [EC:2.3.1.286]	Organismal Systems|Endocrine system|Glucagon signaling pathway [PATH:ko04922]|NAD+-dependent protein deacetylase sirtuin 1 [EC:2.3.1.286]	Organismal Systems|Aging|Longevity regulating pathway [PATH:ko04211]|NAD+-dependent protein deacetylase sirtuin 1 [EC:2.3.1.286]	Organismal Systems|Aging|Longevity regulating pathway - worm [PATH:ko04212]|NAD+-dependent protein deacetylase sirtuin 1 [EC:2.3.1.286]	Organismal Systems|Aging|Longevity regulating pathway - multiple species [PATH:ko04213]|NAD+-dependent protein deacetylase sirtuin 1 [EC:2.3.1.286]	Human Diseases|Cancer: overview|MicroRNAs in cancer [PATH:ko05206]|NAD+-dependent protein deacetylase sirtuin 1 [EC:2.3.1.286]	Human Diseases|Substance dependence|Amphetamine addiction [PATH:ko05031]|NAD+-dependent protein deacetylase sirtuin 1 [EC:2.3.1.286]	Brite Hierarchies|Protein families: genetic information processing|Chromosome and associated proteins [BR:ko03036]|NAD+-dependent protein deacetylase sirtuin 1 [EC:2.3.1.286]	Brite Hierarchies|Protein families: genetic information processing|Mitochondrial biogenesis [BR:ko03029]|NAD+-dependent protein deacetylase sirtuin 1 [EC:2.3.1.286]
Thraus_T248	SUMO-activating enzyme subunit 2	SAE2_ARATH	41.779%	5.7e-112	K10685	6.2.1.45	Genetic Information Processing|Folding, sorting and degradation|Ubiquitin mediated proteolysis [PATH:ko04120]|ubiquitin-like 1-activating enzyme E1 B [EC:6.2.1.45]	Brite Hierarchies|Protein families: genetic information processing|Ubiquitin system [BR:ko04121]|ubiquitin-like 1-activating enzyme E1 B [EC:6.2.1.45]
Thraus_T249	Lariat debranching enzyme	DBR1_HUMAN	54.114%	1.5e-103	K18328	3.1.-.-	Brite Hierarchies|Protein families: genetic information processing|Ribosome biogenesis [BR:ko03009]|lariat debranching enzyme [EC:3.1.-.-]
Thraus_T246	Hexokinase-6	HXK6_ORYSJ	37.702%	1.34e-81	K00844	2.7.1.1	Metabolism|Carbohydrate metabolism|Glycolysis / Gluconeogenesis [PATH:ko00010]|hexokinase [EC:2.7.1.1]	Metabolism|Carbohydrate metabolism|Fructose and mannose metabolism [PATH:ko00051]|hexokinase [EC:2.7.1.1]	Metabolism|Carbohydrate metabolism|Galactose metabolism [PATH:ko00052]|hexokinase [EC:2.7.1.1]	Metabolism|Carbohydrate metabolism|Starch and sucrose metabolism [PATH:ko00500]|hexokinase [EC:2.7.1.1]	Metabolism|Carbohydrate metabolism|Amino sugar and nucleotide sugar metabolism [PATH:ko00520]|hexokinase [EC:2.7.1.1]	Metabolism|Biosynthesis of other secondary metabolites|Streptomycin biosynthesis [PATH:ko00521]|hexokinase [EC:2.7.1.1]	Metabolism|Biosynthesis of other secondary metabolites|Neomycin, kanamycin and gentamicin biosynthesis [PATH:ko00524]|hexokinase [EC:2.7.1.1]	Environmental Information Processing|Signal transduction|HIF-1 signaling pathway [PATH:ko04066]|hexokinase [EC:2.7.1.1]	Organismal Systems|Endocrine system|Insulin signaling pathway [PATH:ko04910]|hexokinase [EC:2.7.1.1]	Organismal Systems|Digestive system|Carbohydrate digestion and absorption [PATH:ko04973]|hexokinase [EC:2.7.1.1]	Human Diseases|Cancer: overview|Central carbon metabolism in cancer [PATH:ko05230]|hexokinase [EC:2.7.1.1]	Human Diseases|Endocrine and metabolic disease|Type II diabetes mellitus [PATH:ko04930]|hexokinase [EC:2.7.1.1]	Human Diseases|Infectious disease: bacterial|Shigellosis [PATH:ko05131]|hexokinase [EC:2.7.1.1]	Brite Hierarchies|Protein families: genetic information processing|Membrane trafficking [BR:ko04131]|hexokinase [EC:2.7.1.1]
Thraus_T247	Gamma-tubulin complex component 3	GCP3_MOUSE	40.494%	1.34e-126	K16570	NO_EC_NUMBER	Brite Hierarchies|Protein families: genetic information processing|Chromosome and associated proteins [BR:ko03036]|gamma-tubulin complex component 3	Brite Hierarchies|Protein families: signaling and cellular processes|Cytoskeleton proteins [BR:ko04812]|gamma-tubulin complex component 3	Brite Hierarchies|Protein families: signaling and cellular processes|Exosome [BR:ko04147]|gamma-tubulin complex component 3
Thraus_T244	Lysine-specific demethylase 5A	KDM5A_MOUSE	51.915%	1.84e-70	K11446	1.14.11.67	Brite Hierarchies|Protein families: metabolism|Protein phosphatases and associated proteins [BR:ko01009]|[histone H3]-trimethyl-L-lysine4 demethylase [EC:1.14.11.67]	Brite Hierarchies|Protein families: genetic information processing|Chromosome and associated proteins [BR:ko03036]|[histone H3]-trimethyl-L-lysine4 demethylase [EC:1.14.11.67]
Thraus_T245	Vacuolar protein sorting-associated protein 53 A	VP53A_ARATH	31.826%	5.38e-69	K20299	NO_EC_NUMBER	Brite Hierarchies|Protein families: genetic information processing|Membrane trafficking [BR:ko04131]|vacuolar protein sorting-associated protein 53
Thraus_T242	Importin subunit alpha	IMA_DROME	53.846%	1.5e-08	K15043	NO_EC_NUMBER	Human Diseases|Infectious disease: viral|Influenza A [PATH:ko05164]|importin subunit alpha-1/8	Brite Hierarchies|Protein families: genetic information processing|Chromosome and associated proteins [BR:ko03036]|importin subunit alpha-1/8
Thraus_T243	Probable protein phosphatase 2C 35	P2C35_ARATH	46.358%	1.61e-73	NO_KO_DATA	NO_EC_NUMBER	NO_KO_DATA
Thraus_T240	Zinc finger protein CONSTANS-LIKE 16	COL16_ARATH	43.103%	1.96e-07	NO_KO_DATA	NO_EC_NUMBER	NO_KO_DATA
Thraus_T241	Putative transposase R104	YR104_MIMIV	50.704%	2.59e-18	NO_KO_DATA	NO_EC_NUMBER	NO_KO_DATA
Thraus_T4412	Lysine--tRNA ligase {ECO:0000255|HAMAP-Rule:MF_00252}	SYK_GRAFK	33.468%	3.37e-78	K04567	6.1.1.6	Genetic Information Processing|Translation|Aminoacyl-tRNA biosynthesis [PATH:ko00970]|lysyl-tRNA synthetase, class II [EC:6.1.1.6]	Brite Hierarchies|Protein families: metabolism|Amino acid related enzymes [BR:ko01007]|lysyl-tRNA synthetase, class II [EC:6.1.1.6]	Brite Hierarchies|Protein families: genetic information processing|Transfer RNA biogenesis [BR:ko03016]|lysyl-tRNA synthetase, class II [EC:6.1.1.6]
Thraus_T4413	CAAX prenyl protease 2	FACE2_DROME	38.76%	6.35e-21	K08658	3.4.22.-	Metabolism|Metabolism of terpenoids and polyketides|Terpenoid backbone biosynthesis [PATH:ko00900]|prenyl protein peptidase [EC:3.4.22.-]	Brite Hierarchies|Protein families: metabolism|Peptidases and inhibitors [BR:ko01002]|prenyl protein peptidase [EC:3.4.22.-]
Thraus_T4559	Transcription factor IIIB 90 kDa subunit	TF3B_MOUSE	46.233%	1.21e-74	NO_KO_DATA	NO_EC_NUMBER	NO_KO_DATA
Thraus_T3226	Very-long-chain 3-oxoacyl-CoA reductase 1	KCR1_ARATH	41.221%	1.18e-65	K10251	1.1.1.62|1.1.1.330	Metabolism|Lipid metabolism|Fatty acid elongation [PATH:ko00062]|17beta-estradiol 17-dehydrogenase / very-long-chain 3-oxoacyl-CoA reductase [EC:1.1.1.62 1.1.1.330]	Metabolism|Lipid metabolism|Steroid hormone biosynthesis [PATH:ko00140]|17beta-estradiol 17-dehydrogenase / very-long-chain 3-oxoacyl-CoA reductase [EC:1.1.1.62 1.1.1.330]	Metabolism|Lipid metabolism|Biosynthesis of unsaturated fatty acids [PATH:ko01040]|17beta-estradiol 17-dehydrogenase / very-long-chain 3-oxoacyl-CoA reductase [EC:1.1.1.62 1.1.1.330]	Brite Hierarchies|Protein families: metabolism|Lipid biosynthesis proteins [BR:ko01004]|17beta-estradiol 17-dehydrogenase / very-long-chain 3-oxoacyl-CoA reductase [EC:1.1.1.62 1.1.1.330]
Thraus_T3091	Probable rRNA-processing protein ebp2	EBP2_SCHPO	38.021%	4.69e-25	K14823	NO_EC_NUMBER	Brite Hierarchies|Protein families: genetic information processing|Ribosome biogenesis [BR:ko03009]|rRNA-processing protein EBP2
Thraus_T3470	Non-histone chromosomal protein 6	NHP6_ASHGO	55.882%	6.02e-19	NO_KO_DATA	NO_EC_NUMBER	NO_KO_DATA
Thraus_T3473	Upstream activation factor subunit spp27	UAF30_SCHPO	47.945%	5.38e-17	K15223	NO_EC_NUMBER	Brite Hierarchies|Protein families: genetic information processing|Transcription machinery [BR:ko03021]|upstream activation factor subunit UAF30
Thraus_T3472	SNF1-related protein kinase catalytic subunit alpha KIN10 {ECO:0000305}	KIN10_ARATH	59.259%	2.3e-125	K07198	2.7.11.11	Environmental Information Processing|Signal transduction|Apelin signaling pathway [PATH:ko04371]|5'-AMP-activated protein kinase, catalytic alpha subunit [EC:2.7.11.11]	Environmental Information Processing|Signal transduction|FoxO signaling pathway [PATH:ko04068]|5'-AMP-activated protein kinase, catalytic alpha subunit [EC:2.7.11.11]	Environmental Information Processing|Signal transduction|PI3K-Akt signaling pathway [PATH:ko04151]|5'-AMP-activated protein kinase, catalytic alpha subunit [EC:2.7.11.11]	Environmental Information Processing|Signal transduction|AMPK signaling pathway [PATH:ko04152]|5'-AMP-activated protein kinase, catalytic alpha subunit [EC:2.7.11.11]	Environmental Information Processing|Signal transduction|mTOR signaling pathway [PATH:ko04150]|5'-AMP-activated protein kinase, catalytic alpha subunit [EC:2.7.11.11]	Cellular Processes|Transport and catabolism|Autophagy - animal [PATH:ko04140]|5'-AMP-activated protein kinase, catalytic alpha subunit [EC:2.7.11.11]	Cellular Processes|Cellular community - eukaryotes|Tight junction [PATH:ko04530]|5'-AMP-activated protein kinase, catalytic alpha subunit [EC:2.7.11.11]	Organismal Systems|Endocrine system|Insulin signaling pathway [PATH:ko04910]|5'-AMP-activated protein kinase, catalytic alpha subunit [EC:2.7.11.11]	Organismal Systems|Endocrine system|Glucagon signaling pathway [PATH:ko04922]|5'-AMP-activated protein kinase, catalytic alpha subunit [EC:2.7.11.11]	Organismal Systems|Endocrine system|Adipocytokine signaling pathway [PATH:ko04920]|5'-AMP-activated protein kinase, catalytic alpha subunit [EC:2.7.11.11]	Organismal Systems|Endocrine system|Oxytocin signaling pathway [PATH:ko04921]|5'-AMP-activated protein kinase, catalytic alpha subunit [EC:2.7.11.11]	Organismal Systems|Development and regeneration|Axon regeneration [PATH:ko04361]|5'-AMP-activated protein kinase, catalytic alpha subunit [EC:2.7.11.11]	Organismal Systems|Aging|Longevity regulating pathway [PATH:ko04211]|5'-AMP-activated protein kinase, catalytic alpha subunit [EC:2.7.11.11]	Organismal Systems|Aging|Longevity regulating pathway - multiple species [PATH:ko04213]|5'-AMP-activated protein kinase, catalytic alpha subunit [EC:2.7.11.11]	Organismal Systems|Environmental adaptation|Circadian rhythm [PATH:ko04710]|5'-AMP-activated protein kinase, catalytic alpha subunit [EC:2.7.11.11]	Organismal Systems|Environmental adaptation|Thermogenesis [PATH:ko04714]|5'-AMP-activated protein kinase, catalytic alpha subunit [EC:2.7.11.11]	Human Diseases|Cardiovascular disease|Fluid shear stress and atherosclerosis [PATH:ko05418]|5'-AMP-activated protein kinase, catalytic alpha subunit [EC:2.7.11.11]	Human Diseases|Cardiovascular disease|Hypertrophic cardiomyopathy (HCM) [PATH:ko05410]|5'-AMP-activated protein kinase, catalytic alpha subunit [EC:2.7.11.11]	Human Diseases|Endocrine and metabolic disease|Non-alcoholic fatty liver disease (NAFLD) [PATH:ko04932]|5'-AMP-activated protein kinase, catalytic alpha subunit [EC:2.7.11.11]	Human Diseases|Endocrine and metabolic disease|Insulin resistance [PATH:ko04931]|5'-AMP-activated protein kinase, catalytic alpha subunit [EC:2.7.11.11]	Brite Hierarchies|Protein families: metabolism|Protein kinases [BR:ko01001]|5'-AMP-activated protein kinase, catalytic alpha subunit [EC:2.7.11.11]	Brite Hierarchies|Protein families: genetic information processing|Membrane trafficking [BR:ko04131]|5'-AMP-activated protein kinase, catalytic alpha subunit [EC:2.7.11.11]	Brite Hierarchies|Protein families: genetic information processing|Mitochondrial biogenesis [BR:ko03029]|5'-AMP-activated protein kinase, catalytic alpha subunit [EC:2.7.11.11]
Thraus_T3475	Putative oxidoreductase TDA3	TDA3_YEAST	26.943%	2.08e-10	NO_KO_DATA	NO_EC_NUMBER	NO_KO_DATA
Thraus_T3474	Nitrile-specifier protein 5	NSP5_ARATH	35.404%	1.65e-24	NO_KO_DATA	NO_EC_NUMBER	NO_KO_DATA
Thraus_T3477	Phosphatidylinositol 4-kinase gamma 4	P4KG4_ARATH	38.117%	1.97e-31	NO_KO_DATA	NO_EC_NUMBER	NO_KO_DATA
Thraus_T3476	Centrosomal protein of 164 kDa	CE164_HUMAN	54.118%	4.87e-28	K16462	NO_EC_NUMBER	Brite Hierarchies|Protein families: genetic information processing|Chromosome and associated proteins [BR:ko03036]|centrosomal protein CEP164
Thraus_T3479	Acyl-CoA synthetase short-chain family member 3, mitochondrial	ACSS3_MOUSE	42.205%	1.35e-152	K01908	6.2.1.17	Metabolism|Carbohydrate metabolism|Propanoate metabolism [PATH:ko00640]|propionyl-CoA synthetase [EC:6.2.1.17]	Brite Hierarchies|Protein families: metabolism|Lipid biosynthesis proteins [BR:ko01004]|propionyl-CoA synthetase [EC:6.2.1.17]
Thraus_T3478	Kinesin-like protein KIN-14N {ECO:0000305}	KN14N_ARATH	47.074%	1.76e-106	K10405	NO_EC_NUMBER	Brite Hierarchies|Protein families: genetic information processing|Chromosome and associated proteins [BR:ko03036]|kinesin family member C1	Brite Hierarchies|Protein families: signaling and cellular processes|Cytoskeleton proteins [BR:ko04812]|kinesin family member C1
Thraus_T2175	Long-chain-alcohol dehydrogenase 1	ADH1_GEOTN	39.266%	4.62e-49	K19954	1.1.1.-	Not Included in Pathway or Brite|Unclassified: metabolism|Enzymes with EC numbers|alcohol dehydrogenase [EC:1.1.1.-]
Thraus_T5349	Probable prolyl 4-hydroxylase 10 {ECO:0000305}	P4H10_ARATH	41.27%	9.29e-23	K00472	1.14.11.2	Metabolism|Amino acid metabolism|Arginine and proline metabolism [PATH:ko00330]|prolyl 4-hydroxylase [EC:1.14.11.2]
Thraus_T4417	Membrin-11	MEM11_ARATH	38.318%	1.66e-13	K08496	NO_EC_NUMBER	Genetic Information Processing|Folding, sorting and degradation|SNARE interactions in vesicular transport [PATH:ko04130]|golgi SNAP receptor complex member 2	Brite Hierarchies|Protein families: genetic information processing|Membrane trafficking [BR:ko04131]|golgi SNAP receptor complex member 2
Thraus_T5613	Serine/threonine-protein kinase TIO	TIO_ARATH	66.537%	1.76e-117	K06228	2.7.11.1	Environmental Information Processing|Signal transduction|Hedgehog signaling pathway - fly [PATH:ko04341]|fused [EC:2.7.11.1]	Brite Hierarchies|Protein families: metabolism|Protein kinases [BR:ko01001]|fused [EC:2.7.11.1]
Thraus_T3731	GTPase-activating protein gyp1	GYP1_SCHPO	55.921%	1.52e-58	K20360	NO_EC_NUMBER	Brite Hierarchies|Protein families: genetic information processing|Membrane trafficking [BR:ko04131]|TBC1 domain family member 2
Thraus_T4415	EH domain-containing protein 1 {ECO:0000305}	EHD1_BOVIN	50.685%	4.71e-178	K12483	NO_EC_NUMBER	Cellular Processes|Transport and catabolism|Endocytosis [PATH:ko04144]|EH domain-containing protein 1	Brite Hierarchies|Protein families: genetic information processing|Membrane trafficking [BR:ko04131]|EH domain-containing protein 1	Brite Hierarchies|Protein families: signaling and cellular processes|Exosome [BR:ko04147]|EH domain-containing protein 1
Thraus_T3227	Probable 1-acylglycerol-3-phosphate O-acyltransferase	LPAAT_ORYSJ	34.496%	1.2e-37	K13699	2.3.1.51	Organismal Systems|Endocrine system|Regulation of lipolysis in adipocytes [PATH:ko04923]|abhydrolase domain-containing protein 5 [EC:2.3.1.51]	Brite Hierarchies|Protein families: metabolism|Peptidases and inhibitors [BR:ko01002]|abhydrolase domain-containing protein 5 [EC:2.3.1.51]	Brite Hierarchies|Protein families: metabolism|Lipid biosynthesis proteins [BR:ko01004]|abhydrolase domain-containing protein 5 [EC:2.3.1.51]
Thraus_T4620	Imidazolonepropionase {ECO:0000255|HAMAP-Rule:MF_00372}	HUTI_HYPNA	44.518%	4.73e-57	K01468	3.5.2.7	Metabolism|Amino acid metabolism|Histidine metabolism [PATH:ko00340]|imidazolonepropionase [EC:3.5.2.7]
Thraus_T4627	Sulfoacetaldehyde dehydrogenase (acylating)	SAUS_CUPNH	40.048%	3.05e-90	K15515	1.2.1.81	Not Included in Pathway or Brite|Unclassified: metabolism|Enzymes with EC numbers|sulfoacetaldehyde dehydrogenase [EC:1.2.1.81]
Thraus_T2171	Dynein assembly factor 6, axonemal {ECO:0000312|HGNC:HGNC:28570}	DAAF6_HUMAN	32.653%	6.89e-16	NO_KO_DATA	NO_EC_NUMBER	NO_KO_DATA
Thraus_T3735	Serine incorporator 3	SERC3_BOVIN	26.38%	1.97e-29	K23544	NO_EC_NUMBER	Brite Hierarchies|Protein families: genetic information processing|Membrane trafficking [BR:ko04131]|serine incorporator 1/3
Thraus_T5524	Glutathione synthetase, chloroplastic	GSHB_ARATH	46.369%	1.29e-93	K21456	6.3.2.3	Metabolism|Amino acid metabolism|Cysteine and methionine metabolism [PATH:ko00270]|glutathione synthase [EC:6.3.2.3]	Metabolism|Metabolism of other amino acids|Glutathione metabolism [PATH:ko00480]|glutathione synthase [EC:6.3.2.3]	Cellular Processes|Cell growth and death|Ferroptosis [PATH:ko04216]|glutathione synthase [EC:6.3.2.3]	Brite Hierarchies|Protein families: signaling and cellular processes|Exosome [BR:ko04147]|glutathione synthase [EC:6.3.2.3]
Thraus_T2133	Histidinol dehydrogenase {ECO:0000255|HAMAP-Rule:MF_01024}	HISX_THET2	44.192%	3.86e-70	K00013	1.1.1.23	Metabolism|Amino acid metabolism|Histidine metabolism [PATH:ko00340]|histidinol dehydrogenase [EC:1.1.1.23]
Thraus_T2132	Probable WRKY transcription factor 19	WRK19_ARATH	46.154%	2.74e-52	NO_KO_DATA	NO_EC_NUMBER	NO_KO_DATA
Thraus_T2131	D-inositol 3-phosphate glycosyltransferase	MSHA_XYLCX	34.694%	1.72e-09	K15521	2.4.1.250	Not Included in Pathway or Brite|Unclassified: metabolism|Enzymes with EC numbers|D-inositol-3-phosphate glycosyltransferase [EC:2.4.1.250]
Thraus_T2137	Inositol monophosphatase 2	IMP2_SOLLC	36.426%	9.93e-40	K10047	3.1.3.25|3.1.3.93	Metabolism|Carbohydrate metabolism|Ascorbate and aldarate metabolism [PATH:ko00053]|inositol-phosphate phosphatase / L-galactose 1-phosphate phosphatase [EC:3.1.3.25 3.1.3.93]	Metabolism|Carbohydrate metabolism|Inositol phosphate metabolism [PATH:ko00562]|inositol-phosphate phosphatase / L-galactose 1-phosphate phosphatase [EC:3.1.3.25 3.1.3.93]	Environmental Information Processing|Signal transduction|Phosphatidylinositol signaling system [PATH:ko04070]|inositol-phosphate phosphatase / L-galactose 1-phosphate phosphatase [EC:3.1.3.25 3.1.3.93]
Thraus_T2136	Carboxypeptidase 1	CBP1_BACSU	35.799%	6.67e-63	K01299	3.4.17.19	Brite Hierarchies|Protein families: metabolism|Peptidases and inhibitors [BR:ko01002]|carboxypeptidase Taq [EC:3.4.17.19]
Thraus_T2135	Probable formaldehyde dehydrogenase AdhA	ADHA_BACSU	41.783%	1.83e-87	K13979	1.-.-.-	Not Included in Pathway or Brite|Unclassified: metabolism|Enzymes with EC numbers|uncharacterized zinc-type alcohol dehydrogenase-like protein [EC:1.-.-.-]
Thraus_T2134	Tetratricopeptide repeat protein 29	TTC29_HUMAN	24.163%	3.38e-10	NO_KO_DATA	NO_EC_NUMBER	NO_KO_DATA
Thraus_T2139	Endonuclease III homolog {ECO:0000255|HAMAP-Rule:MF_03183}	NTH_SCHPO	52.432%	5.71e-59	K10773	4.2.99.18	Genetic Information Processing|Replication and repair|Base excision repair [PATH:ko03410]|endonuclease III [EC:4.2.99.18]	Brite Hierarchies|Protein families: genetic information processing|DNA repair and recombination proteins [BR:ko03400]|endonuclease III [EC:4.2.99.18]
Thraus_T4626	Probable isoleucine--tRNA ligase, cytoplasmic	SYIC_DICDI	55.695%	0	K01870	6.1.1.5	Genetic Information Processing|Translation|Aminoacyl-tRNA biosynthesis [PATH:ko00970]|isoleucyl-tRNA synthetase [EC:6.1.1.5]	Brite Hierarchies|Protein families: metabolism|Amino acid related enzymes [BR:ko01007]|isoleucyl-tRNA synthetase [EC:6.1.1.5]	Brite Hierarchies|Protein families: genetic information processing|Transfer RNA biogenesis [BR:ko03016]|isoleucyl-tRNA synthetase [EC:6.1.1.5]
Thraus_T732	Target of rapamycin complex subunit LST8-1 {ECO:0000305}	LST81_ARATH	45.875%	8.16e-79	K08266	NO_EC_NUMBER	Environmental Information Processing|Signal transduction|PI3K-Akt signaling pathway [PATH:ko04151]|target of rapamycin complex subunit LST8	Environmental Information Processing|Signal transduction|mTOR signaling pathway [PATH:ko04150]|target of rapamycin complex subunit LST8	Cellular Processes|Transport and catabolism|Autophagy - animal [PATH:ko04140]|target of rapamycin complex subunit LST8	Cellular Processes|Transport and catabolism|Autophagy - yeast [PATH:ko04138]|target of rapamycin complex subunit LST8	Cellular Processes|Transport and catabolism|Autophagy - other [PATH:ko04136]|target of rapamycin complex subunit LST8	Organismal Systems|Environmental adaptation|Thermogenesis [PATH:ko04714]|target of rapamycin complex subunit LST8	Brite Hierarchies|Protein families: genetic information processing|Membrane trafficking [BR:ko04131]|target of rapamycin complex subunit LST8
Thraus_T2055	ATPase family protein 2 homolog {ECO:0000305}	AFG2H_HUMAN	47.059%	1.03e-124	K14575	NO_EC_NUMBER	Genetic Information Processing|Translation|Ribosome biogenesis in eukaryotes [PATH:ko03008]|AAA family ATPase	Brite Hierarchies|Protein families: genetic information processing|Ribosome biogenesis [BR:ko03009]|AAA family ATPase
Thraus_T730	Vacuolar protein sorting-associated protein 4B	VPS4B_BOVIN	41.139%	1.05e-72	K12196	NO_EC_NUMBER	Cellular Processes|Transport and catabolism|Endocytosis [PATH:ko04144]|vacuolar protein-sorting-associated protein 4	Cellular Processes|Cell growth and death|Necroptosis [PATH:ko04217]|vacuolar protein-sorting-associated protein 4	Brite Hierarchies|Protein families: genetic information processing|Membrane trafficking [BR:ko04131]|vacuolar protein-sorting-associated protein 4
Thraus_T736	Trimethylguanosine synthase	TGS1_MOUSE	43%	1.51e-47	K14292	2.1.1.-	Genetic Information Processing|Translation|RNA transport [PATH:ko03013]|trimethylguanosine synthase [EC:2.1.1.-]
Thraus_T737	Protein-lysine N-methyltransferase {ECO:0000305|PubMed:23086207}	KMT_SULIR	32.258%	3.11e-07	NO_KO_DATA	NO_EC_NUMBER	NO_KO_DATA
Thraus_T2052	Probable flavin mononucleotide-dependent alkene reductase {ECO:0000305|PubMed:27812217}	NTR2_LEIIN	40.498%	3.95e-61	NO_KO_DATA	NO_EC_NUMBER	NO_KO_DATA
Thraus_T735	Acyl-lipid (8-3)-desaturase	D5FAD_MORAP	37.5%	1.69e-10	NO_KO_DATA	NO_EC_NUMBER	NO_KO_DATA
Thraus_T738	AP-1 complex subunit sigma-2	AP1S2_ARATH	63.566%	6.69e-57	K12394	NO_EC_NUMBER	Cellular Processes|Transport and catabolism|Lysosome [PATH:ko04142]|AP-1 complex subunit sigma 1/2	Human Diseases|Infectious disease: viral|Human immunodeficiency virus 1 infection [PATH:ko05170]|AP-1 complex subunit sigma 1/2	Brite Hierarchies|Protein families: genetic information processing|Membrane trafficking [BR:ko04131]|AP-1 complex subunit sigma 1/2
Thraus_T1683	Peptidyl-prolyl cis-trans isomerase FKBP12	FKB12_VICFA	53.333%	7.4e-11	NO_KO_DATA	NO_EC_NUMBER	NO_KO_DATA
Thraus_T2058	Dihydrolipoyllysine-residue acetyltransferase component 3 of pyruvate dehydrogenase complex, mitochondrial	ODP23_ARATH	42.093%	4.75e-103	K00627	2.3.1.12	Metabolism|Carbohydrate metabolism|Glycolysis / Gluconeogenesis [PATH:ko00010]|pyruvate dehydrogenase E2 component (dihydrolipoamide acetyltransferase) [EC:2.3.1.12]	Metabolism|Carbohydrate metabolism|Citrate cycle (TCA cycle) [PATH:ko00020]|pyruvate dehydrogenase E2 component (dihydrolipoamide acetyltransferase) [EC:2.3.1.12]	Metabolism|Carbohydrate metabolism|Pyruvate metabolism [PATH:ko00620]|pyruvate dehydrogenase E2 component (dihydrolipoamide acetyltransferase) [EC:2.3.1.12]
Thraus_T2059	Ankyrin-2 {ECO:0000250|UniProtKB:Q01484}	ANK2_MOUSE	38.503%	7.22e-19	K10380	NO_EC_NUMBER	Organismal Systems|Immune system|Toll and Imd signaling pathway [PATH:ko04624]|ankyrin	Human Diseases|Cancer: overview|Proteoglycans in cancer [PATH:ko05205]|ankyrin	Brite Hierarchies|Protein families: signaling and cellular processes|Cytoskeleton proteins [BR:ko04812]|ankyrin
Thraus_T3989	DNA-directed RNA polymerase II subunit rpb1	RPB1_DICDI	67.027%	4.86e-159	K03006	2.7.7.6	Genetic Information Processing|Transcription|RNA polymerase [PATH:ko03020]|DNA-directed RNA polymerase II subunit RPB1 [EC:2.7.7.6]	Human Diseases|Neurodegenerative disease|Huntington disease [PATH:ko05016]|DNA-directed RNA polymerase II subunit RPB1 [EC:2.7.7.6]	Brite Hierarchies|Protein families: genetic information processing|Transcription machinery [BR:ko03021]|DNA-directed RNA polymerase II subunit RPB1 [EC:2.7.7.6]	Brite Hierarchies|Protein families: genetic information processing|DNA repair and recombination proteins [BR:ko03400]|DNA-directed RNA polymerase II subunit RPB1 [EC:2.7.7.6]
Thraus_T3988	Metal tolerance protein 8	MTP8_ORYSJ	44.218%	5.07e-63	K14692	NO_EC_NUMBER	Brite Hierarchies|Protein families: signaling and cellular processes|Transporters [BR:ko02000]|solute carrier family 30 (zinc transporter), member 5/7
Thraus_T3577	Fructose-1,6-bisphosphatase, cytosolic	F16P2_SACHY	52.258%	9.48e-105	NO_KO_DATA	NO_EC_NUMBER	NO_KO_DATA
Thraus_T3980	T-complex protein 1 subunit alpha {ECO:0000303|PubMed:11599560}	TCPA_ARATH	58.444%	0	K09493	NO_EC_NUMBER	Brite Hierarchies|Protein families: genetic information processing|Chaperones and folding catalysts [BR:ko03110]|T-complex protein 1 subunit alpha	Brite Hierarchies|Protein families: genetic information processing|Chromosome and associated proteins [BR:ko03036]|T-complex protein 1 subunit alpha	Brite Hierarchies|Protein families: signaling and cellular processes|Exosome [BR:ko04147]|T-complex protein 1 subunit alpha
Thraus_T3983	DNA polymerase epsilon subunit 3	DPOE3_MOUSE	40.909%	2.28e-18	K02326	2.7.7.7	Genetic Information Processing|Replication and repair|DNA replication [PATH:ko03030]|DNA polymerase epsilon subunit 3 [EC:2.7.7.7]	Genetic Information Processing|Replication and repair|Base excision repair [PATH:ko03410]|DNA polymerase epsilon subunit 3 [EC:2.7.7.7]	Genetic Information Processing|Replication and repair|Nucleotide excision repair [PATH:ko03420]|DNA polymerase epsilon subunit 3 [EC:2.7.7.7]	Brite Hierarchies|Protein families: genetic information processing|DNA replication proteins [BR:ko03032]|DNA polymerase epsilon subunit 3 [EC:2.7.7.7]	Brite Hierarchies|Protein families: genetic information processing|Chromosome and associated proteins [BR:ko03036]|DNA polymerase epsilon subunit 3 [EC:2.7.7.7]	Brite Hierarchies|Protein families: genetic information processing|DNA repair and recombination proteins [BR:ko03400]|DNA polymerase epsilon subunit 3 [EC:2.7.7.7]
Thraus_T2178	NAD(P)H-hydrate epimerase {ECO:0000255|HAMAP-Rule:MF_03159}	NNRE_DROWI	48.198%	1.8e-63	K17759	5.1.99.6	Not Included in Pathway or Brite|Unclassified: metabolism|Enzymes with EC numbers|NAD(P)H-hydrate epimerase [EC:5.1.99.6]
Thraus_T3985	Flavohemoprotein {ECO:0000255|HAMAP-Rule:MF_01252}	HMP_PHOPR	31.818%	9.56e-49	K05916	1.14.12.17	Human Diseases|Infectious disease: bacterial|Salmonella infection [PATH:ko05132]|nitric oxide dioxygenase [EC:1.14.12.17]
Thraus_T3984	Protein aardvark	AARA_DICDI	29.841%	4.19e-25	NO_KO_DATA	NO_EC_NUMBER	NO_KO_DATA
Thraus_T3987	WD repeat-containing protein 27	WDR27_HUMAN	28.182%	8.11e-36	NO_KO_DATA	NO_EC_NUMBER	NO_KO_DATA
Thraus_T3986	Protein ENHANCED DISEASE RESISTANCE 2-like	EDR2L_ARATH	36.889%	2.12e-29	NO_KO_DATA	NO_EC_NUMBER	NO_KO_DATA
Thraus_T101	Kinesin heavy chain	KINH_DROME	39.583%	4.07e-17	K10396	NO_EC_NUMBER	Cellular Processes|Transport and catabolism|Endocytosis [PATH:ko04144]|kinesin family member 5	Organismal Systems|Nervous system|Dopaminergic synapse [PATH:ko04728]|kinesin family member 5	Brite Hierarchies|Protein families: genetic information processing|Membrane trafficking [BR:ko04131]|kinesin family member 5	Brite Hierarchies|Protein families: signaling and cellular processes|Cytoskeleton proteins [BR:ko04812]|kinesin family member 5	Brite Hierarchies|Protein families: signaling and cellular processes|Exosome [BR:ko04147]|kinesin family member 5
Thraus_T3879	40S ribosomal protein S27	RS27_SCHPO	84%	1.15e-25	K02978	NO_EC_NUMBER	Genetic Information Processing|Translation|Ribosome [PATH:ko03010]|small subunit ribosomal protein S27e	Brite Hierarchies|Protein families: genetic information processing|Ribosome [BR:ko03011]|small subunit ribosomal protein S27e
Thraus_T3878	40S ribosomal protein S25	RS25_SPOFR	66.216%	3.57e-26	NO_KO_DATA	NO_EC_NUMBER	NO_KO_DATA
Thraus_T100	Serine/threonine-protein kinase RUNKEL {ECO:0000305}	RUK_ARATH	54.891%	3.99e-62	K17545	2.7.11.1	Brite Hierarchies|Protein families: metabolism|Protein kinases [BR:ko01001]|serine/threonine-protein kinase ULK4 [EC:2.7.11.1]
Thraus_T3875	Putative N6-adenosine-methyltransferase MT-A70-like	MTA70_MEDTR	38.462%	5.99e-38	NO_KO_DATA	NO_EC_NUMBER	NO_KO_DATA
Thraus_T3874	Probable protein phosphatase 2C 55	P2C55_ARATH	37.5%	3.7e-12	K17508	3.1.3.16	Brite Hierarchies|Protein families: metabolism|Protein phosphatases and associated proteins [BR:ko01009]|protein phosphatase PTC7 [EC:3.1.3.16]
Thraus_T3877	Vacuolar protein sorting-associated protein 29	VPS29_CHICK	52.5%	1.46e-60	K18467	NO_EC_NUMBER	Cellular Processes|Transport and catabolism|Endocytosis [PATH:ko04144]|vacuolar protein sorting-associated protein 29	Brite Hierarchies|Protein families: genetic information processing|Membrane trafficking [BR:ko04131]|vacuolar protein sorting-associated protein 29
Thraus_T3876	PACRG-like protein	PACRL_HUMAN	41.111%	8.87e-43	NO_KO_DATA	NO_EC_NUMBER	NO_KO_DATA
Thraus_T3871	Probable polyamine transporter At1g31830	PHSB_ARATH	32.275%	6.61e-47	NO_KO_DATA	NO_EC_NUMBER	NO_KO_DATA
Thraus_T103	Exosome complex component RRP4	EXOS2_MOUSE	42.857%	3.1e-55	K03679	NO_EC_NUMBER	Genetic Information Processing|Folding, sorting and degradation|RNA degradation [PATH:ko03018]|exosome complex component RRP4	Brite Hierarchies|Protein families: genetic information processing|Messenger RNA biogenesis [BR:ko03019]|exosome complex component RRP4
Thraus_T3873	Fructose-bisphosphate aldolase 5, cytosolic {ECO:0000305}	ALFC5_ARATH	61.517%	2.67e-141	K01623	4.1.2.13	Metabolism|Carbohydrate metabolism|Glycolysis / Gluconeogenesis [PATH:ko00010]|fructose-bisphosphate aldolase, class I [EC:4.1.2.13]	Metabolism|Carbohydrate metabolism|Pentose phosphate pathway [PATH:ko00030]|fructose-bisphosphate aldolase, class I [EC:4.1.2.13]	Metabolism|Carbohydrate metabolism|Fructose and mannose metabolism [PATH:ko00051]|fructose-bisphosphate aldolase, class I [EC:4.1.2.13]	Metabolism|Energy metabolism|Carbon fixation in photosynthetic organisms [PATH:ko00710]|fructose-bisphosphate aldolase, class I [EC:4.1.2.13]	Metabolism|Energy metabolism|Methane metabolism [PATH:ko00680]|fructose-bisphosphate aldolase, class I [EC:4.1.2.13]	Environmental Information Processing|Signal transduction|HIF-1 signaling pathway [PATH:ko04066]|fructose-bisphosphate aldolase, class I [EC:4.1.2.13]	Brite Hierarchies|Protein families: genetic information processing|Membrane trafficking [BR:ko04131]|fructose-bisphosphate aldolase, class I [EC:4.1.2.13]	Brite Hierarchies|Protein families: genetic information processing|Chromosome and associated proteins [BR:ko03036]|fructose-bisphosphate aldolase, class I [EC:4.1.2.13]	Brite Hierarchies|Protein families: signaling and cellular processes|Exosome [BR:ko04147]|fructose-bisphosphate aldolase, class I [EC:4.1.2.13]
Thraus_T1689	Protein-L-isoaspartate(D-aspartate) O-methyltransferase	PIMT_DANRE	50.893%	1.41e-52	K00573	2.1.1.77	Not Included in Pathway or Brite|Unclassified: metabolism|Enzymes with EC numbers|protein-L-isoaspartate(D-aspartate) O-methyltransferase [EC:2.1.1.77]
Thraus_T102	Fatty acid synthase subunit beta	FAS1_YARLI	39.856%	7.62e-137	K00668	2.3.1.86	Metabolism|Lipid metabolism|Fatty acid biosynthesis [PATH:ko00061]|fatty acid synthase subunit beta, fungi type [EC:2.3.1.86]	Brite Hierarchies|Protein families: metabolism|Lipid biosynthesis proteins [BR:ko01004]|fatty acid synthase subunit beta, fungi type [EC:2.3.1.86]
Thraus_T3509	tRNA (guanine(26)-N(2))-dimethyltransferase	TRM1_MOUSE	37.121%	6.04e-98	K00555	2.1.1.215|2.1.1.216	Brite Hierarchies|Protein families: genetic information processing|Transfer RNA biogenesis [BR:ko03016]|tRNA (guanine26-N2/guanine27-N2)-dimethyltransferase [EC:2.1.1.215 2.1.1.216]
Thraus_T3508	Carnitine O-palmitoyltransferase 1, muscle isoform	CPT1B_RAT	31.056%	1.49e-69	NO_KO_DATA	NO_EC_NUMBER	NO_KO_DATA
Thraus_T3505	ATP-dependent DNA helicase Q-like 5	RQL5_ARATH	53.548%	2.3e-42	K10730	3.6.4.12	Brite Hierarchies|Protein families: genetic information processing|DNA replication proteins [BR:ko03032]|ATP-dependent DNA helicase Q4 [EC:3.6.4.12]	Brite Hierarchies|Protein families: genetic information processing|DNA repair and recombination proteins [BR:ko03400]|ATP-dependent DNA helicase Q4 [EC:3.6.4.12]
Thraus_T3504	Flowering time control protein FY	FY_ARATH	43.779%	1.8e-57	K15542	NO_EC_NUMBER	Genetic Information Processing|Translation|mRNA surveillance pathway [PATH:ko03015]|polyadenylation factor subunit 2	Brite Hierarchies|Protein families: genetic information processing|Messenger RNA biogenesis [BR:ko03019]|polyadenylation factor subunit 2
Thraus_T3507	Calcium/calmodulin-dependent protein kinase type IV	KCC4_RAT	42.857%	1.79e-58	K05869	2.7.11.17	Environmental Information Processing|Signal transduction|Apelin signaling pathway [PATH:ko04371]|calcium/calmodulin-dependent protein kinase IV [EC:2.7.11.17]	Environmental Information Processing|Signal transduction|Calcium signaling pathway [PATH:ko04020]|calcium/calmodulin-dependent protein kinase IV [EC:2.7.11.17]	Environmental Information Processing|Signal transduction|cAMP signaling pathway [PATH:ko04024]|calcium/calmodulin-dependent protein kinase IV [EC:2.7.11.17]	Organismal Systems|Endocrine system|Oxytocin signaling pathway [PATH:ko04921]|calcium/calmodulin-dependent protein kinase IV [EC:2.7.11.17]	Organismal Systems|Endocrine system|Aldosterone synthesis and secretion [PATH:ko04925]|calcium/calmodulin-dependent protein kinase IV [EC:2.7.11.17]	Organismal Systems|Nervous system|Cholinergic synapse [PATH:ko04725]|calcium/calmodulin-dependent protein kinase IV [EC:2.7.11.17]	Organismal Systems|Nervous system|Long-term potentiation [PATH:ko04720]|calcium/calmodulin-dependent protein kinase IV [EC:2.7.11.17]	Organismal Systems|Nervous system|Neurotrophin signaling pathway [PATH:ko04722]|calcium/calmodulin-dependent protein kinase IV [EC:2.7.11.17]	Organismal Systems|Development and regeneration|Osteoclast differentiation [PATH:ko04380]|calcium/calmodulin-dependent protein kinase IV [EC:2.7.11.17]	Organismal Systems|Aging|Longevity regulating pathway [PATH:ko04211]|calcium/calmodulin-dependent protein kinase IV [EC:2.7.11.17]	Human Diseases|Cancer: specific types|Glioma [PATH:ko05214]|calcium/calmodulin-dependent protein kinase IV [EC:2.7.11.17]	Human Diseases|Substance dependence|Amphetamine addiction [PATH:ko05031]|calcium/calmodulin-dependent protein kinase IV [EC:2.7.11.17]	Human Diseases|Substance dependence|Alcoholism [PATH:ko05034]|calcium/calmodulin-dependent protein kinase IV [EC:2.7.11.17]	Brite Hierarchies|Protein families: metabolism|Protein kinases [BR:ko01001]|calcium/calmodulin-dependent protein kinase IV [EC:2.7.11.17]
Thraus_T3506	Calcium-transporting ATPase 1	BACA1_BACC1	38.361%	5.8e-170	K01537	7.2.2.10	Not Included in Pathway or Brite|Unclassified: metabolism|Enzymes with EC numbers|P-type Ca2+ transporter type 2C [EC:7.2.2.10]
Thraus_T3500	Methylsterol monooxygenase 1-2	SMO12_ARATH	32.237%	1.81e-10	K14423	1.14.18.10	Metabolism|Lipid metabolism|Steroid biosynthesis [PATH:ko00100]|plant 4,4-dimethylsterol C-4alpha-methyl-monooxygenase [EC:1.14.18.10]
Thraus_T3503	Formate dehydrogenase {ECO:0000255|HAMAP-Rule:MF_03210, ECO:0000303|PubMed:8484798}	FDH_PSESR	70.455%	9.63e-159	NO_KO_DATA	NO_EC_NUMBER	NO_KO_DATA
Thraus_T104	MOB kinase activator-like 1A	MOB1A_MEDSF	46.465%	4.38e-61	NO_KO_DATA	NO_EC_NUMBER	NO_KO_DATA
Thraus_T3347	T-complex protein 1 subunit theta	TCPQ_DICDI	46.857%	8.33e-171	K09500	NO_EC_NUMBER	Brite Hierarchies|Protein families: genetic information processing|Chaperones and folding catalysts [BR:ko03110]|T-complex protein 1 subunit theta	Brite Hierarchies|Protein families: genetic information processing|Chromosome and associated proteins [BR:ko03036]|T-complex protein 1 subunit theta
Thraus_T107	Uncharacterized protein At5g02240	Y5224_ARATH	36.842%	3.59e-20	NO_KO_DATA	NO_EC_NUMBER	NO_KO_DATA
Thraus_T4503	ATP-dependent DNA helicase MPH1 {ECO:0000250|UniProtKB:P40562}	MPH1_MAGO7	49.356%	2.5e-67	K14635	3.6.4.12	Brite Hierarchies|Protein families: genetic information processing|DNA repair and recombination proteins [BR:ko03400]|ATP-dependent DNA helicase MPH1 [EC:3.6.4.12]
Thraus_T2758	Choline-phosphate cytidylyltransferase 2	CCT2_ARATH	39.286%	1.77e-19	K00968	2.7.7.15	Metabolism|Lipid metabolism|Glycerophospholipid metabolism [PATH:ko00564]|choline-phosphate cytidylyltransferase [EC:2.7.7.15]	Metabolism|Metabolism of other amino acids|Phosphonate and phosphinate metabolism [PATH:ko00440]|choline-phosphate cytidylyltransferase [EC:2.7.7.15]	Human Diseases|Cancer: overview|Choline metabolism in cancer [PATH:ko05231]|choline-phosphate cytidylyltransferase [EC:2.7.7.15]
Thraus_T5610	Phospho-2-dehydro-3-deoxyheptonate aldolase, Phe-sensitive	AROG_ECOLI	51.724%	4.5e-62	K01626	2.5.1.54	Metabolism|Amino acid metabolism|Phenylalanine, tyrosine and tryptophan biosynthesis [PATH:ko00400]|3-deoxy-7-phosphoheptulonate synthase [EC:2.5.1.54]	Cellular Processes|Cellular community - prokaryotes|Quorum sensing [PATH:ko02024]|3-deoxy-7-phosphoheptulonate synthase [EC:2.5.1.54]
Thraus_T4623	Mannose-P-dolichol utilization defect 1 protein	MPU1_MOUSE	34.132%	1.17e-13	NO_KO_DATA	NO_EC_NUMBER	NO_KO_DATA
Thraus_T4084	Probable cytosolic iron-sulfur protein assembly protein CIAO1 {ECO:0000255|HAMAP-Rule:MF_03037}	CIAO1_HUMAN	47.059%	8.03e-89	NO_KO_DATA	NO_EC_NUMBER	NO_KO_DATA
Thraus_T5248	Anaphase spindle elongation protein 1	ASE1_SCHPO	28.436%	5.59e-11	K16732	NO_EC_NUMBER	Brite Hierarchies|Protein families: genetic information processing|Chromosome and associated proteins [BR:ko03036]|protein regulator of cytokinesis 1	Brite Hierarchies|Protein families: signaling and cellular processes|Cytoskeleton proteins [BR:ko04812]|protein regulator of cytokinesis 1
Thraus_T416	U4/U6 small nuclear ribonucleoprotein Prp4	PRP4_HUMAN	43.458%	5.13e-55	K12662	NO_EC_NUMBER	Genetic Information Processing|Transcription|Spliceosome [PATH:ko03040]|U4/U6 small nuclear ribonucleoprotein PRP4	Brite Hierarchies|Protein families: genetic information processing|Spliceosome [BR:ko03041]|U4/U6 small nuclear ribonucleoprotein PRP4
Thraus_T4259	2-aminoethylphosphonate--pyruvate transaminase {ECO:0000255|HAMAP-Rule:MF_01376}	PHNW_HAHCH	25.826%	2.9e-14	K03430	2.6.1.37	Metabolism|Metabolism of other amino acids|Phosphonate and phosphinate metabolism [PATH:ko00440]|2-aminoethylphosphonate-pyruvate transaminase [EC:2.6.1.37]	Brite Hierarchies|Protein families: metabolism|Amino acid related enzymes [BR:ko01007]|2-aminoethylphosphonate-pyruvate transaminase [EC:2.6.1.37]
Thraus_T5120	Serine/threonine-protein kinase StkP	STKP_STRPN	29.57%	2.54e-12	K12132	2.7.11.1	Brite Hierarchies|Protein families: metabolism|Protein kinases [BR:ko01001]|eukaryotic-like serine/threonine-protein kinase [EC:2.7.11.1]
Thraus_T5132	von Willebrand factor A domain-containing protein 8	VWA8_DANRE	43.049%	4.08e-58	NO_KO_DATA	NO_EC_NUMBER	NO_KO_DATA
Thraus_T5133	Kinesin-like protein KIN-14M {ECO:0000305}	KN14M_ARATH	52.078%	6.47e-104	K10405	NO_EC_NUMBER	Brite Hierarchies|Protein families: genetic information processing|Chromosome and associated proteins [BR:ko03036]|kinesin family member C1	Brite Hierarchies|Protein families: signaling and cellular processes|Cytoskeleton proteins [BR:ko04812]|kinesin family member C1
Thraus_T5130	Protein aardvark	AARA_DICDI	38.053%	2.4e-12	NO_KO_DATA	NO_EC_NUMBER	NO_KO_DATA
Thraus_T5131	Solute carrier family 12 member 9	S12A9_XENLA	34.982%	2.39e-85	K14429	NO_EC_NUMBER	Brite Hierarchies|Protein families: signaling and cellular processes|Transporters [BR:ko02000]|solute carrier family 12 (potassium/chloride transporters), member 9
Thraus_T5136	Probable inorganic phosphate transporter 1-7	PHT17_ARATH	24.798%	9.27e-22	K08176	NO_EC_NUMBER	Brite Hierarchies|Protein families: signaling and cellular processes|Transporters [BR:ko02000]|MFS transporter, PHS family, inorganic phosphate transporter
Thraus_T5137	Protein YeeZ	YEEZ_ECOLI	28.571%	3.84e-09	NO_KO_DATA	NO_EC_NUMBER	NO_KO_DATA
Thraus_T5134	Phosphatidylinositol N-acetylglucosaminyltransferase subunit A	PIGA_ARATH	48.564%	3.65e-95	K03857	2.4.1.198	Metabolism|Glycan biosynthesis and metabolism|Glycosylphosphatidylinositol (GPI)-anchor biosynthesis [PATH:ko00563]|phosphatidylinositol N-acetylglucosaminyltransferase subunit A [EC:2.4.1.198]	Brite Hierarchies|Protein families: metabolism|Glycosyltransferases [BR:ko01003]|phosphatidylinositol N-acetylglucosaminyltransferase subunit A [EC:2.4.1.198]
Thraus_T4622	DNA-directed RNA polymerase III subunit RPC8	RPC8_HUMAN	40.667%	9.14e-35	K03022	NO_EC_NUMBER	Genetic Information Processing|Transcription|RNA polymerase [PATH:ko03020]|DNA-directed RNA polymerase III subunit RPC8	Organismal Systems|Immune system|Cytosolic DNA-sensing pathway [PATH:ko04623]|DNA-directed RNA polymerase III subunit RPC8	Brite Hierarchies|Protein families: genetic information processing|Transcription machinery [BR:ko03021]|DNA-directed RNA polymerase III subunit RPC8
Thraus_T5138	Elongation of very long chain fatty acids protein 5 {ECO:0000255|HAMAP-Rule:MF_03205, ECO:0000305}	ELOV5_XENTR	29.439%	4.67e-19	K10244	2.3.1.199	Metabolism|Lipid metabolism|Fatty acid elongation [PATH:ko00062]|elongation of very long chain fatty acids protein 5 [EC:2.3.1.199]	Metabolism|Lipid metabolism|Biosynthesis of unsaturated fatty acids [PATH:ko01040]|elongation of very long chain fatty acids protein 5 [EC:2.3.1.199]	Brite Hierarchies|Protein families: metabolism|Lipid biosynthesis proteins [BR:ko01004]|elongation of very long chain fatty acids protein 5 [EC:2.3.1.199]
Thraus_T5091	RNA-binding protein BRN2 {ECO:0000305}	BRN2L_ARATH	62.651%	1.16e-21	K13207	NO_EC_NUMBER	Brite Hierarchies|Protein families: genetic information processing|Spliceosome [BR:ko03041]|CUG-BP- and ETR3-like factor
Thraus_T3440	Myosin ID heavy chain	MYOD_DICDI	46.494%	8.15e-76	K10356	NO_EC_NUMBER	Human Diseases|Infectious disease: bacterial|Pathogenic Escherichia coli infection [PATH:ko05130]|myosin I	Brite Hierarchies|Protein families: metabolism|Protein phosphatases and associated proteins [BR:ko01009]|myosin I	Brite Hierarchies|Protein families: genetic information processing|Membrane trafficking [BR:ko04131]|myosin I	Brite Hierarchies|Protein families: genetic information processing|Chromosome and associated proteins [BR:ko03036]|myosin I	Brite Hierarchies|Protein families: signaling and cellular processes|Cytoskeleton proteins [BR:ko04812]|myosin I	Brite Hierarchies|Protein families: signaling and cellular processes|Exosome [BR:ko04147]|myosin I
Thraus_T813	Mitochondrial carnitine/acylcarnitine carrier protein	MCAT_MOUSE	49.59%	8.7e-78	K15109	NO_EC_NUMBER	Organismal Systems|Environmental adaptation|Thermogenesis [PATH:ko04714]|solute carrier family 25 (mitochondrial carnitine/acylcarnitine transporter), member 20/29	Brite Hierarchies|Protein families: signaling and cellular processes|Transporters [BR:ko02000]|solute carrier family 25 (mitochondrial carnitine/acylcarnitine transporter), member 20/29
Thraus_T812	Charged multivesicular body protein 4b	CHM4B_XENTR	39.85%	9.56e-16	K12194	NO_EC_NUMBER	Cellular Processes|Transport and catabolism|Endocytosis [PATH:ko04144]|charged multivesicular body protein 4	Cellular Processes|Cell growth and death|Necroptosis [PATH:ko04217]|charged multivesicular body protein 4	Brite Hierarchies|Protein families: genetic information processing|Membrane trafficking [BR:ko04131]|charged multivesicular body protein 4	Brite Hierarchies|Protein families: signaling and cellular processes|Exosome [BR:ko04147]|charged multivesicular body protein 4
Thraus_T811	Soluble calcium-activated nucleotidase 1	CANT1_RAT	35.78%	1.39e-51	K12304	3.6.1.6	Metabolism|Nucleotide metabolism|Purine metabolism [PATH:ko00230]|soluble calcium-activated nucleotidase 1 [EC:3.6.1.6]	Metabolism|Nucleotide metabolism|Pyrimidine metabolism [PATH:ko00240]|soluble calcium-activated nucleotidase 1 [EC:3.6.1.6]
Thraus_T810	Uridine kinase {ECO:0000255|HAMAP-Rule:MF_00551}	URK_GEOSW	62.745%	3.47e-39	K00876	2.7.1.48	Metabolism|Nucleotide metabolism|Pyrimidine metabolism [PATH:ko00240]|uridine kinase [EC:2.7.1.48]	Metabolism|Xenobiotics biodegradation and metabolism|Drug metabolism - other enzymes [PATH:ko00983]|uridine kinase [EC:2.7.1.48]
Thraus_T817	Cilia- and flagella-associated protein 45 {ECO:0000305}	CFA45_CHLRE	32.494%	4.85e-11	NO_KO_DATA	NO_EC_NUMBER	NO_KO_DATA
Thraus_T816	Ribosome assembly protein 1	RIA1_SCHPO	39.156%	2.67e-139	K14536	3.6.5.-	Genetic Information Processing|Translation|Ribosome biogenesis in eukaryotes [PATH:ko03008]|ribosome assembly protein 1 [EC:3.6.5.-]	Brite Hierarchies|Protein families: genetic information processing|Ribosome biogenesis [BR:ko03009]|ribosome assembly protein 1 [EC:3.6.5.-]
Thraus_T815	40S ribosomal protein S2	RS2_DROME	62.896%	6.82e-93	K02981	NO_EC_NUMBER	Genetic Information Processing|Translation|Ribosome [PATH:ko03010]|small subunit ribosomal protein S2e	Brite Hierarchies|Protein families: genetic information processing|Ribosome [BR:ko03011]|small subunit ribosomal protein S2e
Thraus_T4666	ATP-dependent RNA helicase DHX30 {ECO:0000305}	DHX30_CHICK	35.584%	3.03e-111	K13185	3.6.4.13	Brite Hierarchies|Protein families: genetic information processing|Spliceosome [BR:ko03041]|ATP-dependent RNA helicase DHX30 [EC:3.6.4.13]	Brite Hierarchies|Protein families: genetic information processing|Mitochondrial biogenesis [BR:ko03029]|ATP-dependent RNA helicase DHX30 [EC:3.6.4.13]
Thraus_T4669	Ecotropic viral integration site 5 protein homolog	EVI5_HUMAN	31.544%	1.37e-43	K20242	NO_EC_NUMBER	Brite Hierarchies|Protein families: genetic information processing|Membrane trafficking [BR:ko04131]|ecotropic viral integration site 5 protein
Thraus_T4668	Phenylalanine--tRNA ligase beta subunit	SYFB_DROME	44.216%	3.1e-165	K01890	6.1.1.20	Genetic Information Processing|Translation|Aminoacyl-tRNA biosynthesis [PATH:ko00970]|phenylalanyl-tRNA synthetase beta chain [EC:6.1.1.20]	Brite Hierarchies|Protein families: metabolism|Amino acid related enzymes [BR:ko01007]|phenylalanyl-tRNA synthetase beta chain [EC:6.1.1.20]	Brite Hierarchies|Protein families: genetic information processing|Transfer RNA biogenesis [BR:ko03016]|phenylalanyl-tRNA synthetase beta chain [EC:6.1.1.20]
Thraus_T819	Uncharacterized protein MJ0678	Y678_METJA	24.103%	5.62e-07	NO_KO_DATA	NO_EC_NUMBER	NO_KO_DATA
Thraus_T818	Alkylglycerol monooxygenase	ALKMO_HUMAN	43.071%	7.21e-70	K15537	1.14.16.5	Not Included in Pathway or Brite|Unclassified: metabolism|Enzymes with EC numbers|alkylglycerol monooxygenase [EC:1.14.16.5]
Thraus_T2960	[Skp1-protein]-hydroxyproline N-acetylglucosaminyltransferase	GNT1_DICDI	27.547%	1.42e-16	K12244	2.4.1.229	Brite Hierarchies|Protein families: metabolism|Glycosyltransferases [BR:ko01003]|[Skp1-protein]-hydroxyproline N-acetylglucosaminyltransferase [EC:2.4.1.229]
Thraus_T2838	Methionine synthase	METH_DICDI	50.645%	1.34e-100	K00548	2.1.1.13	Metabolism|Amino acid metabolism|Cysteine and methionine metabolism [PATH:ko00270]|5-methyltetrahydrofolate--homocysteine methyltransferase [EC:2.1.1.13]	Metabolism|Metabolism of other amino acids|Selenocompound metabolism [PATH:ko00450]|5-methyltetrahydrofolate--homocysteine methyltransferase [EC:2.1.1.13]	Metabolism|Metabolism of cofactors and vitamins|One carbon pool by folate [PATH:ko00670]|5-methyltetrahydrofolate--homocysteine methyltransferase [EC:2.1.1.13]
Thraus_T2839	Uncharacterized peptidase y4nA	Y4NA_SINFN	39.466%	3.57e-152	K01322	3.4.21.26	Organismal Systems|Endocrine system|Renin-angiotensin system [PATH:ko04614]|prolyl oligopeptidase [EC:3.4.21.26]	Brite Hierarchies|Protein families: metabolism|Peptidases and inhibitors [BR:ko01002]|prolyl oligopeptidase [EC:3.4.21.26]
Thraus_T2961	Oxygen-dependent choline dehydrogenase {ECO:0000255|HAMAP-Rule:MF_00750}	BETA_PHOPR	47.619%	3.02e-169	K00108	1.1.99.1	Metabolism|Amino acid metabolism|Glycine, serine and threonine metabolism [PATH:ko00260]|choline dehydrogenase [EC:1.1.99.1]
Thraus_T2832	Auxilin-related protein 2	AUXI2_ARATH	42.623%	2.98e-16	NO_KO_DATA	NO_EC_NUMBER	NO_KO_DATA
Thraus_T2833	Putative glycerophosphodiester phosphodiesterase YhdW	YHDW_BACSU	34.034%	1.91e-31	K01126	3.1.4.46	Metabolism|Lipid metabolism|Glycerophospholipid metabolism [PATH:ko00564]|glycerophosphoryl diester phosphodiesterase [EC:3.1.4.46]
Thraus_T2830	Kinesin heavy chain	KINH_NEUCR	50.266%	1.7e-101	K10396	NO_EC_NUMBER	Cellular Processes|Transport and catabolism|Endocytosis [PATH:ko04144]|kinesin family member 5	Organismal Systems|Nervous system|Dopaminergic synapse [PATH:ko04728]|kinesin family member 5	Brite Hierarchies|Protein families: genetic information processing|Membrane trafficking [BR:ko04131]|kinesin family member 5	Brite Hierarchies|Protein families: signaling and cellular processes|Cytoskeleton proteins [BR:ko04812]|kinesin family member 5	Brite Hierarchies|Protein families: signaling and cellular processes|Exosome [BR:ko04147]|kinesin family member 5
Thraus_T2837	Transmembrane protein 18	TMM18_CHICK	35.632%	7.76e-11	K22145	NO_EC_NUMBER	Brite Hierarchies|Protein families: genetic information processing|Transcription factors [BR:ko03000]|transmembrane protein 18
Thraus_T2834	Retrovirus-related Pol polyprotein from transposon TNT 1-94	POLX_TOBAC	38.129%	6.45e-14	NO_KO_DATA	NO_EC_NUMBER	NO_KO_DATA
Thraus_T2835	Calcium and calcium/calmodulin-dependent serine/threonine-protein kinase	CCAMK_LILLO	42.012%	1.3e-33	NO_KO_DATA	NO_EC_NUMBER	NO_KO_DATA
Thraus_T2502	Ankyrin-1	ANK1_HUMAN	37.097%	5.36e-24	K10380	NO_EC_NUMBER	Organismal Systems|Immune system|Toll and Imd signaling pathway [PATH:ko04624]|ankyrin	Human Diseases|Cancer: overview|Proteoglycans in cancer [PATH:ko05205]|ankyrin	Brite Hierarchies|Protein families: signaling and cellular processes|Cytoskeleton proteins [BR:ko04812]|ankyrin
Thraus_T2963	Meiosis expressed gene 1 protein homolog	MEIG1_OXYMA	44.681%	8.51e-23	NO_KO_DATA	NO_EC_NUMBER	NO_KO_DATA
Thraus_T5598	Probable protein phosphatase 2C 35	P2C35_ARATH	30.719%	1.93e-19	NO_KO_DATA	NO_EC_NUMBER	NO_KO_DATA
Thraus_T5599	Siroheme synthase {ECO:0000255|HAMAP-Rule:MF_01646}	CYSG_METCA	41.923%	6.2e-60	K02302	2.1.1.107|1.3.1.76|4.99.1.4	Metabolism|Metabolism of cofactors and vitamins|Porphyrin and chlorophyll metabolism [PATH:ko00860]|uroporphyrin-III C-methyltransferase / precorrin-2 dehydrogenase / sirohydrochlorin ferrochelatase [EC:2.1.1.107 1.3.1.76 4.99.1.4]
Thraus_T2908	Chaperone protein DnaJ {ECO:0000255|HAMAP-Rule:MF_01152}	DNAJ_MYCPN	45.333%	1.61e-10	K03686	NO_EC_NUMBER	Brite Hierarchies|Protein families: genetic information processing|Chaperones and folding catalysts [BR:ko03110]|molecular chaperone DnaJ	Brite Hierarchies|Protein families: genetic information processing|Mitochondrial biogenesis [BR:ko03029]|molecular chaperone DnaJ
Thraus_T2503	Uncharacterized WD repeat-containing protein all2124	Y2124_NOSS1	43.103%	1.72e-06	NO_KO_DATA	NO_EC_NUMBER	NO_KO_DATA
Thraus_T2906	Alanyl-tRNA editing protein Aarsd1	AASD1_MOUSE	31.294%	4.49e-41	K07050	3.1.1.-	Brite Hierarchies|Protein families: genetic information processing|Transfer RNA biogenesis [BR:ko03016]|misacylated tRNA(Ala) deacylase [EC:3.1.1.-]
Thraus_T2907	Broad substrate specificity ATP-binding cassette transporter ABCG2 {ECO:0000305}	ABCG2_BOVIN	40.708%	6.02e-54	NO_KO_DATA	NO_EC_NUMBER	NO_KO_DATA
Thraus_T2904	GDP-fucose transporter 1 {ECO:0000303|PubMed:27381418}	GFT1_ARATH	43.478%	2.03e-74	NO_KO_DATA	NO_EC_NUMBER	NO_KO_DATA
Thraus_T5225	Anaphase-promoting complex subunit 7	APC7_ARATH	30.796%	2.83e-62	K03354	NO_EC_NUMBER	Genetic Information Processing|Folding, sorting and degradation|Ubiquitin mediated proteolysis [PATH:ko04120]|anaphase-promoting complex subunit 7	Cellular Processes|Cell growth and death|Cell cycle [PATH:ko04110]|anaphase-promoting complex subunit 7	Cellular Processes|Cell growth and death|Cell cycle - yeast [PATH:ko04111]|anaphase-promoting complex subunit 7	Cellular Processes|Cell growth and death|Meiosis - yeast [PATH:ko04113]|anaphase-promoting complex subunit 7	Cellular Processes|Cell growth and death|Oocyte meiosis [PATH:ko04114]|anaphase-promoting complex subunit 7	Organismal Systems|Endocrine system|Progesterone-mediated oocyte maturation [PATH:ko04914]|anaphase-promoting complex subunit 7	Human Diseases|Infectious disease: viral|Human T-cell leukemia virus 1 infection [PATH:ko05166]|anaphase-promoting complex subunit 7	Brite Hierarchies|Protein families: genetic information processing|Ubiquitin system [BR:ko04121]|anaphase-promoting complex subunit 7	Brite Hierarchies|Protein families: genetic information processing|Chromosome and associated proteins [BR:ko03036]|anaphase-promoting complex subunit 7
Thraus_T5222	Dynein heavy chain 2, axonemal {ECO:0000305}	DYH2_HUMAN	53.254%	9.55e-175	K10408	NO_EC_NUMBER	Human Diseases|Neurodegenerative disease|Huntington disease [PATH:ko05016]|dynein heavy chain, axonemal	Brite Hierarchies|Protein families: signaling and cellular processes|Cytoskeleton proteins [BR:ko04812]|dynein heavy chain, axonemal
Thraus_T2500	Transcriptional activator Myb	MYB_XENLA	59.302%	3.68e-25	K09420	NO_EC_NUMBER	Environmental Information Processing|Signal transduction|PI3K-Akt signaling pathway [PATH:ko04151]|transcriptional activator Myb	Brite Hierarchies|Protein families: genetic information processing|Transcription factors [BR:ko03000]|transcriptional activator Myb
Thraus_T3442	Myosin-12	MYO12_ARATH	47.945%	3.04e-51	K10357	NO_EC_NUMBER	Human Diseases|Infectious disease: bacterial|Pathogenic Escherichia coli infection [PATH:ko05130]|myosin V	Brite Hierarchies|Protein families: genetic information processing|Messenger RNA biogenesis [BR:ko03019]|myosin V	Brite Hierarchies|Protein families: genetic information processing|Membrane trafficking [BR:ko04131]|myosin V	Brite Hierarchies|Protein families: genetic information processing|Mitochondrial biogenesis [BR:ko03029]|myosin V	Brite Hierarchies|Protein families: signaling and cellular processes|Cytoskeleton proteins [BR:ko04812]|myosin V
Thraus_T2901	Ras-related protein Rac1 {ECO:0000305}	RAC1_STIJA	70.33%	2.59e-44	NO_KO_DATA	NO_EC_NUMBER	NO_KO_DATA
Thraus_T1231	PITH domain-containing protein 1	PITH1_XENLA	42.246%	2.85e-43	NO_KO_DATA	NO_EC_NUMBER	NO_KO_DATA
Thraus_T1230	Polyamine aminopropyltransferase {ECO:0000255|HAMAP-Rule:MF_00198}	SPEE_AERPE	46.734%	1.63e-55	K00797	2.5.1.16	Metabolism|Amino acid metabolism|Cysteine and methionine metabolism [PATH:ko00270]|spermidine synthase [EC:2.5.1.16]	Metabolism|Amino acid metabolism|Arginine and proline metabolism [PATH:ko00330]|spermidine synthase [EC:2.5.1.16]	Metabolism|Metabolism of other amino acids|Glutathione metabolism [PATH:ko00480]|spermidine synthase [EC:2.5.1.16]
Thraus_T1232	Fumarylacetoacetase	FAAA_DICDI	56.643%	1.11e-175	K01555	3.7.1.2	Metabolism|Amino acid metabolism|Tyrosine metabolism [PATH:ko00350]|fumarylacetoacetase [EC:3.7.1.2]	Metabolism|Xenobiotics biodegradation and metabolism|Styrene degradation [PATH:ko00643]|fumarylacetoacetase [EC:3.7.1.2]	Brite Hierarchies|Protein families: signaling and cellular processes|Exosome [BR:ko04147]|fumarylacetoacetase [EC:3.7.1.2]
Thraus_T1235	Serine/threonine-protein kinase StkP	STKP_STREE	31.016%	6.8e-12	NO_KO_DATA	NO_EC_NUMBER	NO_KO_DATA
Thraus_T1234	Phosducin-like protein	PHLP_HUMAN	33.813%	2.6e-13	NO_KO_DATA	NO_EC_NUMBER	NO_KO_DATA
Thraus_T1237	Isoleucine--tRNA ligase {ECO:0000255|HAMAP-Rule:MF_02002}	SYI_CROS5	38.293%	3.78e-171	K01870	6.1.1.5	Genetic Information Processing|Translation|Aminoacyl-tRNA biosynthesis [PATH:ko00970]|isoleucyl-tRNA synthetase [EC:6.1.1.5]	Brite Hierarchies|Protein families: metabolism|Amino acid related enzymes [BR:ko01007]|isoleucyl-tRNA synthetase [EC:6.1.1.5]	Brite Hierarchies|Protein families: genetic information processing|Transfer RNA biogenesis [BR:ko03016]|isoleucyl-tRNA synthetase [EC:6.1.1.5]
Thraus_T1236	Cytochrome c peroxidase, mitochondrial	CCPR_GIBZE	56.069%	2.77e-57	K00428	1.11.1.5	Not Included in Pathway or Brite|Unclassified: metabolism|Enzymes with EC numbers|cytochrome c peroxidase [EC:1.11.1.5]
Thraus_T1239	Cystathionine gamma-synthase	METB_MYCTU	43.49%	9.79e-78	K01739	2.5.1.48	Metabolism|Energy metabolism|Sulfur metabolism [PATH:ko00920]|cystathionine gamma-synthase [EC:2.5.1.48]	Metabolism|Amino acid metabolism|Cysteine and methionine metabolism [PATH:ko00270]|cystathionine gamma-synthase [EC:2.5.1.48]	Metabolism|Metabolism of other amino acids|Selenocompound metabolism [PATH:ko00450]|cystathionine gamma-synthase [EC:2.5.1.48]
Thraus_T1238	Carabin	TB10C_MOUSE	31.061%	3.59e-06	K19944	NO_EC_NUMBER	Brite Hierarchies|Protein families: genetic information processing|Membrane trafficking [BR:ko04131]|TBC1 domain family member 10
Thraus_T2211	Dolichyl-diphosphooligosaccharide--protein glycosyltransferase subunit STT3	STT3_DICDI	34.071%	6.91e-135	K07151	2.4.99.18	Metabolism|Glycan biosynthesis and metabolism|N-Glycan biosynthesis [PATH:ko00510]|dolichyl-diphosphooligosaccharide---protein glycosyltransferase [EC:2.4.99.18]	Metabolism|Glycan biosynthesis and metabolism|Various types of N-glycan biosynthesis [PATH:ko00513]|dolichyl-diphosphooligosaccharide---protein glycosyltransferase [EC:2.4.99.18]	Genetic Information Processing|Folding, sorting and degradation|Protein processing in endoplasmic reticulum [PATH:ko04141]|dolichyl-diphosphooligosaccharide---protein glycosyltransferase [EC:2.4.99.18]	Brite Hierarchies|Protein families: metabolism|Glycosyltransferases [BR:ko01003]|dolichyl-diphosphooligosaccharide---protein glycosyltransferase [EC:2.4.99.18]
Thraus_T2507	Developmentally-regulated GTP-binding protein 2	DRG2_HUMAN	55.914%	5.78e-102	K06944	NO_EC_NUMBER	Not Included in Pathway or Brite|Poorly characterized|Function unknown|uncharacterized protein
Thraus_T4614	Polyketide synthase HetM	HETM_NOSS1	40%	2.26e-47	NO_KO_DATA	NO_EC_NUMBER	NO_KO_DATA
Thraus_T4898	60S ribosomal protein L23a	RL23A_RAT	65.079%	2.55e-52	K02893	NO_EC_NUMBER	Genetic Information Processing|Translation|Ribosome [PATH:ko03010]|large subunit ribosomal protein L23Ae	Brite Hierarchies|Protein families: genetic information processing|Ribosome [BR:ko03011]|large subunit ribosomal protein L23Ae
Thraus_T2505	Adenylosuccinate lyase	PUR8_CHICK	54.054%	1.97e-169	K01756	4.3.2.2	Metabolism|Nucleotide metabolism|Purine metabolism [PATH:ko00230]|adenylosuccinate lyase [EC:4.3.2.2]	Metabolism|Amino acid metabolism|Alanine, aspartate and glutamate metabolism [PATH:ko00250]|adenylosuccinate lyase [EC:4.3.2.2]
Thraus_T4616	cAMP-specific 3',5'-cyclic phosphodiesterase 4C	PDE4C_MOUSE	36.25%	6.4e-49	K13293	3.1.4.53	Metabolism|Nucleotide metabolism|Purine metabolism [PATH:ko00230]|cAMP-specific phosphodiesterase 4 [EC:3.1.4.53]	Environmental Information Processing|Signal transduction|cAMP signaling pathway [PATH:ko04024]|cAMP-specific phosphodiesterase 4 [EC:3.1.4.53]	Organismal Systems|Endocrine system|Parathyroid hormone synthesis, secretion and action [PATH:ko04928]|cAMP-specific phosphodiesterase 4 [EC:3.1.4.53]	Human Diseases|Substance dependence|Morphine addiction [PATH:ko05032]|cAMP-specific phosphodiesterase 4 [EC:3.1.4.53]
Thraus_T4896	Triosephosphate isomerase, chloroplastic	TPIC_FRAAN	51.373%	1.55e-81	NO_KO_DATA	NO_EC_NUMBER	NO_KO_DATA
Thraus_T4617	Tubulin beta chain	TBB_TETTH	91.163%	0	NO_KO_DATA	NO_EC_NUMBER	NO_KO_DATA
Thraus_T3443	Rho-related protein rac1B	RAC1B_DICDI	75.897%	5.41e-106	K04392	NO_EC_NUMBER	Environmental Information Processing|Signal transduction|Ras signaling pathway [PATH:ko04014]|Ras-related C3 botulinum toxin substrate 1	Environmental Information Processing|Signal transduction|Rap1 signaling pathway [PATH:ko04015]|Ras-related C3 botulinum toxin substrate 1	Environmental Information Processing|Signal transduction|MAPK signaling pathway [PATH:ko04010]|Ras-related C3 botulinum toxin substrate 1	Environmental Information Processing|Signal transduction|MAPK signaling pathway - fly [PATH:ko04013]|Ras-related C3 botulinum toxin substrate 1	Environmental Information Processing|Signal transduction|Wnt signaling pathway [PATH:ko04310]|Ras-related C3 botulinum toxin substrate 1	Environmental Information Processing|Signal transduction|VEGF signaling pathway [PATH:ko04370]|Ras-related C3 botulinum toxin substrate 1	Environmental Information Processing|Signal transduction|Sphingolipid signaling pathway [PATH:ko04071]|Ras-related C3 botulinum toxin substrate 1	Environmental Information Processing|Signal transduction|cAMP signaling pathway [PATH:ko04024]|Ras-related C3 botulinum toxin substrate 1	Environmental Information Processing|Signal transduction|PI3K-Akt signaling pathway [PATH:ko04151]|Ras-related C3 botulinum toxin substrate 1	Cellular Processes|Transport and catabolism|Phagosome [PATH:ko04145]|Ras-related C3 botulinum toxin substrate 1	Cellular Processes|Cellular community - eukaryotes|Focal adhesion [PATH:ko04510]|Ras-related C3 botulinum toxin substrate 1	Cellular Processes|Cellular community - eukaryotes|Adherens junction [PATH:ko04520]|Ras-related C3 botulinum toxin substrate 1	Cellular Processes|Cellular community - eukaryotes|Tight junction [PATH:ko04530]|Ras-related C3 botulinum toxin substrate 1	Cellular Processes|Cell motility|Regulation of actin cytoskeleton [PATH:ko04810]|Ras-related C3 botulinum toxin substrate 1	Organismal Systems|Immune system|Toll-like receptor signaling pathway [PATH:ko04620]|Ras-related C3 botulinum toxin substrate 1	Organismal Systems|Immune system|Natural killer cell mediated cytotoxicity [PATH:ko04650]|Ras-related C3 botulinum toxin substrate 1	Organismal Systems|Immune system|B cell receptor signaling pathway [PATH:ko04662]|Ras-related C3 botulinum toxin substrate 1	Organismal Systems|Immune system|Fc epsilon RI signaling pathway [PATH:ko04664]|Ras-related C3 botulinum toxin substrate 1	Organismal Systems|Immune system|Fc gamma R-mediated phagocytosis [PATH:ko04666]|Ras-related C3 botulinum toxin substrate 1	Organismal Systems|Immune system|Leukocyte transendothelial migration [PATH:ko04670]|Ras-related C3 botulinum toxin substrate 1	Organismal Systems|Immune system|Chemokine signaling pathway [PATH:ko04062]|Ras-related C3 botulinum toxin substrate 1	Organismal Systems|Digestive system|Pancreatic secretion [PATH:ko04972]|Ras-related C3 botulinum toxin substrate 1	Organismal Systems|Nervous system|Neurotrophin signaling pathway [PATH:ko04722]|Ras-related C3 botulinum toxin substrate 1	Organismal Systems|Development and regeneration|Axon guidance [PATH:ko04360]|Ras-related C3 botulinum toxin substrate 1	Organismal Systems|Development and regeneration|Axon regeneration [PATH:ko04361]|Ras-related C3 botulinum toxin substrate 1	Organismal Systems|Development and regeneration|Osteoclast differentiation [PATH:ko04380]|Ras-related C3 botulinum toxin substrate 1	Human Diseases|Cancer: overview|Pathways in cancer [PATH:ko05200]|Ras-related C3 botulinum toxin substrate 1	Human Diseases|Cancer: overview|Proteoglycans in cancer [PATH:ko05205]|Ras-related C3 botulinum toxin substrate 1	Human Diseases|Cancer: overview|Viral carcinogenesis [PATH:ko05203]|Ras-related C3 botulinum toxin substrate 1	Human Diseases|Cancer: overview|Choline metabolism in cancer [PATH:ko05231]|Ras-related C3 botulinum toxin substrate 1	Human Diseases|Cancer: specific types|Colorectal cancer [PATH:ko05210]|Ras-related C3 botulinum toxin substrate 1	Human Diseases|Cancer: specific types|Pancreatic cancer [PATH:ko05212]|Ras-related C3 botulinum toxin substrate 1	Human Diseases|Cancer: specific types|Renal cell carcinoma [PATH:ko05211]|Ras-related C3 botulinum toxin substrate 1	Human Diseases|Neurodegenerative disease|Amyotrophic lateral sclerosis (ALS) [PATH:ko05014]|Ras-related C3 botulinum toxin substrate 1	Human Diseases|Cardiovascular disease|Fluid shear stress and atherosclerosis [PATH:ko05418]|Ras-related C3 botulinum toxin substrate 1	Human Diseases|Cardiovascular disease|Viral myocarditis [PATH:ko05416]|Ras-related C3 botulinum toxin substrate 1	Human Diseases|Endocrine and metabolic disease|Non-alcoholic fatty liver disease (NAFLD) [PATH:ko04932]|Ras-related C3 botulinum toxin substrate 1	Human Diseases|Endocrine and metabolic disease|AGE-RAGE signaling pathway in diabetic complications [PATH:ko04933]|Ras-related C3 botulinum toxin substrate 1	Human Diseases|Infectious disease: bacterial|Epithelial cell signaling in Helicobacter pylori infection [PATH:ko05120]|Ras-related C3 botulinum toxin substrate 1	Human Diseases|Infectious disease: bacterial|Pathogenic Escherichia coli infection [PATH:ko05130]|Ras-related C3 botulinum toxin substrate 1	Human Diseases|Infectious disease: bacterial|Salmonella infection [PATH:ko05132]|Ras-related C3 botulinum toxin substrate 1	Human Diseases|Infectious disease: bacterial|Shigellosis [PATH:ko05131]|Ras-related C3 botulinum toxin substrate 1	Human Diseases|Infectious disease: bacterial|Yersinia infection [PATH:ko05135]|Ras-related C3 botulinum toxin substrate 1
Thraus_T4897	50S ribosomal protein L1 {ECO:0000255|HAMAP-Rule:MF_01318}	RL1_ERYLH	38.144%	1.74e-26	K02863	NO_EC_NUMBER	Genetic Information Processing|Translation|Ribosome [PATH:ko03010]|large subunit ribosomal protein L1	Brite Hierarchies|Protein families: genetic information processing|Ribosome [BR:ko03011]|large subunit ribosomal protein L1
Thraus_T4610	Histone H2B	H2B_OLILU	83.516%	1.83e-49	NO_KO_DATA	NO_EC_NUMBER	NO_KO_DATA
Thraus_T3574	Beta-arabinofuranosyltransferase RAY1 {ECO:0000305}	RAY1_ARATH	28.319%	2.25e-06	K20892	2.4.2.-	Brite Hierarchies|Protein families: metabolism|Glycosyltransferases [BR:ko01003]|beta-arabinofuranosyltransferase [EC:2.4.2.-]
Thraus_T4686	DNA replication licensing factor mcm2	MCM2_XENLA	44.253%	1.55e-42	K02540	3.6.4.12	Genetic Information Processing|Replication and repair|DNA replication [PATH:ko03030]|DNA replication licensing factor MCM2 [EC:3.6.4.12]	Cellular Processes|Cell growth and death|Cell cycle [PATH:ko04110]|DNA replication licensing factor MCM2 [EC:3.6.4.12]	Cellular Processes|Cell growth and death|Cell cycle - yeast [PATH:ko04111]|DNA replication licensing factor MCM2 [EC:3.6.4.12]	Cellular Processes|Cell growth and death|Meiosis - yeast [PATH:ko04113]|DNA replication licensing factor MCM2 [EC:3.6.4.12]	Brite Hierarchies|Protein families: genetic information processing|DNA replication proteins [BR:ko03032]|DNA replication licensing factor MCM2 [EC:3.6.4.12]	Brite Hierarchies|Protein families: genetic information processing|Chromosome and associated proteins [BR:ko03036]|DNA replication licensing factor MCM2 [EC:3.6.4.12]
Thraus_T4611	Octanoyltransferase {ECO:0000255|HAMAP-Rule:MF_00013}	LIPB_TRIV2	62.921%	1.44e-31	K03801	2.3.1.181	Metabolism|Metabolism of cofactors and vitamins|Lipoic acid metabolism [PATH:ko00785]|lipoyl(octanoyl) transferase [EC:2.3.1.181]
Thraus_T5048	NADPH-dependent alkenal/one oxidoreductase, chloroplastic {ECO:0000303|PubMed:21169366}	AOR_ARATH	34.111%	1.27e-32	K18980	1.3.1.105	Not Included in Pathway or Brite|Unclassified: metabolism|Enzymes with EC numbers|2-methylene-furan-3-one reductase [EC:1.3.1.105]
Thraus_T5049	Ceramide synthase 4 {ECO:0000250|UniProtKB:Q9HA82}	CERS4_BOVIN	27.798%	1.5e-29	K04710	2.3.1.24	Metabolism|Lipid metabolism|Sphingolipid metabolism [PATH:ko00600]|ceramide synthetase [EC:2.3.1.24]	Environmental Information Processing|Signal transduction|Sphingolipid signaling pathway [PATH:ko04071]|ceramide synthetase [EC:2.3.1.24]
Thraus_T1349	Quinone oxidoreductase 1	QOR1_ECOLI	42.193%	6.34e-65	K00344	1.6.5.5	Not Included in Pathway or Brite|Unclassified: metabolism|Enzymes with EC numbers|NADPH:quinone reductase [EC:1.6.5.5]
Thraus_T1348	Quinone oxidoreductase 1	QOR1_ECOLI	42.761%	1.07e-65	K00344	1.6.5.5	Not Included in Pathway or Brite|Unclassified: metabolism|Enzymes with EC numbers|NADPH:quinone reductase [EC:1.6.5.5]
Thraus_T4753	Adenosine 3'-phospho 5'-phosphosulfate transporter 2	S35B3_MOUSE	36.182%	2.76e-50	K15277	NO_EC_NUMBER	Brite Hierarchies|Protein families: signaling and cellular processes|Transporters [BR:ko02000]|solute carrier family 35 (adenosine 3'-phospho 5'-phosphosulfate transporter), member B3
Thraus_T1345	40S ribosomal protein S9-2	RS92_ARATH	60%	9.56e-67	K02997	NO_EC_NUMBER	Genetic Information Processing|Translation|Ribosome [PATH:ko03010]|small subunit ribosomal protein S9e	Brite Hierarchies|Protein families: genetic information processing|Ribosome [BR:ko03011]|small subunit ribosomal protein S9e
Thraus_T1344	Sphingoid long chain base kinase 5	LCB5_YEAST	29.469%	1.86e-20	K04718	2.7.1.91	Metabolism|Lipid metabolism|Sphingolipid metabolism [PATH:ko00600]|sphingosine kinase [EC:2.7.1.91]	Environmental Information Processing|Signal transduction|VEGF signaling pathway [PATH:ko04370]|sphingosine kinase [EC:2.7.1.91]	Environmental Information Processing|Signal transduction|Apelin signaling pathway [PATH:ko04371]|sphingosine kinase [EC:2.7.1.91]	Environmental Information Processing|Signal transduction|Calcium signaling pathway [PATH:ko04020]|sphingosine kinase [EC:2.7.1.91]	Environmental Information Processing|Signal transduction|Phospholipase D signaling pathway [PATH:ko04072]|sphingosine kinase [EC:2.7.1.91]	Environmental Information Processing|Signal transduction|Sphingolipid signaling pathway [PATH:ko04071]|sphingosine kinase [EC:2.7.1.91]	Organismal Systems|Immune system|Fc gamma R-mediated phagocytosis [PATH:ko04666]|sphingosine kinase [EC:2.7.1.91]	Human Diseases|Infectious disease: bacterial|Tuberculosis [PATH:ko05152]|sphingosine kinase [EC:2.7.1.91]
Thraus_T1347	Kynureninase {ECO:0000255|HAMAP-Rule:MF_03017}	KYNU_NEMVE	52.105%	8.26e-125	NO_KO_DATA	NO_EC_NUMBER	NO_KO_DATA
Thraus_T1346	Putative 60S ribosomal protein L30-1	RL301_ARATH	70.476%	9.13e-51	K02908	NO_EC_NUMBER	Genetic Information Processing|Translation|Ribosome [PATH:ko03010]|large subunit ribosomal protein L30e	Brite Hierarchies|Protein families: genetic information processing|Ribosome [BR:ko03011]|large subunit ribosomal protein L30e
Thraus_T1341	Myophilin	MYPH_ECHGR	40.952%	1.19e-14	NO_KO_DATA	NO_EC_NUMBER	NO_KO_DATA
Thraus_T1340	Probable pre-mRNA-splicing factor ATP-dependent RNA helicase DEAH3 {ECO:0000305}	PRP43_ARATH	63.682%	0	K12820	3.6.4.13	Genetic Information Processing|Transcription|Spliceosome [PATH:ko03040]|pre-mRNA-splicing factor ATP-dependent RNA helicase DHX15/PRP43 [EC:3.6.4.13]	Brite Hierarchies|Protein families: genetic information processing|Spliceosome [BR:ko03041]|pre-mRNA-splicing factor ATP-dependent RNA helicase DHX15/PRP43 [EC:3.6.4.13]	Brite Hierarchies|Protein families: genetic information processing|Ribosome biogenesis [BR:ko03009]|pre-mRNA-splicing factor ATP-dependent RNA helicase DHX15/PRP43 [EC:3.6.4.13]
Thraus_T4263	Ubiquitin	UBIQ_RABIT	60%	3.62e-14	NO_KO_DATA	NO_EC_NUMBER	NO_KO_DATA
Thraus_T1342	Succinyl-CoA--D-citramalate CoA-transferase	SCCT_CHLAA	42.52%	2.3e-100	K18313	2.8.3.20	Not Included in Pathway or Brite|Unclassified: metabolism|Enzymes with EC numbers|succinyl-CoA---D-citramalate CoA-transferase [EC:2.8.3.20]
Thraus_T4083	Protein OPAQUE1 {ECO:0000303|PubMed:22892319}	OP1_MAIZE	61.345%	2.51e-39	NO_KO_DATA	NO_EC_NUMBER	NO_KO_DATA
Thraus_T3341	Succinate--CoA ligase [GDP-forming] subunit beta, mitochondrial {ECO:0000255|HAMAP-Rule:MF_03221}	SUCB2_DICDI	53.602%	2.54e-124	K01900	6.2.1.4|6.2.1.5	Metabolism|Carbohydrate metabolism|Citrate cycle (TCA cycle) [PATH:ko00020]|succinyl-CoA synthetase beta subunit [EC:6.2.1.4 6.2.1.5]	Metabolism|Carbohydrate metabolism|Propanoate metabolism [PATH:ko00640]|succinyl-CoA synthetase beta subunit [EC:6.2.1.4 6.2.1.5]	Brite Hierarchies|Protein families: signaling and cellular processes|Exosome [BR:ko04147]|succinyl-CoA synthetase beta subunit [EC:6.2.1.4 6.2.1.5]
Thraus_T4068	Intraflagellar transport protein 56 {ECO:0000250|UniProtKB:Q8BS45}	IFT56_XENTR	64.952%	0	K19685	NO_EC_NUMBER	Brite Hierarchies|Protein families: genetic information processing|Chromosome and associated proteins [BR:ko03036]|intraflagellar transport protein 56
Thraus_T644	NADP-dependent malic enzyme, chloroplastic	MAOC_FLAPR	41.667%	1.58e-32	NO_KO_DATA	NO_EC_NUMBER	NO_KO_DATA
Thraus_T1586	Eukaryotic translation initiation factor 6 {ECO:0000255|HAMAP-Rule:MF_03132}	IF6_XENLA	73.543%	1.01e-111	K03264	NO_EC_NUMBER	Genetic Information Processing|Translation|Ribosome biogenesis in eukaryotes [PATH:ko03008]|translation initiation factor 6	Brite Hierarchies|Protein families: genetic information processing|Ribosome biogenesis [BR:ko03009]|translation initiation factor 6	Brite Hierarchies|Protein families: genetic information processing|Translation factors [BR:ko03012]|translation initiation factor 6
Thraus_T1585	THO complex subunit 6	THOC6_ARATH	31.138%	3.84e-16	K13175	NO_EC_NUMBER	Genetic Information Processing|Translation|RNA transport [PATH:ko03013]|THO complex subunit 6	Brite Hierarchies|Protein families: genetic information processing|Messenger RNA biogenesis [BR:ko03019]|THO complex subunit 6	Brite Hierarchies|Protein families: genetic information processing|Spliceosome [BR:ko03041]|THO complex subunit 6
Thraus_T1584	Probable membrane transporter protein YdhB	YDHB_BACSU	45.333%	2.73e-09	K07090	NO_EC_NUMBER	Not Included in Pathway or Brite|Poorly characterized|Function unknown|uncharacterized protein
Thraus_T1583	Lateral signaling target protein 2 homolog	LST2_CULQU	39.08%	7.43e-09	NO_KO_DATA	NO_EC_NUMBER	NO_KO_DATA
Thraus_T1582	Brix domain-containing protein C1B9.03c	YDD3_SCHPO	35.347%	6.12e-67	K14859	NO_EC_NUMBER	Brite Hierarchies|Protein families: genetic information processing|Ribosome biogenesis [BR:ko03009]|ribosome biogenesis protein SSF1/2
Thraus_T1581	Cystathionine beta-lyase, chloroplastic	METC_ARATH	47.411%	9.72e-111	K01760	4.4.1.13	Metabolism|Amino acid metabolism|Cysteine and methionine metabolism [PATH:ko00270]|cysteine-S-conjugate beta-lyase [EC:4.4.1.13]	Metabolism|Metabolism of other amino acids|Selenocompound metabolism [PATH:ko00450]|cysteine-S-conjugate beta-lyase [EC:4.4.1.13]
Thraus_T1580	Telomerase Cajal body protein 1 {ECO:0000250|UniProtKB:Q9BUR4}	TCAB1_BOVIN	38.438%	1.84e-60	K23314	NO_EC_NUMBER	Brite Hierarchies|Protein families: genetic information processing|DNA replication proteins [BR:ko03032]|telomerase Cajal body protein 1	Brite Hierarchies|Protein families: genetic information processing|DNA repair and recombination proteins [BR:ko03400]|telomerase Cajal body protein 1
Thraus_T4306	Actin-histidine N-methyltransferase {ECO:0000250|UniProtKB:Q86TU7}	SETD3_CALJA	24.904%	6.83e-11	NO_KO_DATA	NO_EC_NUMBER	NO_KO_DATA
Thraus_T3778	tRNA 2-selenouridine synthase {ECO:0000255|HAMAP-Rule:MF_01622}	SELU_HYDCU	33.143%	7.91e-44	K06917	2.9.1.-	Brite Hierarchies|Protein families: genetic information processing|Transfer RNA biogenesis [BR:ko03016]|tRNA 2-selenouridine synthase [EC:2.9.1.-]
Thraus_T4307	Protein RAE1 {ECO:0000303|PubMed:21189294}	RAE1_ARATH	42.69%	1.22e-84	K14298	NO_EC_NUMBER	Genetic Information Processing|Translation|RNA transport [PATH:ko03013]|mRNA export factor	Human Diseases|Infectious disease: viral|Influenza A [PATH:ko05164]|mRNA export factor	Brite Hierarchies|Protein families: genetic information processing|Messenger RNA biogenesis [BR:ko03019]|mRNA export factor	Brite Hierarchies|Protein families: genetic information processing|Chromosome and associated proteins [BR:ko03036]|mRNA export factor
Thraus_T3273	Methylmalonyl-CoA carboxyltransferase 12S subunit	12S_PROFR	30.223%	2.14e-53	NO_KO_DATA	NO_EC_NUMBER	NO_KO_DATA
Thraus_T3272	Dynein heavy chain 6, axonemal	DYH6_HUMAN	48.179%	0	K10408	NO_EC_NUMBER	Human Diseases|Neurodegenerative disease|Huntington disease [PATH:ko05016]|dynein heavy chain, axonemal	Brite Hierarchies|Protein families: signaling and cellular processes|Cytoskeleton proteins [BR:ko04812]|dynein heavy chain, axonemal
Thraus_T3271	Pre-mRNA splicing factor SR-like 1 {ECO:0000303|PubMed:12047626}	SRL1_ARATH	37.584%	1.32e-22	K12850	NO_EC_NUMBER	Genetic Information Processing|Transcription|Spliceosome [PATH:ko03040]|pre-mRNA-splicing factor 38B	Brite Hierarchies|Protein families: genetic information processing|Spliceosome [BR:ko03041]|pre-mRNA-splicing factor 38B
Thraus_T3270	Quinone oxidoreductase PIG3	QORX_HUMAN	35.119%	8.09e-42	K10133	1.-.-.-	Cellular Processes|Cell growth and death|p53 signaling pathway [PATH:ko04115]|tumor protein p53-inducible protein 3 [EC:1.-.-.-]
Thraus_T3277	Receptor-interacting serine/threonine-protein kinase 4	RIPK4_MOUSE	43.333%	3.94e-08	K08848	2.7.11.1	Brite Hierarchies|Protein families: metabolism|Protein kinases [BR:ko01001]|receptor-interacting serine/threonine-protein kinase 4 [EC:2.7.11.1]
Thraus_T3275	Palmitoyltransferase ZDHHC15	ZDH15_XENLA	40.426%	1.52e-14	K20028	2.3.1.225	Brite Hierarchies|Protein families: genetic information processing|Membrane trafficking [BR:ko04131]|palmitoyltransferase ZDHHC2/15/20 [EC:2.3.1.225]
Thraus_T4619	Sphingosine-1-phosphate lyase	SGPL_DICDI	46.535%	8.15e-124	K01634	4.1.2.27	Metabolism|Lipid metabolism|Sphingolipid metabolism [PATH:ko00600]|sphinganine-1-phosphate aldolase [EC:4.1.2.27]	Environmental Information Processing|Signal transduction|Sphingolipid signaling pathway [PATH:ko04071]|sphinganine-1-phosphate aldolase [EC:4.1.2.27]
Thraus_T1565	GPN-loop GTPase 2 {ECO:0000250|UniProtKB:Q9H9Y4}	GPN2_PIG	44.958%	2.34e-63	K24104	NO_EC_NUMBER
Thraus_T1564	Zinc finger protein BRUTUS-like At1g74770 {ECO:0000305}	BTSL2_ARATH	42.8%	1.53e-64	NO_KO_DATA	NO_EC_NUMBER	NO_KO_DATA
Thraus_T1567	DEAD-box ATP-dependent RNA helicase 28	RH28_ORYSJ	58.409%	1.27e-147	K13181	3.6.4.13	Brite Hierarchies|Protein families: genetic information processing|Spliceosome [BR:ko03041]|ATP-dependent RNA helicase DDX27 [EC:3.6.4.13]	Brite Hierarchies|Protein families: genetic information processing|Ribosome biogenesis [BR:ko03009]|ATP-dependent RNA helicase DDX27 [EC:3.6.4.13]
Thraus_T4086	Coiled-coil domain-containing protein 40 {ECO:0000305}	CCD40_MOUSE	30.982%	9.18e-49	NO_KO_DATA	NO_EC_NUMBER	NO_KO_DATA
Thraus_T1561	Pentafunctional AROM polypeptide {ECO:0000255|HAMAP-Rule:MF_03143}	ARO1_THACU	33.456%	8.14e-31	NO_KO_DATA	NO_EC_NUMBER	NO_KO_DATA
Thraus_T1560	Protein VAC14 homolog	VAC14_ARATH	47.531%	4.76e-79	K15305	NO_EC_NUMBER	Human Diseases|Cancer: overview|Viral carcinogenesis [PATH:ko05203]|vacuole morphology and inheritance protein 14	Human Diseases|Infectious disease: viral|Human T-cell leukemia virus 1 infection [PATH:ko05166]|vacuole morphology and inheritance protein 14
Thraus_T645	Dynein, cytoplasmic 1, intermediate chain 2a {ECO:0000312|ZFIN:ZDB-GENE-060929-1086}	DCI2A_DANRE	40.183%	2.2e-93	NO_KO_DATA	NO_EC_NUMBER	NO_KO_DATA
Thraus_T1562	Phosphatidylglycerophosphate phosphatase 1, chloroplastic/mitochondrial {ECO:0000303|PubMed:27541283, ECO:0000303|PubMed:27614107}	PGPP1_ARATH	36.09%	7.05e-14	K01094	3.1.3.27	Metabolism|Lipid metabolism|Glycerophospholipid metabolism [PATH:ko00564]|phosphatidylglycerophosphatase GEP4 [EC:3.1.3.27]
Thraus_T4302	Retinol dehydrogenase 12	RDH12_BOVIN	45.455%	1.28e-15	K11153	1.1.1.300	Metabolism|Metabolism of cofactors and vitamins|Retinol metabolism [PATH:ko00830]|retinol dehydrogenase 12 [EC:1.1.1.300]
Thraus_T5050	Delta-aminolevulinic acid dehydratase	HEM2_DICDI	40.491%	5.84e-70	K01698	4.2.1.24	Metabolism|Metabolism of cofactors and vitamins|Porphyrin and chlorophyll metabolism [PATH:ko00860]|porphobilinogen synthase [EC:4.2.1.24]	Brite Hierarchies|Protein families: signaling and cellular processes|Exosome [BR:ko04147]|porphobilinogen synthase [EC:4.2.1.24]
Thraus_T1568	CBS domain-containing protein CBSX3, mitochondrial	CBSX3_ARATH	32.857%	5.61e-10	NO_KO_DATA	NO_EC_NUMBER	NO_KO_DATA
Thraus_T4303	Centrosomal protein of 78 kDa	CEP78_MOUSE	30.233%	5.72e-15	K16765	NO_EC_NUMBER	Brite Hierarchies|Protein families: genetic information processing|Chromosome and associated proteins [BR:ko03036]|centrosomal protein CEP78
Thraus_T1169	Dipeptidyl aminopeptidase BI {ECO:0000303|PubMed:9469937, ECO:0000312|EMBL:BAA20518.1}	DAPB1_PSEMX	40.385%	1.39e-171	NO_KO_DATA	NO_EC_NUMBER	NO_KO_DATA
Thraus_T1168	Glutamate synthase [NADH], amyloplastic	GLSN_MEDSA	52.755%	0	NO_KO_DATA	NO_EC_NUMBER	NO_KO_DATA
Thraus_T1699	Syntaxin-6	STX6_PONAB	29.148%	1.74e-12	K08498	NO_EC_NUMBER	Genetic Information Processing|Folding, sorting and degradation|SNARE interactions in vesicular transport [PATH:ko04130]|syntaxin 6	Brite Hierarchies|Protein families: genetic information processing|Membrane trafficking [BR:ko04131]|syntaxin 6
Thraus_T1698	Centrosomal protein of 164 kDa	CE164_HUMAN	43.662%	6.41e-14	K16462	NO_EC_NUMBER	Brite Hierarchies|Protein families: genetic information processing|Chromosome and associated proteins [BR:ko03036]|centrosomal protein CEP164
Thraus_T1161	Zinc finger MYND domain-containing protein 10	ZMY10_DANRE	31.421%	2.35e-65	K24030	NO_EC_NUMBER
Thraus_T1160	L-rhamnose mutarotase {ECO:0000255|HAMAP-Rule:MF_01663}	RHAM_BACSK	26.437%	1.22e-06	K03534	5.1.3.32	Not Included in Pathway or Brite|Unclassified: metabolism|Enzymes with EC numbers|L-rhamnose mutarotase [EC:5.1.3.32]
Thraus_T1163	Cytosolic Fe-S cluster assembly factor NBP35 {ECO:0000255|HAMAP-Rule:MF_03038}	NBP35_ARATH	52.149%	1.73e-118	NO_KO_DATA	NO_EC_NUMBER	NO_KO_DATA
Thraus_T1162	TBC1 domain family member 22A	TB22A_HUMAN	32.143%	6.89e-13	K20360	NO_EC_NUMBER	Brite Hierarchies|Protein families: genetic information processing|Membrane trafficking [BR:ko04131]|TBC1 domain family member 2
Thraus_T1165	Zinc finger protein 593	ZN593_HUMAN	44.33%	3.15e-18	K14821	NO_EC_NUMBER	Brite Hierarchies|Protein families: genetic information processing|Ribosome biogenesis [BR:ko03009]|bud site selection protein 20
Thraus_T1164	Histone-lysine N-methyltransferase ATXR7 {ECO:0000305}	ATXR7_ARATH	55.346%	5.36e-50	NO_KO_DATA	NO_EC_NUMBER	NO_KO_DATA
Thraus_T1167	Mitochondrial import inner membrane translocase subunit Tim9	TIM9_MESCR	47.297%	1.35e-18	NO_KO_DATA	NO_EC_NUMBER	NO_KO_DATA
Thraus_T1166	Nuclear transcription factor Y subunit B-1	NFYB1_ARATH	73.864%	2.17e-41	NO_KO_DATA	NO_EC_NUMBER	NO_KO_DATA
Thraus_T29	cAMP-dependent protein kinase catalytic subunit PRKX	PRKX_HUMAN	30.909%	9.45e-45	K19584	2.7.11.11	Brite Hierarchies|Protein families: metabolism|Protein kinases [BR:ko01001]|protein kinase X [EC:2.7.11.11]
Thraus_T28	Cycloartenol-C-24-methyltransferase	SMT1_ARATH	48.026%	5.51e-92	K00559	2.1.1.41	Metabolism|Lipid metabolism|Steroid biosynthesis [PATH:ko00100]|sterol 24-C-methyltransferase [EC:2.1.1.41]
Thraus_T4756	Twinfilin	TWF_DICDI	25.672%	9.82e-24	K08870	NO_EC_NUMBER	Not Included in Pathway or Brite|Unclassified: signaling and cellular processes|Structural proteins|twinfilin
Thraus_T21	Sorcin	SORCN_SCHJA	38.554%	3.91e-33	NO_KO_DATA	NO_EC_NUMBER	NO_KO_DATA
Thraus_T23	Glycosylphosphatidylinositol anchor biosynthesis protein 11	GPI11_NEUCR	66.667%	2.81e-11	K05287	NO_EC_NUMBER	Metabolism|Glycan biosynthesis and metabolism|Glycosylphosphatidylinositol (GPI)-anchor biosynthesis [PATH:ko00563]|GPI ethanolamine phosphate transferase 2/3 subunit F
Thraus_T22	Superoxide dismutase [Mn], mitochondrial	SODM_DICDI	61.224%	2.15e-84	K04564	1.15.1.1	Environmental Information Processing|Signal transduction|MAPK signaling pathway - fly [PATH:ko04013]|superoxide dismutase, Fe-Mn family [EC:1.15.1.1]	Environmental Information Processing|Signal transduction|FoxO signaling pathway [PATH:ko04068]|superoxide dismutase, Fe-Mn family [EC:1.15.1.1]	Cellular Processes|Transport and catabolism|Peroxisome [PATH:ko04146]|superoxide dismutase, Fe-Mn family [EC:1.15.1.1]	Organismal Systems|Aging|Longevity regulating pathway [PATH:ko04211]|superoxide dismutase, Fe-Mn family [EC:1.15.1.1]	Organismal Systems|Aging|Longevity regulating pathway - worm [PATH:ko04212]|superoxide dismutase, Fe-Mn family [EC:1.15.1.1]	Organismal Systems|Aging|Longevity regulating pathway - multiple species [PATH:ko04213]|superoxide dismutase, Fe-Mn family [EC:1.15.1.1]	Human Diseases|Neurodegenerative disease|Huntington disease [PATH:ko05016]|superoxide dismutase, Fe-Mn family [EC:1.15.1.1]
Thraus_T25	SAGA-associated factor 29 homolog B {ECO:0000305}	SG29B_ARATH	33.043%	6.3e-07	K11364	NO_EC_NUMBER	Brite Hierarchies|Protein families: genetic information processing|Transcription machinery [BR:ko03021]|SAGA-associated factor 29	Brite Hierarchies|Protein families: genetic information processing|Chromosome and associated proteins [BR:ko03036]|SAGA-associated factor 29
Thraus_T24	AP-3 complex subunit sigma	AP3S_ARATH	46.203%	2.75e-43	K12399	NO_EC_NUMBER	Cellular Processes|Transport and catabolism|Lysosome [PATH:ko04142]|AP-3 complex subunit sigma	Brite Hierarchies|Protein families: genetic information processing|Membrane trafficking [BR:ko04131]|AP-3 complex subunit sigma
Thraus_T27	30S ribosomal protein S15 {ECO:0000255|HAMAP-Rule:MF_01343}	RS15_PERMH	53.425%	5.31e-22	K02956	NO_EC_NUMBER	Genetic Information Processing|Translation|Ribosome [PATH:ko03010]|small subunit ribosomal protein S15	Brite Hierarchies|Protein families: genetic information processing|Ribosome [BR:ko03011]|small subunit ribosomal protein S15
Thraus_T26	UDP-N-acetylglucosamine transporter	S35A3_CANLF	50.82%	3.4e-11	K15272	NO_EC_NUMBER	Brite Hierarchies|Protein families: signaling and cellular processes|Transporters [BR:ko02000]|solute carrier family 35 (UDP-sugar transporter), member A1/2/3
Thraus_T2018	Sodium- and chloride-dependent GABA transporter 2	S6A13_RAT	32.836%	3.7e-60	K05046	NO_EC_NUMBER	Organismal Systems|Nervous system|GABAergic synapse [PATH:ko04727]|solute carrier family 6 (neurotransmitter transporter, GABA) member 13	Organismal Systems|Nervous system|Synaptic vesicle cycle [PATH:ko04721]|solute carrier family 6 (neurotransmitter transporter, GABA) member 13	Brite Hierarchies|Protein families: signaling and cellular processes|Transporters [BR:ko02000]|solute carrier family 6 (neurotransmitter transporter, GABA) member 13
Thraus_T2019	Mitogen-activated protein kinase kinase 1a {ECO:0000303|PubMed:27268428}	M2K1A_PHYPA	38.462%	2.45e-32	NO_KO_DATA	NO_EC_NUMBER	NO_KO_DATA
Thraus_T4991	Protein dhs-3 {ECO:0000305}	DHS3_CAEEL	40.784%	2.09e-58	K15734	1.1.1.105	Metabolism|Metabolism of cofactors and vitamins|Retinol metabolism [PATH:ko00830]|all-trans-retinol dehydrogenase (NAD+) [EC:1.1.1.105]
Thraus_T3543	Asparagine--tRNA ligase {ECO:0000255|HAMAP-Rule:MF_00534}	SYN_PARUW	52.183%	2.42e-175	K01893	6.1.1.22	Genetic Information Processing|Translation|Aminoacyl-tRNA biosynthesis [PATH:ko00970]|asparaginyl-tRNA synthetase [EC:6.1.1.22]	Brite Hierarchies|Protein families: metabolism|Amino acid related enzymes [BR:ko01007]|asparaginyl-tRNA synthetase [EC:6.1.1.22]	Brite Hierarchies|Protein families: genetic information processing|Transfer RNA biogenesis [BR:ko03016]|asparaginyl-tRNA synthetase [EC:6.1.1.22]
Thraus_T2458	E3 ubiquitin-protein ligase Praja-1	PJA1_HUMAN	54.762%	7.46e-13	K10633	2.3.2.27	Brite Hierarchies|Protein families: genetic information processing|Ubiquitin system [BR:ko04121]|E3 ubiquitin-protein ligase Praja1 [EC:2.3.2.27]
Thraus_T2459	Phosphatidylinositol 4-phosphate 5-kinase 4	PI5K4_ARATH	53.846%	3.06e-07	K00889	2.7.1.68	Metabolism|Carbohydrate metabolism|Inositol phosphate metabolism [PATH:ko00562]|1-phosphatidylinositol-4-phosphate 5-kinase [EC:2.7.1.68]	Environmental Information Processing|Signal transduction|MAPK signaling pathway - yeast [PATH:ko04011]|1-phosphatidylinositol-4-phosphate 5-kinase [EC:2.7.1.68]	Environmental Information Processing|Signal transduction|Phosphatidylinositol signaling system [PATH:ko04070]|1-phosphatidylinositol-4-phosphate 5-kinase [EC:2.7.1.68]	Environmental Information Processing|Signal transduction|Phospholipase D signaling pathway [PATH:ko04072]|1-phosphatidylinositol-4-phosphate 5-kinase [EC:2.7.1.68]	Cellular Processes|Transport and catabolism|Endocytosis [PATH:ko04144]|1-phosphatidylinositol-4-phosphate 5-kinase [EC:2.7.1.68]	Cellular Processes|Transport and catabolism|Mitophagy - yeast [PATH:ko04139]|1-phosphatidylinositol-4-phosphate 5-kinase [EC:2.7.1.68]	Cellular Processes|Cell motility|Regulation of actin cytoskeleton [PATH:ko04810]|1-phosphatidylinositol-4-phosphate 5-kinase [EC:2.7.1.68]	Organismal Systems|Immune system|Fc gamma R-mediated phagocytosis [PATH:ko04666]|1-phosphatidylinositol-4-phosphate 5-kinase [EC:2.7.1.68]	Human Diseases|Cancer: overview|Choline metabolism in cancer [PATH:ko05231]|1-phosphatidylinositol-4-phosphate 5-kinase [EC:2.7.1.68]	Human Diseases|Infectious disease: bacterial|Yersinia infection [PATH:ko05135]|1-phosphatidylinositol-4-phosphate 5-kinase [EC:2.7.1.68]	Brite Hierarchies|Protein families: genetic information processing|Membrane trafficking [BR:ko04131]|1-phosphatidylinositol-4-phosphate 5-kinase [EC:2.7.1.68]
Thraus_T3183	Sperm-associated antigen 6	SPAG6_MOUSE	63.445%	0	NO_KO_DATA	NO_EC_NUMBER	NO_KO_DATA
Thraus_T3182	Protein SEC13 homolog {ECO:0000305}	SEC13_HUMAN	47.588%	3.28e-93	K14004	NO_EC_NUMBER	Genetic Information Processing|Translation|RNA transport [PATH:ko03013]|protein transport protein SEC13	Genetic Information Processing|Folding, sorting and degradation|Protein processing in endoplasmic reticulum [PATH:ko04141]|protein transport protein SEC13	Environmental Information Processing|Signal transduction|mTOR signaling pathway [PATH:ko04150]|protein transport protein SEC13	Brite Hierarchies|Protein families: genetic information processing|Messenger RNA biogenesis [BR:ko03019]|protein transport protein SEC13	Brite Hierarchies|Protein families: genetic information processing|Membrane trafficking [BR:ko04131]|protein transport protein SEC13
Thraus_T3185	Protein ABHD1 {ECO:0000305}	ABHD1_BOVIN	30.699%	2.4e-37	K13696	NO_EC_NUMBER	Not Included in Pathway or Brite|Poorly characterized|General function prediction only|abhydrolase domain-containing protein 1/3
Thraus_T3184	Eukaryotic translation initiation factor 5	IF5_HUMAN	54.861%	1.4e-40	K03262	NO_EC_NUMBER	Genetic Information Processing|Translation|RNA transport [PATH:ko03013]|translation initiation factor 5	Cellular Processes|Cell growth and death|Apoptosis - fly [PATH:ko04214]|translation initiation factor 5	Brite Hierarchies|Protein families: genetic information processing|Translation factors [BR:ko03012]|translation initiation factor 5
Thraus_T3187	2-deoxy-scyllo-inosamine dehydrogenase	DOIAD_STRRI	29.467%	4.42e-15	NO_KO_DATA	NO_EC_NUMBER	NO_KO_DATA
Thraus_T3186	Glycine--tRNA ligase {ECO:0000255|HAMAP-Rule:MF_00253}	SYG_MESFL	47.841%	8.95e-90	K01880	6.1.1.14	Genetic Information Processing|Translation|Aminoacyl-tRNA biosynthesis [PATH:ko00970]|glycyl-tRNA synthetase [EC:6.1.1.14]	Brite Hierarchies|Protein families: metabolism|Amino acid related enzymes [BR:ko01007]|glycyl-tRNA synthetase [EC:6.1.1.14]	Brite Hierarchies|Protein families: genetic information processing|Transfer RNA biogenesis [BR:ko03016]|glycyl-tRNA synthetase [EC:6.1.1.14]	Brite Hierarchies|Protein families: genetic information processing|Mitochondrial biogenesis [BR:ko03029]|glycyl-tRNA synthetase [EC:6.1.1.14]
Thraus_T3189	Kinetochore protein NDC80 homolog	NDC80_HUMAN	29.81%	1.63e-35	K11547	NO_EC_NUMBER	Brite Hierarchies|Protein families: genetic information processing|Chromosome and associated proteins [BR:ko03036]|kinetochore protein NDC80
Thraus_T3545	Choline dehydrogenase, mitochondrial	CHDH_RAT	32.338%	5.03e-72	K00108	1.1.99.1	Metabolism|Amino acid metabolism|Glycine, serine and threonine metabolism [PATH:ko00260]|choline dehydrogenase [EC:1.1.99.1]
Thraus_T2452	Endothelin-converting enzyme 2 {ECO:0000250|UniProtKB:P0DPD6}	ECE2_BOVIN	36.215%	2.66e-136	NO_KO_DATA	NO_EC_NUMBER	NO_KO_DATA
Thraus_T2453	Kinesin heavy chain	KINH_DORPE	52.252%	1.87e-26	NO_KO_DATA	NO_EC_NUMBER	NO_KO_DATA
Thraus_T2454	Aldehyde dehydrogenase, dimeric NADP-preferring	AL3A1_HUMAN	44.843%	2.58e-137	K00129	1.2.1.5	Metabolism|Carbohydrate metabolism|Glycolysis / Gluconeogenesis [PATH:ko00010]|aldehyde dehydrogenase (NAD(P)+) [EC:1.2.1.5]	Metabolism|Amino acid metabolism|Histidine metabolism [PATH:ko00340]|aldehyde dehydrogenase (NAD(P)+) [EC:1.2.1.5]	Metabolism|Amino acid metabolism|Tyrosine metabolism [PATH:ko00350]|aldehyde dehydrogenase (NAD(P)+) [EC:1.2.1.5]	Metabolism|Amino acid metabolism|Phenylalanine metabolism [PATH:ko00360]|aldehyde dehydrogenase (NAD(P)+) [EC:1.2.1.5]	Metabolism|Metabolism of other amino acids|beta-Alanine metabolism [PATH:ko00410]|aldehyde dehydrogenase (NAD(P)+) [EC:1.2.1.5]	Metabolism|Xenobiotics biodegradation and metabolism|Metabolism of xenobiotics by cytochrome P450 [PATH:ko00980]|aldehyde dehydrogenase (NAD(P)+) [EC:1.2.1.5]	Metabolism|Xenobiotics biodegradation and metabolism|Drug metabolism - cytochrome P450 [PATH:ko00982]|aldehyde dehydrogenase (NAD(P)+) [EC:1.2.1.5]	Human Diseases|Cancer: overview|Chemical carcinogenesis [PATH:ko05204]|aldehyde dehydrogenase (NAD(P)+) [EC:1.2.1.5]
Thraus_T2455	Dihydroxy-acid dehydratase {ECO:0000255|HAMAP-Rule:MF_00012}	ILVD_RHOBA	55.037%	0	K01687	4.2.1.9	Metabolism|Amino acid metabolism|Valine, leucine and isoleucine biosynthesis [PATH:ko00290]|dihydroxy-acid dehydratase [EC:4.2.1.9]	Metabolism|Metabolism of cofactors and vitamins|Pantothenate and CoA biosynthesis [PATH:ko00770]|dihydroxy-acid dehydratase [EC:4.2.1.9]
Thraus_T2456	Probable nitronate monooxygenase	NMO_STAHJ	31.667%	1.67e-33	K00459	1.13.12.16	Metabolism|Energy metabolism|Nitrogen metabolism [PATH:ko00910]|nitronate monooxygenase [EC:1.13.12.16]
Thraus_T2457	Phosphoserine phosphatase {ECO:0000303|PubMed:28189581}	PSP_BACSU	31.25%	1.42e-14	K07025	NO_EC_NUMBER	Not Included in Pathway or Brite|Poorly characterized|General function prediction only|putative hydrolase of the HAD superfamily
Thraus_T1767	Baculoviral IAP repeat-containing protein 6	BIRC6_HUMAN	46.964%	7.46e-51	K10586	2.3.2.23	Genetic Information Processing|Folding, sorting and degradation|Ubiquitin mediated proteolysis [PATH:ko04120]|baculoviral IAP repeat-containing protein 6 (apollon) [EC:2.3.2.23]	Cellular Processes|Cell growth and death|Apoptosis - fly [PATH:ko04214]|baculoviral IAP repeat-containing protein 6 (apollon) [EC:2.3.2.23]	Cellular Processes|Cell growth and death|Apoptosis - multiple species [PATH:ko04215]|baculoviral IAP repeat-containing protein 6 (apollon) [EC:2.3.2.23]	Brite Hierarchies|Protein families: metabolism|Peptidases and inhibitors [BR:ko01002]|baculoviral IAP repeat-containing protein 6 (apollon) [EC:2.3.2.23]	Brite Hierarchies|Protein families: genetic information processing|Ubiquitin system [BR:ko04121]|baculoviral IAP repeat-containing protein 6 (apollon) [EC:2.3.2.23]
Thraus_T1766	Long-chain-fatty-acid--CoA ligase	LCFB_BACSU	31.214%	2.67e-59	K01897	6.2.1.3	Metabolism|Lipid metabolism|Fatty acid biosynthesis [PATH:ko00061]|long-chain acyl-CoA synthetase [EC:6.2.1.3]	Metabolism|Lipid metabolism|Fatty acid degradation [PATH:ko00071]|long-chain acyl-CoA synthetase [EC:6.2.1.3]	Cellular Processes|Transport and catabolism|Peroxisome [PATH:ko04146]|long-chain acyl-CoA synthetase [EC:6.2.1.3]	Cellular Processes|Cell growth and death|Ferroptosis [PATH:ko04216]|long-chain acyl-CoA synthetase [EC:6.2.1.3]	Cellular Processes|Cellular community - prokaryotes|Quorum sensing [PATH:ko02024]|long-chain acyl-CoA synthetase [EC:6.2.1.3]	Organismal Systems|Endocrine system|Adipocytokine signaling pathway [PATH:ko04920]|long-chain acyl-CoA synthetase [EC:6.2.1.3]	Organismal Systems|Endocrine system|PPAR signaling pathway [PATH:ko03320]|long-chain acyl-CoA synthetase [EC:6.2.1.3]	Organismal Systems|Environmental adaptation|Thermogenesis [PATH:ko04714]|long-chain acyl-CoA synthetase [EC:6.2.1.3]	Brite Hierarchies|Protein families: metabolism|Lipid biosynthesis proteins [BR:ko01004]|long-chain acyl-CoA synthetase [EC:6.2.1.3]	Brite Hierarchies|Protein families: signaling and cellular processes|Exosome [BR:ko04147]|long-chain acyl-CoA synthetase [EC:6.2.1.3]
Thraus_T1765	Coiled-coil domain-containing protein 61	CCD61_RAT	38.889%	4.25e-09	K16755	NO_EC_NUMBER	Brite Hierarchies|Protein families: genetic information processing|Chromosome and associated proteins [BR:ko03036]|coiled-coil domain-containing protein 61
Thraus_T1764	Fatty-acid amide hydrolase 2	FAAH2_HUMAN	37.549%	8.67e-95	K19176	3.5.1.99	Not Included in Pathway or Brite|Unclassified: metabolism|Enzymes with EC numbers|fatty acid amide hydrolase 2 [EC:3.5.1.99]
Thraus_T1763	Trypsin-7	TRY7_ANOGA	44.554%	3.35e-17	K01312	3.4.21.4	Environmental Information Processing|Signaling molecules and interaction|Neuroactive ligand-receptor interaction [PATH:ko04080]|trypsin [EC:3.4.21.4]	Organismal Systems|Digestive system|Pancreatic secretion [PATH:ko04972]|trypsin [EC:3.4.21.4]	Organismal Systems|Digestive system|Protein digestion and absorption [PATH:ko04974]|trypsin [EC:3.4.21.4]	Human Diseases|Infectious disease: viral|Influenza A [PATH:ko05164]|trypsin [EC:3.4.21.4]	Brite Hierarchies|Protein families: metabolism|Peptidases and inhibitors [BR:ko01002]|trypsin [EC:3.4.21.4]	Brite Hierarchies|Protein families: signaling and cellular processes|Exosome [BR:ko04147]|trypsin [EC:3.4.21.4]
Thraus_T1762	Probable diphthine methyl ester synthase	DPH5_ARATH	57.143%	9.5e-112	K00586	2.1.1.314	Brite Hierarchies|Protein families: genetic information processing|Translation factors [BR:ko03012]|diphthine methyl ester synthase [EC:2.1.1.314]
Thraus_T1761	Kinesin-related protein 5	KIF5_DICDI	39.687%	2.14e-59	NO_KO_DATA	NO_EC_NUMBER	NO_KO_DATA
Thraus_T1760	Alkaline serine exoprotease A	PROA_VIBAL	45.329%	2.37e-47	NO_KO_DATA	NO_EC_NUMBER	NO_KO_DATA
Thraus_T5393	Dynein regulatory complex protein 11 {ECO:0000250|UniProtKB:A8IHT2}	DRC11_HUMAN	30.023%	8.22e-39	NO_KO_DATA	NO_EC_NUMBER	NO_KO_DATA
Thraus_T4319	Interleukin-1 receptor-associated kinase 4	IRAK4_BOVIN	33.125%	1.54e-17	K04733	2.7.11.1	Environmental Information Processing|Signal transduction|MAPK signaling pathway [PATH:ko04010]|interleukin-1 receptor-associated kinase 4 [EC:2.7.11.1]	Environmental Information Processing|Signal transduction|NF-kappa B signaling pathway [PATH:ko04064]|interleukin-1 receptor-associated kinase 4 [EC:2.7.11.1]	Organismal Systems|Immune system|Toll-like receptor signaling pathway [PATH:ko04620]|interleukin-1 receptor-associated kinase 4 [EC:2.7.11.1]	Organismal Systems|Immune system|Toll and Imd signaling pathway [PATH:ko04624]|interleukin-1 receptor-associated kinase 4 [EC:2.7.11.1]	Organismal Systems|Immune system|NOD-like receptor signaling pathway [PATH:ko04621]|interleukin-1 receptor-associated kinase 4 [EC:2.7.11.1]	Organismal Systems|Nervous system|Neurotrophin signaling pathway [PATH:ko04722]|interleukin-1 receptor-associated kinase 4 [EC:2.7.11.1]	Human Diseases|Infectious disease: bacterial|Pathogenic Escherichia coli infection [PATH:ko05130]|interleukin-1 receptor-associated kinase 4 [EC:2.7.11.1]	Human Diseases|Infectious disease: bacterial|Yersinia infection [PATH:ko05135]|interleukin-1 receptor-associated kinase 4 [EC:2.7.11.1]	Human Diseases|Infectious disease: bacterial|Pertussis [PATH:ko05133]|interleukin-1 receptor-associated kinase 4 [EC:2.7.11.1]	Human Diseases|Infectious disease: bacterial|Tuberculosis [PATH:ko05152]|interleukin-1 receptor-associated kinase 4 [EC:2.7.11.1]	Human Diseases|Infectious disease: viral|Human immunodeficiency virus 1 infection [PATH:ko05170]|interleukin-1 receptor-associated kinase 4 [EC:2.7.11.1]	Human Diseases|Infectious disease: viral|Measles [PATH:ko05162]|interleukin-1 receptor-associated kinase 4 [EC:2.7.11.1]	Human Diseases|Infectious disease: viral|Influenza A [PATH:ko05164]|interleukin-1 receptor-associated kinase 4 [EC:2.7.11.1]	Human Diseases|Infectious disease: viral|Hepatitis B [PATH:ko05161]|interleukin-1 receptor-associated kinase 4 [EC:2.7.11.1]	Human Diseases|Infectious disease: viral|Herpes simplex virus 1 infection [PATH:ko05168]|interleukin-1 receptor-associated kinase 4 [EC:2.7.11.1]	Human Diseases|Infectious disease: viral|Epstein-Barr virus infection [PATH:ko05169]|interleukin-1 receptor-associated kinase 4 [EC:2.7.11.1]	Human Diseases|Infectious disease: parasitic|Toxoplasmosis [PATH:ko05145]|interleukin-1 receptor-associated kinase 4 [EC:2.7.11.1]	Human Diseases|Infectious disease: parasitic|Leishmaniasis [PATH:ko05140]|interleukin-1 receptor-associated kinase 4 [EC:2.7.11.1]	Human Diseases|Infectious disease: parasitic|Chagas disease (American trypanosomiasis) [PATH:ko05142]|interleukin-1 receptor-associated kinase 4 [EC:2.7.11.1]	Brite Hierarchies|Protein families: metabolism|Protein kinases [BR:ko01001]|interleukin-1 receptor-associated kinase 4 [EC:2.7.11.1]
Thraus_T4318	Peptidyl-prolyl cis-trans isomerase B	PPIB_DICDI	67.429%	2.61e-71	K01802	5.2.1.8	Not Included in Pathway or Brite|Unclassified: metabolism|Enzymes with EC numbers|peptidylprolyl isomerase [EC:5.2.1.8]
Thraus_T1769	NADH-cytochrome b5 reductase 1	NCB5R_LODEL	29.68%	4.18e-28	K00326	1.6.2.2	Metabolism|Carbohydrate metabolism|Amino sugar and nucleotide sugar metabolism [PATH:ko00520]|cytochrome-b5 reductase [EC:1.6.2.2]
Thraus_T1768	2-isopropylmalate synthase {ECO:0000255|HAMAP-Rule:MF_01025}	LEU1_GLOC7	48.276%	4.38e-164	K01649	2.3.3.13	Metabolism|Carbohydrate metabolism|Pyruvate metabolism [PATH:ko00620]|2-isopropylmalate synthase [EC:2.3.3.13]	Metabolism|Amino acid metabolism|Valine, leucine and isoleucine biosynthesis [PATH:ko00290]|2-isopropylmalate synthase [EC:2.3.3.13]
Thraus_T3549	Succinate dehydrogenase assembly factor 2, mitochondrial {ECO:0000255|HAMAP-Rule:MF_03057}	SDHF2_DICDI	36.585%	2.91e-13	K18168	NO_EC_NUMBER	Brite Hierarchies|Protein families: genetic information processing|Mitochondrial biogenesis [BR:ko03029]|succinate dehydrogenase assembly factor 2
Thraus_T3548	Monoacylglycerol lipase {ECO:0000303|PubMed:17784850}	MGLL_MYCTU	32.982%	6.63e-47	NO_KO_DATA	NO_EC_NUMBER	NO_KO_DATA
Thraus_T3237	Unconventional myosin-Va	MYO5A_CHICK	33.493%	2.06e-114	K10357	NO_EC_NUMBER	Human Diseases|Infectious disease: bacterial|Pathogenic Escherichia coli infection [PATH:ko05130]|myosin V	Brite Hierarchies|Protein families: genetic information processing|Messenger RNA biogenesis [BR:ko03019]|myosin V	Brite Hierarchies|Protein families: genetic information processing|Membrane trafficking [BR:ko04131]|myosin V	Brite Hierarchies|Protein families: genetic information processing|Mitochondrial biogenesis [BR:ko03029]|myosin V	Brite Hierarchies|Protein families: signaling and cellular processes|Cytoskeleton proteins [BR:ko04812]|myosin V
Thraus_T4424	Protein ENHANCED DISEASE RESISTANCE 2-like	EDR2L_ARATH	29.915%	1.67e-10	NO_KO_DATA	NO_EC_NUMBER	NO_KO_DATA
Thraus_T3699	Glucosidase 2 subunit beta	GLU2B_USTMA	47.727%	5.55e-06	K08288	NO_EC_NUMBER	Genetic Information Processing|Folding, sorting and degradation|Protein processing in endoplasmic reticulum [PATH:ko04141]|protein kinase C substrate 80K-H	Brite Hierarchies|Protein families: signaling and cellular processes|Lectins [BR:ko04091]|protein kinase C substrate 80K-H
Thraus_T3698	RING-H2 finger protein ATL74	ATL74_ARATH	52.174%	4.06e-09	NO_KO_DATA	NO_EC_NUMBER	NO_KO_DATA
Thraus_T5525	Ribosome biogenesis protein BRX1 homolog	BRX1_XENLA	52.439%	2.13e-85	NO_KO_DATA	NO_EC_NUMBER	NO_KO_DATA
Thraus_T3695	Putative transposase R104	YR104_MIMIV	52.113%	2.01e-18	NO_KO_DATA	NO_EC_NUMBER	NO_KO_DATA
Thraus_T2014	Ca(2+)/H(+) antiporter	CAX_APHHA	39.011%	2.13e-64	NO_KO_DATA	NO_EC_NUMBER	NO_KO_DATA
Thraus_T3697	Uncharacterized oxidoreductase At1g06690, chloroplastic	Y1669_ARATH	32.817%	4.37e-42	NO_KO_DATA	NO_EC_NUMBER	NO_KO_DATA
Thraus_T3693	Ubiquitin hydrolase B	UBPB_DICDI	31.687%	3.14e-28	K11841	3.4.19.12	Cellular Processes|Transport and catabolism|Mitophagy - yeast [PATH:ko04139]|ubiquitin carboxyl-terminal hydrolase 10 [EC:3.4.19.12]	Brite Hierarchies|Protein families: metabolism|Peptidases and inhibitors [BR:ko01002]|ubiquitin carboxyl-terminal hydrolase 10 [EC:3.4.19.12]	Brite Hierarchies|Protein families: genetic information processing|Ubiquitin system [BR:ko04121]|ubiquitin carboxyl-terminal hydrolase 10 [EC:3.4.19.12]
Thraus_T2015	Calcium/calmodulin-dependent protein kinase type 1 {ECO:0000303|PubMed:10428833}	CMK1_CAEEL	42.629%	2.11e-69	K08794	2.7.11.17	Environmental Information Processing|Signal transduction|Calcium signaling pathway [PATH:ko04020]|calcium/calmodulin-dependent protein kinase I [EC:2.7.11.17]	Organismal Systems|Endocrine system|Oxytocin signaling pathway [PATH:ko04921]|calcium/calmodulin-dependent protein kinase I [EC:2.7.11.17]	Organismal Systems|Endocrine system|Aldosterone synthesis and secretion [PATH:ko04925]|calcium/calmodulin-dependent protein kinase I [EC:2.7.11.17]	Human Diseases|Cancer: specific types|Glioma [PATH:ko05214]|calcium/calmodulin-dependent protein kinase I [EC:2.7.11.17]	Brite Hierarchies|Protein families: metabolism|Protein kinases [BR:ko01001]|calcium/calmodulin-dependent protein kinase I [EC:2.7.11.17]
Thraus_T5627	Histone H3	H3_URECA	94.737%	1.01e-75	NO_KO_DATA	NO_EC_NUMBER	NO_KO_DATA
Thraus_T1839	Eukaryotic translation initiation factor 3 subunit L {ECO:0000255|HAMAP-Rule:MF_03011}	EIF3L_XENTR	39.256%	6.31e-121	K15029	NO_EC_NUMBER	Brite Hierarchies|Protein families: genetic information processing|Translation factors [BR:ko03012]|translation initiation factor 3 subunit L
Thraus_T1838	Metal tolerance protein 2	MTP2_ORYSJ	35.439%	2.07e-38	NO_KO_DATA	NO_EC_NUMBER	NO_KO_DATA
Thraus_T1837	JmjC domain-containing protein 4	JMJ4_SCHPO	33.333%	3.07e-25	NO_KO_DATA	NO_EC_NUMBER	NO_KO_DATA
Thraus_T1836	Ethanolamine-phosphate cytidylyltransferase	PECT1_ARATH	47.027%	1.11e-106	K00967	2.7.7.14	Metabolism|Lipid metabolism|Glycerophospholipid metabolism [PATH:ko00564]|ethanolamine-phosphate cytidylyltransferase [EC:2.7.7.14]	Metabolism|Metabolism of other amino acids|Phosphonate and phosphinate metabolism [PATH:ko00440]|ethanolamine-phosphate cytidylyltransferase [EC:2.7.7.14]
Thraus_T1835	Glutathione reductase	GSHR_PSEAE	51.667%	9.44e-98	K00383	1.8.1.7	Metabolism|Metabolism of other amino acids|Glutathione metabolism [PATH:ko00480]|glutathione reductase (NADPH) [EC:1.8.1.7]	Organismal Systems|Endocrine system|Thyroid hormone synthesis [PATH:ko04918]|glutathione reductase (NADPH) [EC:1.8.1.7]
Thraus_T1834	Actin-related protein 2	ARP2_DICDI	66.489%	1.46e-174	K17260	NO_EC_NUMBER	Cellular Processes|Transport and catabolism|Autophagy - yeast [PATH:ko04138]|actin-related protein 2	Cellular Processes|Cellular community - eukaryotes|Tight junction [PATH:ko04530]|actin-related protein 2	Human Diseases|Infectious disease: bacterial|Yersinia infection [PATH:ko05135]|actin-related protein 2	Brite Hierarchies|Protein families: genetic information processing|Membrane trafficking [BR:ko04131]|actin-related protein 2	Brite Hierarchies|Protein families: signaling and cellular processes|Cytoskeleton proteins [BR:ko04812]|actin-related protein 2	Brite Hierarchies|Protein families: signaling and cellular processes|Exosome [BR:ko04147]|actin-related protein 2
Thraus_T1833	Uncharacterized protein C6G9.01c	YDH1_SCHPO	57.143%	3.12e-06	NO_KO_DATA	NO_EC_NUMBER	NO_KO_DATA
Thraus_T1832	COX assembly mitochondrial protein 2 homolog	COXM2_DANRE	34.247%	3.86e-07	K18172	NO_EC_NUMBER	Brite Hierarchies|Protein families: genetic information processing|Mitochondrial biogenesis [BR:ko03029]|COX assembly mitochondrial protein 2
Thraus_T1831	Putative peptidyl-prolyl cis-trans isomerase dodo	DOD_DROME	38.788%	1.07e-32	K09578	5.2.1.8	Organismal Systems|Immune system|RIG-I-like receptor signaling pathway [PATH:ko04622]|peptidyl-prolyl cis-trans isomerase NIMA-interacting 1 [EC:5.2.1.8]	Brite Hierarchies|Protein families: genetic information processing|Transcription machinery [BR:ko03021]|peptidyl-prolyl cis-trans isomerase NIMA-interacting 1 [EC:5.2.1.8]	Brite Hierarchies|Protein families: genetic information processing|Chaperones and folding catalysts [BR:ko03110]|peptidyl-prolyl cis-trans isomerase NIMA-interacting 1 [EC:5.2.1.8]
Thraus_T1830	Chromodomain-helicase-DNA-binding protein 7	CHD7_MOUSE	47.662%	4.06e-143	K14437	3.6.4.12	Brite Hierarchies|Protein families: genetic information processing|Chromosome and associated proteins [BR:ko03036]|chromodomain-helicase-DNA-binding protein 7 [EC:3.6.4.12]
Thraus_T4996	GPI ethanolamine phosphate transferase 2	PIGG_HUMAN	44.03%	2.18e-58	K05310	2.7.-.-	Metabolism|Glycan biosynthesis and metabolism|Glycosylphosphatidylinositol (GPI)-anchor biosynthesis [PATH:ko00563]|ethanolamine phosphate transferase 2 subunit G [EC:2.7.-.-]
Thraus_T4833	Alkaline phosphatase D	PPBD_BACSU	29.765%	6.35e-27	K01113	3.1.3.1	Metabolism|Metabolism of cofactors and vitamins|Folate biosynthesis [PATH:ko00790]|alkaline phosphatase D [EC:3.1.3.1]	Environmental Information Processing|Signal transduction|Two-component system [PATH:ko02020]|alkaline phosphatase D [EC:3.1.3.1]
Thraus_T5634	Protein SHQ1 homolog	SHQ1_HUMAN	27.479%	3.08e-49	K14764	NO_EC_NUMBER	Brite Hierarchies|Protein families: genetic information processing|Ribosome biogenesis [BR:ko03009]|protein SHQ1
Thraus_T5584	Calcium-dependent protein kinase 10	CDPKA_ARATH	28.972%	8.03e-08	K13412	2.7.11.1	Organismal Systems|Environmental adaptation|Plant-pathogen interaction [PATH:ko04626]|calcium-dependent protein kinase [EC:2.7.11.1]	Human Diseases|Infectious disease: parasitic|Toxoplasmosis [PATH:ko05145]|calcium-dependent protein kinase [EC:2.7.11.1]	Brite Hierarchies|Protein families: metabolism|Protein kinases [BR:ko01001]|calcium-dependent protein kinase [EC:2.7.11.1]
Thraus_T4752	Probable ethanolamine kinase A	EKIA_DICDI	31.389%	2e-50	K00894	2.7.1.82	Metabolism|Lipid metabolism|Glycerophospholipid metabolism [PATH:ko00564]|ethanolamine kinase [EC:2.7.1.82]
Thraus_T3053	cAMP-dependent protein kinase regulatory subunit	KAPR_YARLI	34.272%	1.04e-25	K04739	NO_EC_NUMBER	Organismal Systems|Endocrine system|Insulin signaling pathway [PATH:ko04910]|cAMP-dependent protein kinase regulator
Thraus_T3052	Tenascin	TENA_MOUSE	40.404%	3.41e-09	K06252	NO_EC_NUMBER	Environmental Information Processing|Signal transduction|PI3K-Akt signaling pathway [PATH:ko04151]|tenascin	Environmental Information Processing|Signaling molecules and interaction|ECM-receptor interaction [PATH:ko04512]|tenascin	Cellular Processes|Cellular community - eukaryotes|Focal adhesion [PATH:ko04510]|tenascin	Human Diseases|Cancer: overview|MicroRNAs in cancer [PATH:ko05206]|tenascin	Human Diseases|Infectious disease: viral|Human papillomavirus infection [PATH:ko05165]|tenascin	Brite Hierarchies|Protein families: signaling and cellular processes|Glycosaminoglycan binding proteins [BR:ko00536]|tenascin
Thraus_T3051	60S ribosomal protein L31	RL31_CYAPA	69.231%	3.94e-17	NO_KO_DATA	NO_EC_NUMBER	NO_KO_DATA
Thraus_T2589	DNA mismatch repair protein MutS {ECO:0000255|HAMAP-Rule:MF_00096}	MUTS_ALCBS	51.497%	3.87e-41	K03555	NO_EC_NUMBER	Genetic Information Processing|Replication and repair|Mismatch repair [PATH:ko03430]|DNA mismatch repair protein MutS	Brite Hierarchies|Protein families: genetic information processing|DNA repair and recombination proteins [BR:ko03400]|DNA mismatch repair protein MutS
Thraus_T3057	Cilia- and flagella-associated protein 73 {ECO:0000305}	CFA73_CHLRE	50%	6.21e-56	NO_KO_DATA	NO_EC_NUMBER	NO_KO_DATA
Thraus_T3056	UDP-GlcNAc:betaGal beta-1,3-N-acetylglucosaminyltransferase-like protein 1	B3GNL_MOUSE	37.96%	8.79e-70	NO_KO_DATA	NO_EC_NUMBER	NO_KO_DATA
Thraus_T3055	Probable serine/threonine-protein kinase vps15	VPS15_DICDI	30.573%	2.29e-16	K08333	2.7.11.1	Environmental Information Processing|Signal transduction|Apelin signaling pathway [PATH:ko04371]|phosphoinositide-3-kinase, regulatory subunit 4 [EC:2.7.11.1]	Cellular Processes|Transport and catabolism|Autophagy - animal [PATH:ko04140]|phosphoinositide-3-kinase, regulatory subunit 4 [EC:2.7.11.1]	Cellular Processes|Transport and catabolism|Autophagy - yeast [PATH:ko04138]|phosphoinositide-3-kinase, regulatory subunit 4 [EC:2.7.11.1]	Cellular Processes|Transport and catabolism|Autophagy - other [PATH:ko04136]|phosphoinositide-3-kinase, regulatory subunit 4 [EC:2.7.11.1]	Human Diseases|Infectious disease: bacterial|Shigellosis [PATH:ko05131]|phosphoinositide-3-kinase, regulatory subunit 4 [EC:2.7.11.1]	Brite Hierarchies|Protein families: metabolism|Protein kinases [BR:ko01001]|phosphoinositide-3-kinase, regulatory subunit 4 [EC:2.7.11.1]	Brite Hierarchies|Protein families: genetic information processing|Membrane trafficking [BR:ko04131]|phosphoinositide-3-kinase, regulatory subunit 4 [EC:2.7.11.1]
Thraus_T3054	Plant UBX domain-containing protein 10 {ECO:0000303|Ref.4}	PUX10_ARATH	29.967%	2.85e-25	K18726	NO_EC_NUMBER	Brite Hierarchies|Protein families: genetic information processing|Messenger RNA biogenesis [BR:ko03019]|FAS-associated factor 2
Thraus_T2895	Putative band 7 family protein R614	YR614_MIMIV	24.074%	4.78e-07	NO_KO_DATA	NO_EC_NUMBER	NO_KO_DATA
Thraus_T2580	Probable RNA-binding protein 19	RBM19_HUMAN	38.198%	4.86e-106	K14787	NO_EC_NUMBER	Brite Hierarchies|Protein families: genetic information processing|Ribosome biogenesis [BR:ko03009]|multiple RNA-binding domain-containing protein 1
Thraus_T2581	DNA-directed RNA polymerase 1B, mitochondrial	RPO1B_TOBAC	43.806%	8.79e-143	K10908	2.7.7.6	Brite Hierarchies|Protein families: genetic information processing|Mitochondrial biogenesis [BR:ko03029]|DNA-directed RNA polymerase, mitochondrial [EC:2.7.7.6]
Thraus_T2586	DExH-box ATP-dependent RNA helicase DExH1 {ECO:0000305}	DEXH1_ARATH	38.686%	7.73e-18	K14442	3.6.4.13	Genetic Information Processing|Folding, sorting and degradation|RNA degradation [PATH:ko03018]|ATP-dependent RNA helicase DHX36 [EC:3.6.4.13]	Brite Hierarchies|Protein families: genetic information processing|Messenger RNA biogenesis [BR:ko03019]|ATP-dependent RNA helicase DHX36 [EC:3.6.4.13]
Thraus_T2587	DExH-box ATP-dependent RNA helicase DExH2 {ECO:0000305}	NIH_ARATH	38.596%	6.59e-06	K14442	3.6.4.13	Genetic Information Processing|Folding, sorting and degradation|RNA degradation [PATH:ko03018]|ATP-dependent RNA helicase DHX36 [EC:3.6.4.13]	Brite Hierarchies|Protein families: genetic information processing|Messenger RNA biogenesis [BR:ko03019]|ATP-dependent RNA helicase DHX36 [EC:3.6.4.13]
Thraus_T2584	Copia protein	COPIA_DROME	37.5%	1.4e-13	NO_KO_DATA	NO_EC_NUMBER	NO_KO_DATA
Thraus_T2585	Stage V sporulation protein K	SP5K_BACSU	39.837%	6.57e-24	K06413	NO_EC_NUMBER	Not Included in Pathway or Brite|Unclassified: signaling and cellular processes|Cell growth|stage V sporulation protein K
Thraus_T2630	Cytochrome b5	CYB5_DROME	40.541%	2.29e-17	K23490	NO_EC_NUMBER	Not Included in Pathway or Brite|Unclassified: metabolism|Energy metabolism|cytochrome b5
Thraus_T2631	DNA repair protein UVH3	UVH3_ARATH	59.74%	2.39e-22	NO_KO_DATA	NO_EC_NUMBER	NO_KO_DATA
Thraus_T1909	Cys-loop ligand-gated ion channel	ELIC_DICCH	23.316%	5.83e-08	NO_KO_DATA	NO_EC_NUMBER	NO_KO_DATA
Thraus_T2633	GTPase Obg {ECO:0000255|HAMAP-Rule:MF_01454}	OBG_BORPD	42.373%	5e-48	K03979	3.6.5.-	Brite Hierarchies|Protein families: genetic information processing|Ribosome biogenesis [BR:ko03009]|GTPase [EC:3.6.5.-]
Thraus_T2637	Trafficking protein particle complex subunit 4	TPPC4_DICDI	53.731%	3.5e-45	K20303	NO_EC_NUMBER	Brite Hierarchies|Protein families: genetic information processing|Membrane trafficking [BR:ko04131]|trafficking protein particle complex subunit 4
Thraus_T383	Probable nitrile hydratase	NHAAB_MONBE	36.91%	2.12e-68	K01721	4.2.1.84	Metabolism|Amino acid metabolism|Tryptophan metabolism [PATH:ko00380]|nitrile hydratase subunit alpha [EC:4.2.1.84]	Metabolism|Xenobiotics biodegradation and metabolism|Aminobenzoate degradation [PATH:ko00627]|nitrile hydratase subunit alpha [EC:4.2.1.84]	Metabolism|Xenobiotics biodegradation and metabolism|Fluorobenzoate degradation [PATH:ko00364]|nitrile hydratase subunit alpha [EC:4.2.1.84]	Metabolism|Xenobiotics biodegradation and metabolism|Styrene degradation [PATH:ko00643]|nitrile hydratase subunit alpha [EC:4.2.1.84]
Thraus_T1902	Delta(3,5)-Delta(2,4)-dienoyl-CoA isomerase, peroxisomal {ECO:0000305}	DCI1_ARATH	38%	7.4e-48	K12663	5.3.3.21	Cellular Processes|Transport and catabolism|Peroxisome [PATH:ko04146]|Delta3,5-Delta2,4-dienoyl-CoA isomerase [EC:5.3.3.21]
Thraus_T1901	Mannosyl phosphorylinositol ceramide synthase SUR1	SUR1_YEAST	40%	7.37e-27	K22721	2.4.1.370	Not Included in Pathway or Brite|Unclassified: metabolism|Enzymes with EC numbers|inositol phosphorylceramide mannosyltransferase catalytic subunit [EC:2.4.1.370]
Thraus_T380	NADPH--cytochrome P450 reductase {ECO:0000255|HAMAP-Rule:MF_03212}	NCPR_CAVPO	36.968%	1.7e-90	NO_KO_DATA	NO_EC_NUMBER	NO_KO_DATA
Thraus_T387	ATP-dependent DNA helicase DDM1	DDM1_ARATH	41.701%	7.32e-119	K19001	NO_EC_NUMBER	Brite Hierarchies|Protein families: genetic information processing|Chromosome and associated proteins [BR:ko03036]|ATP-dependent DNA helicase
Thraus_T386	Epsin-1	ENT1_SCHPO	47.826%	5.94e-09	K12471	NO_EC_NUMBER	Cellular Processes|Transport and catabolism|Endocytosis [PATH:ko04144]|epsin	Brite Hierarchies|Protein families: genetic information processing|Membrane trafficking [BR:ko04131]|epsin
Thraus_T1905	Centrosomal protein of 76 kDa	CEP76_MOUSE	37.445%	5.62e-130	K16457	NO_EC_NUMBER	Brite Hierarchies|Protein families: genetic information processing|Chromosome and associated proteins [BR:ko03036]|centrosomal protein CEP76
Thraus_T384	Histone-arginine methyltransferase CARMER {ECO:0000250|UniProtKB:Q7Q2B7}	CARM1_DROPS	37.396%	1.34e-71	K05931	2.1.1.319	Human Diseases|Drug resistance: antineoplastic|Endocrine resistance [PATH:ko01522]|type I protein arginine methyltransferase [EC:2.1.1.319]	Brite Hierarchies|Protein families: genetic information processing|Chromosome and associated proteins [BR:ko03036]|type I protein arginine methyltransferase [EC:2.1.1.319]
Thraus_T655	Peptidyl-prolyl cis-trans isomerase A	PPIA_DICDI	66.667%	5.85e-51	K01802	5.2.1.8	Not Included in Pathway or Brite|Unclassified: metabolism|Enzymes with EC numbers|peptidylprolyl isomerase [EC:5.2.1.8]
Thraus_T654	Charged multivesicular body protein 2b	CHM2B_DANRE	42.675%	5.92e-29	K12192	NO_EC_NUMBER	Cellular Processes|Transport and catabolism|Endocytosis [PATH:ko04144]|charged multivesicular body protein 2B	Cellular Processes|Cell growth and death|Necroptosis [PATH:ko04217]|charged multivesicular body protein 2B	Brite Hierarchies|Protein families: genetic information processing|Membrane trafficking [BR:ko04131]|charged multivesicular body protein 2B	Brite Hierarchies|Protein families: signaling and cellular processes|Exosome [BR:ko04147]|charged multivesicular body protein 2B
Thraus_T657	40S ribosomal protein S29	RS29_PLUXY	71.154%	2.4e-22	K02980	NO_EC_NUMBER	Genetic Information Processing|Translation|Ribosome [PATH:ko03010]|small subunit ribosomal protein S29e	Brite Hierarchies|Protein families: genetic information processing|Ribosome [BR:ko03011]|small subunit ribosomal protein S29e
Thraus_T4820	Arf-GAP with GTPase, ANK repeat and PH domain-containing protein 6	AGAP6_HUMAN	49.515%	2.22e-16	K12491	NO_EC_NUMBER	Cellular Processes|Transport and catabolism|Endocytosis [PATH:ko04144]|Arf-GAP with GTPase, ANK repeat and PH domain-containing protein 1/3/4/5/6/9/11	Brite Hierarchies|Protein families: genetic information processing|Membrane trafficking [BR:ko04131]|Arf-GAP with GTPase, ANK repeat and PH domain-containing protein 1/3/4/5/6/9/11
Thraus_T651	Peptidyl-prolyl cis-trans isomerase CYP57	CPY57_ARATH	56.452%	1.6e-51	K12737	5.2.1.8	Brite Hierarchies|Protein families: genetic information processing|Spliceosome [BR:ko03041]|peptidyl-prolyl cis-trans isomerase SDCCAG10 [EC:5.2.1.8]	Brite Hierarchies|Protein families: genetic information processing|Chaperones and folding catalysts [BR:ko03110]|peptidyl-prolyl cis-trans isomerase SDCCAG10 [EC:5.2.1.8]
Thraus_T650	Lipoamide acyltransferase component of branched-chain alpha-keto acid dehydrogenase complex, mitochondrial	ODB2_CAEEL	44.196%	4.97e-123	K09699	2.3.1.168	Metabolism|Carbohydrate metabolism|Propanoate metabolism [PATH:ko00640]|2-oxoisovalerate dehydrogenase E2 component (dihydrolipoyl transacylase) [EC:2.3.1.168]	Metabolism|Amino acid metabolism|Valine, leucine and isoleucine degradation [PATH:ko00280]|2-oxoisovalerate dehydrogenase E2 component (dihydrolipoyl transacylase) [EC:2.3.1.168]
Thraus_T653	Mitochondrial dicarboxylate/tricarboxylate transporter DTC	DTC_ARATH	45.349%	4.63e-48	K15104	NO_EC_NUMBER	Brite Hierarchies|Protein families: signaling and cellular processes|Transporters [BR:ko02000]|solute carrier family 25 (mitochondrial oxoglutarate transporter), member 11
Thraus_T4421	Myotubularin	MTM1_XENLA	42.049%	1.14e-98	K01108	3.1.3.64|3.1.3.95	Metabolism|Carbohydrate metabolism|Inositol phosphate metabolism [PATH:ko00562]|myotubularin [EC:3.1.3.64 3.1.3.95]	Environmental Information Processing|Signal transduction|Phosphatidylinositol signaling system [PATH:ko04070]|myotubularin [EC:3.1.3.64 3.1.3.95]	Brite Hierarchies|Protein families: metabolism|Protein phosphatases and associated proteins [BR:ko01009]|myotubularin [EC:3.1.3.64 3.1.3.95]
Thraus_T5232	Histone H3	H3_URECA	88.971%	5.13e-82	NO_KO_DATA	NO_EC_NUMBER	NO_KO_DATA
Thraus_T4994	Sodium/calcium exchanger NCL1 {ECO:0000305}	NCL1_ORYSJ	38.854%	5.96e-24	NO_KO_DATA	NO_EC_NUMBER	NO_KO_DATA
Thraus_T3180	Guanine deaminase	GUAD_DICDI	38.968%	1.1e-84	K01487	3.5.4.3	Metabolism|Nucleotide metabolism|Purine metabolism [PATH:ko00230]|guanine deaminase [EC:3.5.4.3]
Thraus_T258	Ankyrin repeat domain-containing protein 29	ANR29_DANRE	36.025%	2.04e-17	NO_KO_DATA	NO_EC_NUMBER	NO_KO_DATA
Thraus_T5547	WD repeat-containing protein 19 {ECO:0000305}	WDR19_MOUSE	39.494%	0	K19671	NO_EC_NUMBER	Brite Hierarchies|Protein families: genetic information processing|Chromosome and associated proteins [BR:ko03036]|WD repeat-containing protein 19
Thraus_T4825	50S ribosomal protein L22 {ECO:0000255|HAMAP-Rule:MF_01331}	RL22_METSB	44.444%	1.31e-19	K02890	NO_EC_NUMBER	Genetic Information Processing|Translation|Ribosome [PATH:ko03010]|large subunit ribosomal protein L22	Brite Hierarchies|Protein families: genetic information processing|Ribosome [BR:ko03011]|large subunit ribosomal protein L22
Thraus_T251	Baeyer-Villiger monooxygenase {ECO:0000303|PubMed:18051317}	BVMO_PSEAE	37.168%	2.45e-89	NO_KO_DATA	NO_EC_NUMBER	NO_KO_DATA
Thraus_T250	ADP-dependent glucokinase	ADPGK_BOVIN	35.385%	2.25e-59	K08074	2.7.1.147	Metabolism|Carbohydrate metabolism|Glycolysis / Gluconeogenesis [PATH:ko00010]|ADP-dependent glucokinase [EC:2.7.1.147]
Thraus_T253	Metal tolerance protein A1	MTPA1_ARATH	37.309%	2.42e-52	K14689	NO_EC_NUMBER	Brite Hierarchies|Protein families: signaling and cellular processes|Transporters [BR:ko02000]|solute carrier family 30 (zinc transporter), member 2
Thraus_T252	Sugar phosphate exchanger 3	SPX3_BOVIN	24.8%	3.09e-33	K03447	NO_EC_NUMBER	Brite Hierarchies|Protein families: signaling and cellular processes|Transporters [BR:ko02000]|MFS transporter, OPA family, solute carrier family 37 (glycerol-3-phosphate transporter), member 3
Thraus_T255	Uncharacterized solute carrier family 35 member C320.08	YCN8_SCHPO	33.708%	2.31e-21	K15287	NO_EC_NUMBER	Brite Hierarchies|Protein families: signaling and cellular processes|Transporters [BR:ko02000]|solute carrier family 35, member F1/2
Thraus_T254	Adenosylmethionine-8-amino-7-oxononanoate aminotransferase {ECO:0000255|HAMAP-Rule:MF_00834}	BIOA_PSEVU	53.196%	9.47e-153	NO_KO_DATA	NO_EC_NUMBER	NO_KO_DATA
Thraus_T257	CDK5 and ABL1 enzyme substrate 1	CABL1_HUMAN	35.321%	9.7e-20	NO_KO_DATA	NO_EC_NUMBER	NO_KO_DATA
Thraus_T256	Ribosome-binding ATPase YchF {ECO:0000255|HAMAP-Rule:MF_00944}	YCHF_SHIFL	44.357%	4.63e-82	K06942	NO_EC_NUMBER	Brite Hierarchies|Protein families: genetic information processing|Ribosome biogenesis [BR:ko03009]|ribosome-binding ATPase
Thraus_T3565	Carbonic anhydrase	CAH_PECCA	32.258%	8.4e-26	NO_KO_DATA	NO_EC_NUMBER	NO_KO_DATA
Thraus_T4989	12-oxophytodienoate reductase 1	OPR1_ORYSJ	36.571%	3.53e-60	K05894	1.3.1.42	Metabolism|Lipid metabolism|alpha-Linolenic acid metabolism [PATH:ko00592]|12-oxophytodienoic acid reductase [EC:1.3.1.42]
Thraus_T3362	GPI mannosyltransferase 3	PIGB_BOVIN	33.115%	3.53e-35	K05286	2.4.1.-	Metabolism|Glycan biosynthesis and metabolism|Glycosylphosphatidylinositol (GPI)-anchor biosynthesis [PATH:ko00563]|GPI mannosyltransferase 3 [EC:2.4.1.-]	Brite Hierarchies|Protein families: metabolism|Glycosyltransferases [BR:ko01003]|GPI mannosyltransferase 3 [EC:2.4.1.-]
Thraus_T4829	ABC transporter G family member 36 {ECO:0000303|PubMed:18299247}	AB36G_ARATH	39.073%	2.17e-25	NO_KO_DATA	NO_EC_NUMBER	NO_KO_DATA
Thraus_T4758	Histone chaperone ASF1	ASF1_GIBZE	64.407%	1.24e-51	K10753	NO_EC_NUMBER	Brite Hierarchies|Protein families: genetic information processing|Chromosome and associated proteins [BR:ko03036]|histone chaperone ASF1
Thraus_T3462	Dynein regulatory complex subunit 2 {ECO:0000303|PubMed:25411337}	DRC2_CHLRE	59.77%	2.21e-25	NO_KO_DATA	NO_EC_NUMBER	NO_KO_DATA
Thraus_T3463	Uncharacterized protein MTH_793	Y793_METTH	32.941%	9.02e-29	K00626	2.3.1.9	Metabolism|Carbohydrate metabolism|Pyruvate metabolism [PATH:ko00620]|acetyl-CoA C-acetyltransferase [EC:2.3.1.9]	Metabolism|Carbohydrate metabolism|Glyoxylate and dicarboxylate metabolism [PATH:ko00630]|acetyl-CoA C-acetyltransferase [EC:2.3.1.9]	Metabolism|Carbohydrate metabolism|Propanoate metabolism [PATH:ko00640]|acetyl-CoA C-acetyltransferase [EC:2.3.1.9]	Metabolism|Carbohydrate metabolism|Butanoate metabolism [PATH:ko00650]|acetyl-CoA C-acetyltransferase [EC:2.3.1.9]	Metabolism|Energy metabolism|Carbon fixation pathways in prokaryotes [PATH:ko00720]|acetyl-CoA C-acetyltransferase [EC:2.3.1.9]	Metabolism|Lipid metabolism|Fatty acid degradation [PATH:ko00071]|acetyl-CoA C-acetyltransferase [EC:2.3.1.9]	Metabolism|Lipid metabolism|Synthesis and degradation of ketone bodies [PATH:ko00072]|acetyl-CoA C-acetyltransferase [EC:2.3.1.9]	Metabolism|Amino acid metabolism|Valine, leucine and isoleucine degradation [PATH:ko00280]|acetyl-CoA C-acetyltransferase [EC:2.3.1.9]	Metabolism|Amino acid metabolism|Lysine degradation [PATH:ko00310]|acetyl-CoA C-acetyltransferase [EC:2.3.1.9]	Metabolism|Amino acid metabolism|Tryptophan metabolism [PATH:ko00380]|acetyl-CoA C-acetyltransferase [EC:2.3.1.9]	Metabolism|Metabolism of terpenoids and polyketides|Terpenoid backbone biosynthesis [PATH:ko00900]|acetyl-CoA C-acetyltransferase [EC:2.3.1.9]	Metabolism|Xenobiotics biodegradation and metabolism|Benzoate degradation [PATH:ko00362]|acetyl-CoA C-acetyltransferase [EC:2.3.1.9]	Environmental Information Processing|Signal transduction|Two-component system [PATH:ko02020]|acetyl-CoA C-acetyltransferase [EC:2.3.1.9]	Brite Hierarchies|Protein families: signaling and cellular processes|Exosome [BR:ko04147]|acetyl-CoA C-acetyltransferase [EC:2.3.1.9]
Thraus_T3460	12-oxophytodienoate reductase 1	OPR1_SOLLC	36.066%	5.53e-69	K05894	1.3.1.42	Metabolism|Lipid metabolism|alpha-Linolenic acid metabolism [PATH:ko00592]|12-oxophytodienoic acid reductase [EC:1.3.1.42]
Thraus_T3461	Pre-mRNA-splicing factor CWC2	CWC2_MAGO7	40.157%	6.94e-54	NO_KO_DATA	NO_EC_NUMBER	NO_KO_DATA
Thraus_T969	ATP synthase mitochondrial F1 complex assembly factor 1	ATPF1_XENTR	25.749%	6.37e-07	K07555	NO_EC_NUMBER	Brite Hierarchies|Protein families: genetic information processing|Mitochondrial biogenesis [BR:ko03029]|ATP synthase mitochondrial F1 complex assembly factor 1
Thraus_T3464	Homocysteine synthase {ECO:0000303|PubMed:9506902}	CYSD_EMENI	62.529%	4.84e-170	K17069	2.5.1.49|2.5.1.47	Metabolism|Energy metabolism|Sulfur metabolism [PATH:ko00920]|O-acetylhomoserine/O-acetylserine sulfhydrylase [EC:2.5.1.49 2.5.1.47]	Metabolism|Amino acid metabolism|Cysteine and methionine metabolism [PATH:ko00270]|O-acetylhomoserine/O-acetylserine sulfhydrylase [EC:2.5.1.49 2.5.1.47]
Thraus_T3465	Sodium/hydrogen exchanger 6	NHX6_ARATH	34.409%	2.27e-19	K14724	NO_EC_NUMBER	Brite Hierarchies|Protein families: signaling and cellular processes|Transporters [BR:ko02000]|solute carrier family 9 (sodium/hydrogen exchanger), member 8
Thraus_T5040	Probable beta-D-xylosidase 2	BXL2_ARATH	46.018%	0	NO_KO_DATA	NO_EC_NUMBER	NO_KO_DATA
Thraus_T3682	Protein DD3-3	DD3_DICDI	34.198%	4.18e-85	NO_KO_DATA	NO_EC_NUMBER	NO_KO_DATA
Thraus_T3469	ADP-ribosylation factor-related protein 1	ARFRP_PONAB	50.262%	7.48e-63	K07952	NO_EC_NUMBER	Brite Hierarchies|Protein families: genetic information processing|Membrane trafficking [BR:ko04131]|ADP-ribosylation factor related protein 1	Brite Hierarchies|Protein families: signaling and cellular processes|GTP-binding proteins [BR:ko04031]|ADP-ribosylation factor related protein 1
Thraus_T3713	Vacuole membrane protein 1 homolog	VMP1_DICDI	29.442%	2.28e-34	K21248	NO_EC_NUMBER	Cellular Processes|Transport and catabolism|Autophagy - animal [PATH:ko04140]|vacuole membrane protein 1
Thraus_T3564	NADH dehydrogenase (ubiquinone) complex I, assembly factor 6	NDUF6_RAT	38.908%	1.89e-55	K18163	NO_EC_NUMBER	Organismal Systems|Environmental adaptation|Thermogenesis [PATH:ko04714]|NADH dehydrogenase [ubiquinone] 1 alpha subcomplex assembly factor 6	Brite Hierarchies|Protein families: genetic information processing|Mitochondrial biogenesis [BR:ko03029]|NADH dehydrogenase [ubiquinone] 1 alpha subcomplex assembly factor 6
Thraus_T1327	12 kDa FK506-binding protein	FKB12_DROME	64.078%	1.76e-42	K09568	5.2.1.8	Brite Hierarchies|Protein families: genetic information processing|Chaperones and folding catalysts [BR:ko03110]|FK506-binding protein 1 [EC:5.2.1.8]
Thraus_T3129	Probable protein tyrosine phosphatase type IVA A	TP4AA_DICDI	51.613%	1.22e-38	K18041	3.1.3.48	Brite Hierarchies|Protein families: metabolism|Protein phosphatases and associated proteins [BR:ko01009]|protein tyrosine phosphatase type IVA [EC:3.1.3.48]
Thraus_T1326	Protein ENHANCED DISEASE RESISTANCE 2-like	EDR2L_ARATH	37.226%	2.97e-23	NO_KO_DATA	NO_EC_NUMBER	NO_KO_DATA
Thraus_T3128	Serine/threonine-protein phosphatase PP-X isozyme 1	PPX1_ARATH	56.655%	1.03e-115	K15423	3.1.3.16	Organismal Systems|Endocrine system|Glucagon signaling pathway [PATH:ko04922]|serine/threonine-protein phosphatase 4 catalytic subunit [EC:3.1.3.16]	Brite Hierarchies|Protein families: metabolism|Protein phosphatases and associated proteins [BR:ko01009]|serine/threonine-protein phosphatase 4 catalytic subunit [EC:3.1.3.16]	Brite Hierarchies|Protein families: genetic information processing|DNA repair and recombination proteins [BR:ko03400]|serine/threonine-protein phosphatase 4 catalytic subunit [EC:3.1.3.16]
Thraus_T5647	Enoyl-CoA delta isomerase 1, mitochondrial {ECO:0000305}	ECI1_MOUSE	40.972%	4.36e-29	K13238	5.3.3.8	Metabolism|Lipid metabolism|Fatty acid degradation [PATH:ko00071]|Delta3-Delta2-enoyl-CoA isomerase [EC:5.3.3.8]
Thraus_T1325	AMMECR1-like protein	AMERL_MOUSE	48.756%	3.78e-49	NO_KO_DATA	NO_EC_NUMBER	NO_KO_DATA
Thraus_T4275	Outer dynein arm protein 1	ODA1_CHLRE	35.556%	2.85e-32	K23732	NO ENTRY FOUND.
Thraus_T1324	Protein GrpE {ECO:0000255|HAMAP-Rule:MF_01151}	GRPE_OCHA4	45.161%	2.18e-39	K03687	NO_EC_NUMBER	Brite Hierarchies|Protein families: genetic information processing|Chaperones and folding catalysts [BR:ko03110]|molecular chaperone GrpE	Brite Hierarchies|Protein families: genetic information processing|Mitochondrial biogenesis [BR:ko03029]|molecular chaperone GrpE
Thraus_T4751	Folylpolyglutamate synthase, mitochondrial	FOLC_HUMAN	42.927%	4.41e-36	K01930	6.3.2.17	Metabolism|Metabolism of cofactors and vitamins|Folate biosynthesis [PATH:ko00790]|folylpolyglutamate synthase [EC:6.3.2.17]	Human Diseases|Drug resistance: antineoplastic|Antifolate resistance [PATH:ko01523]|folylpolyglutamate synthase [EC:6.3.2.17]
Thraus_T3714	Transcription factor MYB118 {ECO:0000303|PubMed:11597504}	MY118_ARATH	53.061%	3.97e-28	K09422	NO_EC_NUMBER	Brite Hierarchies|Protein families: genetic information processing|Transcription factors [BR:ko03000]|transcription factor MYB, plant
Thraus_T3231	WD repeat-containing protein 92	WDR92_MOUSE	55.587%	1.2e-134	NO_KO_DATA	NO_EC_NUMBER	NO_KO_DATA
Thraus_T4202	Probable serine/threonine-protein kinase WNK9	WNK9_ORYSJ	27.329%	1.21e-13	K08867	2.7.11.1	Brite Hierarchies|Protein families: metabolism|Protein kinases [BR:ko01001]|WNK lysine deficient protein kinase [EC:2.7.11.1]	Brite Hierarchies|Protein families: metabolism|Protein phosphatases and associated proteins [BR:ko01009]|WNK lysine deficient protein kinase [EC:2.7.11.1]
Thraus_T2128	Probable carboxylic ester hydrolase LipM {ECO:0000305}	LIPM_MYCTU	35.075%	4.9e-39	NO_KO_DATA	NO_EC_NUMBER	NO_KO_DATA
Thraus_T1321	Bardet-Biedl syndrome 5 protein homolog	BBS5_MOUSE	46.687%	9.3e-100	K16748	NO_EC_NUMBER	Brite Hierarchies|Protein families: genetic information processing|Chromosome and associated proteins [BR:ko03036]|Bardet-Biedl syndrome 5 protein
Thraus_T2124	Ras-related protein Rab-4B	RAB4B_RAT	47.674%	1.45e-45	K07880	NO_EC_NUMBER	Brite Hierarchies|Protein families: genetic information processing|Membrane trafficking [BR:ko04131]|Ras-related protein Rab-4B	Brite Hierarchies|Protein families: signaling and cellular processes|Exosome [BR:ko04147]|Ras-related protein Rab-4B	Brite Hierarchies|Protein families: signaling and cellular processes|GTP-binding proteins [BR:ko04031]|Ras-related protein Rab-4B
Thraus_T2125	Histone RNA hairpin-binding protein	SLBP_DROME	55.556%	1.32e-19	K18710	NO_EC_NUMBER	Brite Hierarchies|Protein families: genetic information processing|Messenger RNA biogenesis [BR:ko03019]|histone RNA hairpin-binding protein
Thraus_T2126	Transcription factor MYB115 {ECO:0000303|PubMed:11597504}	MY115_ARATH	55%	2.94e-26	K09422	NO_EC_NUMBER	Brite Hierarchies|Protein families: genetic information processing|Transcription factors [BR:ko03000]|transcription factor MYB, plant
Thraus_T1320	Medium-chain specific acyl-CoA dehydrogenase, mitochondrial	ACADM_PIG	54.145%	7.63e-133	K00249	1.3.8.7	Metabolism|Lipid metabolism|Fatty acid degradation [PATH:ko00071]|acyl-CoA dehydrogenase [EC:1.3.8.7]	Metabolism|Amino acid metabolism|Valine, leucine and isoleucine degradation [PATH:ko00280]|acyl-CoA dehydrogenase [EC:1.3.8.7]	Organismal Systems|Endocrine system|PPAR signaling pathway [PATH:ko03320]|acyl-CoA dehydrogenase [EC:1.3.8.7]
Thraus_T2120	WD repeat, SAM and U-box domain-containing protein 1	WSDU1_MOUSE	45.333%	2.04e-08	NO_KO_DATA	NO_EC_NUMBER	NO_KO_DATA
Thraus_T2121	Calcium/calmodulin-dependent protein kinase type 1 {ECO:0000305}	CAMKI_MACNP	39.394%	2.34e-62	NO_KO_DATA	NO_EC_NUMBER	NO_KO_DATA
Thraus_T2122	GPI transamidase component PIG-S homolog	PIGS_SCHPO	35.897%	5.02e-06	NO_KO_DATA	NO_EC_NUMBER	NO_KO_DATA
Thraus_T2021	2-amino-3-ketobutyrate coenzyme A ligase, mitochondrial	KBL_HUMAN	60.154%	3.34e-166	K00639	2.3.1.29	Metabolism|Amino acid metabolism|Glycine, serine and threonine metabolism [PATH:ko00260]|glycine C-acetyltransferase [EC:2.3.1.29]	Brite Hierarchies|Protein families: metabolism|Amino acid related enzymes [BR:ko01007]|glycine C-acetyltransferase [EC:2.3.1.29]
Thraus_T2020	Dual specificity protein phosphatase CDC14A	CC14A_HUMAN	49.85%	2.9e-117	K06639	3.1.3.16|3.1.3.48	Cellular Processes|Cell growth and death|Cell cycle [PATH:ko04110]|cell division cycle 14 [EC:3.1.3.16 3.1.3.48]	Cellular Processes|Cell growth and death|Cell cycle - yeast [PATH:ko04111]|cell division cycle 14 [EC:3.1.3.16 3.1.3.48]	Cellular Processes|Cell growth and death|Meiosis - yeast [PATH:ko04113]|cell division cycle 14 [EC:3.1.3.16 3.1.3.48]	Brite Hierarchies|Protein families: metabolism|Protein phosphatases and associated proteins [BR:ko01009]|cell division cycle 14 [EC:3.1.3.16 3.1.3.48]
Thraus_T2023	Geranylgeranyl pyrophosphate synthase	GGPPS_MOUSE	52%	1.57e-96	K00804	2.5.1.1|2.5.1.10|2.5.1.29	Metabolism|Metabolism of terpenoids and polyketides|Terpenoid backbone biosynthesis [PATH:ko00900]|geranylgeranyl diphosphate synthase, type III [EC:2.5.1.1 2.5.1.10 2.5.1.29]	Brite Hierarchies|Protein families: metabolism|Prenyltransferases [BR:ko01006]|geranylgeranyl diphosphate synthase, type III [EC:2.5.1.1 2.5.1.10 2.5.1.29]
Thraus_T2022	DNA repair protein RAD50	RAD50_ARATH	47.899%	7.34e-23	K10866	3.6.-.-	Genetic Information Processing|Replication and repair|Homologous recombination [PATH:ko03440]|DNA repair protein RAD50 [EC:3.6.-.-]	Genetic Information Processing|Replication and repair|Non-homologous end-joining [PATH:ko03450]|DNA repair protein RAD50 [EC:3.6.-.-]	Cellular Processes|Cell growth and death|Cellular senescence [PATH:ko04218]|DNA repair protein RAD50 [EC:3.6.-.-]	Brite Hierarchies|Protein families: genetic information processing|DNA replication proteins [BR:ko03032]|DNA repair protein RAD50 [EC:3.6.-.-]	Brite Hierarchies|Protein families: genetic information processing|DNA repair and recombination proteins [BR:ko03400]|DNA repair protein RAD50 [EC:3.6.-.-]
Thraus_T2025	Beta,beta-carotene 15,15'-dioxygenase	BCDO1_HUMAN	27.068%	7.29e-29	K00515	1.13.11.63	Metabolism|Metabolism of cofactors and vitamins|Retinol metabolism [PATH:ko00830]|beta-carotene 15,15'-dioxygenase [EC:1.13.11.63]
Thraus_T728	ATP-dependent 6-phosphofructokinase, liver type {ECO:0000255|HAMAP-Rule:MF_03184}	PFKAL_BOVIN	43.391%	0	K00850	2.7.1.11	Metabolism|Carbohydrate metabolism|Glycolysis / Gluconeogenesis [PATH:ko00010]|6-phosphofructokinase 1 [EC:2.7.1.11]	Metabolism|Carbohydrate metabolism|Pentose phosphate pathway [PATH:ko00030]|6-phosphofructokinase 1 [EC:2.7.1.11]	Metabolism|Carbohydrate metabolism|Fructose and mannose metabolism [PATH:ko00051]|6-phosphofructokinase 1 [EC:2.7.1.11]	Metabolism|Carbohydrate metabolism|Galactose metabolism [PATH:ko00052]|6-phosphofructokinase 1 [EC:2.7.1.11]	Metabolism|Energy metabolism|Methane metabolism [PATH:ko00680]|6-phosphofructokinase 1 [EC:2.7.1.11]	Genetic Information Processing|Folding, sorting and degradation|RNA degradation [PATH:ko03018]|6-phosphofructokinase 1 [EC:2.7.1.11]	Environmental Information Processing|Signal transduction|HIF-1 signaling pathway [PATH:ko04066]|6-phosphofructokinase 1 [EC:2.7.1.11]	Environmental Information Processing|Signal transduction|AMPK signaling pathway [PATH:ko04152]|6-phosphofructokinase 1 [EC:2.7.1.11]	Organismal Systems|Endocrine system|Glucagon signaling pathway [PATH:ko04922]|6-phosphofructokinase 1 [EC:2.7.1.11]	Human Diseases|Cancer: overview|Central carbon metabolism in cancer [PATH:ko05230]|6-phosphofructokinase 1 [EC:2.7.1.11]	Brite Hierarchies|Protein families: metabolism|Protein phosphatases and associated proteins [BR:ko01009]|6-phosphofructokinase 1 [EC:2.7.1.11]	Brite Hierarchies|Protein families: genetic information processing|Messenger RNA biogenesis [BR:ko03019]|6-phosphofructokinase 1 [EC:2.7.1.11]
Thraus_T2027	Deaminated glutathione amidase, chloroplastic/cytosolic {ECO:0000305}	NILP2_ARATH	48.092%	1.14e-79	K11206	3.5.1.128	Not Included in Pathway or Brite|Unclassified: metabolism|Enzymes with EC numbers|deaminated glutathione amidase [EC:3.5.1.128]
Thraus_T2026	Putative serine/threonine-protein kinase/receptor R818	YR818_MIMIV	41.245%	1.08e-58	NO_KO_DATA	NO_EC_NUMBER	NO_KO_DATA
Thraus_T725	Cyclin-dependent kinases regulatory subunit 1	CKS1_ORYSJ	75.714%	5.33e-36	K02219	NO_EC_NUMBER	Cellular Processes|Cell growth and death|Cell cycle - yeast [PATH:ko04111]|cyclin-dependent kinase regulatory subunit CKS1	Human Diseases|Cancer: overview|Pathways in cancer [PATH:ko05200]|cyclin-dependent kinase regulatory subunit CKS1	Human Diseases|Cancer: specific types|Small cell lung cancer [PATH:ko05222]|cyclin-dependent kinase regulatory subunit CKS1
Thraus_T724	UDP-3-O-acylglucosamine N-acyltransferase 2 {ECO:0000255|HAMAP-Rule:MF_00523}	LPXD2_NITWN	41.549%	4.29e-23	K02536	2.3.1.191	Metabolism|Glycan biosynthesis and metabolism|Lipopolysaccharide biosynthesis [PATH:ko00540]|UDP-3-O-[3-hydroxymyristoyl] glucosamine N-acyltransferase [EC:2.3.1.191]	Brite Hierarchies|Protein families: metabolism|Lipopolysaccharide biosynthesis proteins [BR:ko01005]|UDP-3-O-[3-hydroxymyristoyl] glucosamine N-acyltransferase [EC:2.3.1.191]
Thraus_T727	3-dehydroquinate synthase {ECO:0000255|HAMAP-Rule:MF_00110}	AROB_PELPD	47.319%	1.66e-84	K01735	4.2.3.4	Metabolism|Amino acid metabolism|Phenylalanine, tyrosine and tryptophan biosynthesis [PATH:ko00400]|3-dehydroquinate synthase [EC:4.2.3.4]
Thraus_T726	Eukaryotic translation initiation factor 3 subunit M {ECO:0000255|HAMAP-Rule:MF_03012}	EIF3M_DICDI	28.07%	9.78e-34	K15030	NO_EC_NUMBER	Brite Hierarchies|Protein families: genetic information processing|Translation factors [BR:ko03012]|translation initiation factor 3 subunit M
Thraus_T720	General transcription factor IIH subunit 2 {ECO:0000305}	TF2H2_ARATH	36.058%	5.73e-81	K03142	NO_EC_NUMBER	Genetic Information Processing|Transcription|Basal transcription factors [PATH:ko03022]|transcription initiation factor TFIIH subunit 2	Genetic Information Processing|Replication and repair|Nucleotide excision repair [PATH:ko03420]|transcription initiation factor TFIIH subunit 2	Human Diseases|Cancer: overview|Viral carcinogenesis [PATH:ko05203]|transcription initiation factor TFIIH subunit 2	Brite Hierarchies|Protein families: genetic information processing|Transcription machinery [BR:ko03021]|transcription initiation factor TFIIH subunit 2	Brite Hierarchies|Protein families: genetic information processing|DNA repair and recombination proteins [BR:ko03400]|transcription initiation factor TFIIH subunit 2
Thraus_T723	Protein transport protein SFT2	SFT2_YEAST	30.57%	5.17e-11	NO_KO_DATA	NO_EC_NUMBER	NO_KO_DATA
Thraus_T722	Omega-amidase NIT2	NIT2_XENTR	60.448%	1.74e-117	K13566	3.5.1.3	Metabolism|Amino acid metabolism|Alanine, aspartate and glutamate metabolism [PATH:ko00250]|omega-amidase [EC:3.5.1.3]
Thraus_T3998	Ras-related protein Rap-1	RAP1_CAEEL	36.813%	1.86e-34	K04353	NO_EC_NUMBER	Environmental Information Processing|Signal transduction|Ras signaling pathway [PATH:ko04014]|Ras-related protein Rap-1A	Environmental Information Processing|Signal transduction|Rap1 signaling pathway [PATH:ko04015]|Ras-related protein Rap-1A	Environmental Information Processing|Signal transduction|MAPK signaling pathway [PATH:ko04010]|Ras-related protein Rap-1A	Environmental Information Processing|Signal transduction|cAMP signaling pathway [PATH:ko04024]|Ras-related protein Rap-1A	Cellular Processes|Cellular community - eukaryotes|Focal adhesion [PATH:ko04510]|Ras-related protein Rap-1A	Cellular Processes|Cellular community - eukaryotes|Tight junction [PATH:ko04530]|Ras-related protein Rap-1A	Organismal Systems|Immune system|Platelet activation [PATH:ko04611]|Ras-related protein Rap-1A	Organismal Systems|Immune system|Leukocyte transendothelial migration [PATH:ko04670]|Ras-related protein Rap-1A	Organismal Systems|Immune system|Chemokine signaling pathway [PATH:ko04062]|Ras-related protein Rap-1A	Organismal Systems|Digestive system|Pancreatic secretion [PATH:ko04972]|Ras-related protein Rap-1A	Organismal Systems|Nervous system|Long-term potentiation [PATH:ko04720]|Ras-related protein Rap-1A	Organismal Systems|Nervous system|Neurotrophin signaling pathway [PATH:ko04722]|Ras-related protein Rap-1A	Human Diseases|Cancer: specific types|Renal cell carcinoma [PATH:ko05211]|Ras-related protein Rap-1A	Human Diseases|Endocrine and metabolic disease|Cushing syndrome [PATH:ko04934]|Ras-related protein Rap-1A	Brite Hierarchies|Protein families: signaling and cellular processes|GTP-binding proteins [BR:ko04031]|Ras-related protein Rap-1A
Thraus_T3999	Myosin light chain kinase A	MYLKA_DICDI	35.172%	1.26e-42	K08794	2.7.11.17	Environmental Information Processing|Signal transduction|Calcium signaling pathway [PATH:ko04020]|calcium/calmodulin-dependent protein kinase I [EC:2.7.11.17]	Organismal Systems|Endocrine system|Oxytocin signaling pathway [PATH:ko04921]|calcium/calmodulin-dependent protein kinase I [EC:2.7.11.17]	Organismal Systems|Endocrine system|Aldosterone synthesis and secretion [PATH:ko04925]|calcium/calmodulin-dependent protein kinase I [EC:2.7.11.17]	Human Diseases|Cancer: specific types|Glioma [PATH:ko05214]|calcium/calmodulin-dependent protein kinase I [EC:2.7.11.17]	Brite Hierarchies|Protein families: metabolism|Protein kinases [BR:ko01001]|calcium/calmodulin-dependent protein kinase I [EC:2.7.11.17]
Thraus_T3992	Histone H2B	H2B_OLILU	82.5%	2.36e-44	NO_KO_DATA	NO_EC_NUMBER	NO_KO_DATA
Thraus_T3993	Putative 6-carboxy-5,6,7,8-tetrahydropterin synthase	QUED_METTH	27.848%	1.92e-14	K01737	4.2.3.12|4.1.2.50	Metabolism|Metabolism of cofactors and vitamins|Folate biosynthesis [PATH:ko00790]|6-pyruvoyltetrahydropterin/6-carboxytetrahydropterin synthase [EC:4.2.3.12 4.1.2.50]	Brite Hierarchies|Protein families: genetic information processing|Transfer RNA biogenesis [BR:ko03016]|6-pyruvoyltetrahydropterin/6-carboxytetrahydropterin synthase [EC:4.2.3.12 4.1.2.50]
Thraus_T3990	Putative aldehyde dehydrogenase FUS7 {ECO:0000250|UniProtKB:O34660}	FUS7_GIBM7	37.975%	1.02e-78	NO_KO_DATA	NO_EC_NUMBER	NO_KO_DATA
Thraus_T3991	Histone H2A-III	H2A3_VOLCA	75%	3.37e-52	NO_KO_DATA	NO_EC_NUMBER	NO_KO_DATA
Thraus_T3996	Chaperone protein ClpB	CLPB_RHILO	45.528%	0	K03695	NO_EC_NUMBER	Organismal Systems|Aging|Longevity regulating pathway - multiple species [PATH:ko04213]|ATP-dependent Clp protease ATP-binding subunit ClpB	Brite Hierarchies|Protein families: genetic information processing|Chaperones and folding catalysts [BR:ko03110]|ATP-dependent Clp protease ATP-binding subunit ClpB
Thraus_T3997	Elongation factor 1-alpha	EF1A_PODAS	67.299%	0	NO_KO_DATA	NO_EC_NUMBER	NO_KO_DATA
Thraus_T3804	NADH dehydrogenase [ubiquinone] 1 alpha subcomplex subunit 12	NDUAC_DICDI	41.667%	1.71e-07	K11352	NO_EC_NUMBER	Metabolism|Energy metabolism|Oxidative phosphorylation [PATH:ko00190]|NADH dehydrogenase (ubiquinone) 1 alpha subcomplex subunit 12	Organismal Systems|Nervous system|Retrograde endocannabinoid signaling [PATH:ko04723]|NADH dehydrogenase (ubiquinone) 1 alpha subcomplex subunit 12	Organismal Systems|Environmental adaptation|Thermogenesis [PATH:ko04714]|NADH dehydrogenase (ubiquinone) 1 alpha subcomplex subunit 12	Human Diseases|Neurodegenerative disease|Alzheimer disease [PATH:ko05010]|NADH dehydrogenase (ubiquinone) 1 alpha subcomplex subunit 12	Human Diseases|Neurodegenerative disease|Parkinson disease [PATH:ko05012]|NADH dehydrogenase (ubiquinone) 1 alpha subcomplex subunit 12	Human Diseases|Neurodegenerative disease|Huntington disease [PATH:ko05016]|NADH dehydrogenase (ubiquinone) 1 alpha subcomplex subunit 12	Human Diseases|Endocrine and metabolic disease|Non-alcoholic fatty liver disease (NAFLD) [PATH:ko04932]|NADH dehydrogenase (ubiquinone) 1 alpha subcomplex subunit 12
Thraus_T3787	Leucine-rich repeat-containing protein 74A {ECO:0000250|UniProtKB:Q0VAA2}	LR74A_RAT	32.09%	1.07e-06	NO_KO_DATA	NO_EC_NUMBER	NO_KO_DATA
Thraus_T3830	Phenylalanine--tRNA ligase beta subunit {ECO:0000255|HAMAP-Rule:MF_00283}	SYFB_STAES	33%	3.47e-07	K01890	6.1.1.20	Genetic Information Processing|Translation|Aminoacyl-tRNA biosynthesis [PATH:ko00970]|phenylalanyl-tRNA synthetase beta chain [EC:6.1.1.20]	Brite Hierarchies|Protein families: metabolism|Amino acid related enzymes [BR:ko01007]|phenylalanyl-tRNA synthetase beta chain [EC:6.1.1.20]	Brite Hierarchies|Protein families: genetic information processing|Transfer RNA biogenesis [BR:ko03016]|phenylalanyl-tRNA synthetase beta chain [EC:6.1.1.20]
Thraus_T3866	Serine/threonine-protein kinase StkP	STKP_STRPN	27.2%	8e-15	K12132	2.7.11.1	Brite Hierarchies|Protein families: metabolism|Protein kinases [BR:ko01001]|eukaryotic-like serine/threonine-protein kinase [EC:2.7.11.1]
Thraus_T3867	NLR family CARD domain-containing protein 3	NLRC3_HUMAN	48.864%	2.07e-17	K22614	NO_EC_NUMBER	Brite Hierarchies|Protein families: signaling and cellular processes|Pattern recognition receptors [BR:ko04054]|NLR family CARD domain-containing protein 3
Thraus_T3864	Cation-transporting ATPase HMA5 {ECO:0000305}	HMA9_ORYSJ	46.096%	1.92e-159	K17686	7.2.2.8	Environmental Information Processing|Signal transduction|MAPK signaling pathway - plant [PATH:ko04016]|P-type Cu+ transporter [EC:7.2.2.8]	Human Diseases|Drug resistance: antineoplastic|Platinum drug resistance [PATH:ko01524]|P-type Cu+ transporter [EC:7.2.2.8]
Thraus_T3865	ABC transporter C family member 5	ABCC5_DICDI	45.098%	1.38e-08	NO_KO_DATA	NO_EC_NUMBER	NO_KO_DATA
Thraus_T3862	Calcium and calcium/calmodulin-dependent serine/threonine-protein kinase	CCAMK_ORYSJ	35.266%	7.83e-66	NO_KO_DATA	NO_EC_NUMBER	NO_KO_DATA
Thraus_T3833	Phosphoglycerate kinase 1	PGK1_BOVIN	66.244%	1.76e-171	K00927	2.7.2.3	Metabolism|Carbohydrate metabolism|Glycolysis / Gluconeogenesis [PATH:ko00010]|phosphoglycerate kinase [EC:2.7.2.3]	Metabolism|Energy metabolism|Carbon fixation in photosynthetic organisms [PATH:ko00710]|phosphoglycerate kinase [EC:2.7.2.3]	Environmental Information Processing|Signal transduction|HIF-1 signaling pathway [PATH:ko04066]|phosphoglycerate kinase [EC:2.7.2.3]	Brite Hierarchies|Protein families: signaling and cellular processes|Exosome [BR:ko04147]|phosphoglycerate kinase [EC:2.7.2.3]
Thraus_T1825	Ceramide synthase 5 {ECO:0000305}	CERS5_MOUSE	36.667%	1.98e-14	K23727	2.3.1.291	Metabolism|Lipid metabolism|Sphingolipid metabolism [PATH:ko00600]|sphingoid base N-palmitoyltransferase [EC:2.3.1.291]	Environmental Information Processing|Signal transduction|Sphingolipid signaling pathway [PATH:ko04071]|sphingoid base N-palmitoyltransferase [EC:2.3.1.291]
Thraus_T3374	Alpha-1,3-mannosyl-glycoprotein 2-beta-N-acetylglucosaminyltransferase	MGAT1_MOUSE	30.943%	4.52e-23	K00726	2.4.1.101	Metabolism|Glycan biosynthesis and metabolism|N-Glycan biosynthesis [PATH:ko00510]|alpha-1,3-mannosyl-glycoprotein beta-1,2-N-acetylglucosaminyltransferase [EC:2.4.1.101]	Metabolism|Glycan biosynthesis and metabolism|Various types of N-glycan biosynthesis [PATH:ko00513]|alpha-1,3-mannosyl-glycoprotein beta-1,2-N-acetylglucosaminyltransferase [EC:2.4.1.101]	Brite Hierarchies|Protein families: metabolism|Glycosyltransferases [BR:ko01003]|alpha-1,3-mannosyl-glycoprotein beta-1,2-N-acetylglucosaminyltransferase [EC:2.4.1.101]
Thraus_T3518	Peptidyl-prolyl cis-trans isomerase-like 1	PPIL1_ASPFU	75.904%	3.21e-42	K12733	5.2.1.8	Genetic Information Processing|Transcription|Spliceosome [PATH:ko03040]|peptidyl-prolyl cis-trans isomerase-like 1 [EC:5.2.1.8]	Brite Hierarchies|Protein families: genetic information processing|Spliceosome [BR:ko03041]|peptidyl-prolyl cis-trans isomerase-like 1 [EC:5.2.1.8]	Brite Hierarchies|Protein families: genetic information processing|Chaperones and folding catalysts [BR:ko03110]|peptidyl-prolyl cis-trans isomerase-like 1 [EC:5.2.1.8]
Thraus_T4544	von Willebrand factor A domain-containing protein 8	VWA8_HUMAN	55.367%	4.9e-55	NO_KO_DATA	NO_EC_NUMBER	NO_KO_DATA
Thraus_T3516	Peroxisome biogenesis factor 2	PEX2_DICDI	31.727%	7.64e-37	K06664	NO_EC_NUMBER	Cellular Processes|Transport and catabolism|Peroxisome [PATH:ko04146]|peroxin-2	Brite Hierarchies|Protein families: genetic information processing|Ubiquitin system [BR:ko04121]|peroxin-2
Thraus_T3835	DExH-box ATP-dependent RNA helicase DExH1 {ECO:0000305}	DEXH1_ARATH	43.325%	0	K14442	3.6.4.13	Genetic Information Processing|Folding, sorting and degradation|RNA degradation [PATH:ko03018]|ATP-dependent RNA helicase DHX36 [EC:3.6.4.13]	Brite Hierarchies|Protein families: genetic information processing|Messenger RNA biogenesis [BR:ko03019]|ATP-dependent RNA helicase DHX36 [EC:3.6.4.13]
Thraus_T3514	N-terminal acetyltransferase A complex catalytic subunit NAA10 {ECO:0000303|PubMed:25966763}	NAA10_ARATH	74.615%	4.41e-67	K20791	2.3.1.255	Brite Hierarchies|Protein families: genetic information processing|Chromosome and associated proteins [BR:ko03036]|N-alpha-acetyltransferase 10/11 [EC:2.3.1.255]
Thraus_T3515	Protein disulfide-isomerase-like protein EhSep2	SEP2_EMIHU	50.575%	2.9e-26	NO_KO_DATA	NO_EC_NUMBER	NO_KO_DATA
Thraus_T3512	Mediator of RNA polymerase II transcription subunit 6	MED6_BOVIN	47.656%	1.99e-34	K15128	NO_EC_NUMBER	Brite Hierarchies|Protein families: genetic information processing|Transcription machinery [BR:ko03021]|mediator of RNA polymerase II transcription subunit 6
Thraus_T3805	tRNA (guanosine(18)-2'-O)-methyltransferase {ECO:0000255|HAMAP-Rule:MF_02060}	TRMH_SHIFL	47.26%	8.61e-40	K00556	2.1.1.34	Brite Hierarchies|Protein families: genetic information processing|Transfer RNA biogenesis [BR:ko03016]|tRNA (guanosine-2'-O-)-methyltransferase [EC:2.1.1.34]
Thraus_T3510	ATP-binding cassette sub-family B member 7, mitochondrial	ABCB7_HUMAN	50.357%	0	K05662	NO_EC_NUMBER	Environmental Information Processing|Membrane transport|ABC transporters [PATH:ko02010]|ATP-binding cassette, subfamily B (MDR/TAP), member 7	Brite Hierarchies|Protein families: signaling and cellular processes|Transporters [BR:ko02000]|ATP-binding cassette, subfamily B (MDR/TAP), member 7
Thraus_T3511	ATP-binding cassette sub-family B member 6, mitochondrial	ABCB6_MOUSE	39.298%	3.6e-134	K05661	NO_EC_NUMBER	Environmental Information Processing|Membrane transport|ABC transporters [PATH:ko02010]|ATP-binding cassette, subfamily B (MDR/TAP), member 6	Brite Hierarchies|Protein families: signaling and cellular processes|Transporters [BR:ko02000]|ATP-binding cassette, subfamily B (MDR/TAP), member 6
Thraus_T3717	Leucine-rich repeat-containing protein 49	LRC49_MOUSE	38.743%	3.6e-21	K16606	NO_EC_NUMBER	Brite Hierarchies|Protein families: signaling and cellular processes|Cytoskeleton proteins [BR:ko04812]|leucine-rich repeat-containing protein 49
Thraus_T3560	Calcium-dependent protein kinase 32 {ECO:0000303|Ref.5}	CDPKW_ARATH	45.933%	7.96e-58	K13412	2.7.11.1	Organismal Systems|Environmental adaptation|Plant-pathogen interaction [PATH:ko04626]|calcium-dependent protein kinase [EC:2.7.11.1]	Human Diseases|Infectious disease: parasitic|Toxoplasmosis [PATH:ko05145]|calcium-dependent protein kinase [EC:2.7.11.1]	Brite Hierarchies|Protein families: metabolism|Protein kinases [BR:ko01001]|calcium-dependent protein kinase [EC:2.7.11.1]
Thraus_T4942	Homoserine kinase {ECO:0000255|HAMAP-Rule:MF_00384}	KHSE_CARHZ	38.127%	2.47e-45	K00872	2.7.1.39	Metabolism|Amino acid metabolism|Glycine, serine and threonine metabolism [PATH:ko00260]|homoserine kinase [EC:2.7.1.39]
Thraus_T3836	CBL-interacting protein kinase 8	CIPK8_ORYSJ	57.303%	6.61e-98	NO_KO_DATA	NO_EC_NUMBER	NO_KO_DATA
Thraus_T3426	Aminomethyltransferase, mitochondrial	GCST_PEA	56.604%	3.06e-11	NO_KO_DATA	NO_EC_NUMBER	NO_KO_DATA
Thraus_T4515	Glyceraldehyde-3-phosphate dehydrogenase-like protein {ECO:0000255|RuleBase:RU361160}	GAP2_PSEAB	53.963%	4.49e-114	K00134	1.2.1.12	Metabolism|Carbohydrate metabolism|Glycolysis / Gluconeogenesis [PATH:ko00010]|glyceraldehyde 3-phosphate dehydrogenase [EC:1.2.1.12]	Metabolism|Energy metabolism|Carbon fixation in photosynthetic organisms [PATH:ko00710]|glyceraldehyde 3-phosphate dehydrogenase [EC:1.2.1.12]	Environmental Information Processing|Signal transduction|HIF-1 signaling pathway [PATH:ko04066]|glyceraldehyde 3-phosphate dehydrogenase [EC:1.2.1.12]	Human Diseases|Neurodegenerative disease|Alzheimer disease [PATH:ko05010]|glyceraldehyde 3-phosphate dehydrogenase [EC:1.2.1.12]	Human Diseases|Infectious disease: bacterial|Pathogenic Escherichia coli infection [PATH:ko05130]|glyceraldehyde 3-phosphate dehydrogenase [EC:1.2.1.12]	Brite Hierarchies|Protein families: genetic information processing|Membrane trafficking [BR:ko04131]|glyceraldehyde 3-phosphate dehydrogenase [EC:1.2.1.12]	Brite Hierarchies|Protein families: signaling and cellular processes|Exosome [BR:ko04147]|glyceraldehyde 3-phosphate dehydrogenase [EC:1.2.1.12]
Thraus_T3806	Probable U6 snRNA-associated Sm-like protein LSm4	LSM4_TOBAC	61.728%	1.79e-32	NO_KO_DATA	NO_EC_NUMBER	NO_KO_DATA
Thraus_T5041	ABC transporter G family member 1	ABCG1_DICDI	43.172%	9.67e-40	NO_KO_DATA	NO_EC_NUMBER	NO_KO_DATA
Thraus_T5051	Cystinosin	CTNS_HUMAN	45.106%	6.3e-62	K12386	NO_EC_NUMBER	Cellular Processes|Transport and catabolism|Lysosome [PATH:ko04142]|cystinosin	Brite Hierarchies|Protein families: signaling and cellular processes|Exosome [BR:ko04147]|cystinosin
Thraus_T3425	Mitochondrial substrate carrier family protein B	MCFB_DICDI	32.616%	2.78e-47	K14684	NO_EC_NUMBER	Brite Hierarchies|Protein families: signaling and cellular processes|Transporters [BR:ko02000]|solute carrier family 25 (mitochondrial phosphate transporter), member 23/24/25/41
Thraus_T3934	Guanine nucleotide-binding protein subunit beta-like protein	GBLP_CANAL	29.474%	3.63e-13	K14753	NO_EC_NUMBER	Human Diseases|Infectious disease: viral|Measles [PATH:ko05162]|guanine nucleotide-binding protein subunit beta-2-like 1 protein	Brite Hierarchies|Protein families: genetic information processing|Messenger RNA biogenesis [BR:ko03019]|guanine nucleotide-binding protein subunit beta-2-like 1 protein	Brite Hierarchies|Protein families: signaling and cellular processes|Exosome [BR:ko04147]|guanine nucleotide-binding protein subunit beta-2-like 1 protein
Thraus_T3459	Cytoplasmic 60S subunit biogenesis factor REI1 homolog 2 {ECO:0000305}	REIL2_ARATH	29.29%	5.76e-23	K14816	NO_EC_NUMBER	Brite Hierarchies|Protein families: genetic information processing|Ribosome biogenesis [BR:ko03009]|pre-60S factor REI1
Thraus_T3935	Probable enoyl-CoA hydratase 2, mitochondrial {ECO:0000305}	ECH2M_ARATH	39.535%	3e-38	K05607	4.2.1.18	Metabolism|Amino acid metabolism|Valine, leucine and isoleucine degradation [PATH:ko00280]|methylglutaconyl-CoA hydratase [EC:4.2.1.18]
Thraus_T4158	Minor histocompatibility antigen H13	HM13_HUMAN	35.849%	1.22e-44	K09595	3.4.23.-	Brite Hierarchies|Protein families: metabolism|Peptidases and inhibitors [BR:ko01002]|minor histocompatibility antigen H13 [EC:3.4.23.-]
Thraus_T2339	MORN repeat-containing protein 3	MORN3_XENLA	40%	1.85e-39	NO_KO_DATA	NO_EC_NUMBER	NO_KO_DATA
Thraus_T3936	Ankyrin-2	ANK2_HUMAN	33.714%	2.43e-18	K10380	NO_EC_NUMBER	Organismal Systems|Immune system|Toll and Imd signaling pathway [PATH:ko04624]|ankyrin	Human Diseases|Cancer: overview|Proteoglycans in cancer [PATH:ko05205]|ankyrin	Brite Hierarchies|Protein families: signaling and cellular processes|Cytoskeleton proteins [BR:ko04812]|ankyrin
Thraus_T5108	L-galactono-1,4-lactone dehydrogenase, mitochondrial	GLDH_ARATH	44.372%	8.21e-122	K00225	1.3.2.3	Metabolism|Carbohydrate metabolism|Ascorbate and aldarate metabolism [PATH:ko00053]|L-galactono-1,4-lactone dehydrogenase [EC:1.3.2.3]
Thraus_T5107	3'(2'),5'-bisphosphate nucleotidase 1	BPNT1_DICDI	31.9%	1.01e-22	K01082	3.1.3.7	Metabolism|Energy metabolism|Sulfur metabolism [PATH:ko00920]|3'(2'), 5'-bisphosphate nucleotidase [EC:3.1.3.7]	Brite Hierarchies|Protein families: genetic information processing|Transfer RNA biogenesis [BR:ko03016]|3'(2'), 5'-bisphosphate nucleotidase [EC:3.1.3.7]
Thraus_T2334	Inactive C-alpha-formylglycine-generating enzyme 2 {ECO:0000305}	SUMF2_BOVIN	45.455%	1.95e-71	NO_KO_DATA	NO_EC_NUMBER	NO_KO_DATA
Thraus_T2337	Costars family protein ABRACL	ABRAL_COTCO	50.633%	3.54e-12	NO_KO_DATA	NO_EC_NUMBER	NO_KO_DATA
Thraus_T3937	ATP-binding cassette sub-family B member 10, mitochondrial	ABCBA_HUMAN	44.882%	5.32e-126	K05657	NO_EC_NUMBER	Environmental Information Processing|Membrane transport|ABC transporters [PATH:ko02010]|ATP-binding cassette, subfamily B (MDR/TAP), member 10	Brite Hierarchies|Protein families: signaling and cellular processes|Transporters [BR:ko02000]|ATP-binding cassette, subfamily B (MDR/TAP), member 10
Thraus_T2331	Acetylornithine deacetylase	ARGE_ARATH	55.288%	3.03e-71	K01438	3.5.1.16	Metabolism|Amino acid metabolism|Arginine biosynthesis [PATH:ko00220]|acetylornithine deacetylase [EC:3.5.1.16]
Thraus_T5102	Mitochondrial carrier protein CoAc1 {ECO:0000305}	COAC1_ARATH	26.562%	1.38e-06	NO_KO_DATA	NO_EC_NUMBER	NO_KO_DATA
Thraus_T5101	Xylose isomerase	XYLA_ARATH	51.629%	6.2e-143	K01805	5.3.1.5	Metabolism|Carbohydrate metabolism|Pentose and glucuronate interconversions [PATH:ko00040]|xylose isomerase [EC:5.3.1.5]	Metabolism|Carbohydrate metabolism|Fructose and mannose metabolism [PATH:ko00051]|xylose isomerase [EC:5.3.1.5]
Thraus_T2332	Glutamine--fructose-6-phosphate aminotransferase [isomerizing] {ECO:0000255|HAMAP-Rule:MF_00164}	GLMS_CHLTE	55.76%	0	K00820	2.6.1.16	Metabolism|Carbohydrate metabolism|Amino sugar and nucleotide sugar metabolism [PATH:ko00520]|glutamine---fructose-6-phosphate transaminase (isomerizing) [EC:2.6.1.16]	Metabolism|Amino acid metabolism|Alanine, aspartate and glutamate metabolism [PATH:ko00250]|glutamine---fructose-6-phosphate transaminase (isomerizing) [EC:2.6.1.16]	Human Diseases|Endocrine and metabolic disease|Insulin resistance [PATH:ko04931]|glutamine---fructose-6-phosphate transaminase (isomerizing) [EC:2.6.1.16]	Brite Hierarchies|Protein families: metabolism|Peptidases and inhibitors [BR:ko01002]|glutamine---fructose-6-phosphate transaminase (isomerizing) [EC:2.6.1.16]
Thraus_T4672	3-isopropylmalate dehydrogenase {ECO:0000255|HAMAP-Rule:MF_01033}	LEU3_MANSM	44.722%	1.33e-91	K00052	1.1.1.85	Metabolism|Carbohydrate metabolism|C5-Branched dibasic acid metabolism [PATH:ko00660]|3-isopropylmalate dehydrogenase [EC:1.1.1.85]	Metabolism|Amino acid metabolism|Valine, leucine and isoleucine biosynthesis [PATH:ko00290]|3-isopropylmalate dehydrogenase [EC:1.1.1.85]
Thraus_T4673	Chaperone protein DnaJ {ECO:0000255|HAMAP-Rule:MF_01152}	DNAJ_ZYMMO	48.571%	4.75e-16	K03686	NO_EC_NUMBER	Brite Hierarchies|Protein families: genetic information processing|Chaperones and folding catalysts [BR:ko03110]|molecular chaperone DnaJ	Brite Hierarchies|Protein families: genetic information processing|Mitochondrial biogenesis [BR:ko03029]|molecular chaperone DnaJ
Thraus_T4670	Importin subunit alpha-4 {ECO:0000305}	IMPA4_ARATH	49.459%	2.51e-107	K15042	NO_EC_NUMBER	Human Diseases|Infectious disease: viral|Influenza A [PATH:ko05164]|importin subunit alpha-5/6/7	Brite Hierarchies|Protein families: genetic information processing|Chromosome and associated proteins [BR:ko03036]|importin subunit alpha-5/6/7
Thraus_T4671	Kinesin-like protein KIN-14E {ECO:0000305}	KN14E_ARATH	51.299%	1.52e-92	NO_KO_DATA	NO_EC_NUMBER	NO_KO_DATA
Thraus_T4676	Alpha-soluble NSF attachment protein	SNAP_DROME	37.413%	5.66e-50	K15296	NO_EC_NUMBER	Cellular Processes|Transport and catabolism|Autophagy - yeast [PATH:ko04138]|alpha-soluble NSF attachment protein	Organismal Systems|Nervous system|Synaptic vesicle cycle [PATH:ko04721]|alpha-soluble NSF attachment protein	Brite Hierarchies|Protein families: genetic information processing|Membrane trafficking [BR:ko04131]|alpha-soluble NSF attachment protein
Thraus_T4677	Ras-related protein Rab-2-A	RAB2A_MAIZE	83.436%	3e-98	K07877	NO_EC_NUMBER	Environmental Information Processing|Signal transduction|AMPK signaling pathway [PATH:ko04152]|Ras-related protein Rab-2A	Brite Hierarchies|Protein families: genetic information processing|Membrane trafficking [BR:ko04131]|Ras-related protein Rab-2A	Brite Hierarchies|Protein families: signaling and cellular processes|Exosome [BR:ko04147]|Ras-related protein Rab-2A	Brite Hierarchies|Protein families: signaling and cellular processes|GTP-binding proteins [BR:ko04031]|Ras-related protein Rab-2A
Thraus_T828	Reticulon-4-interacting protein 1, mitochondrial	RT4I1_BOVIN	30.645%	1.84e-36	K23164	NO_EC_NUMBER	Brite Hierarchies|Protein families: genetic information processing|Mitochondrial biogenesis [BR:ko03029]|reticulon-4-interacting protein 1, mitochondrial
Thraus_T829	Probable phospholipid hydroperoxide glutathione peroxidase	GPX4_MESCR	53.061%	6.01e-07	NO_KO_DATA	NO_EC_NUMBER	NO_KO_DATA
Thraus_T826	2-oxoglutarate dehydrogenase, mitochondrial	ODO1_DICDI	45.254%	6.46e-180	K00164	1.2.4.2	Metabolism|Carbohydrate metabolism|Citrate cycle (TCA cycle) [PATH:ko00020]|2-oxoglutarate dehydrogenase E1 component [EC:1.2.4.2]
Thraus_T827	Phosphatidylethanolamine N-methyltransferase {ECO:0000255|HAMAP-Rule:MF_03217}	CHO2_COCP7	33.661%	2.16e-65	K16369	2.1.1.17	Metabolism|Lipid metabolism|Glycerophospholipid metabolism [PATH:ko00564]|phosphatidylethanolamine N-methyltransferase [EC:2.1.1.17]
Thraus_T824	Transcription and mRNA export factor ENY2 {ECO:0000255|HAMAP-Rule:MF_03046}	ENY2_MOUSE	67.213%	1.01e-28	K11368	NO_EC_NUMBER	Brite Hierarchies|Protein families: genetic information processing|Transcription machinery [BR:ko03021]|enhancer of yellow 2 transcription factor	Brite Hierarchies|Protein families: genetic information processing|Messenger RNA biogenesis [BR:ko03019]|enhancer of yellow 2 transcription factor	Brite Hierarchies|Protein families: genetic information processing|Chromosome and associated proteins [BR:ko03036]|enhancer of yellow 2 transcription factor
Thraus_T825	CBL-interacting serine/threonine-protein kinase 24	CIPKO_ARATH	34.4%	7.45e-31	NO_KO_DATA	NO_EC_NUMBER	NO_KO_DATA
Thraus_T822	Actin	ACT_ACHBI	71.206%	2.15e-126	NO_KO_DATA	NO_EC_NUMBER	NO_KO_DATA
Thraus_T823	Vesicle transport v-SNARE 11	VTI11_ARATH	26.396%	5.23e-07	K08493	NO_EC_NUMBER	Genetic Information Processing|Folding, sorting and degradation|SNARE interactions in vesicular transport [PATH:ko04130]|vesicle transport through interaction with t-SNAREs 1	Cellular Processes|Transport and catabolism|Autophagy - yeast [PATH:ko04138]|vesicle transport through interaction with t-SNAREs 1	Brite Hierarchies|Protein families: genetic information processing|Membrane trafficking [BR:ko04131]|vesicle transport through interaction with t-SNAREs 1
Thraus_T820	Ankyrin repeat and KH domain-containing protein mask	ANKHM_DROME	36.207%	3.77e-19	K16726	NO_EC_NUMBER	Brite Hierarchies|Protein families: genetic information processing|Chromosome and associated proteins [BR:ko03036]|ankyrin repeat domain-containing protein 17
Thraus_T821	Putative tricarboxylate transport protein, mitochondrial	TXTP_CAEEL	29.502%	1.31e-14	K15100	NO_EC_NUMBER	Brite Hierarchies|Protein families: signaling and cellular processes|Transporters [BR:ko02000]|solute carrier family 25 (mitochondrial citrate transporter), member 1
Thraus_T2964	3-[(3aS,4S,7aS)-7a-methyl-1,5-dioxo-octahydro-1H-inden-4-yl]propanoyl:CoA ligase {ECO:0000303|PubMed:23146019}	FAD3_RHOJR	52.113%	1.86e-39	K18687	6.2.1.41	Metabolism|Xenobiotics biodegradation and metabolism|Steroid degradation [PATH:ko00984]|HIP---CoA ligase [EC:6.2.1.41]
Thraus_T4513	Uncharacterized protein C57A7.06	YDM6_SCHPO	45.714%	4.64e-14	K14567	NO_EC_NUMBER	Genetic Information Processing|Translation|Ribosome biogenesis in eukaryotes [PATH:ko03008]|U3 small nucleolar RNA-associated protein 14	Brite Hierarchies|Protein families: genetic information processing|Ribosome biogenesis [BR:ko03009]|U3 small nucleolar RNA-associated protein 14
Thraus_T5460	Brefeldin A-inhibited guanine nucleotide-exchange protein 2	BIG2_RAT	38.554%	4.21e-13	K18442	NO_EC_NUMBER	Cellular Processes|Transport and catabolism|Endocytosis [PATH:ko04144]|brefeldin A-inhibited guanine nucleotide-exchange protein	Brite Hierarchies|Protein families: genetic information processing|Membrane trafficking [BR:ko04131]|brefeldin A-inhibited guanine nucleotide-exchange protein
Thraus_T2301	Protein fantom	FTM_MOUSE	27.002%	1.37e-40	K16550	NO_EC_NUMBER	Brite Hierarchies|Protein families: metabolism|Protein phosphatases and associated proteins [BR:ko01009]|protein fantom	Brite Hierarchies|Protein families: genetic information processing|Chromosome and associated proteins [BR:ko03036]|protein fantom
Thraus_T2939	Kinesin-like protein KIF18B	KI18B_HUMAN	35.519%	2.66e-47	NO_KO_DATA	NO_EC_NUMBER	NO_KO_DATA
Thraus_T2938	G1/S-specific cyclin-E	CCNE_HEMPU	50%	2.37e-19	NO_KO_DATA	NO_EC_NUMBER	NO_KO_DATA
Thraus_T5549	Protein disulfide-isomerase A6	PDIA6_MOUSE	31.84%	4.19e-42	K09584	5.3.4.1	Genetic Information Processing|Folding, sorting and degradation|Protein processing in endoplasmic reticulum [PATH:ko04141]|protein disulfide-isomerase A6 [EC:5.3.4.1]	Brite Hierarchies|Protein families: genetic information processing|Chaperones and folding catalysts [BR:ko03110]|protein disulfide-isomerase A6 [EC:5.3.4.1]	Brite Hierarchies|Protein families: genetic information processing|Membrane trafficking [BR:ko04131]|protein disulfide-isomerase A6 [EC:5.3.4.1]
Thraus_T4428	DNA polymerase delta catalytic subunit	DPOD_SCHPO	52.558%	0	K02327	2.7.7.7	Genetic Information Processing|Replication and repair|DNA replication [PATH:ko03030]|DNA polymerase delta subunit 1 [EC:2.7.7.7]	Genetic Information Processing|Replication and repair|Base excision repair [PATH:ko03410]|DNA polymerase delta subunit 1 [EC:2.7.7.7]	Genetic Information Processing|Replication and repair|Nucleotide excision repair [PATH:ko03420]|DNA polymerase delta subunit 1 [EC:2.7.7.7]	Genetic Information Processing|Replication and repair|Mismatch repair [PATH:ko03430]|DNA polymerase delta subunit 1 [EC:2.7.7.7]	Genetic Information Processing|Replication and repair|Homologous recombination [PATH:ko03440]|DNA polymerase delta subunit 1 [EC:2.7.7.7]	Brite Hierarchies|Protein families: genetic information processing|DNA replication proteins [BR:ko03032]|DNA polymerase delta subunit 1 [EC:2.7.7.7]	Brite Hierarchies|Protein families: genetic information processing|DNA repair and recombination proteins [BR:ko03400]|DNA polymerase delta subunit 1 [EC:2.7.7.7]
Thraus_T2933	tRNA (cytidine(34)-2'-O)-methyltransferase {ECO:0000255|HAMAP-Rule:MF_01885}	TRML_SACD2	39.873%	3.14e-32	K03216	2.1.1.207	Brite Hierarchies|Protein families: genetic information processing|Transfer RNA biogenesis [BR:ko03016]|tRNA (cytidine/uridine-2'-O-)-methyltransferase [EC:2.1.1.207]
Thraus_T4180	Protein CASP	CASP_HUMAN	33.133%	4.35e-12	K09313	NO_EC_NUMBER	Brite Hierarchies|Protein families: genetic information processing|Transcription factors [BR:ko03000]|homeobox protein cut-like
Thraus_T2931	Trafficking protein particle complex subunit 6b {ECO:0000303|PubMed:28626029}	TPC6B_DANRE	37.162%	1.46e-31	K20304	NO_EC_NUMBER	Brite Hierarchies|Protein families: genetic information processing|Membrane trafficking [BR:ko04131]|trafficking protein particle complex subunit 6
Thraus_T2930	Monoterpene epsilon-lactone hydrolase {ECO:0000303|PubMed:11157238}	MLHB_RHOER	28.846%	1.23e-13	K14731	3.1.1.83	Metabolism|Metabolism of terpenoids and polyketides|Limonene and pinene degradation [PATH:ko00903]|epsilon-lactone hydrolase [EC:3.1.1.83]	Metabolism|Xenobiotics biodegradation and metabolism|Caprolactam degradation [PATH:ko00930]|epsilon-lactone hydrolase [EC:3.1.1.83]
Thraus_T2937	Leucine--tRNA ligase	SYLC_CAEEL	52.917%	0	K01869	6.1.1.4	Genetic Information Processing|Translation|Aminoacyl-tRNA biosynthesis [PATH:ko00970]|leucyl-tRNA synthetase [EC:6.1.1.4]	Brite Hierarchies|Protein families: metabolism|Amino acid related enzymes [BR:ko01007]|leucyl-tRNA synthetase [EC:6.1.1.4]	Brite Hierarchies|Protein families: genetic information processing|Transfer RNA biogenesis [BR:ko03016]|leucyl-tRNA synthetase [EC:6.1.1.4]	Brite Hierarchies|Protein families: genetic information processing|Mitochondrial biogenesis [BR:ko03029]|leucyl-tRNA synthetase [EC:6.1.1.4]
Thraus_T5216	Eukaryotic translation initiation factor 3 subunit C {ECO:0000255|HAMAP-Rule:MF_03002}	EIF3C_MEDTR	42.29%	7.23e-102	NO_KO_DATA	NO_EC_NUMBER	NO_KO_DATA
Thraus_T2935	Phosphatidylinositol 4-phosphate 5-kinase 8	PI5K8_ARATH	46.939%	1.89e-07	K00889	2.7.1.68	Metabolism|Carbohydrate metabolism|Inositol phosphate metabolism [PATH:ko00562]|1-phosphatidylinositol-4-phosphate 5-kinase [EC:2.7.1.68]	Environmental Information Processing|Signal transduction|MAPK signaling pathway - yeast [PATH:ko04011]|1-phosphatidylinositol-4-phosphate 5-kinase [EC:2.7.1.68]	Environmental Information Processing|Signal transduction|Phosphatidylinositol signaling system [PATH:ko04070]|1-phosphatidylinositol-4-phosphate 5-kinase [EC:2.7.1.68]	Environmental Information Processing|Signal transduction|Phospholipase D signaling pathway [PATH:ko04072]|1-phosphatidylinositol-4-phosphate 5-kinase [EC:2.7.1.68]	Cellular Processes|Transport and catabolism|Endocytosis [PATH:ko04144]|1-phosphatidylinositol-4-phosphate 5-kinase [EC:2.7.1.68]	Cellular Processes|Transport and catabolism|Mitophagy - yeast [PATH:ko04139]|1-phosphatidylinositol-4-phosphate 5-kinase [EC:2.7.1.68]	Cellular Processes|Cell motility|Regulation of actin cytoskeleton [PATH:ko04810]|1-phosphatidylinositol-4-phosphate 5-kinase [EC:2.7.1.68]	Organismal Systems|Immune system|Fc gamma R-mediated phagocytosis [PATH:ko04666]|1-phosphatidylinositol-4-phosphate 5-kinase [EC:2.7.1.68]	Human Diseases|Cancer: overview|Choline metabolism in cancer [PATH:ko05231]|1-phosphatidylinositol-4-phosphate 5-kinase [EC:2.7.1.68]	Human Diseases|Infectious disease: bacterial|Yersinia infection [PATH:ko05135]|1-phosphatidylinositol-4-phosphate 5-kinase [EC:2.7.1.68]	Brite Hierarchies|Protein families: genetic information processing|Membrane trafficking [BR:ko04131]|1-phosphatidylinositol-4-phosphate 5-kinase [EC:2.7.1.68]
Thraus_T2934	tRNA N(3)-methylcytidine methyltransferase METTL6 {ECO:0000305}	METL6_HUMAN	38.136%	2.07e-15	K00599	2.1.1.-	Not Included in Pathway or Brite|Unclassified: metabolism|Enzymes with EC numbers|methyltransferase-like protein 6 [EC:2.1.1.-]
Thraus_T1222	Probable dual-specificity RNA methyltransferase RlmN {ECO:0000255|HAMAP-Rule:MF_01849}	RLMN_CLONN	38.421%	2.88e-30	K06941	2.1.1.192	Brite Hierarchies|Protein families: genetic information processing|Ribosome biogenesis [BR:ko03009]|23S rRNA (adenine2503-C2)-methyltransferase [EC:2.1.1.192]
Thraus_T1223	Probable serine/threonine-protein kinase dyrk2	DYRK2_DICDI	46.471%	9.59e-39	K18669	2.7.12.1	Cellular Processes|Cell growth and death|Cell cycle - yeast [PATH:ko04111]|dual specificity tyrosine-phosphorylation-regulated kinase 2/3/4 [EC:2.7.12.1]	Brite Hierarchies|Protein families: metabolism|Protein kinases [BR:ko01001]|dual specificity tyrosine-phosphorylation-regulated kinase 2/3/4 [EC:2.7.12.1]
Thraus_T1221	Sperm-egg fusion protein Juno {ECO:0000305}	JUNO_MOUSE	33.333%	1.12e-11	K13649	NO_EC_NUMBER	Cellular Processes|Transport and catabolism|Endocytosis [PATH:ko04144]|folate receptor	Human Diseases|Drug resistance: antineoplastic|Antifolate resistance [PATH:ko01523]|folate receptor	Brite Hierarchies|Protein families: signaling and cellular processes|Transporters [BR:ko02000]|folate receptor	Brite Hierarchies|Protein families: signaling and cellular processes|Exosome [BR:ko04147]|folate receptor	Brite Hierarchies|Protein families: signaling and cellular processes|Glycosylphosphatidylinositol (GPI)-anchored proteins [BR:ko00537]|folate receptor
Thraus_T1227	Actin-depolymerizing factor 2	ADF2_ORYSJ	29.688%	1.26e-16	K05765	NO_EC_NUMBER	Cellular Processes|Cell motility|Regulation of actin cytoskeleton [PATH:ko04810]|cofilin	Organismal Systems|Immune system|Fc gamma R-mediated phagocytosis [PATH:ko04666]|cofilin	Organismal Systems|Development and regeneration|Axon guidance [PATH:ko04360]|cofilin	Human Diseases|Infectious disease: bacterial|Pertussis [PATH:ko05133]|cofilin	Human Diseases|Infectious disease: viral|Human immunodeficiency virus 1 infection [PATH:ko05170]|cofilin	Brite Hierarchies|Protein families: genetic information processing|Membrane trafficking [BR:ko04131]|cofilin	Brite Hierarchies|Protein families: signaling and cellular processes|Cytoskeleton proteins [BR:ko04812]|cofilin	Brite Hierarchies|Protein families: signaling and cellular processes|Exosome [BR:ko04147]|cofilin
Thraus_T1224	UDP-galactose translocator	S35A2_MOUSE	46.581%	7.33e-47	K15272	NO_EC_NUMBER	Brite Hierarchies|Protein families: signaling and cellular processes|Transporters [BR:ko02000]|solute carrier family 35 (UDP-sugar transporter), member A1/2/3
Thraus_T1225	Chloronitrobenzene nitroreductase {ECO:0000303|PubMed:16517619}	CNBA_COMTE	33.803%	7.04e-30	NO_KO_DATA	NO_EC_NUMBER	NO_KO_DATA
Thraus_T1228	Transmembrane emp24 domain-containing protein 10	TMEDA_MOUSE	40.58%	9.73e-22	K20352	NO_EC_NUMBER	Human Diseases|Infectious disease: bacterial|Pathogenic Escherichia coli infection [PATH:ko05130]|p24 family protein delta-1	Brite Hierarchies|Protein families: genetic information processing|Membrane trafficking [BR:ko04131]|p24 family protein delta-1	Brite Hierarchies|Protein families: signaling and cellular processes|Transporters [BR:ko02000]|p24 family protein delta-1
Thraus_T5596	Cytosolic carboxypeptidase-like protein 5	CBPC5_RAT	43.218%	2.04e-70	K23438	3.4.17.-	Brite Hierarchies|Protein families: metabolism|Peptidases and inhibitors [BR:ko01002]|cytosolic carboxypeptidase-like protein 5 [EC:3.4.17.-]
Thraus_T3049	Putative oxidoreductase SadH	SADH_MYCTU	38.034%	3.96e-28	NO_KO_DATA	NO_EC_NUMBER	NO_KO_DATA
Thraus_T5059	V-type proton ATPase catalytic subunit A	VATA_DICDI	71.831%	4.1e-29	K02145	7.1.2.2	Metabolism|Energy metabolism|Oxidative phosphorylation [PATH:ko00190]|V-type H+-transporting ATPase subunit A [EC:7.1.2.2]	Environmental Information Processing|Signal transduction|mTOR signaling pathway [PATH:ko04150]|V-type H+-transporting ATPase subunit A [EC:7.1.2.2]	Cellular Processes|Transport and catabolism|Phagosome [PATH:ko04145]|V-type H+-transporting ATPase subunit A [EC:7.1.2.2]	Organismal Systems|Excretory system|Collecting duct acid secretion [PATH:ko04966]|V-type H+-transporting ATPase subunit A [EC:7.1.2.2]	Organismal Systems|Nervous system|Synaptic vesicle cycle [PATH:ko04721]|V-type H+-transporting ATPase subunit A [EC:7.1.2.2]	Human Diseases|Immune disease|Rheumatoid arthritis [PATH:ko05323]|V-type H+-transporting ATPase subunit A [EC:7.1.2.2]	Human Diseases|Infectious disease: bacterial|Vibrio cholerae infection [PATH:ko05110]|V-type H+-transporting ATPase subunit A [EC:7.1.2.2]	Human Diseases|Infectious disease: bacterial|Epithelial cell signaling in Helicobacter pylori infection [PATH:ko05120]|V-type H+-transporting ATPase subunit A [EC:7.1.2.2]	Human Diseases|Infectious disease: viral|Human papillomavirus infection [PATH:ko05165]|V-type H+-transporting ATPase subunit A [EC:7.1.2.2]
Thraus_T5544	Phospholipid-transporting ATPase 3 {ECO:0000303|PubMed:11402198}	ALA3_ARATH	49.383%	1.49e-17	K14802	7.6.2.1	Brite Hierarchies|Protein families: genetic information processing|Ribosome biogenesis [BR:ko03009]|phospholipid-transporting ATPase [EC:7.6.2.1]
Thraus_T3456	COBW domain-containing protein DDB_G0274527	Y4527_DICDI	23.724%	4.95e-10	NO_KO_DATA	NO_EC_NUMBER	NO_KO_DATA
Thraus_T5543	FAD-linked sulfhydryl oxidase ALR	ALR_MOUSE	42.742%	3.85e-30	K17783	1.8.3.2	Brite Hierarchies|Protein families: genetic information processing|Mitochondrial biogenesis [BR:ko03029]|mitochondrial FAD-linked sulfhydryl oxidase [EC:1.8.3.2]
Thraus_T3379	Mitogen-activated protein kinase 4b {ECO:0000303|PubMed:27268428}	MPK4B_PHYPA	61.2%	1.42e-113	NO_KO_DATA	NO_EC_NUMBER	NO_KO_DATA
Thraus_T1439	Brefeldin A-inhibited guanine nucleotide-exchange protein 1	BIG1_MOUSE	41.918%	5.37e-67	K18442	NO_EC_NUMBER	Cellular Processes|Transport and catabolism|Endocytosis [PATH:ko04144]|brefeldin A-inhibited guanine nucleotide-exchange protein	Brite Hierarchies|Protein families: genetic information processing|Membrane trafficking [BR:ko04131]|brefeldin A-inhibited guanine nucleotide-exchange protein
Thraus_T4511	Sodium/potassium/calcium exchanger 2	NCKX2_RAT	44.423%	8.26e-126	K13750	NO_EC_NUMBER	Brite Hierarchies|Protein families: signaling and cellular processes|Transporters [BR:ko02000]|solute carrier family 24 (sodium/potassium/calcium exchanger), member 2
Thraus_T3235	Chaperone protein DnaJ {ECO:0000255|HAMAP-Rule:MF_01152}	DNAJ_GLOC7	54.348%	1.39e-07	K03686	NO_EC_NUMBER	Brite Hierarchies|Protein families: genetic information processing|Chaperones and folding catalysts [BR:ko03110]|molecular chaperone DnaJ	Brite Hierarchies|Protein families: genetic information processing|Mitochondrial biogenesis [BR:ko03029]|molecular chaperone DnaJ
Thraus_T1438	Protein SGT1 homolog {ECO:0000250|UniProtKB:Q08446}	SGT1_RAT	29.72%	1.31e-22	K12795	NO_EC_NUMBER	Organismal Systems|Immune system|NOD-like receptor signaling pathway [PATH:ko04621]|suppressor of G2 allele of SKP1	Organismal Systems|Environmental adaptation|Plant-pathogen interaction [PATH:ko04626]|suppressor of G2 allele of SKP1
Thraus_T5541	Probable NOT transcription complex subunit VIP2	VIP2_NICBE	49.032%	1.43e-39	NO_KO_DATA	NO_EC_NUMBER	NO_KO_DATA
Thraus_T4294	DCN1-like protein 2	DCNL2_MOUSE	38.618%	1e-49	K17822	NO_EC_NUMBER	Brite Hierarchies|Protein families: genetic information processing|Ubiquitin system [BR:ko04121]|DCN1-like protein 1/2
Thraus_T5451	Folate transporter 1, chloroplastic	FOLT1_ARATH	40.864%	5.12e-62	K15115	NO_EC_NUMBER	Brite Hierarchies|Protein families: signaling and cellular processes|Transporters [BR:ko02000]|solute carrier family 25 (mitochondrial folate transporter), member 32
Thraus_T5540	Phosphopantothenoylcysteine decarboxylase	HAL3A_ARATH	51.381%	3.42e-56	K01598	4.1.1.36	Metabolism|Metabolism of cofactors and vitamins|Pantothenate and CoA biosynthesis [PATH:ko00770]|phosphopantothenoylcysteine decarboxylase [EC:4.1.1.36]
Thraus_T2807	mRNA decapping complex subunit 2	DCP2_SCHPO	39.286%	3.82e-36	K12613	3.6.1.62	Genetic Information Processing|Folding, sorting and degradation|RNA degradation [PATH:ko03018]|mRNA-decapping enzyme subunit 2 [EC:3.6.1.62]	Brite Hierarchies|Protein families: genetic information processing|Messenger RNA biogenesis [BR:ko03019]|mRNA-decapping enzyme subunit 2 [EC:3.6.1.62]
Thraus_T2805	General transcription and DNA repair factor IIH subunit TFB5	TFB5_ARATH	35.714%	1.89e-07	K10845	NO_EC_NUMBER	Genetic Information Processing|Transcription|Basal transcription factors [PATH:ko03022]|TFIIH basal transcription factor complex TTD-A subunit	Genetic Information Processing|Replication and repair|Nucleotide excision repair [PATH:ko03420]|TFIIH basal transcription factor complex TTD-A subunit	Brite Hierarchies|Protein families: genetic information processing|Transcription machinery [BR:ko03021]|TFIIH basal transcription factor complex TTD-A subunit	Brite Hierarchies|Protein families: genetic information processing|DNA repair and recombination proteins [BR:ko03400]|TFIIH basal transcription factor complex TTD-A subunit
Thraus_T2804	Dihydropteroate synthase	DHPS_STRPQ	42.636%	1.51e-36	K00796	2.5.1.15	Metabolism|Metabolism of cofactors and vitamins|Folate biosynthesis [PATH:ko00790]|dihydropteroate synthase [EC:2.5.1.15]
Thraus_T2803	Tubulin alpha chain	TBA_CHLVU	78.886%	0	NO_KO_DATA	NO_EC_NUMBER	NO_KO_DATA
Thraus_T2802	5'-AMP-activated protein kinase subunit gamma-3	AAKG3_MOUSE	26.234%	5.93e-31	K07200	NO_EC_NUMBER	Environmental Information Processing|Signal transduction|Apelin signaling pathway [PATH:ko04371]|5'-AMP-activated protein kinase, regulatory gamma subunit	Environmental Information Processing|Signal transduction|FoxO signaling pathway [PATH:ko04068]|5'-AMP-activated protein kinase, regulatory gamma subunit	Environmental Information Processing|Signal transduction|AMPK signaling pathway [PATH:ko04152]|5'-AMP-activated protein kinase, regulatory gamma subunit	Cellular Processes|Cellular community - eukaryotes|Tight junction [PATH:ko04530]|5'-AMP-activated protein kinase, regulatory gamma subunit	Organismal Systems|Endocrine system|Insulin signaling pathway [PATH:ko04910]|5'-AMP-activated protein kinase, regulatory gamma subunit	Organismal Systems|Endocrine system|Glucagon signaling pathway [PATH:ko04922]|5'-AMP-activated protein kinase, regulatory gamma subunit	Organismal Systems|Endocrine system|Adipocytokine signaling pathway [PATH:ko04920]|5'-AMP-activated protein kinase, regulatory gamma subunit	Organismal Systems|Endocrine system|Oxytocin signaling pathway [PATH:ko04921]|5'-AMP-activated protein kinase, regulatory gamma subunit	Organismal Systems|Aging|Longevity regulating pathway [PATH:ko04211]|5'-AMP-activated protein kinase, regulatory gamma subunit	Organismal Systems|Aging|Longevity regulating pathway - multiple species [PATH:ko04213]|5'-AMP-activated protein kinase, regulatory gamma subunit	Organismal Systems|Environmental adaptation|Circadian rhythm [PATH:ko04710]|5'-AMP-activated protein kinase, regulatory gamma subunit	Organismal Systems|Environmental adaptation|Thermogenesis [PATH:ko04714]|5'-AMP-activated protein kinase, regulatory gamma subunit	Human Diseases|Cardiovascular disease|Hypertrophic cardiomyopathy (HCM) [PATH:ko05410]|5'-AMP-activated protein kinase, regulatory gamma subunit	Human Diseases|Endocrine and metabolic disease|Non-alcoholic fatty liver disease (NAFLD) [PATH:ko04932]|5'-AMP-activated protein kinase, regulatory gamma subunit	Human Diseases|Endocrine and metabolic disease|Insulin resistance [PATH:ko04931]|5'-AMP-activated protein kinase, regulatory gamma subunit
Thraus_T1358	Uroporphyrinogen decarboxylase	DCUP_DANRE	56.354%	1.77e-139	K01599	4.1.1.37	Metabolism|Metabolism of cofactors and vitamins|Porphyrin and chlorophyll metabolism [PATH:ko00860]|uroporphyrinogen decarboxylase [EC:4.1.1.37]
Thraus_T1359	Cyclin-B2-1	CCB21_ORYSJ	47.036%	8.18e-74	K21777	NO_EC_NUMBER	Brite Hierarchies|Protein families: genetic information processing|DNA replication proteins [BR:ko03032]|G2/mitotic-specific cyclin-B, other	Brite Hierarchies|Protein families: genetic information processing|Chromosome and associated proteins [BR:ko03036]|G2/mitotic-specific cyclin-B, other
Thraus_T1356	Imidazoleglycerol-phosphate dehydratase	HIS7_PHYPR	50.939%	7.92e-131	NO_KO_DATA	NO_EC_NUMBER	NO_KO_DATA
Thraus_T1357	Threonylcarbamoyladenosine tRNA methylthiotransferase	CDKAL_DROME	40.546%	2.43e-109	K15865	2.8.4.5	Brite Hierarchies|Protein families: genetic information processing|Transfer RNA biogenesis [BR:ko03016]|threonylcarbamoyladenosine tRNA methylthiotransferase CDKAL1 [EC:2.8.4.5]
Thraus_T1354	Palmitoyltransferase AKR1	AKR1_YARLI	38.235%	4.27e-08	K20032	2.3.1.225	Brite Hierarchies|Protein families: genetic information processing|Membrane trafficking [BR:ko04131]|palmitoyltransferase ZDHHC13/17 [EC:2.3.1.225]
Thraus_T2967	P2X receptor A	P2XA_DICDI	27.873%	1.24e-29	NO_KO_DATA	NO_EC_NUMBER	NO_KO_DATA
Thraus_T1352	Diacylglycerol O-acyltransferase 1	DGAT2_ASHGO	33.333%	5.69e-24	K14457	2.3.1.22	Metabolism|Lipid metabolism|Glycerolipid metabolism [PATH:ko00561]|2-acylglycerol O-acyltransferase 2 [EC:2.3.1.22]	Organismal Systems|Digestive system|Fat digestion and absorption [PATH:ko04975]|2-acylglycerol O-acyltransferase 2 [EC:2.3.1.22]
Thraus_T1353	MutS protein homolog 5	MSH5_MOUSE	27.66%	2.6e-42	K08741	NO_EC_NUMBER	Brite Hierarchies|Protein families: genetic information processing|DNA repair and recombination proteins [BR:ko03400]|DNA mismatch repair protein MSH5
Thraus_T1350	Alpha-ketoglutarate-dependent dioxygenase alkB	ALKB_DICDI	43.939%	1.69e-14	K10765	1.14.11.51|4.2.99.18|1.14.11.-	Not Included in Pathway or Brite|Unclassified: metabolism|Enzymes with EC numbers|alkylated DNA repair protein alkB homolog 1 [EC:1.14.11.51 4.2.99.18 1.14.11.-]
Thraus_T1351	Protein phosphatase 1B	PPM1B_BOVIN	40.959%	2.05e-65	K04461	3.1.3.16	Environmental Information Processing|Signal transduction|MAPK signaling pathway [PATH:ko04010]|protein phosphatase 1B [EC:3.1.3.16]	Environmental Information Processing|Signal transduction|MAPK signaling pathway - fly [PATH:ko04013]|protein phosphatase 1B [EC:3.1.3.16]	Brite Hierarchies|Protein families: metabolism|Protein phosphatases and associated proteins [BR:ko01009]|protein phosphatase 1B [EC:3.1.3.16]
Thraus_T4078	Serine/threonine-protein kinase/endoribonuclease IRE1a	IRE1A_ARATH	32.576%	3.01e-35	K08852	2.7.11.1|3.1.26.-	Genetic Information Processing|Folding, sorting and degradation|Protein processing in endoplasmic reticulum [PATH:ko04141]|serine/threonine-protein kinase/endoribonuclease IRE1 [EC:2.7.11.1 3.1.26.-]	Cellular Processes|Transport and catabolism|Autophagy - animal [PATH:ko04140]|serine/threonine-protein kinase/endoribonuclease IRE1 [EC:2.7.11.1 3.1.26.-]	Cellular Processes|Cell growth and death|Apoptosis [PATH:ko04210]|serine/threonine-protein kinase/endoribonuclease IRE1 [EC:2.7.11.1 3.1.26.-]	Human Diseases|Neurodegenerative disease|Alzheimer disease [PATH:ko05010]|serine/threonine-protein kinase/endoribonuclease IRE1 [EC:2.7.11.1 3.1.26.-]	Human Diseases|Endocrine and metabolic disease|Non-alcoholic fatty liver disease (NAFLD) [PATH:ko04932]|serine/threonine-protein kinase/endoribonuclease IRE1 [EC:2.7.11.1 3.1.26.-]	Brite Hierarchies|Protein families: metabolism|Protein kinases [BR:ko01001]|serine/threonine-protein kinase/endoribonuclease IRE1 [EC:2.7.11.1 3.1.26.-]
Thraus_T4113	Cytochrome c oxidase assembly protein COX15	COX15_ARATH	66.316%	3.25e-36	K02259	NO_EC_NUMBER	Metabolism|Energy metabolism|Oxidative phosphorylation [PATH:ko00190]|cytochrome c oxidase assembly protein subunit 15	Metabolism|Metabolism of cofactors and vitamins|Porphyrin and chlorophyll metabolism [PATH:ko00860]|cytochrome c oxidase assembly protein subunit 15	Environmental Information Processing|Signal transduction|Two-component system [PATH:ko02020]|cytochrome c oxidase assembly protein subunit 15	Organismal Systems|Environmental adaptation|Thermogenesis [PATH:ko04714]|cytochrome c oxidase assembly protein subunit 15	Brite Hierarchies|Protein families: genetic information processing|Mitochondrial biogenesis [BR:ko03029]|cytochrome c oxidase assembly protein subunit 15
Thraus_T5075	Histone deacetylase 1	HDAC1_CHICK	45.033%	4.67e-36	K06067	3.5.1.98	Environmental Information Processing|Signal transduction|Notch signaling pathway [PATH:ko04330]|histone deacetylase 1/2 [EC:3.5.1.98]	Cellular Processes|Cell growth and death|Cell cycle [PATH:ko04110]|histone deacetylase 1/2 [EC:3.5.1.98]	Organismal Systems|Endocrine system|Thyroid hormone signaling pathway [PATH:ko04919]|histone deacetylase 1/2 [EC:3.5.1.98]	Organismal Systems|Aging|Longevity regulating pathway - multiple species [PATH:ko04213]|histone deacetylase 1/2 [EC:3.5.1.98]	Human Diseases|Cancer: overview|Pathways in cancer [PATH:ko05200]|histone deacetylase 1/2 [EC:3.5.1.98]	Human Diseases|Cancer: overview|Transcriptional misregulation in cancer [PATH:ko05202]|histone deacetylase 1/2 [EC:3.5.1.98]	Human Diseases|Cancer: overview|MicroRNAs in cancer [PATH:ko05206]|histone deacetylase 1/2 [EC:3.5.1.98]	Human Diseases|Cancer: overview|Viral carcinogenesis [PATH:ko05203]|histone deacetylase 1/2 [EC:3.5.1.98]	Human Diseases|Cancer: specific types|Chronic myeloid leukemia [PATH:ko05220]|histone deacetylase 1/2 [EC:3.5.1.98]	Human Diseases|Neurodegenerative disease|Huntington disease [PATH:ko05016]|histone deacetylase 1/2 [EC:3.5.1.98]	Human Diseases|Substance dependence|Amphetamine addiction [PATH:ko05031]|histone deacetylase 1/2 [EC:3.5.1.98]	Human Diseases|Substance dependence|Alcoholism [PATH:ko05034]|histone deacetylase 1/2 [EC:3.5.1.98]	Human Diseases|Infectious disease: viral|Epstein-Barr virus infection [PATH:ko05169]|histone deacetylase 1/2 [EC:3.5.1.98]	Human Diseases|Infectious disease: viral|Human papillomavirus infection [PATH:ko05165]|histone deacetylase 1/2 [EC:3.5.1.98]	Brite Hierarchies|Protein families: genetic information processing|Chromosome and associated proteins [BR:ko03036]|histone deacetylase 1/2 [EC:3.5.1.98]
Thraus_T5074	Histone deacetylase 2	HDAC2_CHICK	52.632%	3.25e-37	NO_KO_DATA	NO_EC_NUMBER	NO_KO_DATA
Thraus_T5073	ATP synthase subunit 9, mitochondrial	ATP9_CHOCR	63.043%	2.47e-14	K02128	NO_EC_NUMBER	Metabolism|Energy metabolism|Oxidative phosphorylation [PATH:ko00190]|F-type H+-transporting ATPase subunit c	Organismal Systems|Environmental adaptation|Thermogenesis [PATH:ko04714]|F-type H+-transporting ATPase subunit c	Human Diseases|Neurodegenerative disease|Alzheimer disease [PATH:ko05010]|F-type H+-transporting ATPase subunit c	Human Diseases|Neurodegenerative disease|Parkinson disease [PATH:ko05012]|F-type H+-transporting ATPase subunit c	Human Diseases|Neurodegenerative disease|Huntington disease [PATH:ko05016]|F-type H+-transporting ATPase subunit c
Thraus_T5072	NADH-ubiquinone oxidoreductase chain 1	NU1M_CHOCR	58.958%	2.44e-115	K03878	7.1.1.2	Metabolism|Energy metabolism|Oxidative phosphorylation [PATH:ko00190]|NADH-ubiquinone oxidoreductase chain 1 [EC:7.1.1.2]	Organismal Systems|Nervous system|Retrograde endocannabinoid signaling [PATH:ko04723]|NADH-ubiquinone oxidoreductase chain 1 [EC:7.1.1.2]	Organismal Systems|Environmental adaptation|Thermogenesis [PATH:ko04714]|NADH-ubiquinone oxidoreductase chain 1 [EC:7.1.1.2]	Human Diseases|Neurodegenerative disease|Parkinson disease [PATH:ko05012]|NADH-ubiquinone oxidoreductase chain 1 [EC:7.1.1.2]	Brite Hierarchies|Protein families: genetic information processing|Mitochondrial biogenesis [BR:ko03029]|NADH-ubiquinone oxidoreductase chain 1 [EC:7.1.1.2]
Thraus_T5071	NADH-ubiquinone oxidoreductase chain 4	NU4M_MARPO	53.763%	3.15e-143	NO_KO_DATA	NO_EC_NUMBER	NO_KO_DATA
Thraus_T4112	Probable phospholipid-transporting ATPase IF	AT11B_HUMAN	36.111%	7.03e-20	K01530	7.6.2.1	Not Included in Pathway or Brite|Unclassified: metabolism|Enzymes with EC numbers|phospholipid-translocating ATPase [EC:7.6.2.1]
Thraus_T1590	Mitochondrial uncoupling protein 4	PUMP4_ARATH	42.336%	1.7e-56	K13577	NO_EC_NUMBER	Organismal Systems|Excretory system|Proximal tubule bicarbonate reclamation [PATH:ko04964]|solute carrier family 25 (mitochondrial dicarboxylate transporter), member 10	Brite Hierarchies|Protein families: signaling and cellular processes|Transporters [BR:ko02000]|solute carrier family 25 (mitochondrial dicarboxylate transporter), member 10
Thraus_T1591	Crooked neck-like protein 1	CRNL1_RAT	43.782%	9.46e-161	K12869	NO_EC_NUMBER	Genetic Information Processing|Transcription|Spliceosome [PATH:ko03040]|crooked neck	Brite Hierarchies|Protein families: genetic information processing|Spliceosome [BR:ko03041]|crooked neck	Brite Hierarchies|Protein families: genetic information processing|Chromosome and associated proteins [BR:ko03036]|crooked neck
Thraus_T1592	Long-chain-fatty-acid--CoA ligase	LCFB_BACSU	31.138%	3.63e-53	K01897	6.2.1.3	Metabolism|Lipid metabolism|Fatty acid biosynthesis [PATH:ko00061]|long-chain acyl-CoA synthetase [EC:6.2.1.3]	Metabolism|Lipid metabolism|Fatty acid degradation [PATH:ko00071]|long-chain acyl-CoA synthetase [EC:6.2.1.3]	Cellular Processes|Transport and catabolism|Peroxisome [PATH:ko04146]|long-chain acyl-CoA synthetase [EC:6.2.1.3]	Cellular Processes|Cell growth and death|Ferroptosis [PATH:ko04216]|long-chain acyl-CoA synthetase [EC:6.2.1.3]	Cellular Processes|Cellular community - prokaryotes|Quorum sensing [PATH:ko02024]|long-chain acyl-CoA synthetase [EC:6.2.1.3]	Organismal Systems|Endocrine system|Adipocytokine signaling pathway [PATH:ko04920]|long-chain acyl-CoA synthetase [EC:6.2.1.3]	Organismal Systems|Endocrine system|PPAR signaling pathway [PATH:ko03320]|long-chain acyl-CoA synthetase [EC:6.2.1.3]	Organismal Systems|Environmental adaptation|Thermogenesis [PATH:ko04714]|long-chain acyl-CoA synthetase [EC:6.2.1.3]	Brite Hierarchies|Protein families: metabolism|Lipid biosynthesis proteins [BR:ko01004]|long-chain acyl-CoA synthetase [EC:6.2.1.3]	Brite Hierarchies|Protein families: signaling and cellular processes|Exosome [BR:ko04147]|long-chain acyl-CoA synthetase [EC:6.2.1.3]
Thraus_T1593	Amino-acid acetyltransferase {ECO:0000255|HAMAP-Rule:MF_01105}	ARGA_AZOVD	41.244%	1.39e-97	K14682	2.3.1.1	Metabolism|Amino acid metabolism|Arginine biosynthesis [PATH:ko00220]|amino-acid N-acetyltransferase [EC:2.3.1.1]
Thraus_T1594	Protein aardvark	AARA_DICDI	35.088%	7.3e-36	NO_KO_DATA	NO_EC_NUMBER	NO_KO_DATA
Thraus_T1595	tRNA pseudouridine synthase B {ECO:0000255|HAMAP-Rule:MF_01080}	TRUB_CAUSK	43.781%	2.58e-43	K03177	5.4.99.25	Brite Hierarchies|Protein families: genetic information processing|Transfer RNA biogenesis [BR:ko03016]|tRNA pseudouridine55 synthase [EC:5.4.99.25]
Thraus_T4076	Probable serine/threonine-protein kinase WNK1	WNK1_ORYSJ	44.211%	1.74e-20	K08867	2.7.11.1	Brite Hierarchies|Protein families: metabolism|Protein kinases [BR:ko01001]|WNK lysine deficient protein kinase [EC:2.7.11.1]	Brite Hierarchies|Protein families: metabolism|Protein phosphatases and associated proteins [BR:ko01009]|WNK lysine deficient protein kinase [EC:2.7.11.1]
Thraus_T4077	RING-box protein 1	RBX1_DICDI	81.818%	8.02e-34	K03868	2.3.2.32	Genetic Information Processing|Folding, sorting and degradation|Protein processing in endoplasmic reticulum [PATH:ko04141]|RING-box protein 1 [EC:2.3.2.32]	Genetic Information Processing|Folding, sorting and degradation|Ubiquitin mediated proteolysis [PATH:ko04120]|RING-box protein 1 [EC:2.3.2.32]	Genetic Information Processing|Replication and repair|Nucleotide excision repair [PATH:ko03420]|RING-box protein 1 [EC:2.3.2.32]	Environmental Information Processing|Signal transduction|Wnt signaling pathway [PATH:ko04310]|RING-box protein 1 [EC:2.3.2.32]	Environmental Information Processing|Signal transduction|Hedgehog signaling pathway - fly [PATH:ko04341]|RING-box protein 1 [EC:2.3.2.32]	Environmental Information Processing|Signal transduction|TGF-beta signaling pathway [PATH:ko04350]|RING-box protein 1 [EC:2.3.2.32]	Environmental Information Processing|Signal transduction|HIF-1 signaling pathway [PATH:ko04066]|RING-box protein 1 [EC:2.3.2.32]	Cellular Processes|Cell growth and death|Cell cycle [PATH:ko04110]|RING-box protein 1 [EC:2.3.2.32]	Cellular Processes|Cell growth and death|Cell cycle - yeast [PATH:ko04111]|RING-box protein 1 [EC:2.3.2.32]	Cellular Processes|Cell growth and death|Oocyte meiosis [PATH:ko04114]|RING-box protein 1 [EC:2.3.2.32]	Organismal Systems|Environmental adaptation|Circadian rhythm [PATH:ko04710]|RING-box protein 1 [EC:2.3.2.32]	Human Diseases|Cancer: overview|Pathways in cancer [PATH:ko05200]|RING-box protein 1 [EC:2.3.2.32]	Human Diseases|Cancer: specific types|Renal cell carcinoma [PATH:ko05211]|RING-box protein 1 [EC:2.3.2.32]	Human Diseases|Infectious disease: bacterial|Shigellosis [PATH:ko05131]|RING-box protein 1 [EC:2.3.2.32]	Human Diseases|Infectious disease: viral|Human immunodeficiency virus 1 infection [PATH:ko05170]|RING-box protein 1 [EC:2.3.2.32]	Brite Hierarchies|Protein families: genetic information processing|Ubiquitin system [BR:ko04121]|RING-box protein 1 [EC:2.3.2.32]	Brite Hierarchies|Protein families: genetic information processing|DNA repair and recombination proteins [BR:ko03400]|RING-box protein 1 [EC:2.3.2.32]
Thraus_T3140	Protein NLRC3	NLRC3_MOUSE	30.417%	5.73e-13	NO_KO_DATA	NO_EC_NUMBER	NO_KO_DATA
Thraus_T4110	Tetratricopeptide repeat protein 21B {ECO:0000305}	TT21B_HUMAN	30.126%	9.78e-107	K19673	NO_EC_NUMBER	Brite Hierarchies|Protein families: genetic information processing|Chromosome and associated proteins [BR:ko03036]|tetratricopeptide repeat protein 21B
Thraus_T3454	Calcium/calmodulin-dependent protein kinase type 1 {ECO:0000305}	CAMKI_MACNP	40.333%	1.43e-66	NO_KO_DATA	NO_EC_NUMBER	NO_KO_DATA
Thraus_T1437	30S ribosomal protein S18, chloroplastic	RR18_GUITH	53.061%	7.52e-11	NO_KO_DATA	NO_EC_NUMBER	NO_KO_DATA
Thraus_T1436	Tyrosine-protein phosphatase DSP1 {ECO:0000305}	DSP1_ARATH	52.174%	9.3e-52	K18045	3.1.3.48	Brite Hierarchies|Protein families: metabolism|Protein phosphatases and associated proteins [BR:ko01009]|tyrosine-protein phosphatase SIW14 [EC:3.1.3.48]
Thraus_T1576	Splicing factor 3A subunit 2	SF3A2_DICDI	50.27%	4.21e-63	K12826	NO_EC_NUMBER	Genetic Information Processing|Transcription|Spliceosome [PATH:ko03040]|splicing factor 3A subunit 2	Brite Hierarchies|Protein families: genetic information processing|Spliceosome [BR:ko03041]|splicing factor 3A subunit 2
Thraus_T1577	Acyl-lipid (7-3)-desaturase {ECO:0000305}	D4FAD_THRSP	79.245%	6.03e-22	NO_KO_DATA	NO_EC_NUMBER	NO_KO_DATA
Thraus_T1574	Peptidyl-prolyl cis-trans isomerase	PPIA_BLAGE	52.308%	5.32e-20	NO_KO_DATA	NO_EC_NUMBER	NO_KO_DATA
Thraus_T1575	Cysteine and histidine-rich domain-containing protein 1	CHRD1_XENLA	43.284%	3.67e-11	K16729	NO_EC_NUMBER	Brite Hierarchies|Protein families: genetic information processing|Chaperones and folding catalysts [BR:ko03110]|cysteine and histidine-rich domain-containing protein 1	Brite Hierarchies|Protein families: genetic information processing|Chromosome and associated proteins [BR:ko03036]|cysteine and histidine-rich domain-containing protein 1
Thraus_T1572	50S ribosomal protein L27 {ECO:0000255|HAMAP-Rule:MF_00539}	RL27_GLUDA	67.606%	8.49e-25	K02899	NO_EC_NUMBER	Genetic Information Processing|Translation|Ribosome [PATH:ko03010]|large subunit ribosomal protein L27	Brite Hierarchies|Protein families: genetic information processing|Ribosome [BR:ko03011]|large subunit ribosomal protein L27
Thraus_T1435	Nucleoside diphosphate-linked moiety X motif 17	NUD17_DANRE	36.19%	6.65e-17	NO_KO_DATA	NO_EC_NUMBER	NO_KO_DATA
Thraus_T3262	60S acidic ribosomal protein P2	RLA2_PODAS	55.556%	2.45e-12	NO_KO_DATA	NO_EC_NUMBER	NO_KO_DATA
Thraus_T1571	Importin subunit alpha-B	IMAB_DICDI	39.266%	1.31e-66	K15042	NO_EC_NUMBER	Human Diseases|Infectious disease: viral|Influenza A [PATH:ko05164]|importin subunit alpha-5/6/7	Brite Hierarchies|Protein families: genetic information processing|Chromosome and associated proteins [BR:ko03036]|importin subunit alpha-5/6/7
Thraus_T1434	Probable protein phosphatase 2C 55	P2C55_ORYSJ	38.824%	1.15e-43	K17506	3.1.3.16	Brite Hierarchies|Protein families: metabolism|Protein phosphatases and associated proteins [BR:ko01009]|protein phosphatase 1L [EC:3.1.3.16]
Thraus_T3268	Carnitine O-palmitoyltransferase 1, liver isoform	CPT1A_RAT	42.444%	6.69e-175	K08765	2.3.1.21	Metabolism|Lipid metabolism|Fatty acid degradation [PATH:ko00071]|carnitine O-palmitoyltransferase 1, liver isoform [EC:2.3.1.21]	Environmental Information Processing|Signal transduction|AMPK signaling pathway [PATH:ko04152]|carnitine O-palmitoyltransferase 1, liver isoform [EC:2.3.1.21]	Organismal Systems|Endocrine system|Glucagon signaling pathway [PATH:ko04922]|carnitine O-palmitoyltransferase 1, liver isoform [EC:2.3.1.21]	Organismal Systems|Endocrine system|Adipocytokine signaling pathway [PATH:ko04920]|carnitine O-palmitoyltransferase 1, liver isoform [EC:2.3.1.21]	Organismal Systems|Endocrine system|PPAR signaling pathway [PATH:ko03320]|carnitine O-palmitoyltransferase 1, liver isoform [EC:2.3.1.21]	Organismal Systems|Environmental adaptation|Thermogenesis [PATH:ko04714]|carnitine O-palmitoyltransferase 1, liver isoform [EC:2.3.1.21]	Human Diseases|Endocrine and metabolic disease|Insulin resistance [PATH:ko04931]|carnitine O-palmitoyltransferase 1, liver isoform [EC:2.3.1.21]	Brite Hierarchies|Protein families: genetic information processing|Mitochondrial biogenesis [BR:ko03029]|carnitine O-palmitoyltransferase 1, liver isoform [EC:2.3.1.21]
Thraus_T3269	Choline transporter-like protein 4	CTL4_XENLA	34.359%	2.14e-65	K15377	NO_EC_NUMBER	Human Diseases|Cancer: overview|Choline metabolism in cancer [PATH:ko05231]|solute carrier family 44 (choline transporter-like protein), member 2/4/5	Brite Hierarchies|Protein families: signaling and cellular processes|Transporters [BR:ko02000]|solute carrier family 44 (choline transporter-like protein), member 2/4/5	Brite Hierarchies|Protein families: signaling and cellular processes|Exosome [BR:ko04147]|solute carrier family 44 (choline transporter-like protein), member 2/4/5
Thraus_T1578	Serine/threonine-protein kinase Nek2	NEK2_HUMAN	53.903%	8.76e-97	K20872	2.7.11.1	Brite Hierarchies|Protein families: metabolism|Protein kinases [BR:ko01001]|NIMA (never in mitosis gene a)-related kinase 2 [EC:2.7.11.1]	Brite Hierarchies|Protein families: metabolism|Protein phosphatases and associated proteins [BR:ko01009]|NIMA (never in mitosis gene a)-related kinase 2 [EC:2.7.11.1]	Brite Hierarchies|Protein families: genetic information processing|Chromosome and associated proteins [BR:ko03036]|NIMA (never in mitosis gene a)-related kinase 2 [EC:2.7.11.1]
Thraus_T1579	Transmembrane protein 145	TM145_MOUSE	32.198%	1.98e-39	NO_KO_DATA	NO_EC_NUMBER	NO_KO_DATA
Thraus_T4500	Uncharacterized protein HI_0077	Y077_HAEIN	31.724%	8.44e-11	NO_KO_DATA	NO_EC_NUMBER	NO_KO_DATA
Thraus_T1178	Probable WRKY transcription factor 19	WRK19_ARATH	44.086%	5.74e-18	NO_KO_DATA	NO_EC_NUMBER	NO_KO_DATA
Thraus_T1179	Bifunctional arginine demethylase and lysyl-hydroxylase JMJD6	JMJD6_DANRE	42.763%	2.49e-80	K11323	1.14.11.-	Brite Hierarchies|Protein families: genetic information processing|Chromosome and associated proteins [BR:ko03036]|histone arginine demethylase JMJD6 [EC:1.14.11.-]
Thraus_T4053	DNA replication ATP-dependent helicase/nuclease DNA2	DNA2_BOVIN	50.649%	1.75e-15	NO_KO_DATA	NO_EC_NUMBER	NO_KO_DATA
Thraus_T1172	Caltractin ICL1b	CATR2_PARTE	65.354%	1.15e-44	NO_KO_DATA	NO_EC_NUMBER	NO_KO_DATA
Thraus_T1173	Enkurin	ENKUR_MOUSE	30%	5.17e-16	NO_KO_DATA	NO_EC_NUMBER	NO_KO_DATA
Thraus_T1171	Glutamate synthase 1 [NADH], chloroplastic	GLT1_ORYSJ	56.338%	8.21e-163	K00264	1.4.1.14	Metabolism|Energy metabolism|Nitrogen metabolism [PATH:ko00910]|glutamate synthase (NADH) [EC:1.4.1.14]	Metabolism|Amino acid metabolism|Alanine, aspartate and glutamate metabolism [PATH:ko00250]|glutamate synthase (NADH) [EC:1.4.1.14]
Thraus_T4416	Probable serine/threonine-protein kinase DDB_G0280461	Y9865_DICDI	35.484%	1.13e-45	NO_KO_DATA	NO_EC_NUMBER	NO_KO_DATA
Thraus_T1177	Phosphoglycolate phosphatase 2	PGP2_ARATH	33.103%	3.05e-45	K19269	3.1.3.18|3.1.3.48	Metabolism|Carbohydrate metabolism|Glyoxylate and dicarboxylate metabolism [PATH:ko00630]|phosphoglycolate phosphatase [EC:3.1.3.18 3.1.3.48]	Brite Hierarchies|Protein families: metabolism|Protein phosphatases and associated proteins [BR:ko01009]|phosphoglycolate phosphatase [EC:3.1.3.18 3.1.3.48]
Thraus_T4414	Uncharacterized helicase C694.02	YIW2_SCHPO	27.669%	1.32e-40	K20103	3.6.4.13	Brite Hierarchies|Protein families: genetic information processing|Messenger RNA biogenesis [BR:ko03019]|ATP-dependent RNA helicase DDX60 [EC:3.6.4.13]
Thraus_T1175	40S ribosomal protein S18	RS18_BRABE	69.388%	3.62e-76	NO_KO_DATA	NO_EC_NUMBER	NO_KO_DATA
Thraus_T1684	Isopentenyl-diphosphate Delta-isomerase 1	IDI1_BOVIN	53.991%	1.76e-76	K01823	5.3.3.2	Metabolism|Metabolism of terpenoids and polyketides|Terpenoid backbone biosynthesis [PATH:ko00900]|isopentenyl-diphosphate Delta-isomerase [EC:5.3.3.2]
Thraus_T1685	Trimeric intracellular cation channel type 1B.1 {ECO:0000305}	T38B1_CAEEL	25.472%	7.39e-06	K24013	NO_EC_NUMBER
Thraus_T1686	Anoctamin-10	ANO10_MOUSE	31.557%	1e-49	K19327	NO_EC_NUMBER	Brite Hierarchies|Protein families: signaling and cellular processes|Ion channels [BR:ko04040]|anoctamin-10
Thraus_T1687	Acyl-CoA dehydrogenase family member 11	ACD11_RAT	40.86%	7.51e-54	K11730	NO_EC_NUMBER	Not Included in Pathway or Brite|Unclassified: metabolism|Lipid metabolism|acyl-CoA dehydrogenase family member 11
Thraus_T1680	WD40 repeat-containing protein HOS15 {ECO:0000305}	HOS15_ARATH	48.248%	2.32e-106	K04508	NO_EC_NUMBER	Environmental Information Processing|Signal transduction|MAPK signaling pathway - fly [PATH:ko04013]|transducin (beta)-like 1	Environmental Information Processing|Signal transduction|Wnt signaling pathway [PATH:ko04310]|transducin (beta)-like 1
Thraus_T1681	Meiotic nuclear division protein 1 homolog	MND1_HUMAN	41.892%	6.91e-17	NO_KO_DATA	NO_EC_NUMBER	NO_KO_DATA
Thraus_T38	Arylsulfatase	ARS_HEMPU	27.67%	3.95e-22	NO_KO_DATA	NO_EC_NUMBER	NO_KO_DATA
Thraus_T39	Tubulin alpha chain	TBA_CHLVU	78.886%	0	NO_KO_DATA	NO_EC_NUMBER	NO_KO_DATA
Thraus_T36	Phospholipase D zeta 1 {ECO:0000303|PubMed:11891260}	PLDZ1_ARATH	46.617%	2.04e-29	K01115	3.1.4.4	Metabolism|Lipid metabolism|Glycerophospholipid metabolism [PATH:ko00564]|phospholipase D1/2 [EC:3.1.4.4]	Metabolism|Lipid metabolism|Ether lipid metabolism [PATH:ko00565]|phospholipase D1/2 [EC:3.1.4.4]	Environmental Information Processing|Signal transduction|Ras signaling pathway [PATH:ko04014]|phospholipase D1/2 [EC:3.1.4.4]	Environmental Information Processing|Signal transduction|Phospholipase D signaling pathway [PATH:ko04072]|phospholipase D1/2 [EC:3.1.4.4]	Environmental Information Processing|Signal transduction|Sphingolipid signaling pathway [PATH:ko04071]|phospholipase D1/2 [EC:3.1.4.4]	Environmental Information Processing|Signal transduction|cAMP signaling pathway [PATH:ko04024]|phospholipase D1/2 [EC:3.1.4.4]	Cellular Processes|Transport and catabolism|Endocytosis [PATH:ko04144]|phospholipase D1/2 [EC:3.1.4.4]	Organismal Systems|Immune system|Fc gamma R-mediated phagocytosis [PATH:ko04666]|phospholipase D1/2 [EC:3.1.4.4]	Organismal Systems|Endocrine system|GnRH signaling pathway [PATH:ko04912]|phospholipase D1/2 [EC:3.1.4.4]	Organismal Systems|Endocrine system|Parathyroid hormone synthesis, secretion and action [PATH:ko04928]|phospholipase D1/2 [EC:3.1.4.4]	Organismal Systems|Nervous system|Glutamatergic synapse [PATH:ko04724]|phospholipase D1/2 [EC:3.1.4.4]	Human Diseases|Cancer: overview|Pathways in cancer [PATH:ko05200]|phospholipase D1/2 [EC:3.1.4.4]	Human Diseases|Cancer: overview|Choline metabolism in cancer [PATH:ko05231]|phospholipase D1/2 [EC:3.1.4.4]	Human Diseases|Cancer: specific types|Pancreatic cancer [PATH:ko05212]|phospholipase D1/2 [EC:3.1.4.4]	Brite Hierarchies|Protein families: genetic information processing|Membrane trafficking [BR:ko04131]|phospholipase D1/2 [EC:3.1.4.4]
Thraus_T37	Extracellular serine proteinase	SEPR_THESR	50.323%	8.24e-57	NO_KO_DATA	NO_EC_NUMBER	NO_KO_DATA
Thraus_T35	Ran-specific GTPase-activating protein 1	YRB1_YEAST	52.817%	5.57e-43	K15306	NO_EC_NUMBER	Human Diseases|Cancer: overview|Viral carcinogenesis [PATH:ko05203]|Ran-binding protein 1	Human Diseases|Infectious disease: viral|Human T-cell leukemia virus 1 infection [PATH:ko05166]|Ran-binding protein 1
Thraus_T1688	Uncharacterized protein MG039	Y039_MYCGE	30.612%	1.14e-40	K00111	1.1.5.3	Metabolism|Lipid metabolism|Glycerophospholipid metabolism [PATH:ko00564]|glycerol-3-phosphate dehydrogenase [EC:1.1.5.3]
Thraus_T33	Tensin	TENS_CHICK	31.23%	2.77e-32	K18080	NO_EC_NUMBER	Brite Hierarchies|Protein families: metabolism|Protein phosphatases and associated proteins [BR:ko01009]|tensin
Thraus_T30	Quinone oxidoreductase-like protein 2 homolog	QORL2_NEMVE	41.472%	1.99e-54	NO_KO_DATA	NO_EC_NUMBER	NO_KO_DATA
Thraus_T31	G1/S-specific cyclin-D2	CCND2_BOVIN	30.256%	3.76e-14	K10151	NO_EC_NUMBER	Environmental Information Processing|Signal transduction|Wnt signaling pathway [PATH:ko04310]|G1/S-specific cyclin-D2	Environmental Information Processing|Signal transduction|Hedgehog signaling pathway [PATH:ko04340]|G1/S-specific cyclin-D2	Environmental Information Processing|Signal transduction|Hippo signaling pathway [PATH:ko04390]|G1/S-specific cyclin-D2	Environmental Information Processing|Signal transduction|Jak-STAT signaling pathway [PATH:ko04630]|G1/S-specific cyclin-D2	Environmental Information Processing|Signal transduction|FoxO signaling pathway [PATH:ko04068]|G1/S-specific cyclin-D2	Environmental Information Processing|Signal transduction|PI3K-Akt signaling pathway [PATH:ko04151]|G1/S-specific cyclin-D2	Cellular Processes|Cell growth and death|Cell cycle [PATH:ko04110]|G1/S-specific cyclin-D2	Cellular Processes|Cell growth and death|p53 signaling pathway [PATH:ko04115]|G1/S-specific cyclin-D2	Cellular Processes|Cell growth and death|Cellular senescence [PATH:ko04218]|G1/S-specific cyclin-D2	Cellular Processes|Cellular community - eukaryotes|Focal adhesion [PATH:ko04510]|G1/S-specific cyclin-D2	Organismal Systems|Endocrine system|Prolactin signaling pathway [PATH:ko04917]|G1/S-specific cyclin-D2	Human Diseases|Cancer: overview|Pathways in cancer [PATH:ko05200]|G1/S-specific cyclin-D2	Human Diseases|Cancer: overview|Transcriptional misregulation in cancer [PATH:ko05202]|G1/S-specific cyclin-D2	Human Diseases|Cancer: overview|MicroRNAs in cancer [PATH:ko05206]|G1/S-specific cyclin-D2	Human Diseases|Cancer: overview|Viral carcinogenesis [PATH:ko05203]|G1/S-specific cyclin-D2	Human Diseases|Infectious disease: viral|Human T-cell leukemia virus 1 infection [PATH:ko05166]|G1/S-specific cyclin-D2	Human Diseases|Infectious disease: viral|Measles [PATH:ko05162]|G1/S-specific cyclin-D2	Human Diseases|Infectious disease: viral|Epstein-Barr virus infection [PATH:ko05169]|G1/S-specific cyclin-D2	Human Diseases|Infectious disease: viral|Human papillomavirus infection [PATH:ko05165]|G1/S-specific cyclin-D2
Thraus_T4054	cGMP-dependent 3',5'-cGMP phosphodiesterase A	PDE5_DICDI	34.322%	6.61e-88	NO_KO_DATA	NO_EC_NUMBER	NO_KO_DATA
Thraus_T5630	Inositol polyphosphate 5-phosphatase OCRL {ECO:0000305}	OCRL_RAT	34.394%	1.27e-86	NO_KO_DATA	NO_EC_NUMBER	NO_KO_DATA
Thraus_T3562	DnaJ homolog subfamily C member 21	DJC21_DANRE	48.899%	1.51e-62	K09506	NO_EC_NUMBER	Brite Hierarchies|Protein families: genetic information processing|Ribosome biogenesis [BR:ko03009]|DnaJ homolog subfamily A member 5	Brite Hierarchies|Protein families: genetic information processing|Chaperones and folding catalysts [BR:ko03110]|DnaJ homolog subfamily A member 5
Thraus_T4055	Inositol-3-phosphate synthase	INO1_TOBAC	63.189%	0	K01858	5.5.1.4	Metabolism|Carbohydrate metabolism|Inositol phosphate metabolism [PATH:ko00562]|myo-inositol-1-phosphate synthase [EC:5.5.1.4]	Metabolism|Biosynthesis of other secondary metabolites|Streptomycin biosynthesis [PATH:ko00521]|myo-inositol-1-phosphate synthase [EC:5.5.1.4]
Thraus_T4547	GDT1-like protein 3	GDT13_ORYSJ	55.072%	1.16e-65	K23541	NO_EC_NUMBER	Brite Hierarchies|Protein families: genetic information processing|Membrane trafficking [BR:ko04131]|Ca2+/H+ antiporter, TMEM165/GDT1 family	Brite Hierarchies|Protein families: signaling and cellular processes|Transporters [BR:ko02000]|Ca2+/H+ antiporter, TMEM165/GDT1 family
Thraus_T3192	116 kDa U5 small nuclear ribonucleoprotein component	U5S1_CHICK	48.453%	0	K12852	NO_EC_NUMBER	Genetic Information Processing|Transcription|Spliceosome [PATH:ko03040]|116 kDa U5 small nuclear ribonucleoprotein component	Brite Hierarchies|Protein families: genetic information processing|Spliceosome [BR:ko03041]|116 kDa U5 small nuclear ribonucleoprotein component
Thraus_T3193	Peroxisomal biogenesis factor 6	PEX6_PICAN	39.794%	3.49e-125	NO_KO_DATA	NO_EC_NUMBER	NO_KO_DATA
Thraus_T3190	Putative 12-oxophytodienoate reductase 11	OPR11_ORYSJ	32.143%	3.81e-49	NO_KO_DATA	NO_EC_NUMBER	NO_KO_DATA
Thraus_T3191	40S ribosomal protein S15	RS15_PICMA	67.391%	1.94e-63	NO_KO_DATA	NO_EC_NUMBER	NO_KO_DATA
Thraus_T3196	Short-chain-enoyl-CoA hydratase {ECO:0000305}	CRT_CLOAB	42.197%	1.06e-25	K01715	4.2.1.17	Metabolism|Carbohydrate metabolism|Butanoate metabolism [PATH:ko00650]|enoyl-CoA hydratase [EC:4.2.1.17]
Thraus_T3194	DNA primase large subunit	PRI2_RAT	36.508%	1.03e-91	NO_KO_DATA	NO_EC_NUMBER	NO_KO_DATA
Thraus_T3195	Protein kinase 2	PK2_DICDI	43.36%	5.76e-87	K13303	2.7.11.1	Environmental Information Processing|Signal transduction|FoxO signaling pathway [PATH:ko04068]|serum/glucocorticoid-regulated kinase 2 [EC:2.7.11.1]	Environmental Information Processing|Signal transduction|PI3K-Akt signaling pathway [PATH:ko04151]|serum/glucocorticoid-regulated kinase 2 [EC:2.7.11.1]	Brite Hierarchies|Protein families: metabolism|Protein kinases [BR:ko01001]|serum/glucocorticoid-regulated kinase 2 [EC:2.7.11.1]
Thraus_T4201	Adenylate kinase 4	KAD4_ARATH	56.774%	1.19e-58	K00939	2.7.4.3	Metabolism|Nucleotide metabolism|Purine metabolism [PATH:ko00230]|adenylate kinase [EC:2.7.4.3]	Metabolism|Metabolism of cofactors and vitamins|Thiamine metabolism [PATH:ko00730]|adenylate kinase [EC:2.7.4.3]	Brite Hierarchies|Protein families: signaling and cellular processes|Exosome [BR:ko04147]|adenylate kinase [EC:2.7.4.3]
Thraus_T3949	Glutamine synthetase cytosolic isozyme	GLNA1_DAUCA	63.235%	3.1e-151	NO_KO_DATA	NO_EC_NUMBER	NO_KO_DATA
Thraus_T3198	Tubulin alpha chain	TBA_CHLVU	78.229%	2.67e-134	NO_KO_DATA	NO_EC_NUMBER	NO_KO_DATA
Thraus_T3199	Methyltransferase N6AMT1 {ECO:0000305}	N6MT1_HUMAN	36.058%	2.53e-22	K19589	2.1.1.297	Brite Hierarchies|Protein families: genetic information processing|Translation factors [BR:ko03012]|release factor glutamine methyltransferase [EC:2.1.1.297]
Thraus_T4892	Kinesin-like protein KIN-14E {ECO:0000305}	KN14E_ARATH	51.811%	2.83e-105	NO_KO_DATA	NO_EC_NUMBER	NO_KO_DATA
Thraus_T3948	Zinc finger protein 143	ZN143_MOUSE	39.259%	4.53e-19	K20828	NO_EC_NUMBER	Brite Hierarchies|Protein families: genetic information processing|Transcription machinery [BR:ko03021]|zinc finger protein 143/76
Thraus_T1770	Dihydrolipoyl dehydrogenase, mitochondrial	DLDH_PEA	58.65%	0	NO_KO_DATA	NO_EC_NUMBER	NO_KO_DATA
Thraus_T1771	Queuine tRNA-ribosyltransferase catalytic subunit 1 {ECO:0000255|HAMAP-Rule:MF_03218}	TGT_XENTR	50.928%	2e-120	K00773	2.4.2.29	Brite Hierarchies|Protein families: genetic information processing|Transfer RNA biogenesis [BR:ko03016]|queuine tRNA-ribosyltransferase [EC:2.4.2.29]
Thraus_T1772	Patatin-like phospholipase domain-containing protein NFIA_019760	PLPL_NEOFI	44.167%	9.28e-90	NO_KO_DATA	NO_EC_NUMBER	NO_KO_DATA
Thraus_T1773	Tubby-related protein 3 {ECO:0000305}	TULP3_HUMAN	43.836%	9.46e-12	NO_KO_DATA	NO_EC_NUMBER	NO_KO_DATA
Thraus_T1774	DnaJ homolog subfamily B member 6	DNJB6_CHICK	53.211%	7.04e-28	K09512	NO_EC_NUMBER	Brite Hierarchies|Protein families: genetic information processing|Chaperones and folding catalysts [BR:ko03110]|DnaJ homolog subfamily B member 6
Thraus_T1775	CCR4-NOT transcription complex subunit 9 {ECO:0000250|UniProtKB:Q92600}	CNOT9_PONAB	70.817%	5.22e-128	K12606	NO_EC_NUMBER	Genetic Information Processing|Folding, sorting and degradation|RNA degradation [PATH:ko03018]|CCR4-NOT transcription complex subunit 9	Brite Hierarchies|Protein families: genetic information processing|Messenger RNA biogenesis [BR:ko03019]|CCR4-NOT transcription complex subunit 9
Thraus_T1777	Calmodulin	CALM_EMENI	30.935%	1.78e-12	K02183	NO_EC_NUMBER	Environmental Information Processing|Signal transduction|Ras signaling pathway [PATH:ko04014]|calmodulin	Environmental Information Processing|Signal transduction|Rap1 signaling pathway [PATH:ko04015]|calmodulin	Environmental Information Processing|Signal transduction|MAPK signaling pathway - plant [PATH:ko04016]|calmodulin	Environmental Information Processing|Signal transduction|Apelin signaling pathway [PATH:ko04371]|calmodulin	Environmental Information Processing|Signal transduction|Calcium signaling pathway [PATH:ko04020]|calmodulin	Environmental Information Processing|Signal transduction|Phosphatidylinositol signaling system [PATH:ko04070]|calmodulin	Environmental Information Processing|Signal transduction|cAMP signaling pathway [PATH:ko04024]|calmodulin	Environmental Information Processing|Signal transduction|cGMP-PKG signaling pathway [PATH:ko04022]|calmodulin	Cellular Processes|Cell growth and death|Oocyte meiosis [PATH:ko04114]|calmodulin	Cellular Processes|Cell growth and death|Cellular senescence [PATH:ko04218]|calmodulin	Organismal Systems|Immune system|C-type lectin receptor signaling pathway [PATH:ko04625]|calmodulin	Organismal Systems|Endocrine system|Insulin signaling pathway [PATH:ko04910]|calmodulin	Organismal Systems|Endocrine system|Glucagon signaling pathway [PATH:ko04922]|calmodulin	Organismal Systems|Endocrine system|GnRH signaling pathway [PATH:ko04912]|calmodulin	Organismal Systems|Endocrine system|Estrogen signaling pathway [PATH:ko04915]|calmodulin	Organismal Systems|Endocrine system|Oxytocin signaling pathway [PATH:ko04921]|calmodulin	Organismal Systems|Endocrine system|Melanogenesis [PATH:ko04916]|calmodulin	Organismal Systems|Endocrine system|Renin secretion [PATH:ko04924]|calmodulin	Organismal Systems|Endocrine system|Aldosterone synthesis and secretion [PATH:ko04925]|calmodulin	Organismal Systems|Circulatory system|Adrenergic signaling in cardiomyocytes [PATH:ko04261]|calmodulin	Organismal Systems|Circulatory system|Vascular smooth muscle contraction [PATH:ko04270]|calmodulin	Organismal Systems|Digestive system|Salivary secretion [PATH:ko04970]|calmodulin	Organismal Systems|Digestive system|Gastric acid secretion [PATH:ko04971]|calmodulin	Organismal Systems|Nervous system|Dopaminergic synapse [PATH:ko04728]|calmodulin	Organismal Systems|Nervous system|Long-term potentiation [PATH:ko04720]|calmodulin	Organismal Systems|Nervous system|Neurotrophin signaling pathway [PATH:ko04722]|calmodulin	Organismal Systems|Sensory system|Phototransduction [PATH:ko04744]|calmodulin	Organismal Systems|Sensory system|Phototransduction - fly [PATH:ko04745]|calmodulin	Organismal Systems|Sensory system|Olfactory transduction [PATH:ko04740]|calmodulin	Organismal Systems|Sensory system|Inflammatory mediator regulation of TRP channels [PATH:ko04750]|calmodulin	Organismal Systems|Environmental adaptation|Circadian entrainment [PATH:ko04713]|calmodulin	Organismal Systems|Environmental adaptation|Plant-pathogen interaction [PATH:ko04626]|calmodulin	Human Diseases|Cancer: overview|Pathways in cancer [PATH:ko05200]|calmodulin	Human Diseases|Cancer: specific types|Glioma [PATH:ko05214]|calmodulin	Human Diseases|Neurodegenerative disease|Alzheimer disease [PATH:ko05010]|calmodulin	Human Diseases|Substance dependence|Amphetamine addiction [PATH:ko05031]|calmodulin	Human Diseases|Substance dependence|Alcoholism [PATH:ko05034]|calmodulin	Human Diseases|Cardiovascular disease|Fluid shear stress and atherosclerosis [PATH:ko05418]|calmodulin	Human Diseases|Infectious disease: bacterial|Pertussis [PATH:ko05133]|calmodulin	Human Diseases|Infectious disease: bacterial|Tuberculosis [PATH:ko05152]|calmodulin	Human Diseases|Infectious disease: viral|Human immunodeficiency virus 1 infection [PATH:ko05170]|calmodulin	Human Diseases|Infectious disease: viral|Human cytomegalovirus infection [PATH:ko05163]|calmodulin	Human Diseases|Infectious disease: viral|Kaposi sarcoma-associated herpesvirus infection [PATH:ko05167]|calmodulin
Thraus_T1778	CDP-diacylglycerol--inositol 3-phosphatidyltransferase {ECO:0000305}	CDIPT_HUMAN	33.974%	1.28e-12	K00999	2.7.8.11	Metabolism|Carbohydrate metabolism|Inositol phosphate metabolism [PATH:ko00562]|CDP-diacylglycerol--inositol 3-phosphatidyltransferase [EC:2.7.8.11]	Metabolism|Lipid metabolism|Glycerophospholipid metabolism [PATH:ko00564]|CDP-diacylglycerol--inositol 3-phosphatidyltransferase [EC:2.7.8.11]	Environmental Information Processing|Signal transduction|Phosphatidylinositol signaling system [PATH:ko04070]|CDP-diacylglycerol--inositol 3-phosphatidyltransferase [EC:2.7.8.11]
Thraus_T1779	Vacuolar protein sorting-associated protein 27	VPS27_YEAST	53.846%	1.71e-14	K12182	NO_EC_NUMBER	Cellular Processes|Transport and catabolism|Endocytosis [PATH:ko04144]|hepatocyte growth factor-regulated tyrosine kinase substrate	Cellular Processes|Transport and catabolism|Phagosome [PATH:ko04145]|hepatocyte growth factor-regulated tyrosine kinase substrate	Brite Hierarchies|Protein families: genetic information processing|Membrane trafficking [BR:ko04131]|hepatocyte growth factor-regulated tyrosine kinase substrate
Thraus_T3556	Calcium/calmodulin-dependent protein kinase type 1D	KCC1D_MOUSE	41.391%	8.45e-82	NO_KO_DATA	NO_EC_NUMBER	NO_KO_DATA
Thraus_T1916	Cobalamin trafficking protein CblD {ECO:0000303|PubMed:26364851}	MMAD_HUMAN	29.565%	6.07e-12	NO_KO_DATA	NO_EC_NUMBER	NO_KO_DATA
Thraus_T4308	Serine/threonine-protein phosphatase 5	PPP5_ARATH	49.822%	1.28e-83	K04460	3.1.3.16	Environmental Information Processing|Signal transduction|MAPK signaling pathway [PATH:ko04010]|serine/threonine-protein phosphatase 5 [EC:3.1.3.16]	Brite Hierarchies|Protein families: metabolism|Protein phosphatases and associated proteins [BR:ko01009]|serine/threonine-protein phosphatase 5 [EC:3.1.3.16]
Thraus_T4309	Proteasome subunit alpha type-4	PSA4_SPIOL	63.81%	1.52e-101	NO_KO_DATA	NO_EC_NUMBER	NO_KO_DATA
Thraus_T3947	Tubulin beta chain	TBB1_PARTE	93.427%	0	K07375	NO_EC_NUMBER	Cellular Processes|Transport and catabolism|Phagosome [PATH:ko04145]|tubulin beta	Cellular Processes|Cellular community - eukaryotes|Gap junction [PATH:ko04540]|tubulin beta	Human Diseases|Infectious disease: bacterial|Pathogenic Escherichia coli infection [PATH:ko05130]|tubulin beta	Brite Hierarchies|Protein families: genetic information processing|Chromosome and associated proteins [BR:ko03036]|tubulin beta	Brite Hierarchies|Protein families: signaling and cellular processes|Cytoskeleton proteins [BR:ko04812]|tubulin beta	Brite Hierarchies|Protein families: signaling and cellular processes|Exosome [BR:ko04147]|tubulin beta
Thraus_T1911	Transmembrane protein 231	TM231_DANRE	33.66%	2.45e-52	K19362	NO_EC_NUMBER	Brite Hierarchies|Protein families: genetic information processing|Chromosome and associated proteins [BR:ko03036]|transmembrane protein 231
Thraus_T3946	EH domain-containing protein 2 {ECO:0000305}	EHD2_HUMAN	32.937%	2.79e-31	K12469	NO_EC_NUMBER	Cellular Processes|Transport and catabolism|Endocytosis [PATH:ko04144]|EH domain-containing protein 2
Thraus_T1912	E3 ubiquitin-protein ligase RNF181	RN181_DANRE	35.065%	2.91e-09	K22378	2.3.2.27	Brite Hierarchies|Protein families: genetic information processing|Ubiquitin system [BR:ko04121]|E3 ubiquitin-protein ligase RNF181 [EC:2.3.2.27]
Thraus_T3688	Probable RNA methyltransferase CG11342	BN3D3_DROME	36.683%	1.89e-21	NO_KO_DATA	NO_EC_NUMBER	NO_KO_DATA
Thraus_T3686	Cyclin-dependent kinase 20	CDK20_DANRE	39.236%	5.2e-57	K08817	2.7.11.22	Brite Hierarchies|Protein families: metabolism|Protein kinases [BR:ko01001]|cell cycle related kinase [EC:2.7.11.22]
Thraus_T3687	ER membrane protein complex subunit 2	EMC2_DANRE	46.707%	1.11e-44	K23563	NO_EC_NUMBER	Brite Hierarchies|Protein families: genetic information processing|Membrane trafficking [BR:ko04131]|ER membrane protein complex subunit 2
Thraus_T3684	DNA topoisomerase 1 beta {ECO:0000305}	TOP1B_ARATH	47.452%	1.18e-165	K03163	5.6.2.1	Brite Hierarchies|Protein families: genetic information processing|DNA replication proteins [BR:ko03032]|DNA topoisomerase I [EC:5.6.2.1]
Thraus_T1913	Probable protein phosphatase 2C 52	P2C52_ORYSJ	37.945%	2.06e-51	K17506	3.1.3.16	Brite Hierarchies|Protein families: metabolism|Protein phosphatases and associated proteins [BR:ko01009]|protein phosphatase 1L [EC:3.1.3.16]
Thraus_T1952	Glutamate formimidoyltransferase	GLFT_STRP1	27.778%	1.28e-08	K00603	2.1.2.5|6.3.3.2	Metabolism|Amino acid metabolism|Histidine metabolism [PATH:ko00340]|glutamate formiminotransferase / 5-formyltetrahydrofolate cyclo-ligase [EC:2.1.2.5 6.3.3.2]	Metabolism|Metabolism of cofactors and vitamins|One carbon pool by folate [PATH:ko00670]|glutamate formiminotransferase / 5-formyltetrahydrofolate cyclo-ligase [EC:2.1.2.5 6.3.3.2]
Thraus_T3683	Protein DD3-3	DD3_DICDI	35.494%	4.57e-96	NO_KO_DATA	NO_EC_NUMBER	NO_KO_DATA
Thraus_T3680	Dihydrolipoyllysine-residue acetyltransferase component of pyruvate dehydrogenase complex	ODP2_RICPR	34.152%	6.24e-65	K00627	2.3.1.12	Metabolism|Carbohydrate metabolism|Glycolysis / Gluconeogenesis [PATH:ko00010]|pyruvate dehydrogenase E2 component (dihydrolipoamide acetyltransferase) [EC:2.3.1.12]	Metabolism|Carbohydrate metabolism|Citrate cycle (TCA cycle) [PATH:ko00020]|pyruvate dehydrogenase E2 component (dihydrolipoamide acetyltransferase) [EC:2.3.1.12]	Metabolism|Carbohydrate metabolism|Pyruvate metabolism [PATH:ko00620]|pyruvate dehydrogenase E2 component (dihydrolipoamide acetyltransferase) [EC:2.3.1.12]
Thraus_T3681	ABC transporter C family member 3	ABCC3_DICDI	40.821%	6.02e-165	NO_KO_DATA	NO_EC_NUMBER	NO_KO_DATA
Thraus_T1828	Protein transport protein Sec61 subunit gamma	SC61G_DICDI	100%	6.46e-06	K07342	NO_EC_NUMBER	Genetic Information Processing|Folding, sorting and degradation|Protein export [PATH:ko03060]|protein transport protein SEC61 subunit gamma and related proteins	Genetic Information Processing|Folding, sorting and degradation|Protein processing in endoplasmic reticulum [PATH:ko04141]|protein transport protein SEC61 subunit gamma and related proteins	Cellular Processes|Transport and catabolism|Phagosome [PATH:ko04145]|protein transport protein SEC61 subunit gamma and related proteins	Human Diseases|Infectious disease: bacterial|Vibrio cholerae infection [PATH:ko05110]|protein transport protein SEC61 subunit gamma and related proteins	Brite Hierarchies|Protein families: signaling and cellular processes|Secretion system [BR:ko02044]|protein transport protein SEC61 subunit gamma and related proteins
Thraus_T1829	Pre-mRNA-splicing factor prp5	PRP46_SCHPO	62.5%	8.58e-139	K12862	NO_EC_NUMBER	Genetic Information Processing|Transcription|Spliceosome [PATH:ko03040]|pleiotropic regulator 1	Brite Hierarchies|Protein families: genetic information processing|Spliceosome [BR:ko03041]|pleiotropic regulator 1	Brite Hierarchies|Protein families: genetic information processing|DNA repair and recombination proteins [BR:ko03400]|pleiotropic regulator 1
Thraus_T5453	Plastidic ATP/ADP-transporter	TLC1_SOLTU	45.055%	9.41e-17	K03301	NO_EC_NUMBER	Not Included in Pathway or Brite|Unclassified: signaling and cellular processes|Transport|ATP:ADP antiporter, AAA family
Thraus_T236	Guanine nucleotide-binding protein alpha-1 subunit	GPA1_DICDI	37.072%	4.11e-74	K04630	NO_EC_NUMBER	Environmental Information Processing|Signal transduction|Rap1 signaling pathway [PATH:ko04015]|guanine nucleotide-binding protein G(i) subunit alpha	Environmental Information Processing|Signal transduction|Apelin signaling pathway [PATH:ko04371]|guanine nucleotide-binding protein G(i) subunit alpha	Environmental Information Processing|Signal transduction|Sphingolipid signaling pathway [PATH:ko04071]|guanine nucleotide-binding protein G(i) subunit alpha	Environmental Information Processing|Signal transduction|cAMP signaling pathway [PATH:ko04024]|guanine nucleotide-binding protein G(i) subunit alpha	Environmental Information Processing|Signal transduction|cGMP-PKG signaling pathway [PATH:ko04022]|guanine nucleotide-binding protein G(i) subunit alpha	Cellular Processes|Cell growth and death|Meiosis - yeast [PATH:ko04113]|guanine nucleotide-binding protein G(i) subunit alpha	Cellular Processes|Cellular community - eukaryotes|Gap junction [PATH:ko04540]|guanine nucleotide-binding protein G(i) subunit alpha	Organismal Systems|Immune system|Platelet activation [PATH:ko04611]|guanine nucleotide-binding protein G(i) subunit alpha	Organismal Systems|Immune system|Leukocyte transendothelial migration [PATH:ko04670]|guanine nucleotide-binding protein G(i) subunit alpha	Organismal Systems|Immune system|Chemokine signaling pathway [PATH:ko04062]|guanine nucleotide-binding protein G(i) subunit alpha	Organismal Systems|Endocrine system|Regulation of lipolysis in adipocytes [PATH:ko04923]|guanine nucleotide-binding protein G(i) subunit alpha	Organismal Systems|Endocrine system|Estrogen signaling pathway [PATH:ko04915]|guanine nucleotide-binding protein G(i) subunit alpha	Organismal Systems|Endocrine system|Progesterone-mediated oocyte maturation [PATH:ko04914]|guanine nucleotide-binding protein G(i) subunit alpha	Organismal Systems|Endocrine system|Oxytocin signaling pathway [PATH:ko04921]|guanine nucleotide-binding protein G(i) subunit alpha	Organismal Systems|Endocrine system|Relaxin signaling pathway [PATH:ko04926]|guanine nucleotide-binding protein G(i) subunit alpha	Organismal Systems|Endocrine system|Growth hormone synthesis, secretion and action [PATH:ko04935]|guanine nucleotide-binding protein G(i) subunit alpha	Organismal Systems|Endocrine system|Parathyroid hormone synthesis, secretion and action [PATH:ko04928]|guanine nucleotide-binding protein G(i) subunit alpha	Organismal Systems|Endocrine system|Melanogenesis [PATH:ko04916]|guanine nucleotide-binding protein G(i) subunit alpha	Organismal Systems|Endocrine system|Renin secretion [PATH:ko04924]|guanine nucleotide-binding protein G(i) subunit alpha	Organismal Systems|Circulatory system|Adrenergic signaling in cardiomyocytes [PATH:ko04261]|guanine nucleotide-binding protein G(i) subunit alpha	Organismal Systems|Digestive system|Gastric acid secretion [PATH:ko04971]|guanine nucleotide-binding protein G(i) subunit alpha	Organismal Systems|Nervous system|Glutamatergic synapse [PATH:ko04724]|guanine nucleotide-binding protein G(i) subunit alpha	Organismal Systems|Nervous system|GABAergic synapse [PATH:ko04727]|guanine nucleotide-binding protein G(i) subunit alpha	Organismal Systems|Nervous system|Cholinergic synapse [PATH:ko04725]|guanine nucleotide-binding protein G(i) subunit alpha	Organismal Systems|Nervous system|Dopaminergic synapse [PATH:ko04728]|guanine nucleotide-binding protein G(i) subunit alpha	Organismal Systems|Nervous system|Serotonergic synapse [PATH:ko04726]|guanine nucleotide-binding protein G(i) subunit alpha	Organismal Systems|Nervous system|Long-term depression [PATH:ko04730]|guanine nucleotide-binding protein G(i) subunit alpha	Organismal Systems|Nervous system|Retrograde endocannabinoid signaling [PATH:ko04723]|guanine nucleotide-binding protein G(i) subunit alpha	Organismal Systems|Development and regeneration|Axon guidance [PATH:ko04360]|guanine nucleotide-binding protein G(i) subunit alpha	Organismal Systems|Environmental adaptation|Circadian entrainment [PATH:ko04713]|guanine nucleotide-binding protein G(i) subunit alpha	Human Diseases|Cancer: overview|Pathways in cancer [PATH:ko05200]|guanine nucleotide-binding protein G(i) subunit alpha	Human Diseases|Neurodegenerative disease|Parkinson disease [PATH:ko05012]|guanine nucleotide-binding protein G(i) subunit alpha	Human Diseases|Substance dependence|Cocaine addiction [PATH:ko05030]|guanine nucleotide-binding protein G(i) subunit alpha	Human Diseases|Substance dependence|Morphine addiction [PATH:ko05032]|guanine nucleotide-binding protein G(i) subunit alpha	Human Diseases|Substance dependence|Alcoholism [PATH:ko05034]|guanine nucleotide-binding protein G(i) subunit alpha	Human Diseases|Endocrine and metabolic disease|Cushing syndrome [PATH:ko04934]|guanine nucleotide-binding protein G(i) subunit alpha	Human Diseases|Infectious disease: bacterial|Pertussis [PATH:ko05133]|guanine nucleotide-binding protein G(i) subunit alpha	Human Diseases|Infectious disease: viral|Human immunodeficiency virus 1 infection [PATH:ko05170]|guanine nucleotide-binding protein G(i) subunit alpha	Human Diseases|Infectious disease: viral|Human cytomegalovirus infection [PATH:ko05163]|guanine nucleotide-binding protein G(i) subunit alpha	Human Diseases|Infectious disease: parasitic|Toxoplasmosis [PATH:ko05145]|guanine nucleotide-binding protein G(i) subunit alpha	Human Diseases|Infectious disease: parasitic|Chagas disease (American trypanosomiasis) [PATH:ko05142]|guanine nucleotide-binding protein G(i) subunit alpha	Brite Hierarchies|Protein families: signaling and cellular processes|Exosome [BR:ko04147]|guanine nucleotide-binding protein G(i) subunit alpha	Brite Hierarchies|Protein families: signaling and cellular processes|GTP-binding proteins [BR:ko04031]|guanine nucleotide-binding protein G(i) subunit alpha
Thraus_T1820	Myotubularin-related protein 6 {ECO:0000305}	MTMR6_CAEEL	36.364%	2.23e-51	K18083	3.1.3.64|3.1.3.95	Metabolism|Carbohydrate metabolism|Inositol phosphate metabolism [PATH:ko00562]|myotubularin-related protein 6/7/8 [EC:3.1.3.64 3.1.3.95]	Environmental Information Processing|Signal transduction|Phosphatidylinositol signaling system [PATH:ko04070]|myotubularin-related protein 6/7/8 [EC:3.1.3.64 3.1.3.95]	Cellular Processes|Transport and catabolism|Autophagy - yeast [PATH:ko04138]|myotubularin-related protein 6/7/8 [EC:3.1.3.64 3.1.3.95]	Brite Hierarchies|Protein families: metabolism|Protein phosphatases and associated proteins [BR:ko01009]|myotubularin-related protein 6/7/8 [EC:3.1.3.64 3.1.3.95]
Thraus_T1821	SH3 domain-containing protein PJ696.02	YIE2_SCHPO	34.615%	7.47e-17	K20523	NO_EC_NUMBER	Brite Hierarchies|Protein families: genetic information processing|Membrane trafficking [BR:ko04131]|SH3 domain-containing YSC84-like protein 1
Thraus_T1822	Serine/threonine-protein phosphatase 2A catalytic subunit alpha isoform	PP2AA_RABIT	75.333%	2.03e-169	K04382	3.1.3.16	Genetic Information Processing|Translation|mRNA surveillance pathway [PATH:ko03015]|serine/threonine-protein phosphatase 2A catalytic subunit [EC:3.1.3.16]	Environmental Information Processing|Signal transduction|MAPK signaling pathway - fly [PATH:ko04013]|serine/threonine-protein phosphatase 2A catalytic subunit [EC:3.1.3.16]	Environmental Information Processing|Signal transduction|TGF-beta signaling pathway [PATH:ko04350]|serine/threonine-protein phosphatase 2A catalytic subunit [EC:3.1.3.16]	Environmental Information Processing|Signal transduction|Hippo signaling pathway [PATH:ko04390]|serine/threonine-protein phosphatase 2A catalytic subunit [EC:3.1.3.16]	Environmental Information Processing|Signal transduction|Hippo signaling pathway - fly [PATH:ko04391]|serine/threonine-protein phosphatase 2A catalytic subunit [EC:3.1.3.16]	Environmental Information Processing|Signal transduction|Sphingolipid signaling pathway [PATH:ko04071]|serine/threonine-protein phosphatase 2A catalytic subunit [EC:3.1.3.16]	Environmental Information Processing|Signal transduction|PI3K-Akt signaling pathway [PATH:ko04151]|serine/threonine-protein phosphatase 2A catalytic subunit [EC:3.1.3.16]	Environmental Information Processing|Signal transduction|AMPK signaling pathway [PATH:ko04152]|serine/threonine-protein phosphatase 2A catalytic subunit [EC:3.1.3.16]	Cellular Processes|Transport and catabolism|Autophagy - animal [PATH:ko04140]|serine/threonine-protein phosphatase 2A catalytic subunit [EC:3.1.3.16]	Cellular Processes|Transport and catabolism|Autophagy - yeast [PATH:ko04138]|serine/threonine-protein phosphatase 2A catalytic subunit [EC:3.1.3.16]	Cellular Processes|Transport and catabolism|Autophagy - other [PATH:ko04136]|serine/threonine-protein phosphatase 2A catalytic subunit [EC:3.1.3.16]	Cellular Processes|Cell growth and death|Cell cycle - yeast [PATH:ko04111]|serine/threonine-protein phosphatase 2A catalytic subunit [EC:3.1.3.16]	Cellular Processes|Cell growth and death|Meiosis - yeast [PATH:ko04113]|serine/threonine-protein phosphatase 2A catalytic subunit [EC:3.1.3.16]	Cellular Processes|Cell growth and death|Oocyte meiosis [PATH:ko04114]|serine/threonine-protein phosphatase 2A catalytic subunit [EC:3.1.3.16]	Cellular Processes|Cellular community - eukaryotes|Tight junction [PATH:ko04530]|serine/threonine-protein phosphatase 2A catalytic subunit [EC:3.1.3.16]	Organismal Systems|Circulatory system|Adrenergic signaling in cardiomyocytes [PATH:ko04261]|serine/threonine-protein phosphatase 2A catalytic subunit [EC:3.1.3.16]	Organismal Systems|Nervous system|Dopaminergic synapse [PATH:ko04728]|serine/threonine-protein phosphatase 2A catalytic subunit [EC:3.1.3.16]	Organismal Systems|Nervous system|Long-term depression [PATH:ko04730]|serine/threonine-protein phosphatase 2A catalytic subunit [EC:3.1.3.16]	Human Diseases|Infectious disease: viral|Hepatitis C [PATH:ko05160]|serine/threonine-protein phosphatase 2A catalytic subunit [EC:3.1.3.16]	Human Diseases|Infectious disease: viral|Human papillomavirus infection [PATH:ko05165]|serine/threonine-protein phosphatase 2A catalytic subunit [EC:3.1.3.16]	Human Diseases|Infectious disease: parasitic|Chagas disease (American trypanosomiasis) [PATH:ko05142]|serine/threonine-protein phosphatase 2A catalytic subunit [EC:3.1.3.16]	Brite Hierarchies|Protein families: metabolism|Protein phosphatases and associated proteins [BR:ko01009]|serine/threonine-protein phosphatase 2A catalytic subunit [EC:3.1.3.16]	Brite Hierarchies|Protein families: genetic information processing|Chromosome and associated proteins [BR:ko03036]|serine/threonine-protein phosphatase 2A catalytic subunit [EC:3.1.3.16]	Brite Hierarchies|Protein families: signaling and cellular processes|Exosome [BR:ko04147]|serine/threonine-protein phosphatase 2A catalytic subunit [EC:3.1.3.16]
Thraus_T1823	Uncharacterized oxidoreductase C30D10.05c	YB45_SCHPO	35.321%	1.17e-23	NO_KO_DATA	NO_EC_NUMBER	NO_KO_DATA
Thraus_T1824	Mannose-P-dolichol utilization defect 1 protein	MPU1_HUMAN	31.933%	3.28e-20	K09660	NO_EC_NUMBER	Brite Hierarchies|Protein families: metabolism|Glycosyltransferases [BR:ko01003]|mannose-P-dolichol utilization defect 1
Thraus_T235	Carboxypeptidase Y homolog A	CBPYA_LEPMJ	43.066%	7.6e-102	NO_KO_DATA	NO_EC_NUMBER	NO_KO_DATA
Thraus_T1827	LIM and SH3 domain protein Lasp	LASP1_DROME	42.553%	1.58e-07	NO_KO_DATA	NO_EC_NUMBER	NO_KO_DATA
Thraus_T5635	Glycine betaine transporter 1 {ECO:0000305}	BCCT3_VIBPA	34.156%	3.5e-69	K03451	NO_EC_NUMBER	Not Included in Pathway or Brite|Unclassified: signaling and cellular processes|Transport|betaine/carnitine transporter, BCCT family
Thraus_T234	Aspartate--tRNA ligase, cytoplasmic {ECO:0000305}	SYDC_HUMAN	50.852%	4.91e-123	K22503	6.1.1.12	Genetic Information Processing|Translation|Aminoacyl-tRNA biosynthesis [PATH:ko00970]|aspartyl-tRNA synthetase [EC:6.1.1.12]	Brite Hierarchies|Protein families: metabolism|Amino acid related enzymes [BR:ko01007]|aspartyl-tRNA synthetase [EC:6.1.1.12]	Brite Hierarchies|Protein families: genetic information processing|Transfer RNA biogenesis [BR:ko03016]|aspartyl-tRNA synthetase [EC:6.1.1.12]
Thraus_T233	Protein phosphatase 1L	PPM1L_HUMAN	29.167%	5.23e-13	K17506	3.1.3.16	Brite Hierarchies|Protein families: metabolism|Protein phosphatases and associated proteins [BR:ko01009]|protein phosphatase 1L [EC:3.1.3.16]
Thraus_T5167	Zinc transporter ZIP10	S39AA_DANRE	38.583%	1.72e-14	K14716	NO_EC_NUMBER	Brite Hierarchies|Protein families: signaling and cellular processes|Transporters [BR:ko02000]|solute carrier family 39 (zinc transporter), member 10
Thraus_T232	O-acetyl-L-homoserine sulfhydrylase 1 {ECO:0000303|PubMed:11566369}	METY1_THET8	57.576%	6.71e-06	K01740	2.5.1.49	Metabolism|Amino acid metabolism|Cysteine and methionine metabolism [PATH:ko00270]|O-acetylhomoserine (thiol)-lyase [EC:2.5.1.49]
Thraus_T3920	Protein NLRC3	NLRC3_MOUSE	40.625%	1.72e-10	NO_KO_DATA	NO_EC_NUMBER	NO_KO_DATA
Thraus_T3048	JmjC domain-containing protein E	JMJCE_DICDI	35.754%	9.16e-31	K19219	1.14.11.63|3.4.-.-	Brite Hierarchies|Protein families: genetic information processing|Chromosome and associated proteins [BR:ko03036]|peptidyl-lysine (3S)-dioxygenase / protease [EC:1.14.11.63 3.4.-.-]
Thraus_T231	Checkpoint protein hus1 homolog	HUS1_DICDI	24.852%	8.73e-12	K10903	NO_EC_NUMBER	Cellular Processes|Cell growth and death|Cellular senescence [PATH:ko04218]|HUS1 checkpoint protein	Brite Hierarchies|Protein families: genetic information processing|DNA repair and recombination proteins [BR:ko03400]|HUS1 checkpoint protein
Thraus_T3044	Replication protein A 70 kDa DNA-binding subunit	RFA1_DANRE	37.333%	9.07e-96	K07466	NO_EC_NUMBER	Genetic Information Processing|Replication and repair|DNA replication [PATH:ko03030]|replication factor A1	Genetic Information Processing|Replication and repair|Nucleotide excision repair [PATH:ko03420]|replication factor A1	Genetic Information Processing|Replication and repair|Mismatch repair [PATH:ko03430]|replication factor A1	Genetic Information Processing|Replication and repair|Homologous recombination [PATH:ko03440]|replication factor A1	Genetic Information Processing|Replication and repair|Fanconi anemia pathway [PATH:ko03460]|replication factor A1	Brite Hierarchies|Protein families: genetic information processing|Transcription factors [BR:ko03000]|replication factor A1	Brite Hierarchies|Protein families: genetic information processing|DNA replication proteins [BR:ko03032]|replication factor A1	Brite Hierarchies|Protein families: genetic information processing|DNA repair and recombination proteins [BR:ko03400]|replication factor A1
Thraus_T3046	Mitogen-activated protein kinase kinase 3 {ECO:0000303|PubMed:10048483, ECO:0000303|PubMed:12119167}	M2K3_ARATH	41.667%	2.36e-65	K20607	2.7.12.2	Environmental Information Processing|Signal transduction|MAPK signaling pathway - plant [PATH:ko04016]|mitogen-activated protein kinase kinase 3 [EC:2.7.12.2]	Human Diseases|Cardiovascular disease|Fluid shear stress and atherosclerosis [PATH:ko05418]|mitogen-activated protein kinase kinase 3 [EC:2.7.12.2]	Brite Hierarchies|Protein families: metabolism|Protein kinases [BR:ko01001]|mitogen-activated protein kinase kinase 3 [EC:2.7.12.2]
Thraus_T230	Mitochondrial metalloendopeptidase OMA1 {ECO:0000305}	OMA1_SCHPO	37.143%	3.35e-16	K23010	3.4.24.-	Brite Hierarchies|Protein families: metabolism|Peptidases and inhibitors [BR:ko01002]|metalloendopeptidase OMA1, mitochondrial [EC:3.4.24.-]
Thraus_T3040	Probable phospholipid-transporting ATPase DRS2	ATC3_YEAST	39.957%	1.47e-96	K14802	7.6.2.1	Brite Hierarchies|Protein families: genetic information processing|Ribosome biogenesis [BR:ko03009]|phospholipid-transporting ATPase [EC:7.6.2.1]
Thraus_T3041	EF-hand domain-containing family member B {ECO:0000305}	EFHB_MOUSE	43.902%	6.82e-15	K23929	NO_EC_NUMBER
Thraus_T3042	2-amino-3-carboxymuconate-6-semialdehyde decarboxylase {ECO:0000303|PubMed:12140278}	ACMSD_HUMAN	43.567%	3.24e-96	K03392	4.1.1.45	Metabolism|Amino acid metabolism|Tryptophan metabolism [PATH:ko00380]|aminocarboxymuconate-semialdehyde decarboxylase [EC:4.1.1.45]
Thraus_T3043	Magnesium transporter MRS2-7	MRS27_ARATH	24.232%	1.31e-17	K16075	NO_EC_NUMBER	Brite Hierarchies|Protein families: signaling and cellular processes|Transporters [BR:ko02000]|magnesium transporter
Thraus_T3245	Eukaryotic peptide chain release factor subunit 1	ERF1_POLMI	68.473%	0	NO_KO_DATA	NO_EC_NUMBER	NO_KO_DATA
Thraus_T620	NAD-dependent malic enzyme {ECO:0000255|HAMAP-Rule:MF_01619}	MAO1_ALIF1	59.292%	2.57e-34	K00027	1.1.1.38	Metabolism|Carbohydrate metabolism|Pyruvate metabolism [PATH:ko00620]|malate dehydrogenase (oxaloacetate-decarboxylating) [EC:1.1.1.38]	Environmental Information Processing|Signal transduction|Two-component system [PATH:ko02020]|malate dehydrogenase (oxaloacetate-decarboxylating) [EC:1.1.1.38]
Thraus_T621	Interferon-induced, double-stranded RNA-activated protein kinase	E2AK2_RAT	28.571%	8.3e-12	K16195	2.7.11.1	Genetic Information Processing|Folding, sorting and degradation|Protein processing in endoplasmic reticulum [PATH:ko04141]|eukaryotic translation initiation factor 2-alpha kinase 2 [EC:2.7.11.1]	Cellular Processes|Cell growth and death|Necroptosis [PATH:ko04217]|eukaryotic translation initiation factor 2-alpha kinase 2 [EC:2.7.11.1]	Human Diseases|Cancer: overview|Viral carcinogenesis [PATH:ko05203]|eukaryotic translation initiation factor 2-alpha kinase 2 [EC:2.7.11.1]	Human Diseases|Infectious disease: viral|Measles [PATH:ko05162]|eukaryotic translation initiation factor 2-alpha kinase 2 [EC:2.7.11.1]	Human Diseases|Infectious disease: viral|Influenza A [PATH:ko05164]|eukaryotic translation initiation factor 2-alpha kinase 2 [EC:2.7.11.1]	Human Diseases|Infectious disease: viral|Hepatitis C [PATH:ko05160]|eukaryotic translation initiation factor 2-alpha kinase 2 [EC:2.7.11.1]	Human Diseases|Infectious disease: viral|Herpes simplex virus 1 infection [PATH:ko05168]|eukaryotic translation initiation factor 2-alpha kinase 2 [EC:2.7.11.1]	Human Diseases|Infectious disease: viral|Kaposi sarcoma-associated herpesvirus infection [PATH:ko05167]|eukaryotic translation initiation factor 2-alpha kinase 2 [EC:2.7.11.1]	Human Diseases|Infectious disease: viral|Epstein-Barr virus infection [PATH:ko05169]|eukaryotic translation initiation factor 2-alpha kinase 2 [EC:2.7.11.1]	Human Diseases|Infectious disease: viral|Human papillomavirus infection [PATH:ko05165]|eukaryotic translation initiation factor 2-alpha kinase 2 [EC:2.7.11.1]	Brite Hierarchies|Protein families: metabolism|Protein kinases [BR:ko01001]|eukaryotic translation initiation factor 2-alpha kinase 2 [EC:2.7.11.1]	Brite Hierarchies|Protein families: metabolism|Protein phosphatases and associated proteins [BR:ko01009]|eukaryotic translation initiation factor 2-alpha kinase 2 [EC:2.7.11.1]	Brite Hierarchies|Protein families: genetic information processing|Messenger RNA biogenesis [BR:ko03019]|eukaryotic translation initiation factor 2-alpha kinase 2 [EC:2.7.11.1]
Thraus_T622	Anaphase-promoting complex subunit 1	APC1_HUMAN	40.921%	1.53e-59	K03348	NO_EC_NUMBER	Genetic Information Processing|Folding, sorting and degradation|Ubiquitin mediated proteolysis [PATH:ko04120]|anaphase-promoting complex subunit 1	Cellular Processes|Cell growth and death|Cell cycle [PATH:ko04110]|anaphase-promoting complex subunit 1	Cellular Processes|Cell growth and death|Cell cycle - yeast [PATH:ko04111]|anaphase-promoting complex subunit 1	Cellular Processes|Cell growth and death|Meiosis - yeast [PATH:ko04113]|anaphase-promoting complex subunit 1	Cellular Processes|Cell growth and death|Oocyte meiosis [PATH:ko04114]|anaphase-promoting complex subunit 1	Organismal Systems|Endocrine system|Progesterone-mediated oocyte maturation [PATH:ko04914]|anaphase-promoting complex subunit 1	Human Diseases|Infectious disease: viral|Human T-cell leukemia virus 1 infection [PATH:ko05166]|anaphase-promoting complex subunit 1	Brite Hierarchies|Protein families: genetic information processing|Ubiquitin system [BR:ko04121]|anaphase-promoting complex subunit 1	Brite Hierarchies|Protein families: genetic information processing|Chromosome and associated proteins [BR:ko03036]|anaphase-promoting complex subunit 1
Thraus_T623	UDP-glycosyltransferase TURAN {ECO:0000303|PubMed:25919390}	TUN_ARATH	45.507%	4.21e-76	K03842	2.4.1.142	Metabolism|Glycan biosynthesis and metabolism|N-Glycan biosynthesis [PATH:ko00510]|beta-1,4-mannosyltransferase [EC:2.4.1.142]	Metabolism|Glycan biosynthesis and metabolism|Various types of N-glycan biosynthesis [PATH:ko00513]|beta-1,4-mannosyltransferase [EC:2.4.1.142]	Brite Hierarchies|Protein families: metabolism|Glycosyltransferases [BR:ko01003]|beta-1,4-mannosyltransferase [EC:2.4.1.142]
Thraus_T624	Probable ATP-dependent RNA helicase ddx52	DDX52_DICDI	52.756%	1.47e-133	K14779	3.6.4.13	Brite Hierarchies|Protein families: genetic information processing|Ribosome biogenesis [BR:ko03009]|ATP-dependent RNA helicase DDX52/ROK1 [EC:3.6.4.13]
Thraus_T625	Neuferricin homolog	NEUFC_CAEEL	47%	2.01e-17	NO_KO_DATA	NO_EC_NUMBER	NO_KO_DATA
Thraus_T626	Armadillo repeat-containing protein 6	ARMC6_MOUSE	59.184%	2.02e-10	NO_KO_DATA	NO_EC_NUMBER	NO_KO_DATA
Thraus_T627	CSC1-like protein ERD4 {ECO:0000305}	CSCLD_ARATH	24.265%	6.88e-22	K21989	NO_EC_NUMBER	Brite Hierarchies|Protein families: signaling and cellular processes|Transporters [BR:ko02000]|calcium permeable stress-gated cation channel
Thraus_T628	Protein kinase C beta type	KPCB_XENTR	31.143%	3.76e-32	K19662	2.7.11.13	Environmental Information Processing|Signal transduction|Ras signaling pathway [PATH:ko04014]|classical protein kinase C beta type [EC:2.7.11.13]	Environmental Information Processing|Signal transduction|Rap1 signaling pathway [PATH:ko04015]|classical protein kinase C beta type [EC:2.7.11.13]	Environmental Information Processing|Signal transduction|MAPK signaling pathway [PATH:ko04010]|classical protein kinase C beta type [EC:2.7.11.13]	Environmental Information Processing|Signal transduction|ErbB signaling pathway [PATH:ko04012]|classical protein kinase C beta type [EC:2.7.11.13]	Environmental Information Processing|Signal transduction|Wnt signaling pathway [PATH:ko04310]|classical protein kinase C beta type [EC:2.7.11.13]	Environmental Information Processing|Signal transduction|VEGF signaling pathway [PATH:ko04370]|classical protein kinase C beta type [EC:2.7.11.13]	Environmental Information Processing|Signal transduction|NF-kappa B signaling pathway [PATH:ko04064]|classical protein kinase C beta type [EC:2.7.11.13]	Environmental Information Processing|Signal transduction|HIF-1 signaling pathway [PATH:ko04066]|classical protein kinase C beta type [EC:2.7.11.13]	Environmental Information Processing|Signal transduction|Calcium signaling pathway [PATH:ko04020]|classical protein kinase C beta type [EC:2.7.11.13]	Environmental Information Processing|Signal transduction|Phosphatidylinositol signaling system [PATH:ko04070]|classical protein kinase C beta type [EC:2.7.11.13]	Environmental Information Processing|Signal transduction|Sphingolipid signaling pathway [PATH:ko04071]|classical protein kinase C beta type [EC:2.7.11.13]	Environmental Information Processing|Signal transduction|mTOR signaling pathway [PATH:ko04150]|classical protein kinase C beta type [EC:2.7.11.13]	Cellular Processes|Cellular community - eukaryotes|Focal adhesion [PATH:ko04510]|classical protein kinase C beta type [EC:2.7.11.13]	Cellular Processes|Cellular community - eukaryotes|Gap junction [PATH:ko04540]|classical protein kinase C beta type [EC:2.7.11.13]	Organismal Systems|Immune system|Natural killer cell mediated cytotoxicity [PATH:ko04650]|classical protein kinase C beta type [EC:2.7.11.13]	Organismal Systems|Immune system|B cell receptor signaling pathway [PATH:ko04662]|classical protein kinase C beta type [EC:2.7.11.13]	Organismal Systems|Immune system|Fc gamma R-mediated phagocytosis [PATH:ko04666]|classical protein kinase C beta type [EC:2.7.11.13]	Organismal Systems|Immune system|Leukocyte transendothelial migration [PATH:ko04670]|classical protein kinase C beta type [EC:2.7.11.13]	Organismal Systems|Immune system|Chemokine signaling pathway [PATH:ko04062]|classical protein kinase C beta type [EC:2.7.11.13]	Organismal Systems|Endocrine system|Insulin secretion [PATH:ko04911]|classical protein kinase C beta type [EC:2.7.11.13]	Organismal Systems|Endocrine system|GnRH secretion [PATH:ko04929]|classical protein kinase C beta type [EC:2.7.11.13]	Organismal Systems|Endocrine system|GnRH signaling pathway [PATH:ko04912]|classical protein kinase C beta type [EC:2.7.11.13]	Organismal Systems|Endocrine system|Oxytocin signaling pathway [PATH:ko04921]|classical protein kinase C beta type [EC:2.7.11.13]	Organismal Systems|Endocrine system|Growth hormone synthesis, secretion and action [PATH:ko04935]|classical protein kinase C beta type [EC:2.7.11.13]	Organismal Systems|Endocrine system|Thyroid hormone synthesis [PATH:ko04918]|classical protein kinase C beta type [EC:2.7.11.13]	Organismal Systems|Endocrine system|Thyroid hormone signaling pathway [PATH:ko04919]|classical protein kinase C beta type [EC:2.7.11.13]	Organismal Systems|Endocrine system|Parathyroid hormone synthesis, secretion and action [PATH:ko04928]|classical protein kinase C beta type [EC:2.7.11.13]	Organismal Systems|Endocrine system|Melanogenesis [PATH:ko04916]|classical protein kinase C beta type [EC:2.7.11.13]	Organismal Systems|Endocrine system|Aldosterone synthesis and secretion [PATH:ko04925]|classical protein kinase C beta type [EC:2.7.11.13]	Organismal Systems|Circulatory system|Vascular smooth muscle contraction [PATH:ko04270]|classical protein kinase C beta type [EC:2.7.11.13]	Organismal Systems|Digestive system|Salivary secretion [PATH:ko04970]|classical protein kinase C beta type [EC:2.7.11.13]	Organismal Systems|Digestive system|Gastric acid secretion [PATH:ko04971]|classical protein kinase C beta type [EC:2.7.11.13]	Organismal Systems|Digestive system|Pancreatic secretion [PATH:ko04972]|classical protein kinase C beta type [EC:2.7.11.13]	Organismal Systems|Digestive system|Carbohydrate digestion and absorption [PATH:ko04973]|classical protein kinase C beta type [EC:2.7.11.13]	Organismal Systems|Excretory system|Aldosterone-regulated sodium reabsorption [PATH:ko04960]|classical protein kinase C beta type [EC:2.7.11.13]	Organismal Systems|Excretory system|Endocrine and other factor-regulated calcium reabsorption [PATH:ko04961]|classical protein kinase C beta type [EC:2.7.11.13]	Organismal Systems|Nervous system|Glutamatergic synapse [PATH:ko04724]|classical protein kinase C beta type [EC:2.7.11.13]	Organismal Systems|Nervous system|GABAergic synapse [PATH:ko04727]|classical protein kinase C beta type [EC:2.7.11.13]	Organismal Systems|Nervous system|Cholinergic synapse [PATH:ko04725]|classical protein kinase C beta type [EC:2.7.11.13]	Organismal Systems|Nervous system|Dopaminergic synapse [PATH:ko04728]|classical protein kinase C beta type [EC:2.7.11.13]	Organismal Systems|Nervous system|Serotonergic synapse [PATH:ko04726]|classical protein kinase C beta type [EC:2.7.11.13]	Organismal Systems|Nervous system|Long-term potentiation [PATH:ko04720]|classical protein kinase C beta type [EC:2.7.11.13]	Organismal Systems|Nervous system|Long-term depression [PATH:ko04730]|classical protein kinase C beta type [EC:2.7.11.13]
Thraus_T629	Dual specificity protein phosphatase 1B	DUS1B_ARATH	34.459%	4.79e-14	K20551	3.1.3.16|3.1.3.48	Environmental Information Processing|Signal transduction|MAPK signaling pathway - plant [PATH:ko04016]|dual specificity protein phosphatase 1B [EC:3.1.3.16 3.1.3.48]	Brite Hierarchies|Protein families: metabolism|Protein phosphatases and associated proteins [BR:ko01009]|dual specificity protein phosphatase 1B [EC:3.1.3.16 3.1.3.48]
Thraus_T5484	3-oxoacyl-[acyl-carrier-protein] synthase, mitochondrial	KASM_ARATH	46.25%	3.91e-52	K09458	2.3.1.179	Metabolism|Lipid metabolism|Fatty acid biosynthesis [PATH:ko00061]|3-oxoacyl-[acyl-carrier-protein] synthase II [EC:2.3.1.179]	Metabolism|Metabolism of cofactors and vitamins|Biotin metabolism [PATH:ko00780]|3-oxoacyl-[acyl-carrier-protein] synthase II [EC:2.3.1.179]	Brite Hierarchies|Protein families: metabolism|Lipid biosynthesis proteins [BR:ko01004]|3-oxoacyl-[acyl-carrier-protein] synthase II [EC:2.3.1.179]
Thraus_T1918	SET domain-containing protein 7	SET7_SCHPO	36.752%	3.02e-23	K07117	NO_EC_NUMBER	Not Included in Pathway or Brite|Poorly characterized|Function unknown|uncharacterized protein
Thraus_T1919	Mitochondrial fission process protein 1	MTFP1_CAEEL	47.015%	1.27e-23	K17981	NO_EC_NUMBER	Brite Hierarchies|Protein families: genetic information processing|Mitochondrial biogenesis [BR:ko03029]|mitochondrial fission process protein 1
Thraus_T4409	FUN14 domain-containing protein 1	FUND1_DANRE	36.765%	4.05e-08	K17986	NO_EC_NUMBER	Cellular Processes|Transport and catabolism|Mitophagy - animal [PATH:ko04137]|FUN14 domain-containing protein 1	Brite Hierarchies|Protein families: genetic information processing|Membrane trafficking [BR:ko04131]|FUN14 domain-containing protein 1	Brite Hierarchies|Protein families: genetic information processing|Mitochondrial biogenesis [BR:ko03029]|FUN14 domain-containing protein 1
Thraus_T1955	TBC1 domain family member 19	TBC19_HUMAN	31.707%	2.22e-21	NO_KO_DATA	NO_EC_NUMBER	NO_KO_DATA
Thraus_T3089	Serine/threonine-protein phosphatase BSU1	BSU1_ARATH	33.929%	3.09e-38	K14501	3.1.3.16	Environmental Information Processing|Signal transduction|Plant hormone signal transduction [PATH:ko04075]|serine/threonine-protein phosphatase BSU1 [EC:3.1.3.16]
Thraus_T5328	RuvB-like 2	RUVB2_XENLA	76.286%	0	NO_KO_DATA	NO_EC_NUMBER	NO_KO_DATA
Thraus_T3363	Soluble calcium-activated nucleotidase 1	CANT1_RAT	40.584%	9.8e-72	K12304	3.6.1.6	Metabolism|Nucleotide metabolism|Purine metabolism [PATH:ko00230]|soluble calcium-activated nucleotidase 1 [EC:3.6.1.6]	Metabolism|Nucleotide metabolism|Pyrimidine metabolism [PATH:ko00240]|soluble calcium-activated nucleotidase 1 [EC:3.6.1.6]
Thraus_T2483	Peptidyl-tRNA hydrolase 2, mitochondrial	PTH2_BOVIN	72.973%	3.61e-12	K04794	3.1.1.29	Brite Hierarchies|Protein families: genetic information processing|Translation factors [BR:ko03012]|peptidyl-tRNA hydrolase, PTH2 family [EC:3.1.1.29]
Thraus_T2482	Ribosomal protein S6 kinase beta-2	KS6B2_MOUSE	33.562%	1.06e-36	K04688	2.7.11.1	Environmental Information Processing|Signal transduction|ErbB signaling pathway [PATH:ko04012]|ribosomal protein S6 kinase beta [EC:2.7.11.1]	Environmental Information Processing|Signal transduction|TGF-beta signaling pathway [PATH:ko04350]|ribosomal protein S6 kinase beta [EC:2.7.11.1]	Environmental Information Processing|Signal transduction|Apelin signaling pathway [PATH:ko04371]|ribosomal protein S6 kinase beta [EC:2.7.11.1]	Environmental Information Processing|Signal transduction|HIF-1 signaling pathway [PATH:ko04066]|ribosomal protein S6 kinase beta [EC:2.7.11.1]	Environmental Information Processing|Signal transduction|PI3K-Akt signaling pathway [PATH:ko04151]|ribosomal protein S6 kinase beta [EC:2.7.11.1]	Environmental Information Processing|Signal transduction|AMPK signaling pathway [PATH:ko04152]|ribosomal protein S6 kinase beta [EC:2.7.11.1]	Environmental Information Processing|Signal transduction|mTOR signaling pathway [PATH:ko04150]|ribosomal protein S6 kinase beta [EC:2.7.11.1]	Cellular Processes|Transport and catabolism|Autophagy - animal [PATH:ko04140]|ribosomal protein S6 kinase beta [EC:2.7.11.1]	Organismal Systems|Immune system|Fc gamma R-mediated phagocytosis [PATH:ko04666]|ribosomal protein S6 kinase beta [EC:2.7.11.1]	Organismal Systems|Endocrine system|Insulin signaling pathway [PATH:ko04910]|ribosomal protein S6 kinase beta [EC:2.7.11.1]	Organismal Systems|Development and regeneration|Axon regeneration [PATH:ko04361]|ribosomal protein S6 kinase beta [EC:2.7.11.1]	Organismal Systems|Aging|Longevity regulating pathway [PATH:ko04211]|ribosomal protein S6 kinase beta [EC:2.7.11.1]	Organismal Systems|Aging|Longevity regulating pathway - worm [PATH:ko04212]|ribosomal protein S6 kinase beta [EC:2.7.11.1]	Organismal Systems|Aging|Longevity regulating pathway - multiple species [PATH:ko04213]|ribosomal protein S6 kinase beta [EC:2.7.11.1]	Organismal Systems|Environmental adaptation|Thermogenesis [PATH:ko04714]|ribosomal protein S6 kinase beta [EC:2.7.11.1]	Human Diseases|Cancer: overview|Pathways in cancer [PATH:ko05200]|ribosomal protein S6 kinase beta [EC:2.7.11.1]	Human Diseases|Cancer: overview|Proteoglycans in cancer [PATH:ko05205]|ribosomal protein S6 kinase beta [EC:2.7.11.1]	Human Diseases|Cancer: overview|Choline metabolism in cancer [PATH:ko05231]|ribosomal protein S6 kinase beta [EC:2.7.11.1]	Human Diseases|Cancer: overview|PD-L1 expression and PD-1 checkpoint pathway in cancer [PATH:ko05235]|ribosomal protein S6 kinase beta [EC:2.7.11.1]	Human Diseases|Cancer: specific types|Colorectal cancer [PATH:ko05210]|ribosomal protein S6 kinase beta [EC:2.7.11.1]	Human Diseases|Cancer: specific types|Pancreatic cancer [PATH:ko05212]|ribosomal protein S6 kinase beta [EC:2.7.11.1]	Human Diseases|Cancer: specific types|Hepatocellular carcinoma [PATH:ko05225]|ribosomal protein S6 kinase beta [EC:2.7.11.1]	Human Diseases|Cancer: specific types|Gastric cancer [PATH:ko05226]|ribosomal protein S6 kinase beta [EC:2.7.11.1]	Human Diseases|Cancer: specific types|Acute myeloid leukemia [PATH:ko05221]|ribosomal protein S6 kinase beta [EC:2.7.11.1]	Human Diseases|Cancer: specific types|Breast cancer [PATH:ko05224]|ribosomal protein S6 kinase beta [EC:2.7.11.1]	Human Diseases|Endocrine and metabolic disease|Insulin resistance [PATH:ko04931]|ribosomal protein S6 kinase beta [EC:2.7.11.1]	Human Diseases|Infectious disease: bacterial|Shigellosis [PATH:ko05131]|ribosomal protein S6 kinase beta [EC:2.7.11.1]	Human Diseases|Infectious disease: viral|Human immunodeficiency virus 1 infection [PATH:ko05170]|ribosomal protein S6 kinase beta [EC:2.7.11.1]	Human Diseases|Infectious disease: viral|Human cytomegalovirus infection [PATH:ko05163]|ribosomal protein S6 kinase beta [EC:2.7.11.1]	Human Diseases|Infectious disease: viral|Human papillomavirus infection [PATH:ko05165]|ribosomal protein S6 kinase beta [EC:2.7.11.1]	Human Diseases|Drug resistance: antineoplastic|EGFR tyrosine kinase inhibitor resistance [PATH:ko01521]|ribosomal protein S6 kinase beta [EC:2.7.11.1]	Human Diseases|Drug resistance: antineoplastic|Endocrine resistance [PATH:ko01522]|ribosomal protein S6 kinase beta [EC:2.7.11.1]	Brite Hierarchies|Protein families: metabolism|Protein kinases [BR:ko01001]|ribosomal protein S6 kinase beta [EC:2.7.11.1]
Thraus_T2480	NADH dehydrogenase [ubiquinone] flavoprotein 2, mitochondrial	NDUV2_DICDI	56.322%	2.92e-61	K03943	7.1.1.2|1.6.99.3	Metabolism|Energy metabolism|Oxidative phosphorylation [PATH:ko00190]|NADH dehydrogenase (ubiquinone) flavoprotein 2 [EC:7.1.1.2 1.6.99.3]	Organismal Systems|Nervous system|Retrograde endocannabinoid signaling [PATH:ko04723]|NADH dehydrogenase (ubiquinone) flavoprotein 2 [EC:7.1.1.2 1.6.99.3]	Organismal Systems|Environmental adaptation|Thermogenesis [PATH:ko04714]|NADH dehydrogenase (ubiquinone) flavoprotein 2 [EC:7.1.1.2 1.6.99.3]	Human Diseases|Neurodegenerative disease|Alzheimer disease [PATH:ko05010]|NADH dehydrogenase (ubiquinone) flavoprotein 2 [EC:7.1.1.2 1.6.99.3]	Human Diseases|Neurodegenerative disease|Parkinson disease [PATH:ko05012]|NADH dehydrogenase (ubiquinone) flavoprotein 2 [EC:7.1.1.2 1.6.99.3]	Human Diseases|Neurodegenerative disease|Huntington disease [PATH:ko05016]|NADH dehydrogenase (ubiquinone) flavoprotein 2 [EC:7.1.1.2 1.6.99.3]	Human Diseases|Endocrine and metabolic disease|Non-alcoholic fatty liver disease (NAFLD) [PATH:ko04932]|NADH dehydrogenase (ubiquinone) flavoprotein 2 [EC:7.1.1.2 1.6.99.3]
Thraus_T2487	Proteasome subunit beta type-5	PSB5_DICDI	53.361%	6.39e-86	K02737	3.4.25.1	Genetic Information Processing|Folding, sorting and degradation|Proteasome [PATH:ko03050]|20S proteasome subunit beta 5 [EC:3.4.25.1]	Brite Hierarchies|Protein families: metabolism|Peptidases and inhibitors [BR:ko01002]|20S proteasome subunit beta 5 [EC:3.4.25.1]	Brite Hierarchies|Protein families: genetic information processing|Proteasome [BR:ko03051]|20S proteasome subunit beta 5 [EC:3.4.25.1]
Thraus_T2485	KRR1 small subunit processome component homolog	KRR1_SCHPO	64.925%	1.05e-121	K06961	NO_EC_NUMBER	Brite Hierarchies|Protein families: genetic information processing|Ribosome biogenesis [BR:ko03009]|ribosomal RNA assembly protein
Thraus_T2484	Uncharacterized protein Rv1367c	Y1367_MYCTU	28.889%	3.93e-37	NO_KO_DATA	NO_EC_NUMBER	NO_KO_DATA
Thraus_T3365	Probable prolyl 4-hydroxylase 3 {ECO:0000305}	P4H3_ARATH	33.838%	2e-18	K00472	1.14.11.2	Metabolism|Amino acid metabolism|Arginine and proline metabolism [PATH:ko00330]|prolyl 4-hydroxylase [EC:1.14.11.2]
Thraus_T2489	Pre-mRNA-processing-splicing factor 8	PRP8_MOUSE	61.806%	0	K12856	NO_EC_NUMBER	Genetic Information Processing|Transcription|Spliceosome [PATH:ko03040]|pre-mRNA-processing factor 8	Brite Hierarchies|Protein families: genetic information processing|Spliceosome [BR:ko03041]|pre-mRNA-processing factor 8
Thraus_T2062	Desumoylating isopeptidase 1 {ECO:0000250|UniProtKB:Q9CQT7}	DESI1_XENLA	40.146%	2.97e-25	K22762	3.4.-.-	Brite Hierarchies|Protein families: metabolism|Peptidases and inhibitors [BR:ko01002]|desumoylating isopeptidase 1 [EC:3.4.-.-]	Brite Hierarchies|Protein families: genetic information processing|Ubiquitin system [BR:ko04121]|desumoylating isopeptidase 1 [EC:3.4.-.-]
Thraus_T3706	Propionyl-CoA carboxylase beta chain, mitochondrial {ECO:0000305|PubMed:13752080}	PCCB_PIG	67.427%	0	K01966	6.4.1.3|2.1.3.15	Metabolism|Carbohydrate metabolism|Glyoxylate and dicarboxylate metabolism [PATH:ko00630]|propionyl-CoA carboxylase beta chain [EC:6.4.1.3 2.1.3.15]	Metabolism|Carbohydrate metabolism|Propanoate metabolism [PATH:ko00640]|propionyl-CoA carboxylase beta chain [EC:6.4.1.3 2.1.3.15]	Metabolism|Amino acid metabolism|Valine, leucine and isoleucine degradation [PATH:ko00280]|propionyl-CoA carboxylase beta chain [EC:6.4.1.3 2.1.3.15]
Thraus_T3364	Protein farnesyltransferase subunit beta	FNTB_RAT	46.178%	2.11e-86	K05954	2.5.1.58	Metabolism|Metabolism of terpenoids and polyketides|Terpenoid backbone biosynthesis [PATH:ko00900]|protein farnesyltransferase subunit beta [EC:2.5.1.58]	Brite Hierarchies|Protein families: metabolism|Prenyltransferases [BR:ko01006]|protein farnesyltransferase subunit beta [EC:2.5.1.58]
Thraus_T282	Transcription factor MYB3R-2 {ECO:0000305}	MB3R2_ORYSJ	50.993%	3.56e-48	K09422	NO_EC_NUMBER	Brite Hierarchies|Protein families: genetic information processing|Transcription factors [BR:ko03000]|transcription factor MYB, plant
Thraus_T539	1-phosphatidylinositol-3-phosphate 5-kinase FAB1B	FAB1B_ARATH	43.103%	1.31e-16	K00921	2.7.1.150	Metabolism|Carbohydrate metabolism|Inositol phosphate metabolism [PATH:ko00562]|1-phosphatidylinositol-3-phosphate 5-kinase [EC:2.7.1.150]	Environmental Information Processing|Signal transduction|Phosphatidylinositol signaling system [PATH:ko04070]|1-phosphatidylinositol-3-phosphate 5-kinase [EC:2.7.1.150]	Cellular Processes|Transport and catabolism|Phagosome [PATH:ko04145]|1-phosphatidylinositol-3-phosphate 5-kinase [EC:2.7.1.150]	Cellular Processes|Cell motility|Regulation of actin cytoskeleton [PATH:ko04810]|1-phosphatidylinositol-3-phosphate 5-kinase [EC:2.7.1.150]	Brite Hierarchies|Protein families: genetic information processing|Membrane trafficking [BR:ko04131]|1-phosphatidylinositol-3-phosphate 5-kinase [EC:2.7.1.150]
Thraus_T284	DEAD-box ATP-dependent RNA helicase 35	RH35_ARATH	49.31%	6.65e-138	K13116	3.6.4.13	Brite Hierarchies|Protein families: genetic information processing|Spliceosome [BR:ko03041]|ATP-dependent RNA helicase DDX41 [EC:3.6.4.13]
Thraus_T285	Phosphatidylinositol:ceramide inositolphosphotransferase	IPCS_ORYSJ	27.941%	1.38e-10	NO_KO_DATA	NO_EC_NUMBER	NO_KO_DATA
Thraus_T3457	Probable aminopeptidase NPEPL1	PEPL1_HUMAN	52.716%	6.03e-97	K09611	3.4.11.-	Brite Hierarchies|Protein families: metabolism|Peptidases and inhibitors [BR:ko01002]|probable aminopeptidase NPEPL1 [EC:3.4.11.-]
Thraus_T535	Uracil phosphoribosyltransferase	UPP_DICDI	46.535%	3.48e-50	K00761	2.4.2.9	Metabolism|Nucleotide metabolism|Pyrimidine metabolism [PATH:ko00240]|uracil phosphoribosyltransferase [EC:2.4.2.9]
Thraus_T536	Mitochondrial inner membrane protease ATP23 homolog	ATP23_HUMAN	43.82%	5.09e-40	K18156	3.4.24.-	Brite Hierarchies|Protein families: genetic information processing|Mitochondrial biogenesis [BR:ko03029]|mitochondrial inner membrane protease ATP23 [EC:3.4.24.-]
Thraus_T537	ADP-ribosylation factor-like protein 3	ARL3_TAEGU	41.765%	7.44e-41	NO_KO_DATA	NO_EC_NUMBER	NO_KO_DATA
Thraus_T530	26S proteasome regulatory subunit 6A homolog	PRS6A_ORYSJ	62.439%	3.53e-177	K03065	NO_EC_NUMBER	Genetic Information Processing|Folding, sorting and degradation|Proteasome [PATH:ko03050]|26S proteasome regulatory subunit T5	Human Diseases|Infectious disease: viral|Epstein-Barr virus infection [PATH:ko05169]|26S proteasome regulatory subunit T5	Brite Hierarchies|Protein families: genetic information processing|Proteasome [BR:ko03051]|26S proteasome regulatory subunit T5
Thraus_T3452	Cullin-4	CUL4_ARATH	52.914%	0	K10609	NO_EC_NUMBER	Genetic Information Processing|Folding, sorting and degradation|Ubiquitin mediated proteolysis [PATH:ko04120]|cullin 4	Genetic Information Processing|Replication and repair|Nucleotide excision repair [PATH:ko03420]|cullin 4	Human Diseases|Infectious disease: viral|Human immunodeficiency virus 1 infection [PATH:ko05170]|cullin 4	Brite Hierarchies|Protein families: genetic information processing|Ubiquitin system [BR:ko04121]|cullin 4	Brite Hierarchies|Protein families: genetic information processing|DNA repair and recombination proteins [BR:ko03400]|cullin 4	Brite Hierarchies|Protein families: signaling and cellular processes|Exosome [BR:ko04147]|cullin 4
Thraus_T532	Adenosine deaminase-like protein	ADAL_DROME	32.326%	2.62e-48	K01488	3.5.4.4	Metabolism|Nucleotide metabolism|Purine metabolism [PATH:ko00230]|adenosine deaminase [EC:3.5.4.4]	Human Diseases|Immune disease|Primary immunodeficiency [PATH:ko05340]|adenosine deaminase [EC:3.5.4.4]
Thraus_T533	Uncharacterized Nudix hydrolase NudL	NUDL_KLEAE	41.304%	2.32e-09	NO_KO_DATA	NO_EC_NUMBER	NO_KO_DATA
Thraus_T3080	Outer dynein arm protein 1	ODA1_CHLRE	38.218%	2.11e-54	K23732	NO ENTRY FOUND.
Thraus_T3594	DNA polymerase I B, chloroplastic/mitochondrial	POLIB_ARATH	51.963%	5.15e-136	K02335	2.7.7.7	Genetic Information Processing|Replication and repair|DNA replication [PATH:ko03030]|DNA polymerase I [EC:2.7.7.7]	Genetic Information Processing|Replication and repair|Base excision repair [PATH:ko03410]|DNA polymerase I [EC:2.7.7.7]	Genetic Information Processing|Replication and repair|Nucleotide excision repair [PATH:ko03420]|DNA polymerase I [EC:2.7.7.7]	Genetic Information Processing|Replication and repair|Homologous recombination [PATH:ko03440]|DNA polymerase I [EC:2.7.7.7]	Brite Hierarchies|Protein families: genetic information processing|DNA replication proteins [BR:ko03032]|DNA polymerase I [EC:2.7.7.7]	Brite Hierarchies|Protein families: genetic information processing|DNA repair and recombination proteins [BR:ko03400]|DNA polymerase I [EC:2.7.7.7]
Thraus_T3705	Peroxisomal membrane protein 4	PXMP4_RAT	41.176%	1.07e-28	K13350	NO_EC_NUMBER	Cellular Processes|Transport and catabolism|Peroxisome [PATH:ko04146]|peroxisomal membrane protein 4
Thraus_T4707	Midasin	MDN1_HUMAN	43.983%	2.37e-50	K14572	NO_EC_NUMBER	Genetic Information Processing|Translation|Ribosome biogenesis in eukaryotes [PATH:ko03008]|midasin	Brite Hierarchies|Protein families: genetic information processing|Ribosome biogenesis [BR:ko03009]|midasin
Thraus_T5044	Coatomer subunit delta-1	COPD1_ORYSJ	57.718%	3.01e-50	K20471	NO_EC_NUMBER	Brite Hierarchies|Protein families: genetic information processing|Membrane trafficking [BR:ko04131]|coatomer subunit delta
Thraus_T1957	Sulfoquinovosidase {ECO:0000303|PubMed:26878550}	SQASE_ECOLI	34.397%	3.13e-89	K15922	3.2.1.199	Not Included in Pathway or Brite|Unclassified: metabolism|Enzymes with EC numbers|sulfoquinovosidase [EC:3.2.1.199]
Thraus_T3083	Calcium-transporting ATPase 4, endoplasmic reticulum-type	ECA4_ARATH	55.663%	0	K01537	7.2.2.10	Not Included in Pathway or Brite|Unclassified: metabolism|Enzymes with EC numbers|P-type Ca2+ transporter type 2C [EC:7.2.2.10]
Thraus_T3084	Uncharacterized protein HI_1586	Y1586_HAEIN	35.862%	2.32e-21	K18218	NO_EC_NUMBER	Brite Hierarchies|Protein families: signaling and cellular processes|Transporters [BR:ko02000]|tetracycline resistance efflux pump	Brite Hierarchies|Protein families: signaling and cellular processes|Antimicrobial resistance genes [BR:ko01504]|tetracycline resistance efflux pump
Thraus_T3631	Uncharacterized oxidoreductase At4g09670	Y4967_ARATH	35.942%	6.29e-37	NO_KO_DATA	NO_EC_NUMBER	NO_KO_DATA
Thraus_T1757	Importin subunit alpha-1 {ECO:0000305}	IMPA1_ARATH	55.738%	3.72e-157	K15042	NO_EC_NUMBER	Human Diseases|Infectious disease: viral|Influenza A [PATH:ko05164]|importin subunit alpha-5/6/7	Brite Hierarchies|Protein families: genetic information processing|Chromosome and associated proteins [BR:ko03036]|importin subunit alpha-5/6/7
Thraus_T2159	Calcium/calmodulin-dependent protein kinase type 1 {ECO:0000305}	CAMKI_MACNP	39.928%	1.31e-55	NO_KO_DATA	NO_EC_NUMBER	NO_KO_DATA
Thraus_T2158	UDP-galactopyranose mutase	GLF_MYCTU	38.346%	9.38e-71	K01854	5.4.99.9	Metabolism|Carbohydrate metabolism|Galactose metabolism [PATH:ko00052]|UDP-galactopyranose mutase [EC:5.4.99.9]	Metabolism|Carbohydrate metabolism|Amino sugar and nucleotide sugar metabolism [PATH:ko00520]|UDP-galactopyranose mutase [EC:5.4.99.9]
Thraus_T3630	Calcium/calmodulin-dependent protein kinase type II alpha chain	KCC2A_DROME	35.688%	4.54e-45	K04515	2.7.11.17	Environmental Information Processing|Signal transduction|ErbB signaling pathway [PATH:ko04012]|calcium/calmodulin-dependent protein kinase (CaM kinase) II [EC:2.7.11.17]	Environmental Information Processing|Signal transduction|Wnt signaling pathway [PATH:ko04310]|calcium/calmodulin-dependent protein kinase (CaM kinase) II [EC:2.7.11.17]	Environmental Information Processing|Signal transduction|HIF-1 signaling pathway [PATH:ko04066]|calcium/calmodulin-dependent protein kinase (CaM kinase) II [EC:2.7.11.17]	Environmental Information Processing|Signal transduction|Calcium signaling pathway [PATH:ko04020]|calcium/calmodulin-dependent protein kinase (CaM kinase) II [EC:2.7.11.17]	Environmental Information Processing|Signal transduction|cAMP signaling pathway [PATH:ko04024]|calcium/calmodulin-dependent protein kinase (CaM kinase) II [EC:2.7.11.17]	Cellular Processes|Cell growth and death|Oocyte meiosis [PATH:ko04114]|calcium/calmodulin-dependent protein kinase (CaM kinase) II [EC:2.7.11.17]	Cellular Processes|Cell growth and death|Necroptosis [PATH:ko04217]|calcium/calmodulin-dependent protein kinase (CaM kinase) II [EC:2.7.11.17]	Organismal Systems|Endocrine system|Insulin secretion [PATH:ko04911]|calcium/calmodulin-dependent protein kinase (CaM kinase) II [EC:2.7.11.17]	Organismal Systems|Endocrine system|Glucagon signaling pathway [PATH:ko04922]|calcium/calmodulin-dependent protein kinase (CaM kinase) II [EC:2.7.11.17]	Organismal Systems|Endocrine system|GnRH signaling pathway [PATH:ko04912]|calcium/calmodulin-dependent protein kinase (CaM kinase) II [EC:2.7.11.17]	Organismal Systems|Endocrine system|Oxytocin signaling pathway [PATH:ko04921]|calcium/calmodulin-dependent protein kinase (CaM kinase) II [EC:2.7.11.17]	Organismal Systems|Endocrine system|Melanogenesis [PATH:ko04916]|calcium/calmodulin-dependent protein kinase (CaM kinase) II [EC:2.7.11.17]	Organismal Systems|Endocrine system|Aldosterone synthesis and secretion [PATH:ko04925]|calcium/calmodulin-dependent protein kinase (CaM kinase) II [EC:2.7.11.17]	Organismal Systems|Circulatory system|Adrenergic signaling in cardiomyocytes [PATH:ko04261]|calcium/calmodulin-dependent protein kinase (CaM kinase) II [EC:2.7.11.17]	Organismal Systems|Digestive system|Gastric acid secretion [PATH:ko04971]|calcium/calmodulin-dependent protein kinase (CaM kinase) II [EC:2.7.11.17]	Organismal Systems|Nervous system|Cholinergic synapse [PATH:ko04725]|calcium/calmodulin-dependent protein kinase (CaM kinase) II [EC:2.7.11.17]	Organismal Systems|Nervous system|Dopaminergic synapse [PATH:ko04728]|calcium/calmodulin-dependent protein kinase (CaM kinase) II [EC:2.7.11.17]	Organismal Systems|Nervous system|Long-term potentiation [PATH:ko04720]|calcium/calmodulin-dependent protein kinase (CaM kinase) II [EC:2.7.11.17]	Organismal Systems|Nervous system|Neurotrophin signaling pathway [PATH:ko04722]|calcium/calmodulin-dependent protein kinase (CaM kinase) II [EC:2.7.11.17]	Organismal Systems|Sensory system|Phototransduction - fly [PATH:ko04745]|calcium/calmodulin-dependent protein kinase (CaM kinase) II [EC:2.7.11.17]	Organismal Systems|Sensory system|Olfactory transduction [PATH:ko04740]|calcium/calmodulin-dependent protein kinase (CaM kinase) II [EC:2.7.11.17]	Organismal Systems|Sensory system|Inflammatory mediator regulation of TRP channels [PATH:ko04750]|calcium/calmodulin-dependent protein kinase (CaM kinase) II [EC:2.7.11.17]	Organismal Systems|Development and regeneration|Axon guidance [PATH:ko04360]|calcium/calmodulin-dependent protein kinase (CaM kinase) II [EC:2.7.11.17]	Organismal Systems|Environmental adaptation|Circadian entrainment [PATH:ko04713]|calcium/calmodulin-dependent protein kinase (CaM kinase) II [EC:2.7.11.17]	Human Diseases|Cancer: overview|Pathways in cancer [PATH:ko05200]|calcium/calmodulin-dependent protein kinase (CaM kinase) II [EC:2.7.11.17]	Human Diseases|Cancer: overview|Proteoglycans in cancer [PATH:ko05205]|calcium/calmodulin-dependent protein kinase (CaM kinase) II [EC:2.7.11.17]	Human Diseases|Cancer: specific types|Glioma [PATH:ko05214]|calcium/calmodulin-dependent protein kinase (CaM kinase) II [EC:2.7.11.17]	Human Diseases|Substance dependence|Amphetamine addiction [PATH:ko05031]|calcium/calmodulin-dependent protein kinase (CaM kinase) II [EC:2.7.11.17]	Human Diseases|Endocrine and metabolic disease|Cushing syndrome [PATH:ko04934]|calcium/calmodulin-dependent protein kinase (CaM kinase) II [EC:2.7.11.17]	Human Diseases|Infectious disease: bacterial|Tuberculosis [PATH:ko05152]|calcium/calmodulin-dependent protein kinase (CaM kinase) II [EC:2.7.11.17]	Brite Hierarchies|Protein families: metabolism|Protein kinases [BR:ko01001]|calcium/calmodulin-dependent protein kinase (CaM kinase) II [EC:2.7.11.17]
Thraus_T3086	Charged multivesicular body protein 3	CHMP3_RAT	42.553%	1.88e-36	K12193	NO_EC_NUMBER	Cellular Processes|Transport and catabolism|Endocytosis [PATH:ko04144]|charged multivesicular body protein 3	Cellular Processes|Cell growth and death|Necroptosis [PATH:ko04217]|charged multivesicular body protein 3	Brite Hierarchies|Protein families: genetic information processing|Membrane trafficking [BR:ko04131]|charged multivesicular body protein 3	Brite Hierarchies|Protein families: signaling and cellular processes|Exosome [BR:ko04147]|charged multivesicular body protein 3
Thraus_T2151	Activating signal cointegrator 1 {ECO:0000303|PubMed:10454579}	TRIP4_HUMAN	33.898%	1.9e-09	K23398	NO_EC_NUMBER	Brite Hierarchies|Protein families: genetic information processing|Chromosome and associated proteins [BR:ko03036]|activating signal cointegrator 1
Thraus_T2153	RING finger protein 32	RNF32_MOUSE	46.429%	1.52e-06	NO_KO_DATA	NO_EC_NUMBER	NO_KO_DATA
Thraus_T2152	UDP-N-acetylglucosamine transferase subunit ALG13 homolog	ALG13_RAT	41.86%	2.7e-22	K07432	2.4.1.141	Metabolism|Glycan biosynthesis and metabolism|N-Glycan biosynthesis [PATH:ko00510]|beta-1,4-N-acetylglucosaminyltransferase [EC:2.4.1.141]	Metabolism|Glycan biosynthesis and metabolism|Various types of N-glycan biosynthesis [PATH:ko00513]|beta-1,4-N-acetylglucosaminyltransferase [EC:2.4.1.141]	Brite Hierarchies|Protein families: metabolism|Glycosyltransferases [BR:ko01003]|beta-1,4-N-acetylglucosaminyltransferase [EC:2.4.1.141]
Thraus_T2155	DnaJ homolog subfamily B member 12	DJB12_BOVIN	49.138%	2.24e-23	K09518	NO_EC_NUMBER	Genetic Information Processing|Folding, sorting and degradation|Protein processing in endoplasmic reticulum [PATH:ko04141]|DnaJ homolog subfamily B member 12	Brite Hierarchies|Protein families: genetic information processing|Chaperones and folding catalysts [BR:ko03110]|DnaJ homolog subfamily B member 12
Thraus_T4708	Parkin coregulated gene protein homolog	PACRG_MOUSE	58.937%	4.23e-73	NO_KO_DATA	NO_EC_NUMBER	NO_KO_DATA
Thraus_T2157	Cofilin	COFI_GIBZE	32.484%	1.32e-19	K05765	NO_EC_NUMBER	Cellular Processes|Cell motility|Regulation of actin cytoskeleton [PATH:ko04810]|cofilin	Organismal Systems|Immune system|Fc gamma R-mediated phagocytosis [PATH:ko04666]|cofilin	Organismal Systems|Development and regeneration|Axon guidance [PATH:ko04360]|cofilin	Human Diseases|Infectious disease: bacterial|Pertussis [PATH:ko05133]|cofilin	Human Diseases|Infectious disease: viral|Human immunodeficiency virus 1 infection [PATH:ko05170]|cofilin	Brite Hierarchies|Protein families: genetic information processing|Membrane trafficking [BR:ko04131]|cofilin	Brite Hierarchies|Protein families: signaling and cellular processes|Cytoskeleton proteins [BR:ko04812]|cofilin	Brite Hierarchies|Protein families: signaling and cellular processes|Exosome [BR:ko04147]|cofilin
Thraus_T2156	Dual specificity protein kinase shkC	SHKC_DICDI	35.065%	3.26e-16	NO_KO_DATA	NO_EC_NUMBER	NO_KO_DATA
Thraus_T758	Cardiolipin synthase (CMP-forming)	CRLS1_RAT	34.973%	5.17e-23	K08744	2.7.8.41	Metabolism|Lipid metabolism|Glycerophospholipid metabolism [PATH:ko00564]|cardiolipin synthase (CMP-forming) [EC:2.7.8.41]
Thraus_T759	Heterogeneous nuclear ribonucleoproteins A2/B1	ROA2_BOVIN	39.08%	7.16e-13	K13158	NO_EC_NUMBER	Brite Hierarchies|Protein families: genetic information processing|Messenger RNA biogenesis [BR:ko03019]|heterogeneous nuclear ribonucleoprotein A2/B1	Brite Hierarchies|Protein families: genetic information processing|Spliceosome [BR:ko03041]|heterogeneous nuclear ribonucleoprotein A2/B1	Brite Hierarchies|Protein families: signaling and cellular processes|Exosome [BR:ko04147]|heterogeneous nuclear ribonucleoprotein A2/B1
Thraus_T2030	Transforming protein Myb	MYB_AVIMB	40.708%	3.77e-20	NO_KO_DATA	NO_EC_NUMBER	NO_KO_DATA
[truncated: 3,578 more rows]
[truncated: 76 more columns]
